# Supplementary material for: The Shape of Human Red Blood Cells Suspended in Autologous Plasma and Serum
Source: MDPI journal article supplement (doi:10.3390/cells11121941), 2022-06-16
Supplement: s1 [file s1]

## Donor 1, plasma

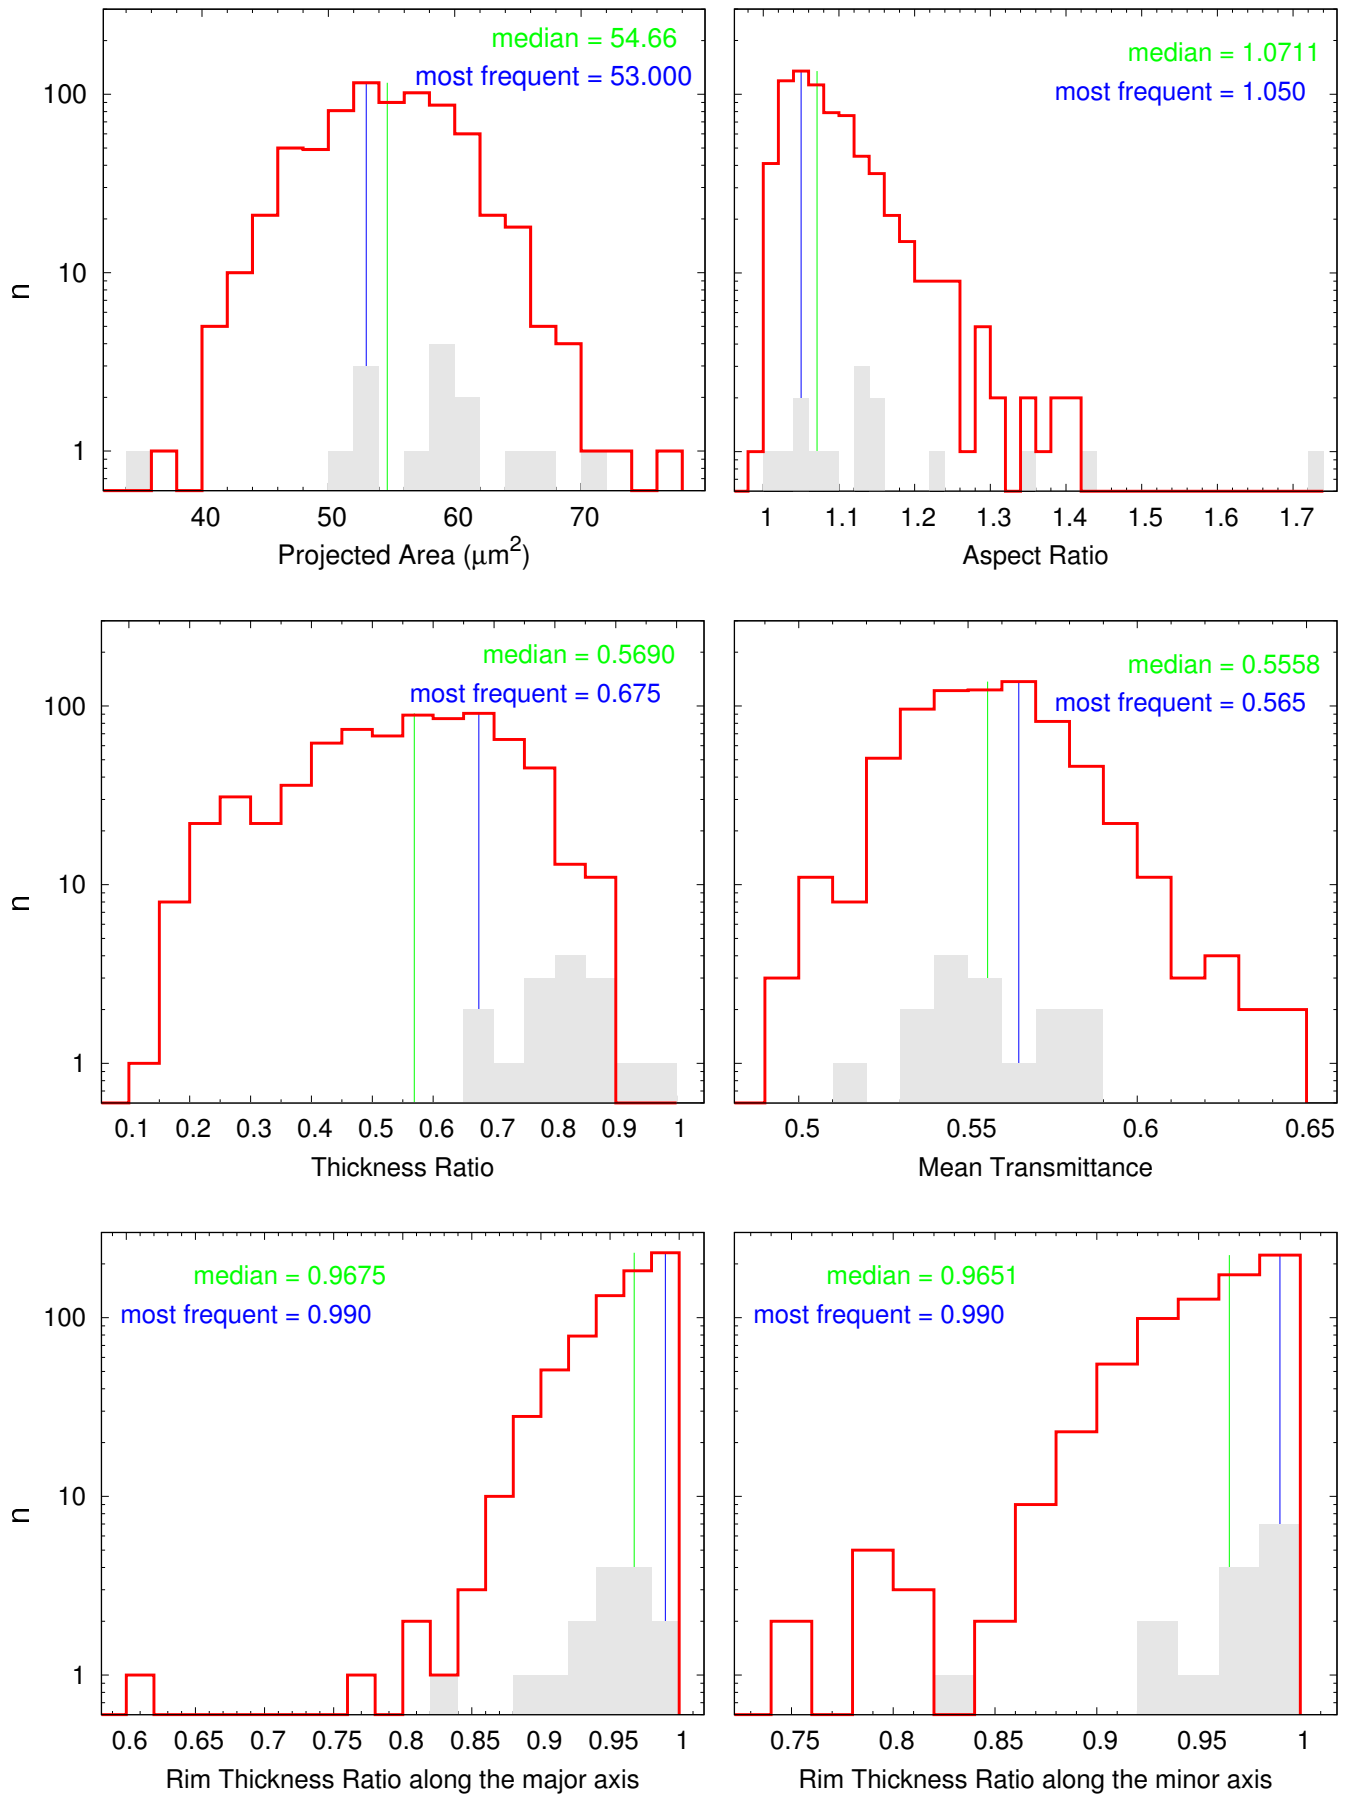

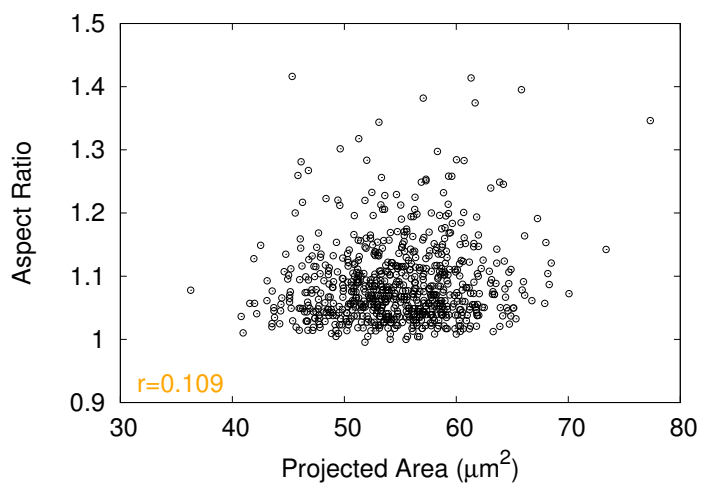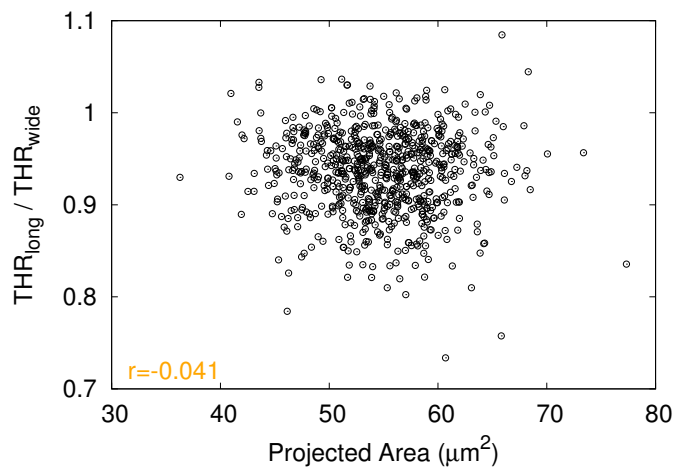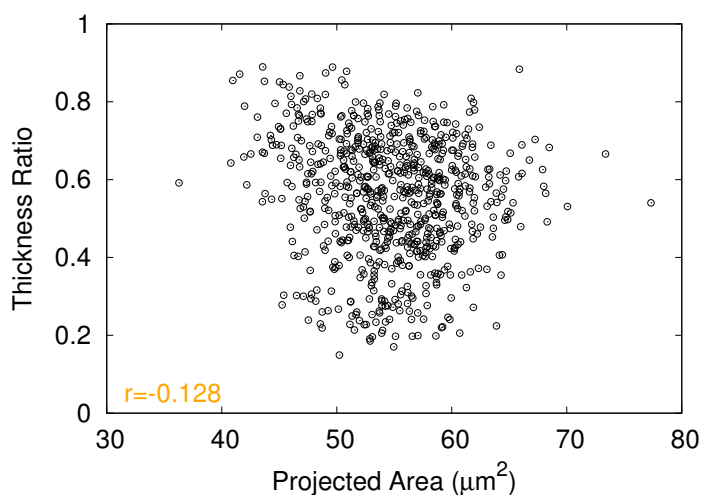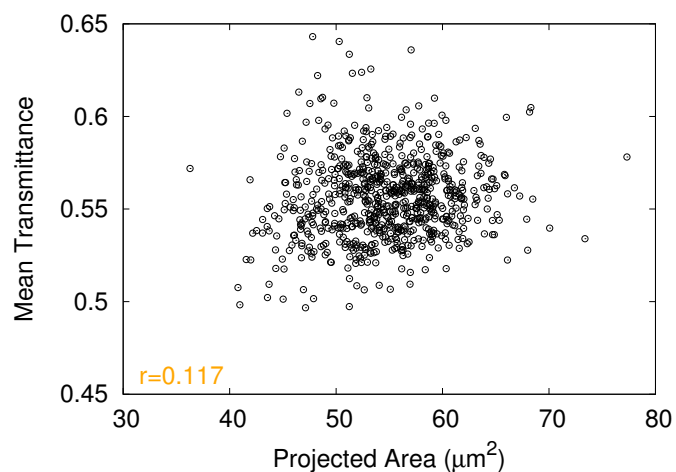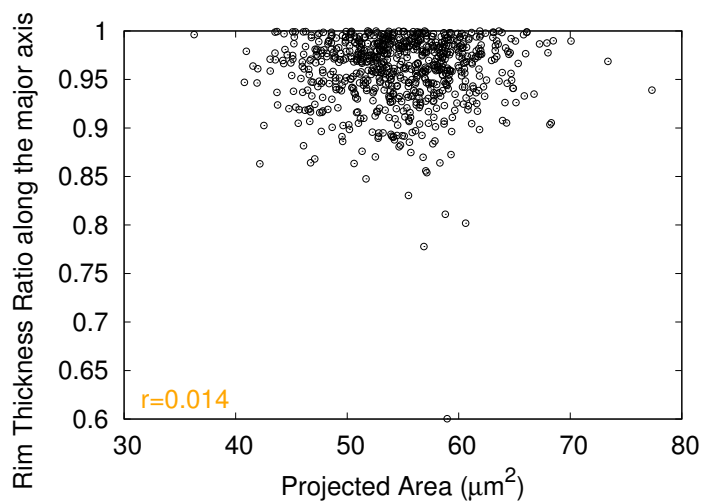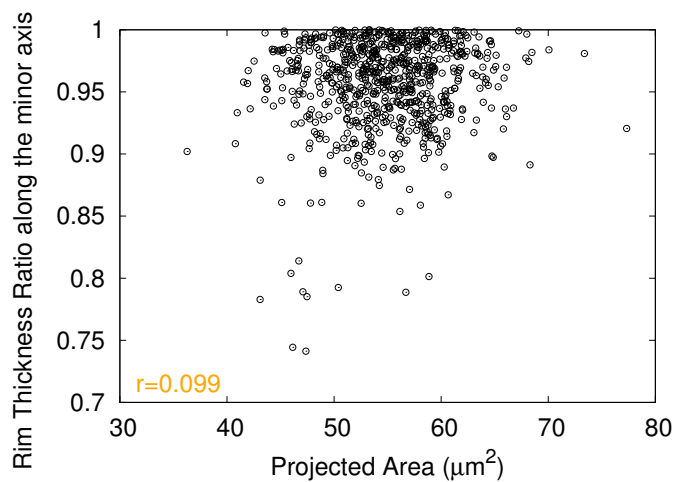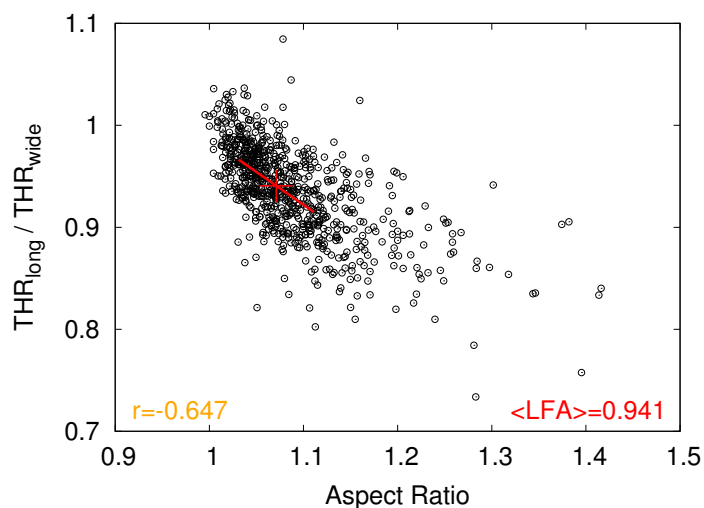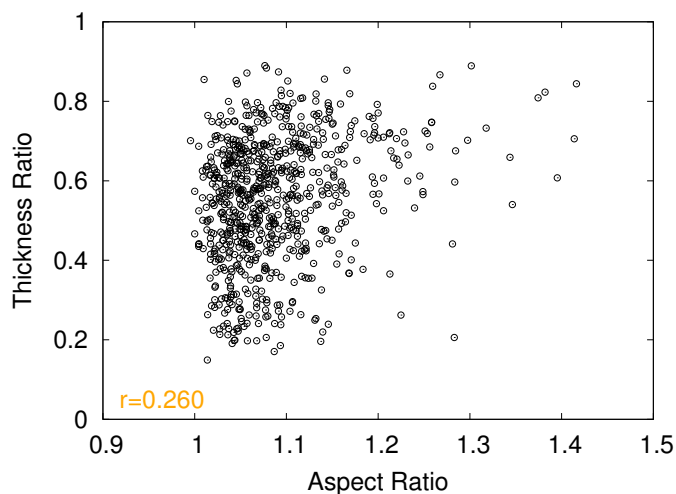

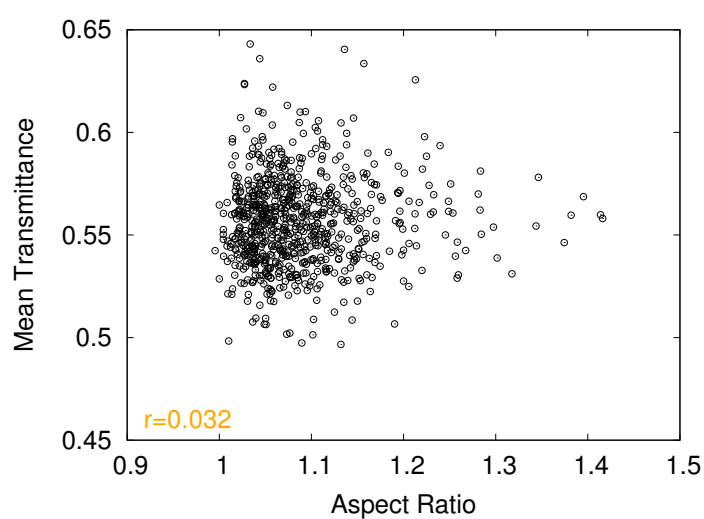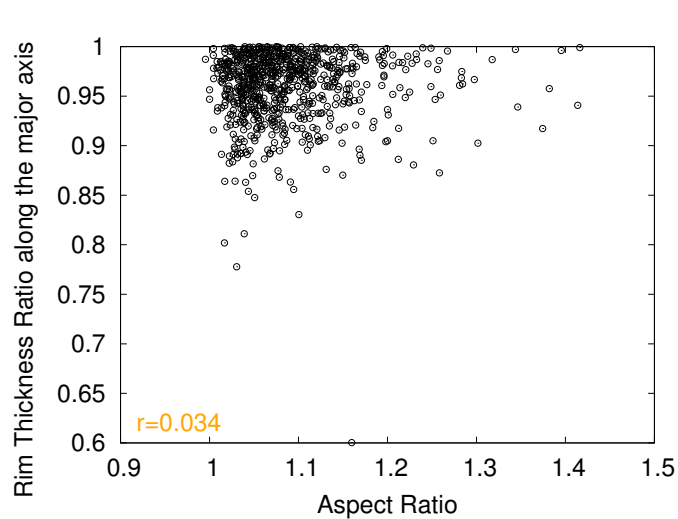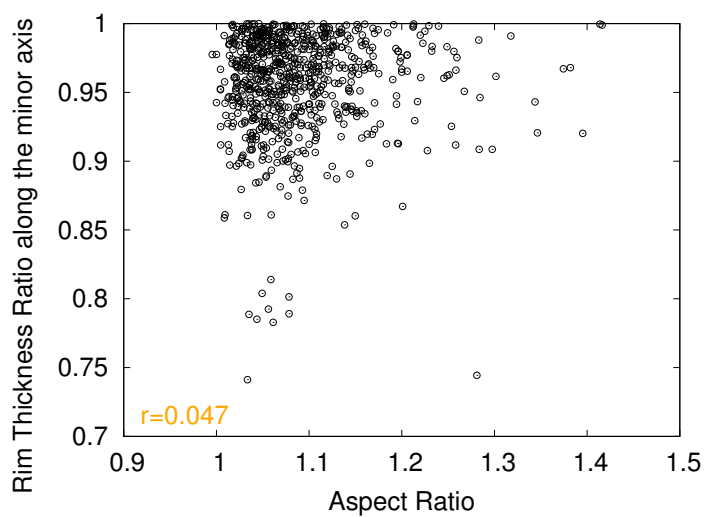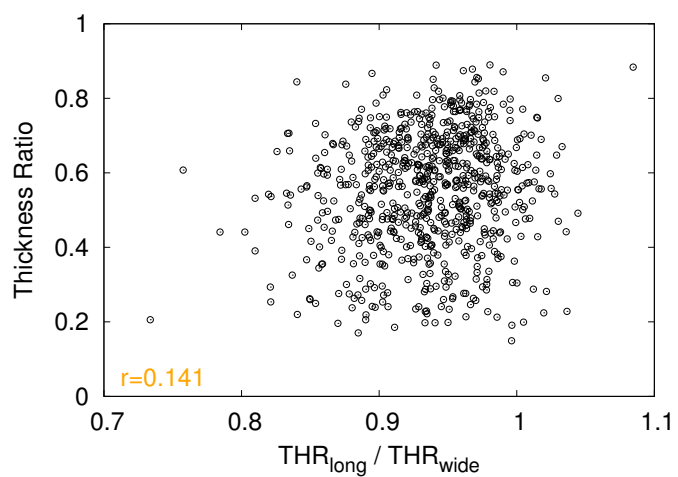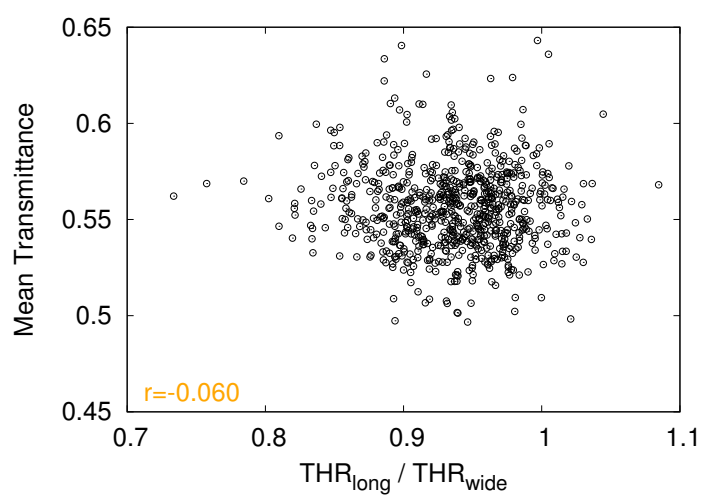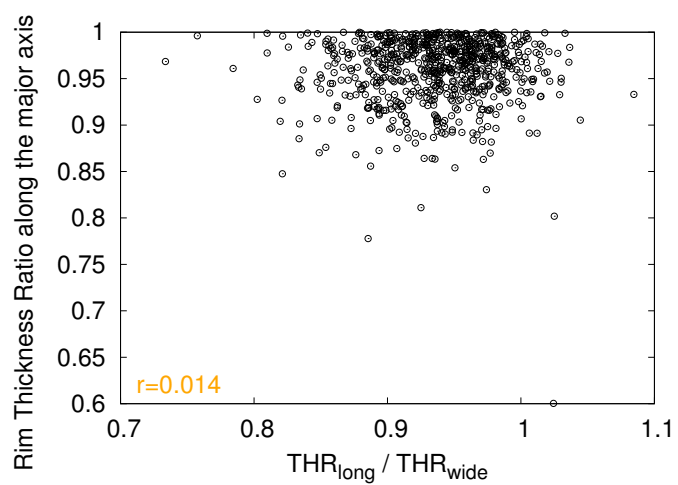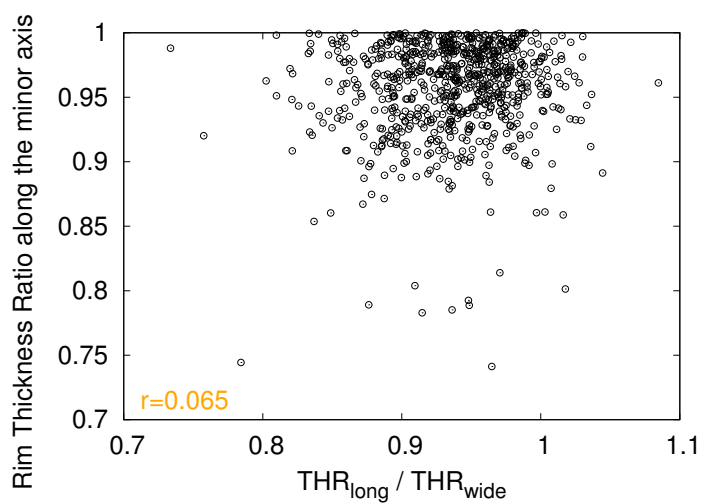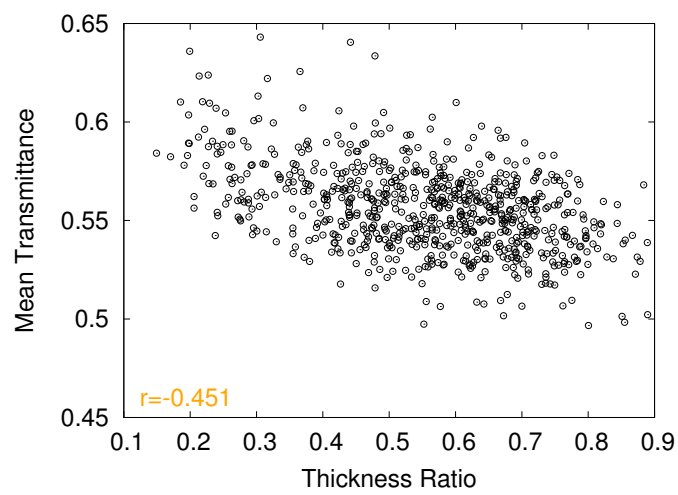

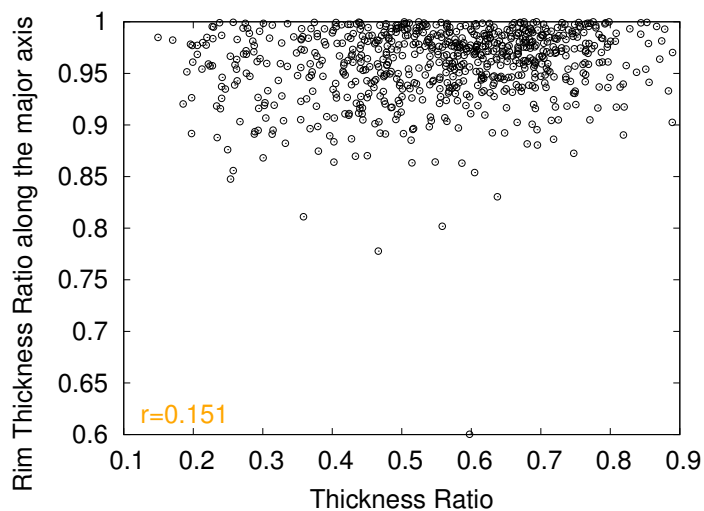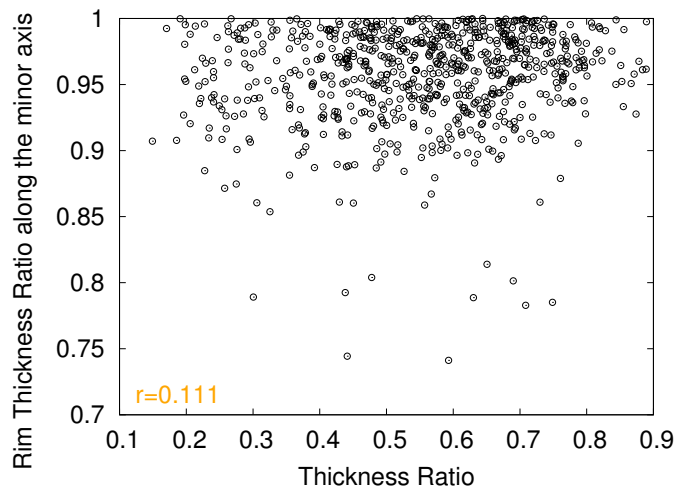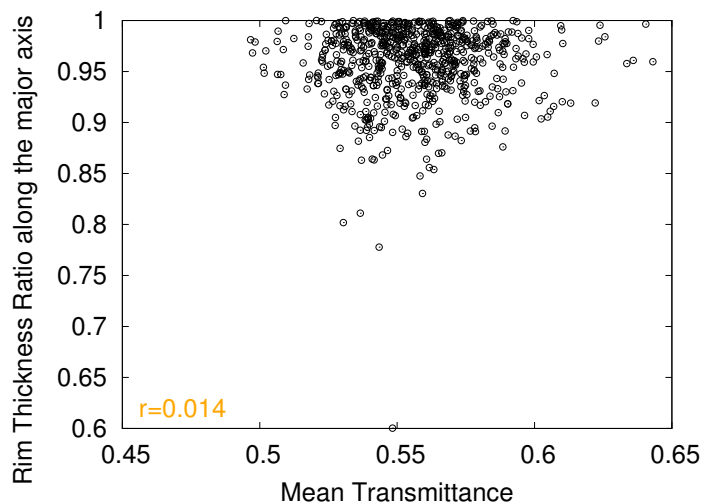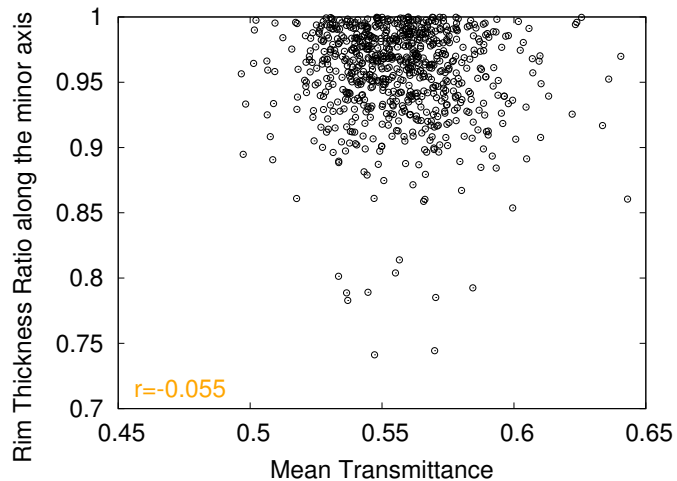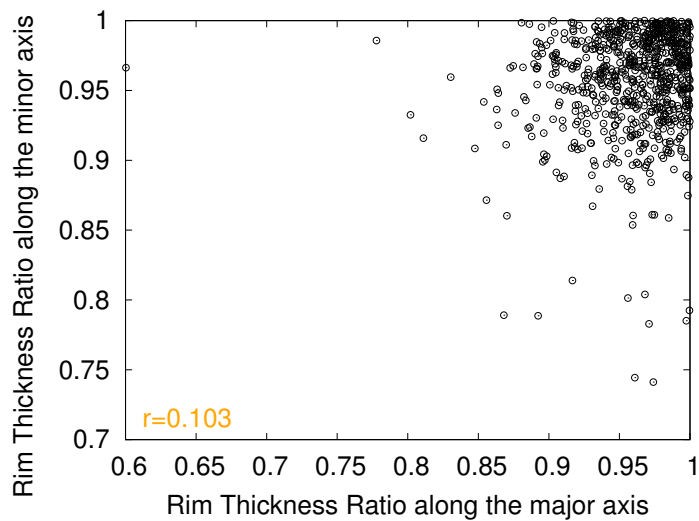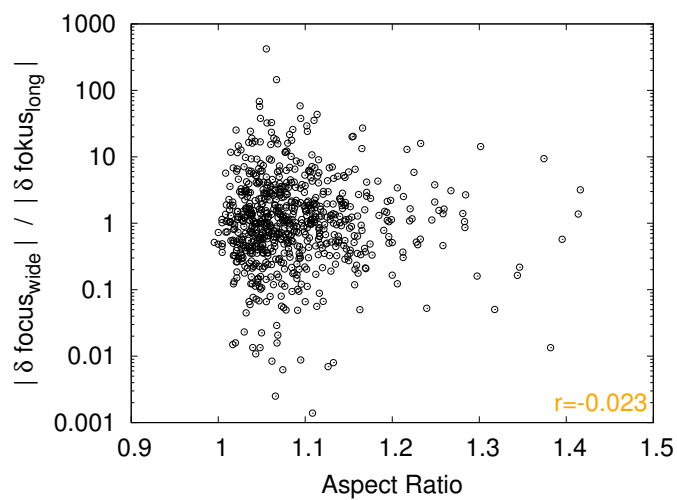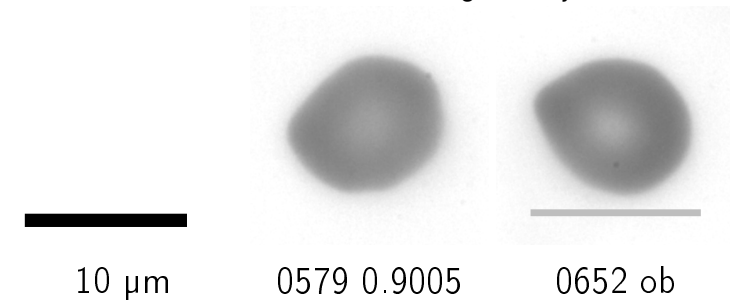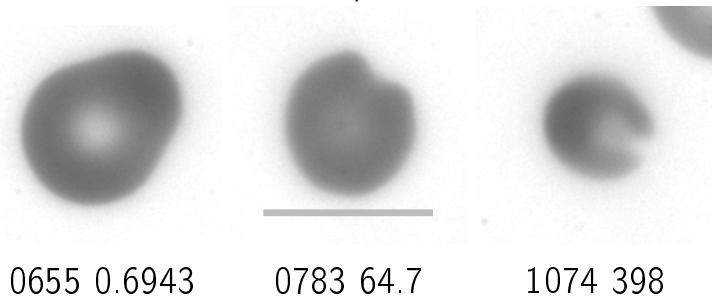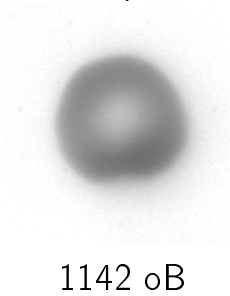



## Donor 1, serum

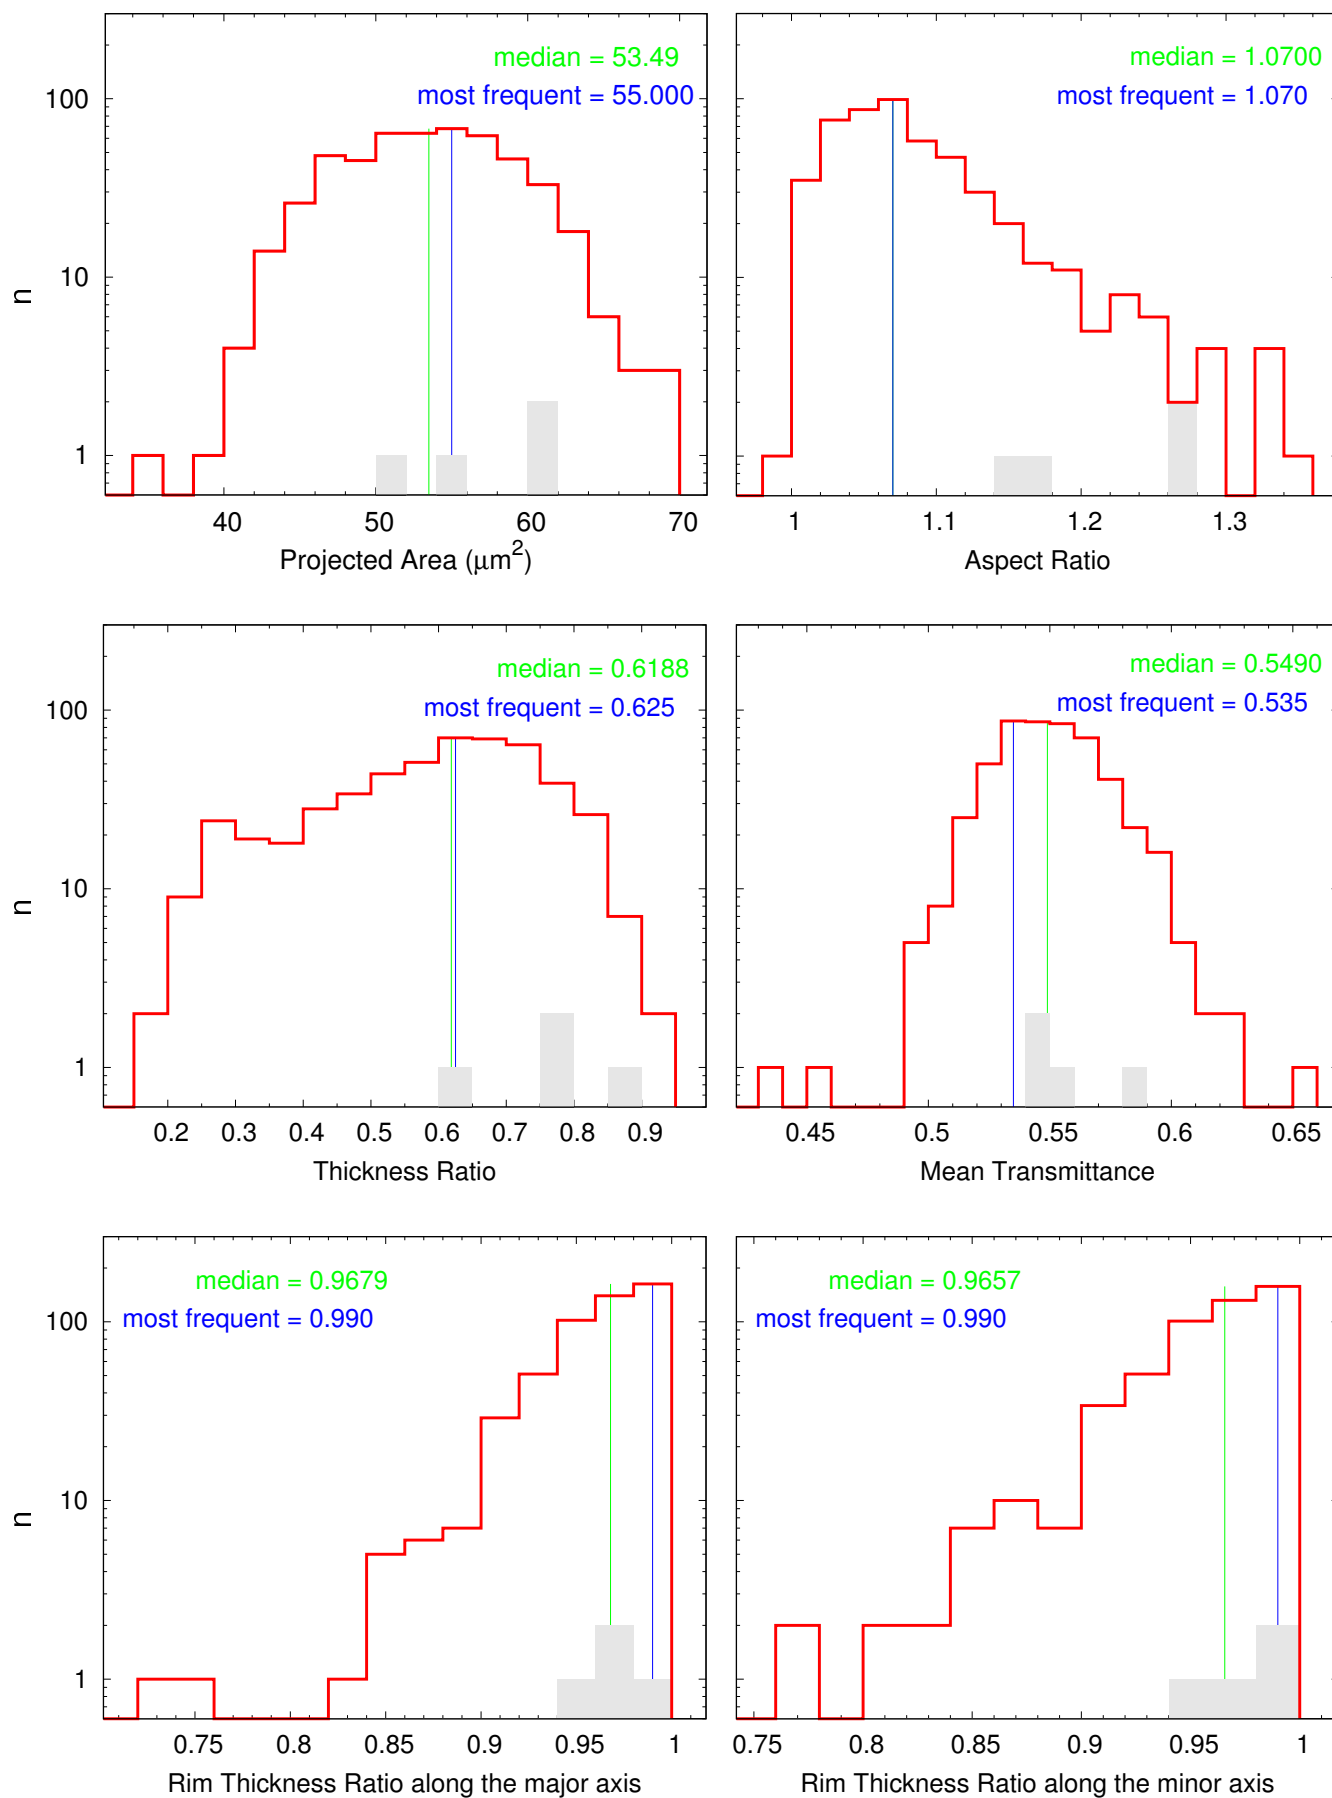

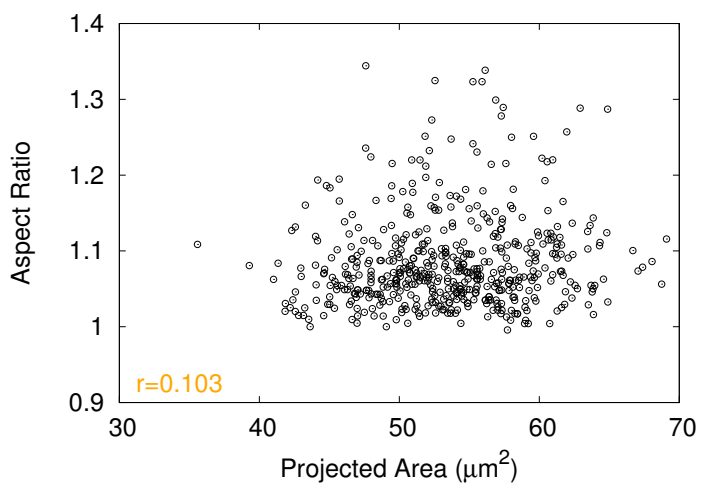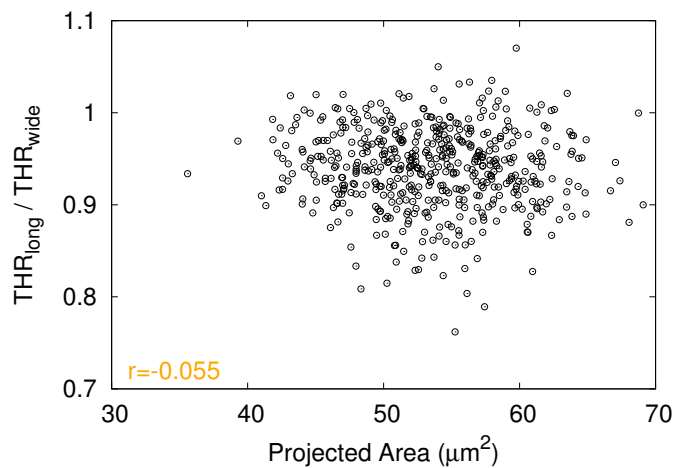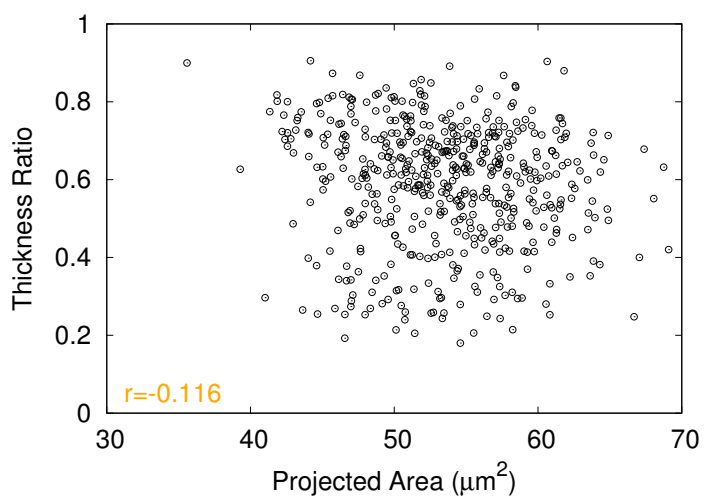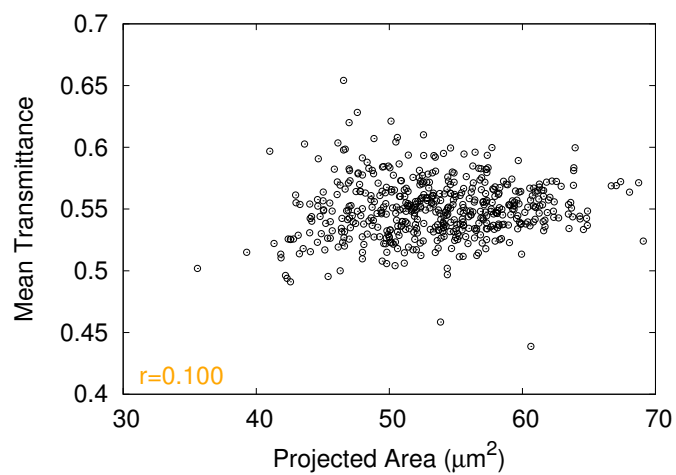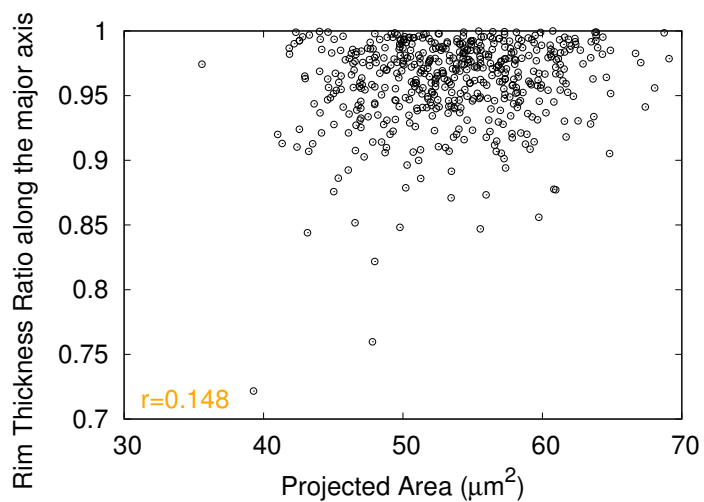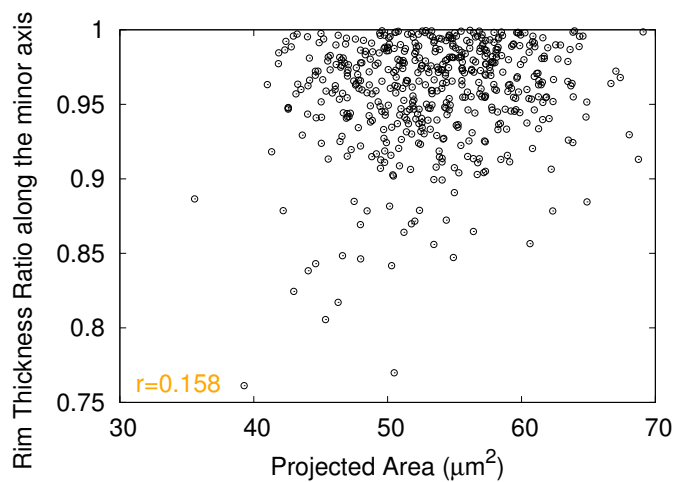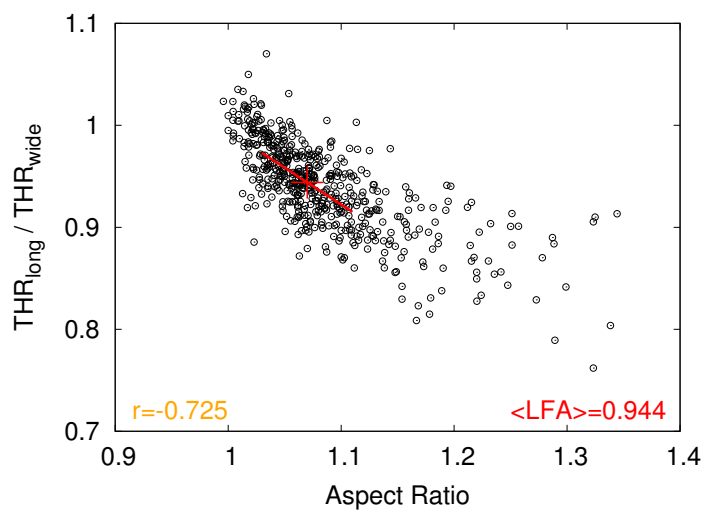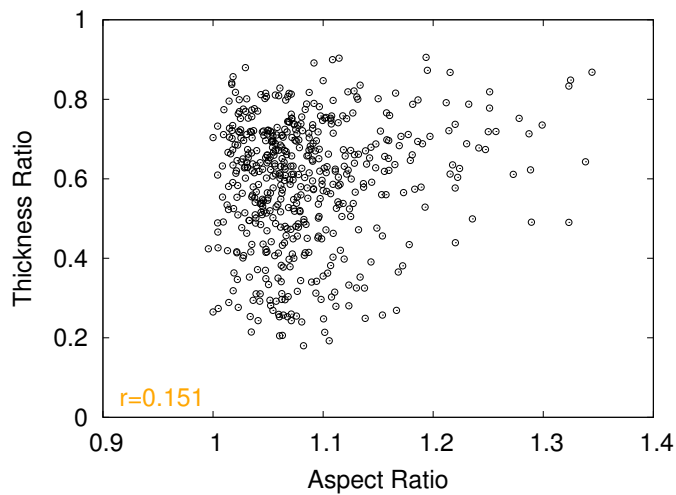

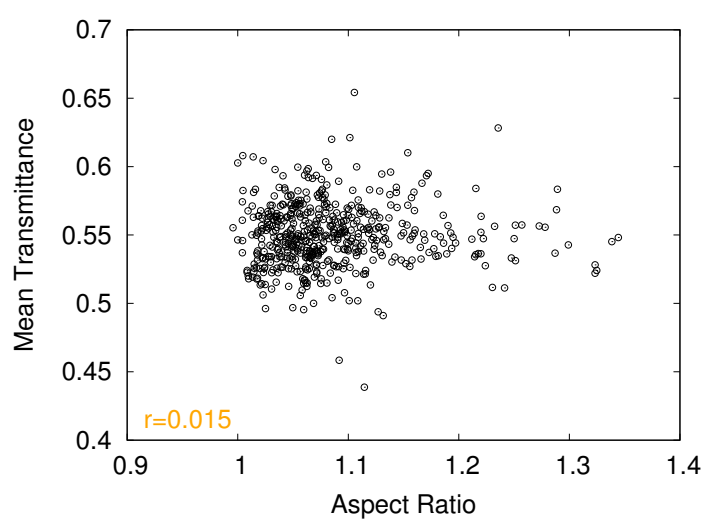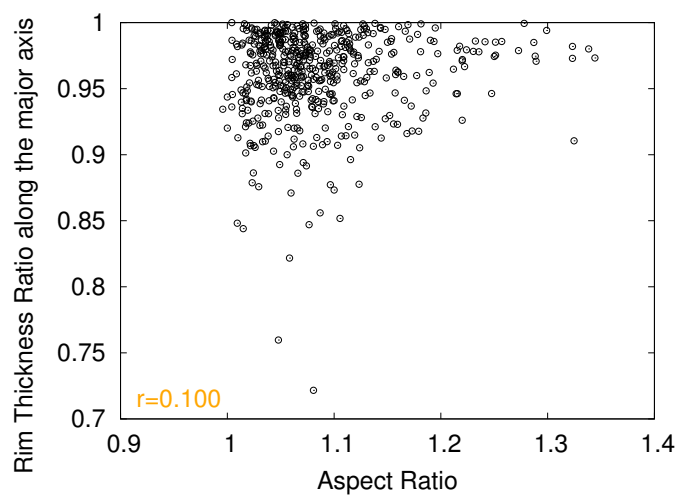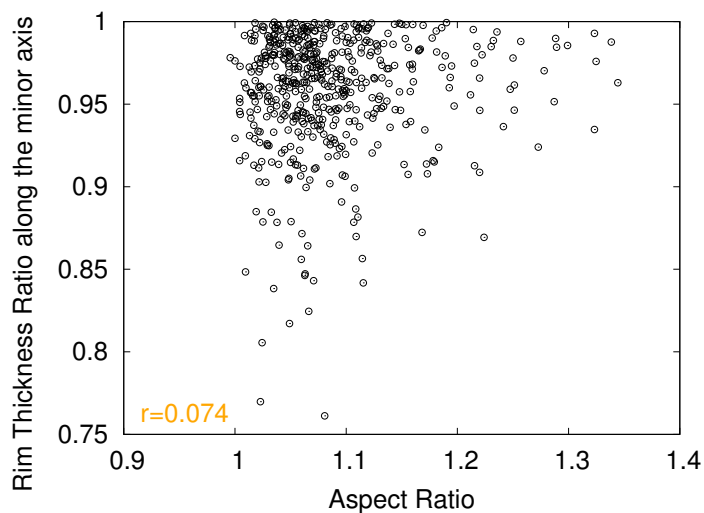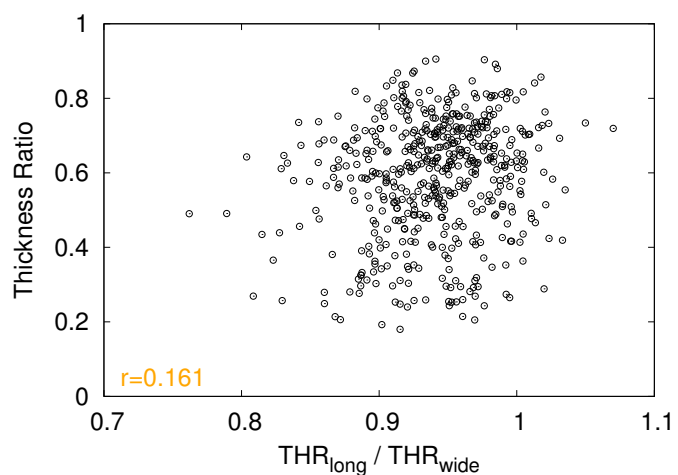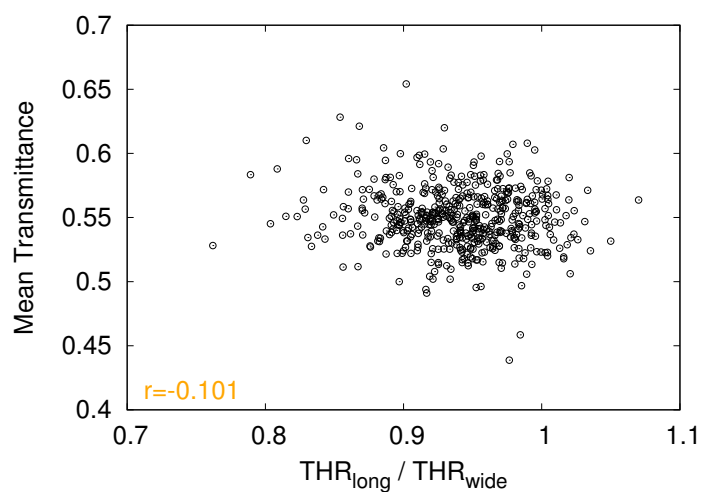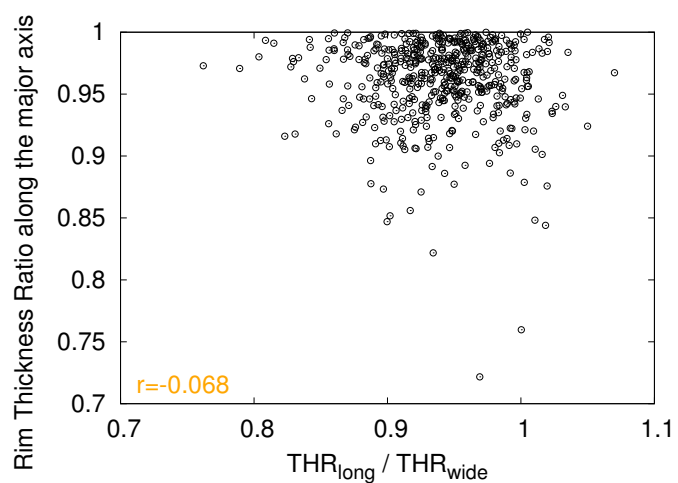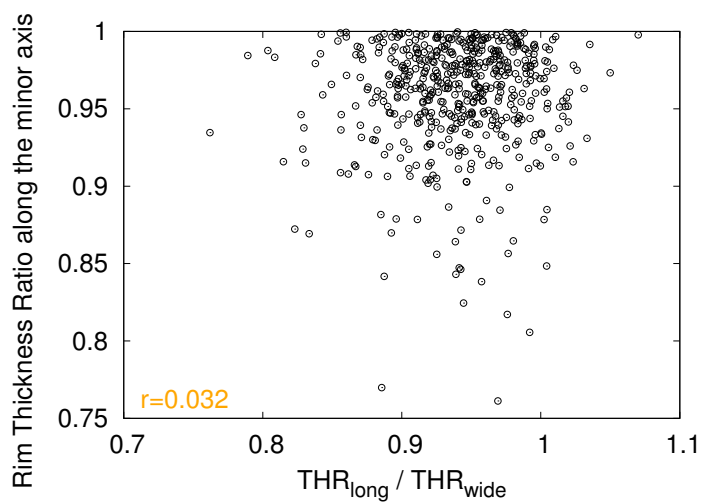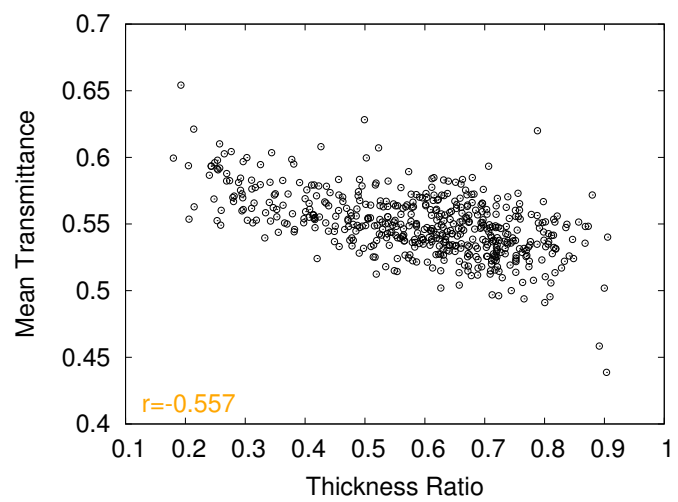

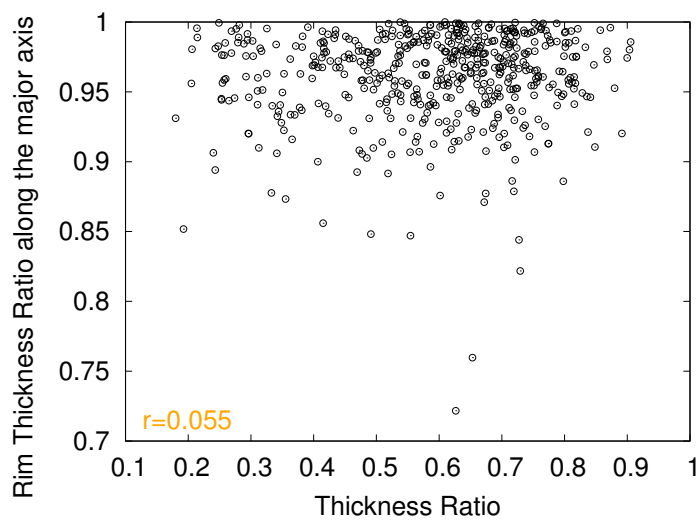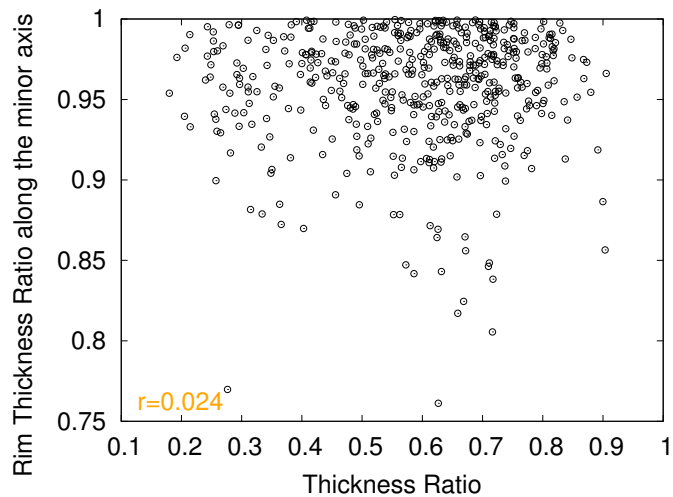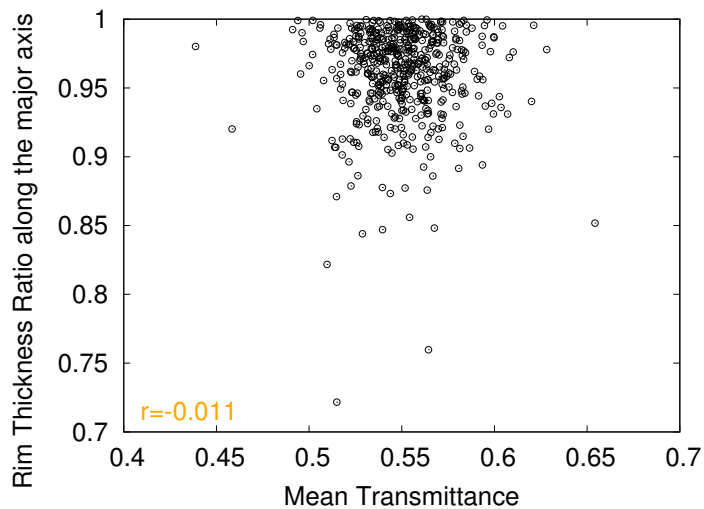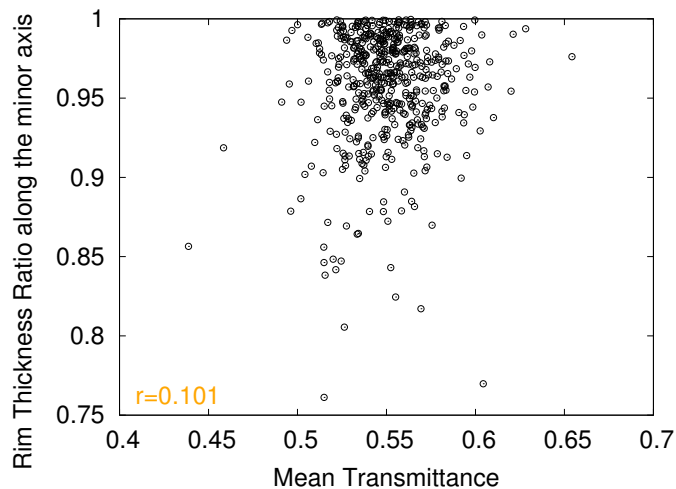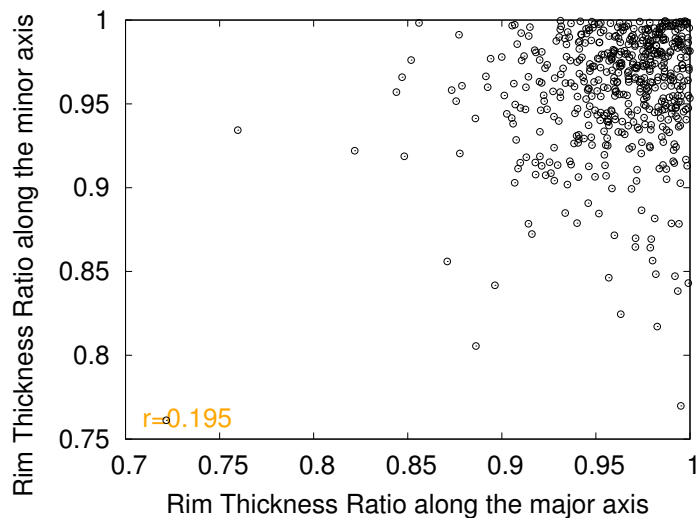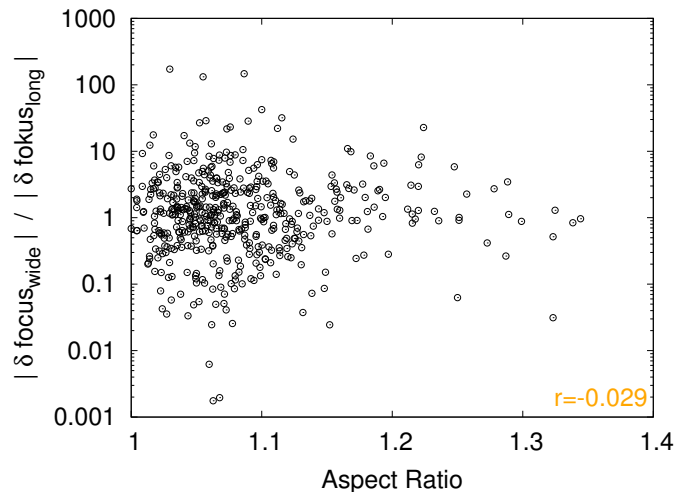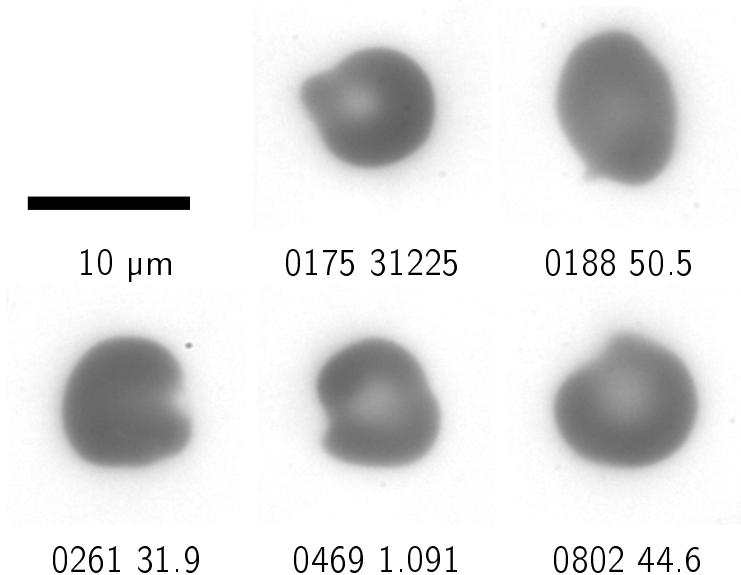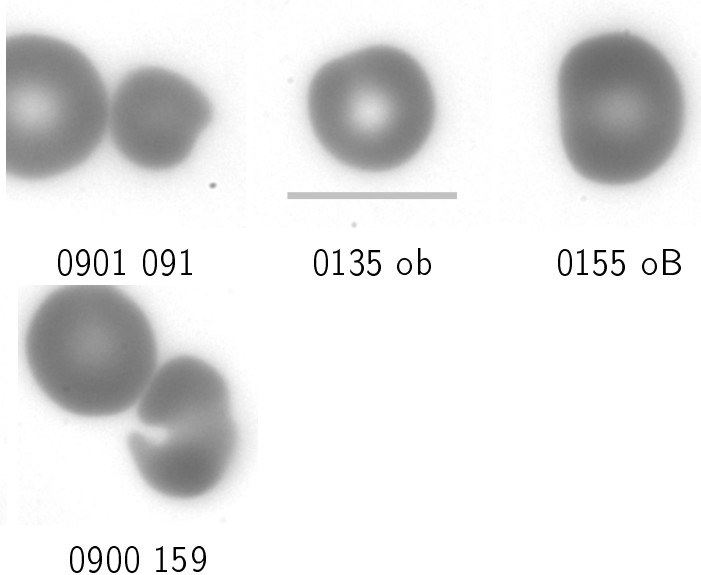

## Donor 2, plasma

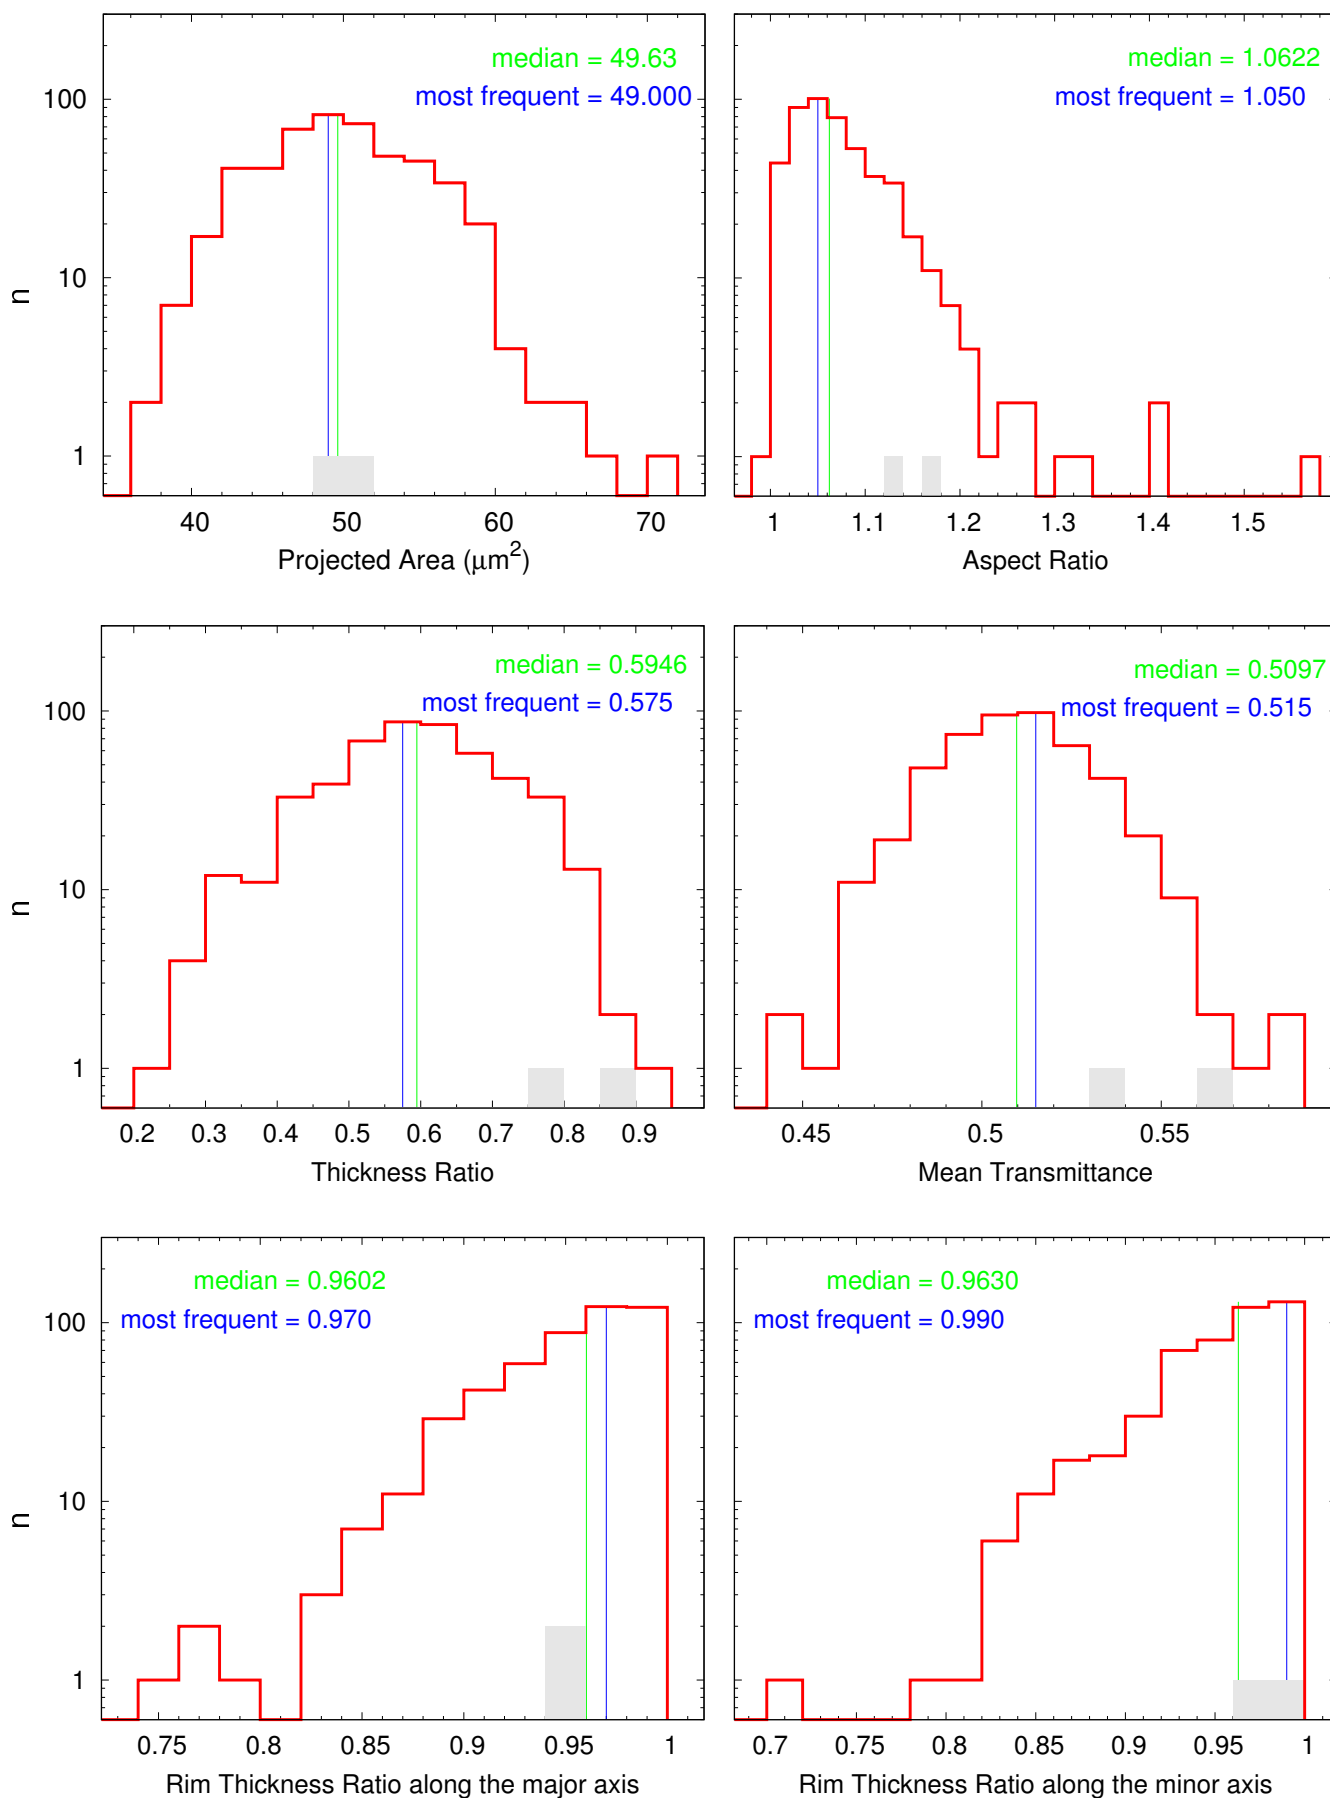

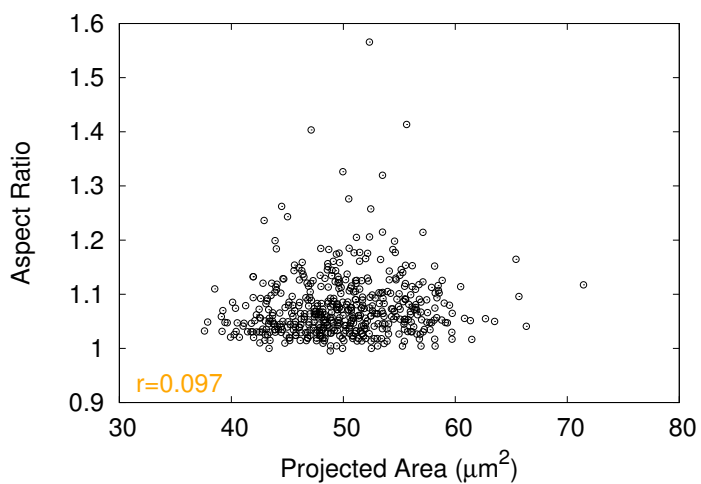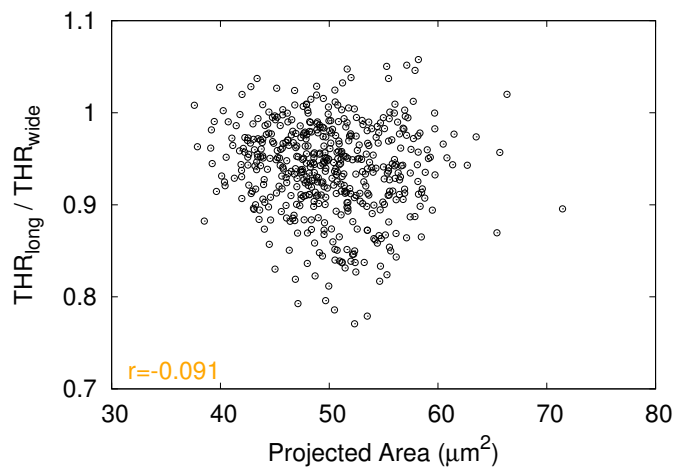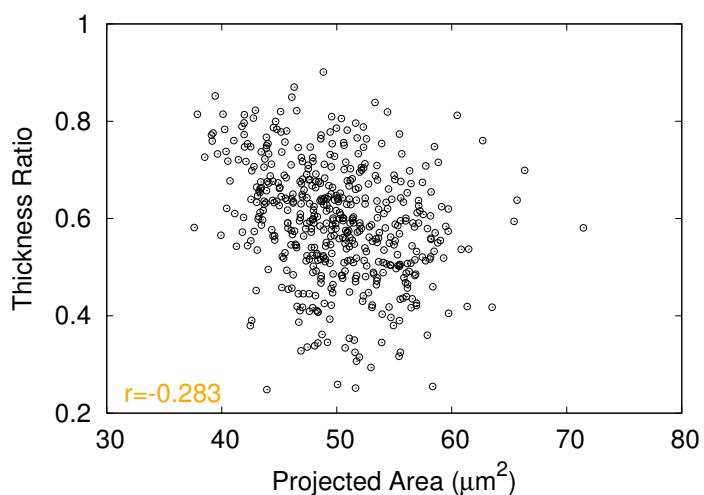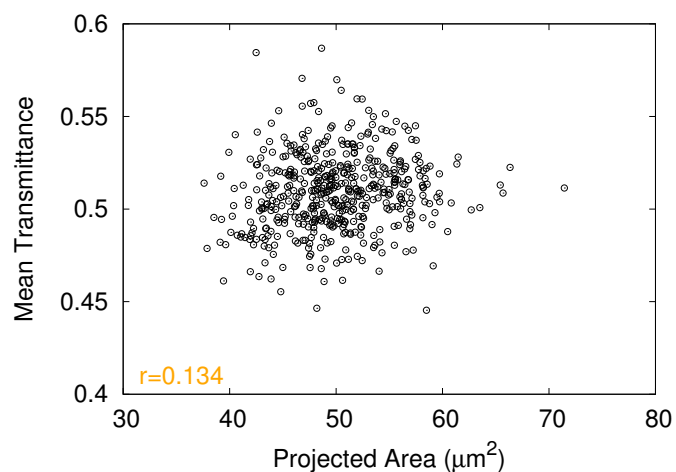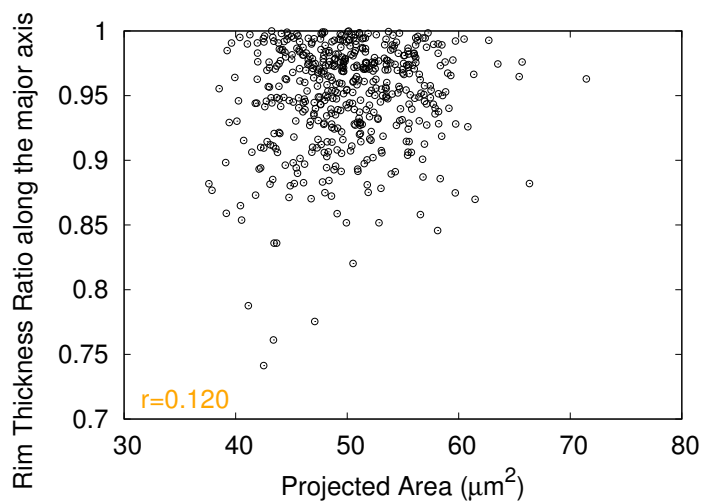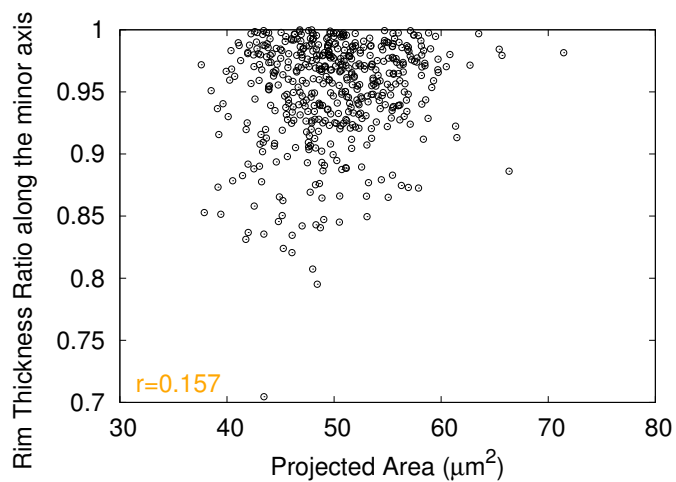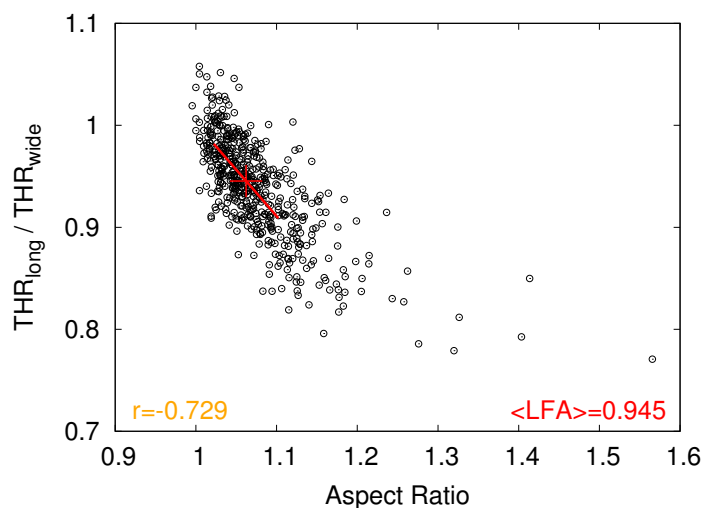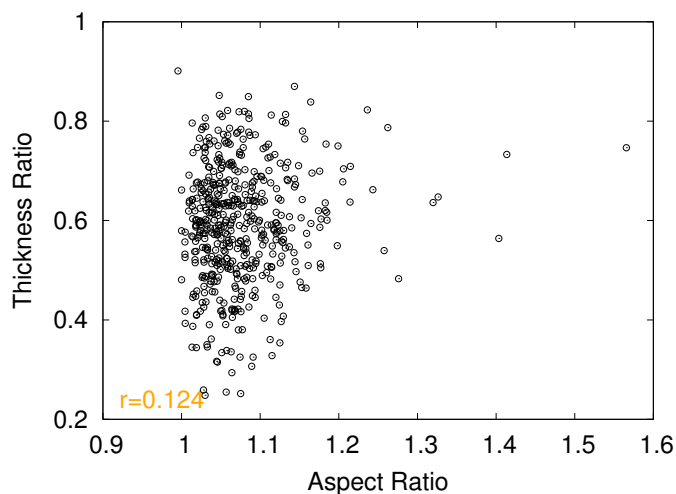



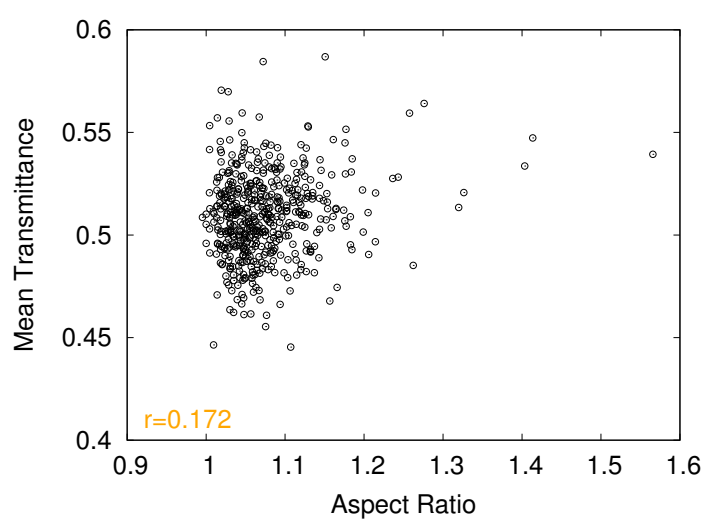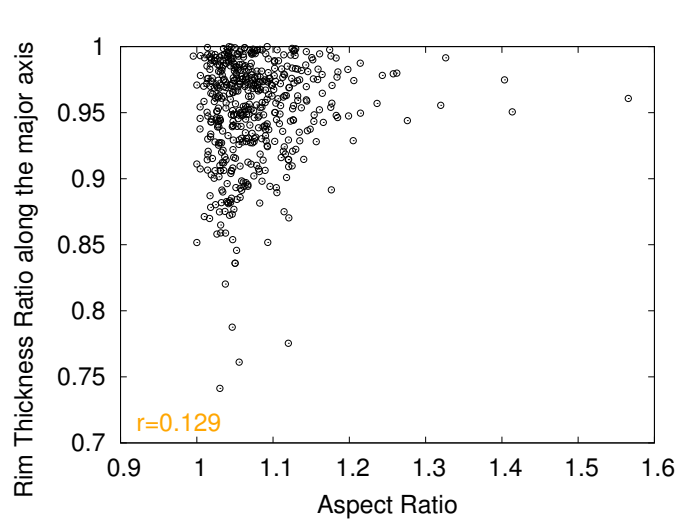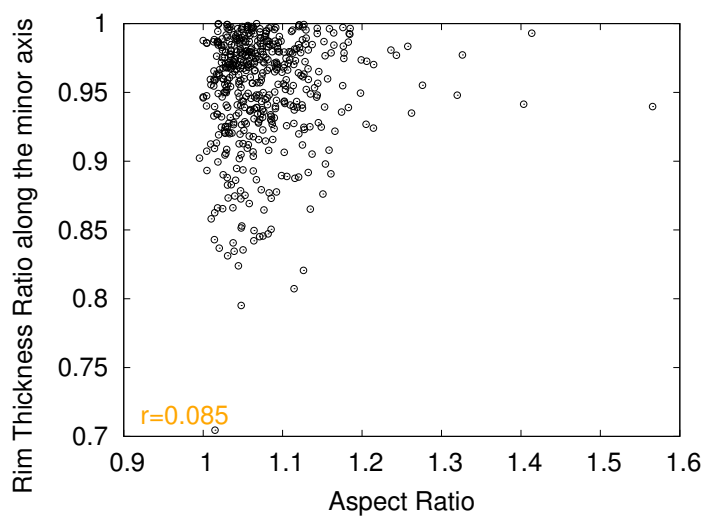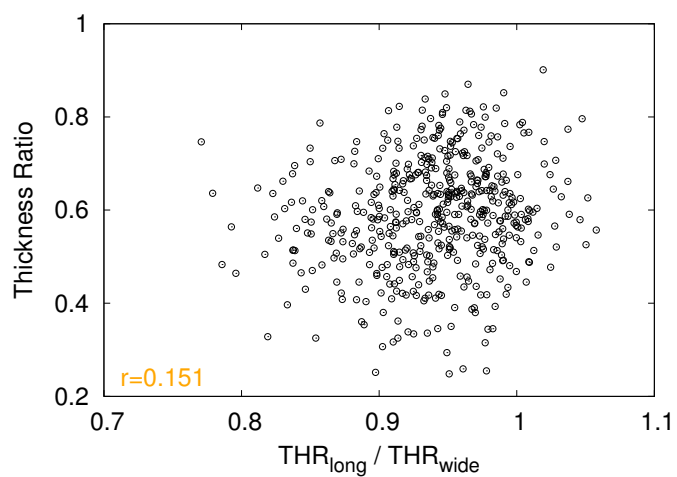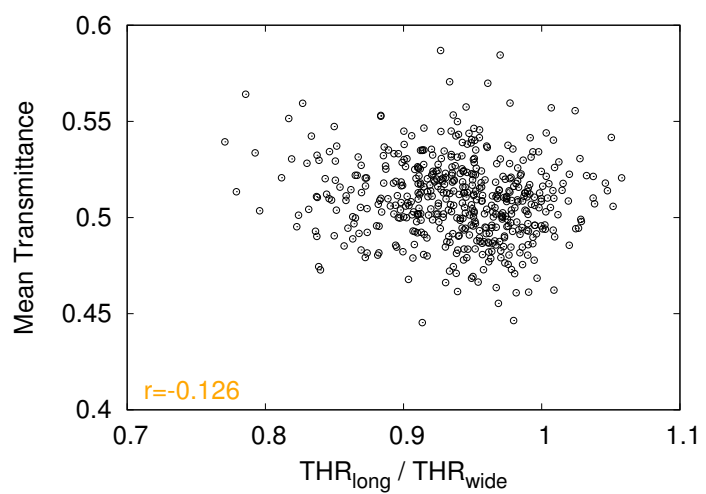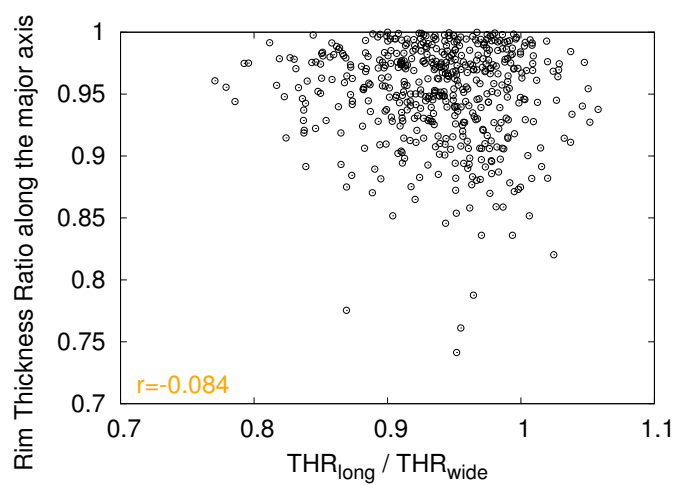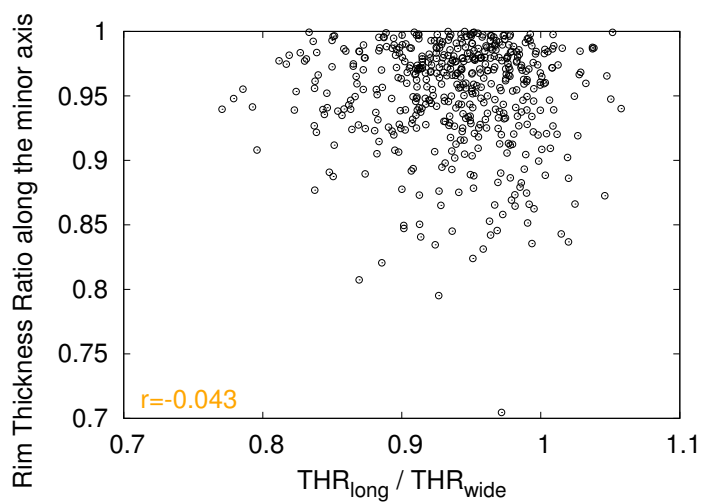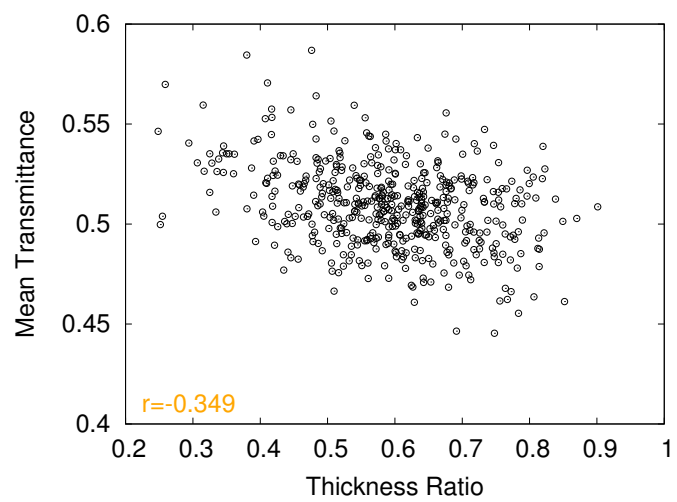

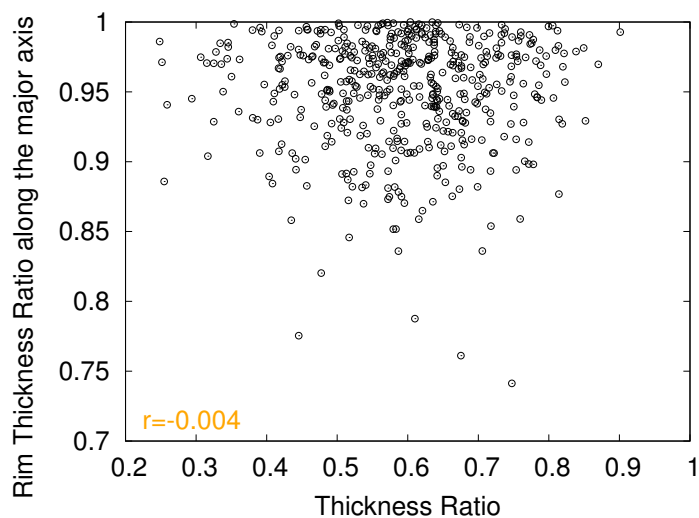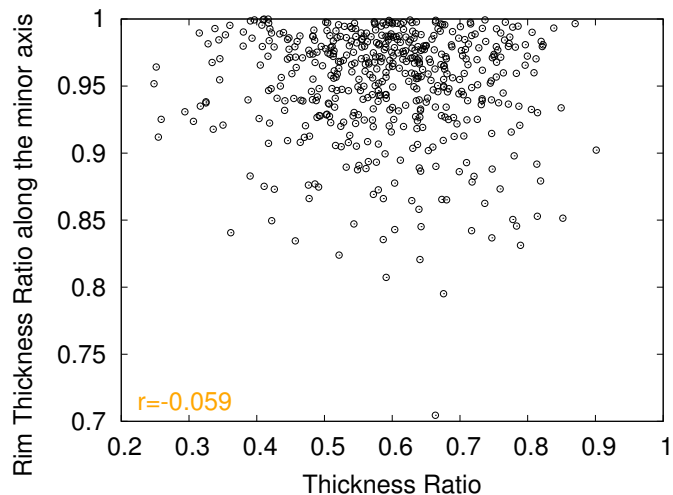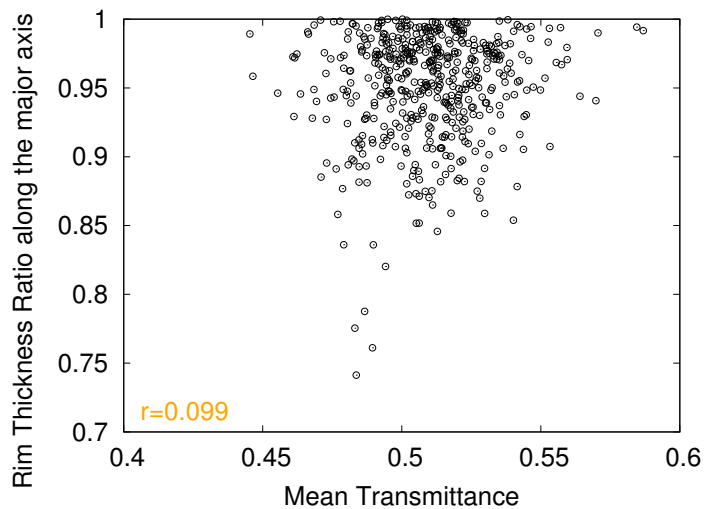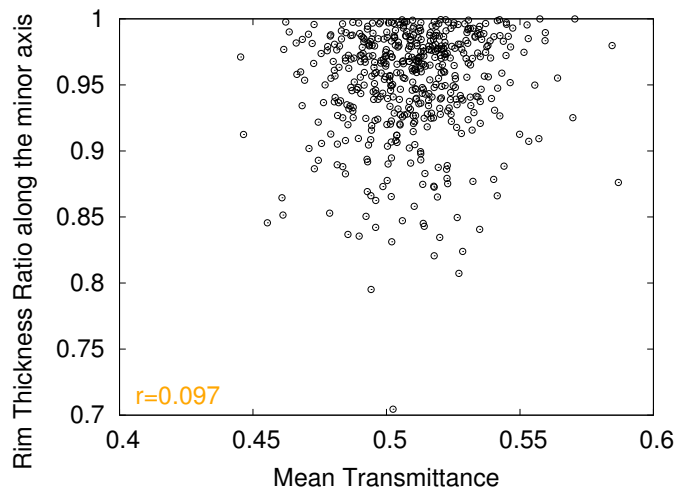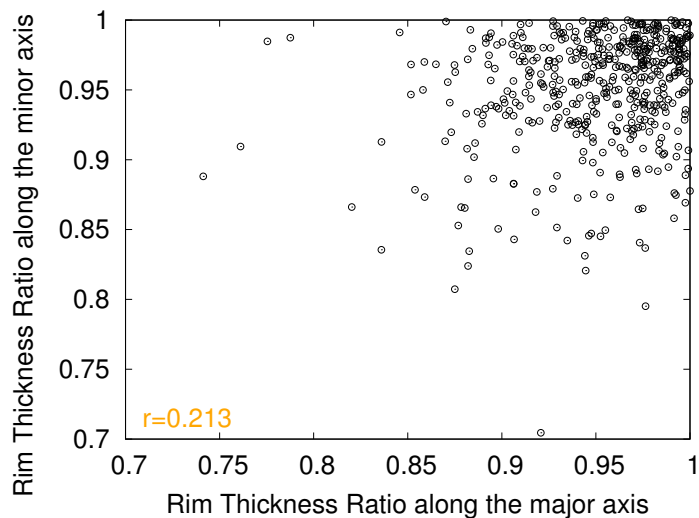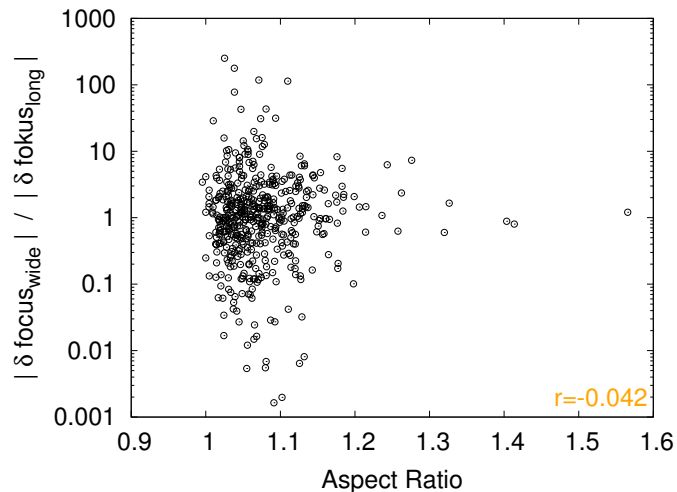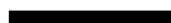

10  $\mu\text{m}$

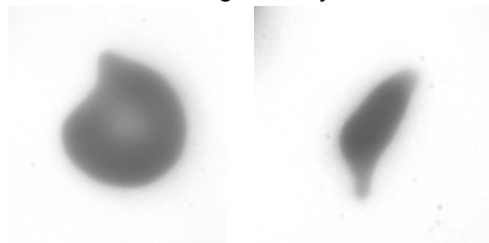

0028 53.3

0140 018

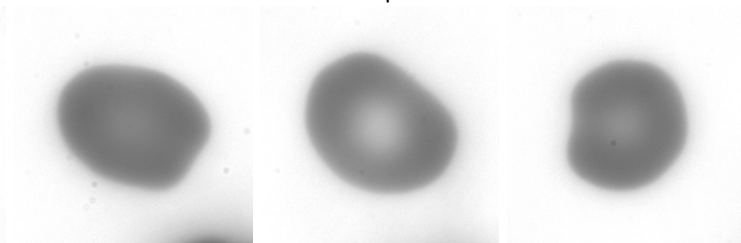

0716 ob

0961 ob

1034 1.0095

## Donor 3, plasma

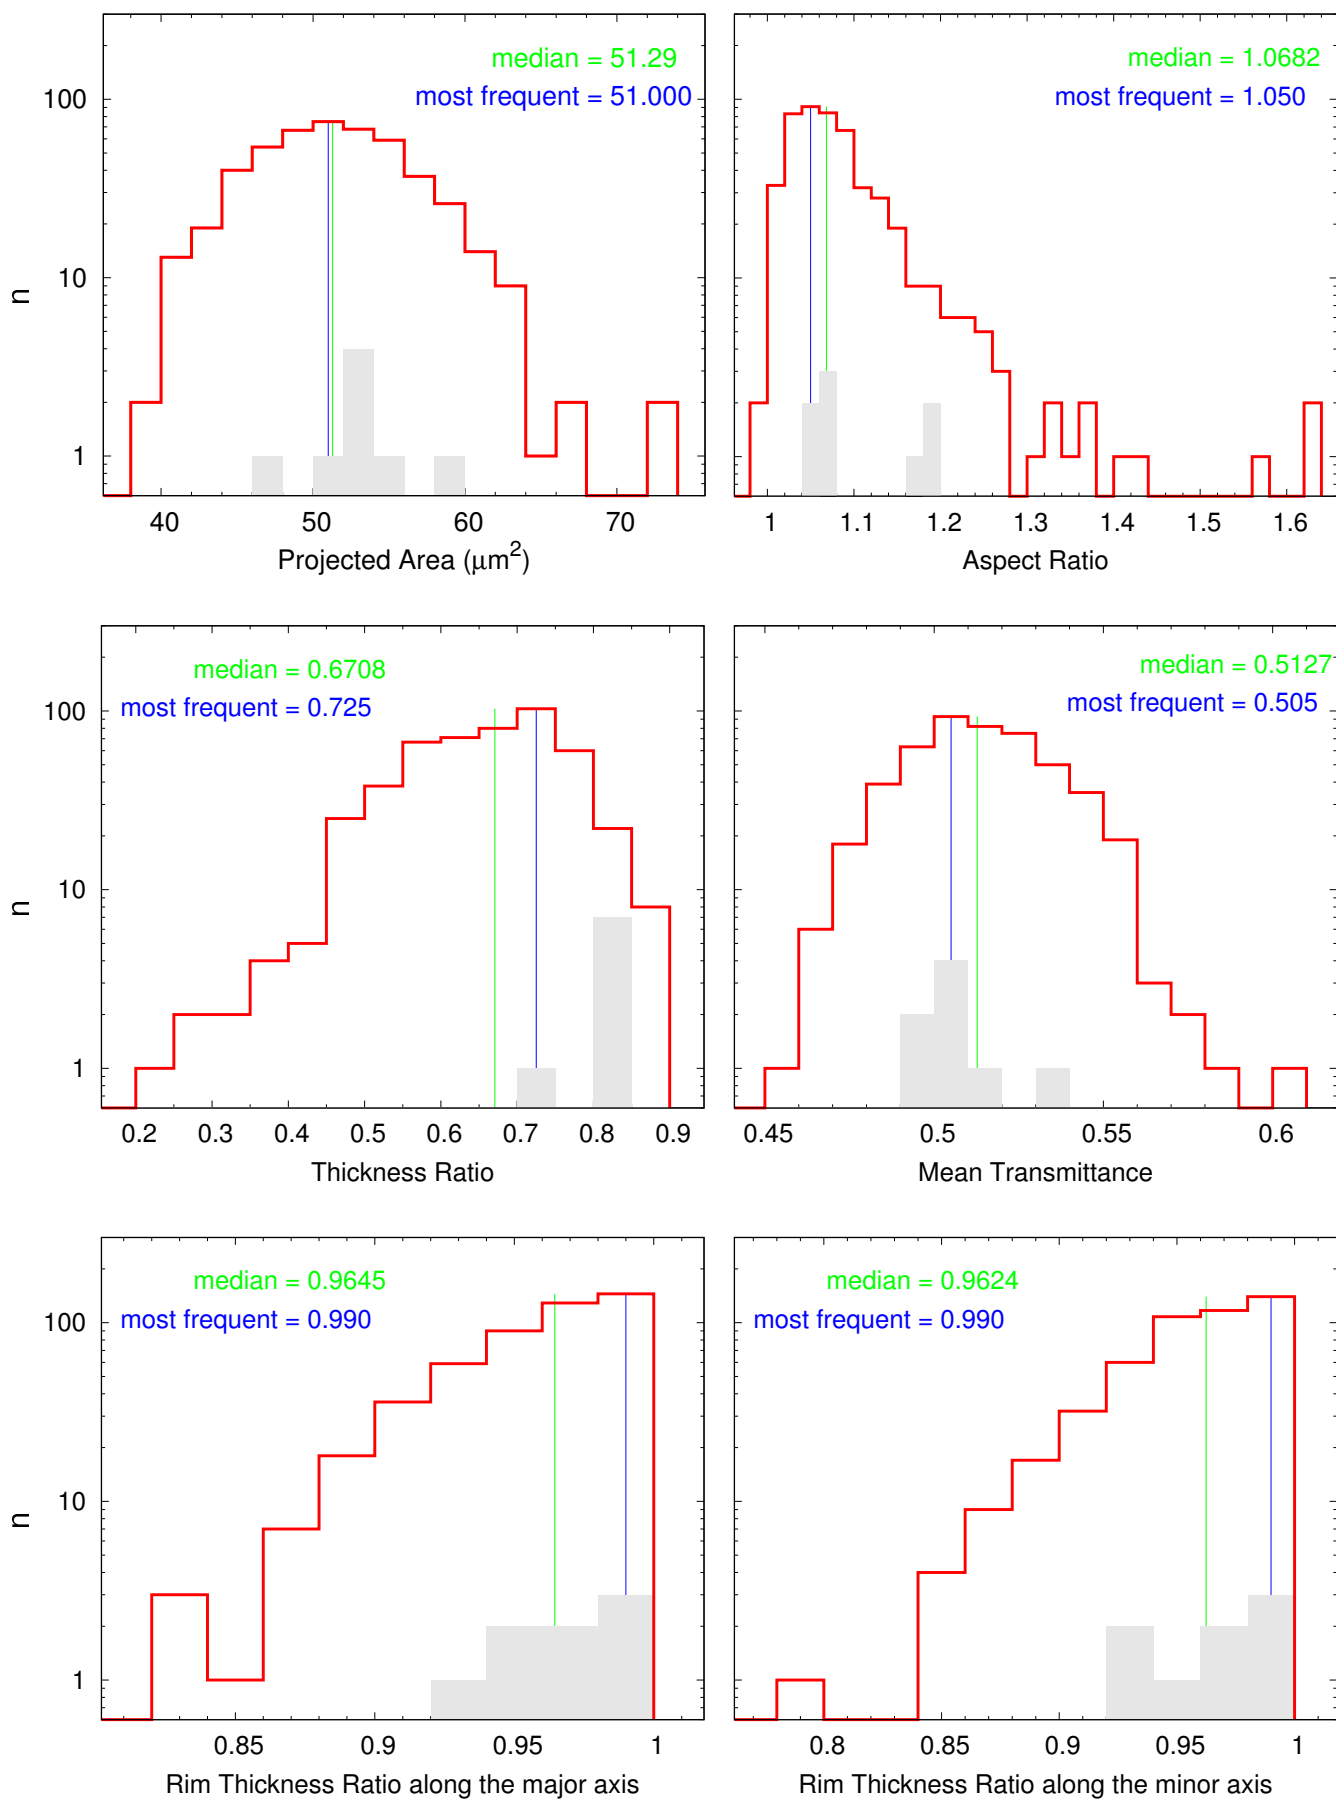

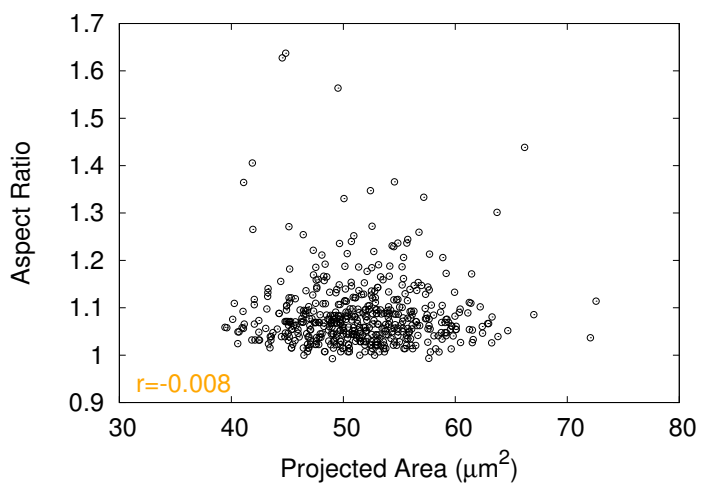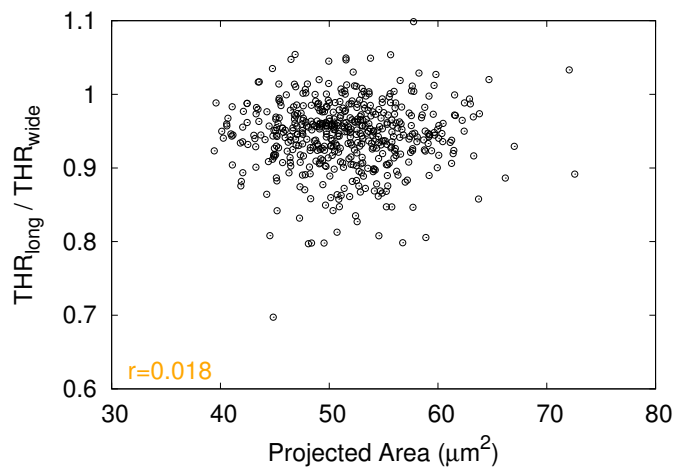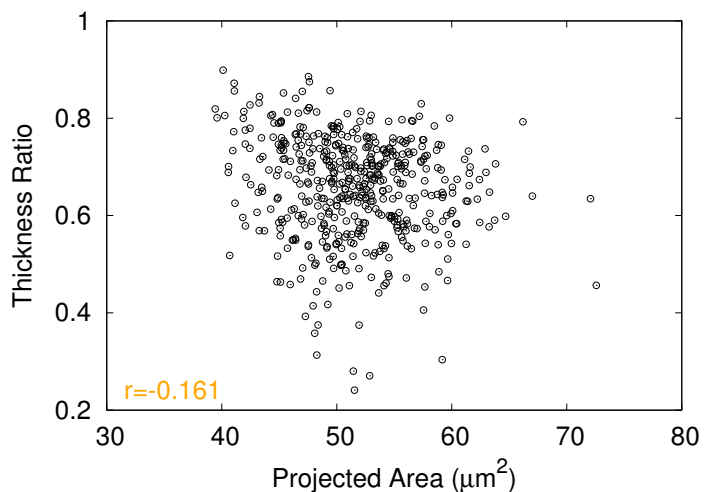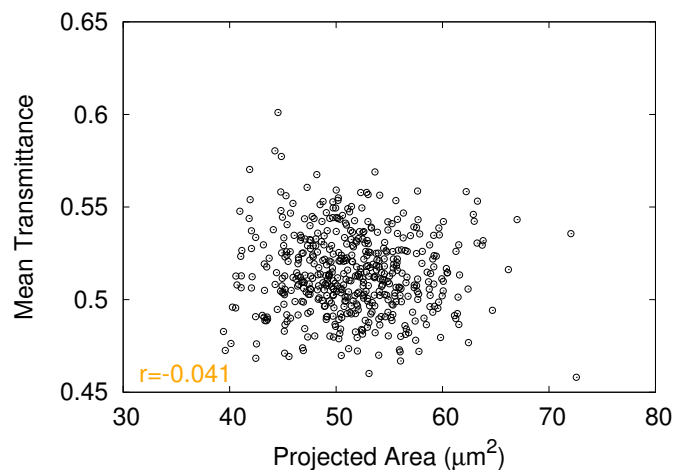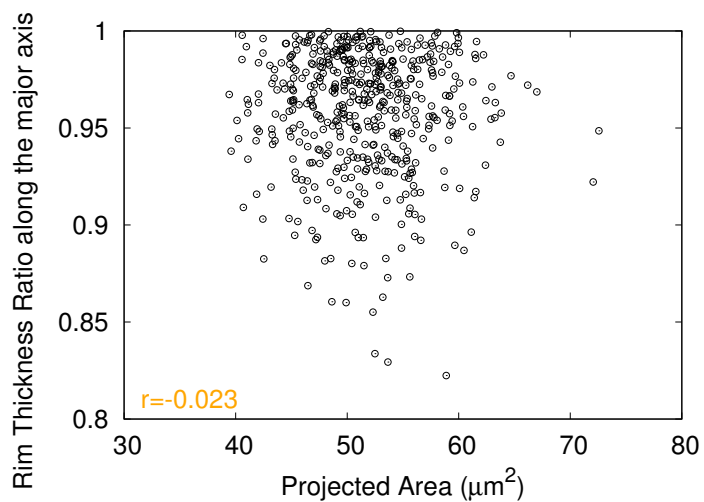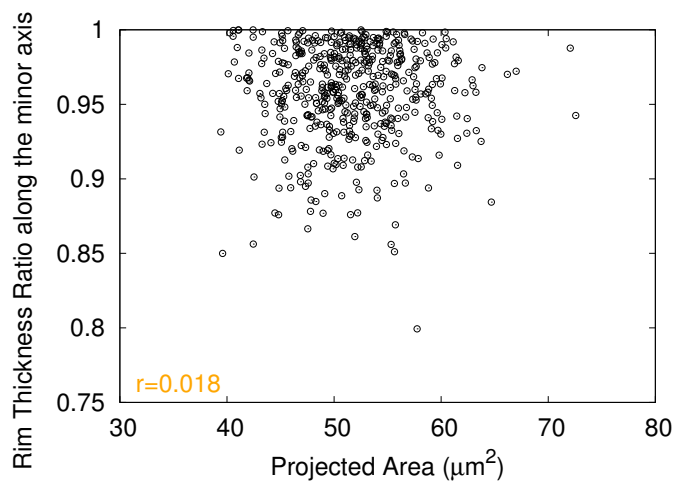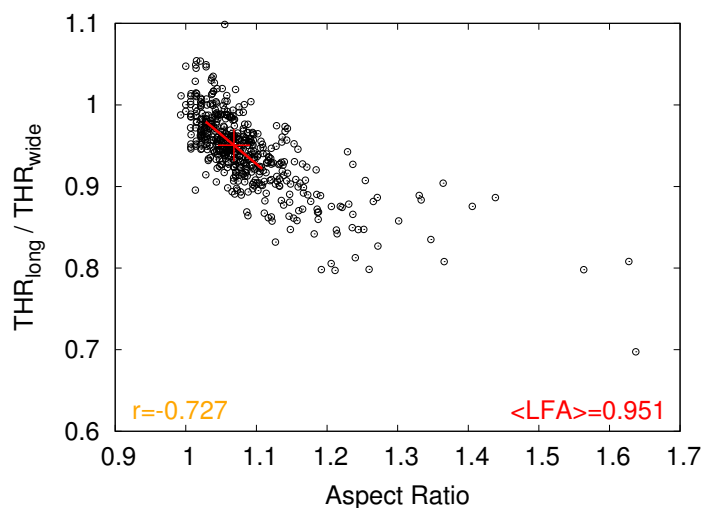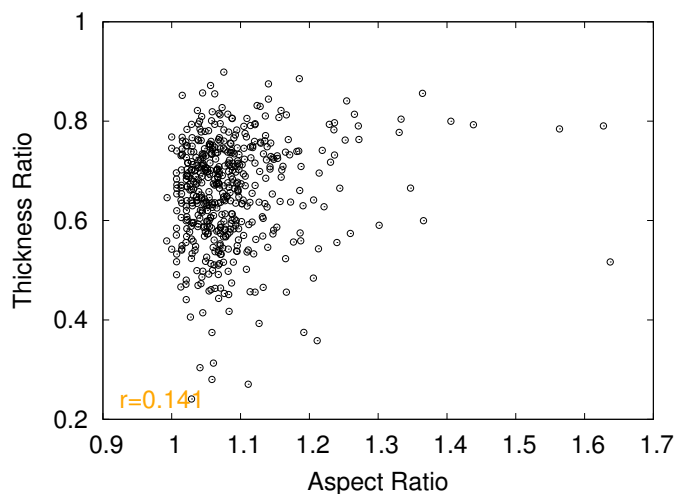

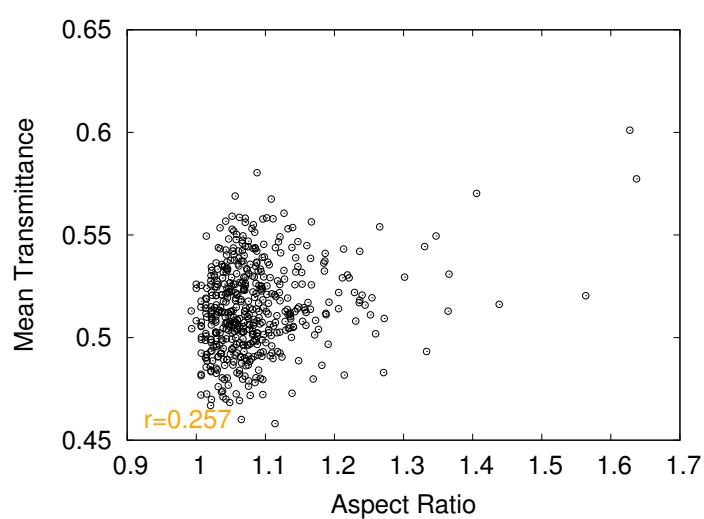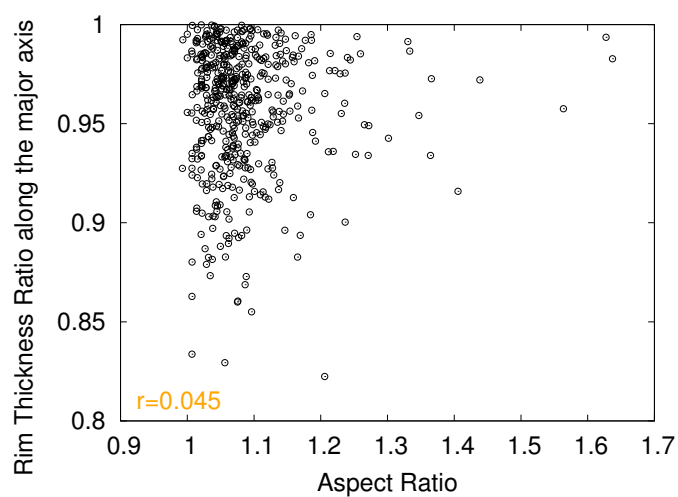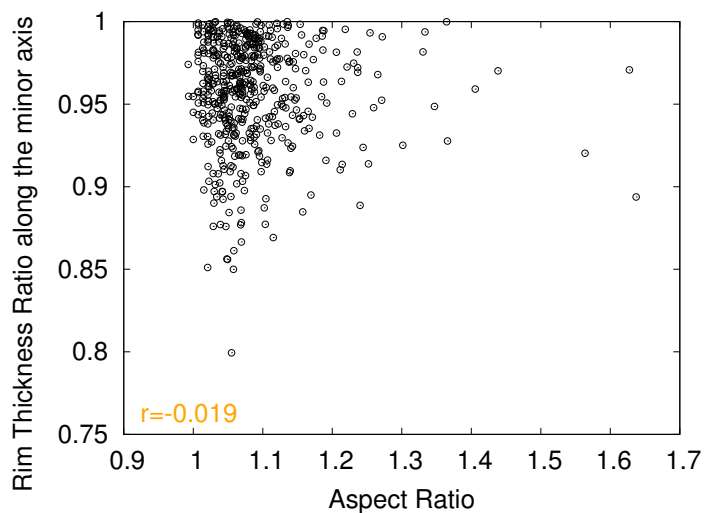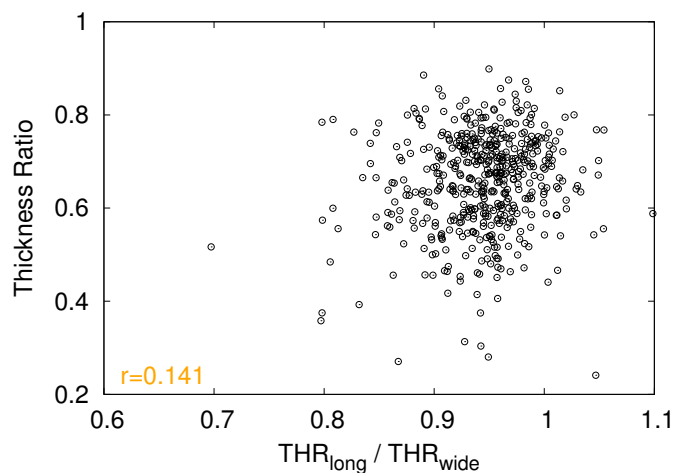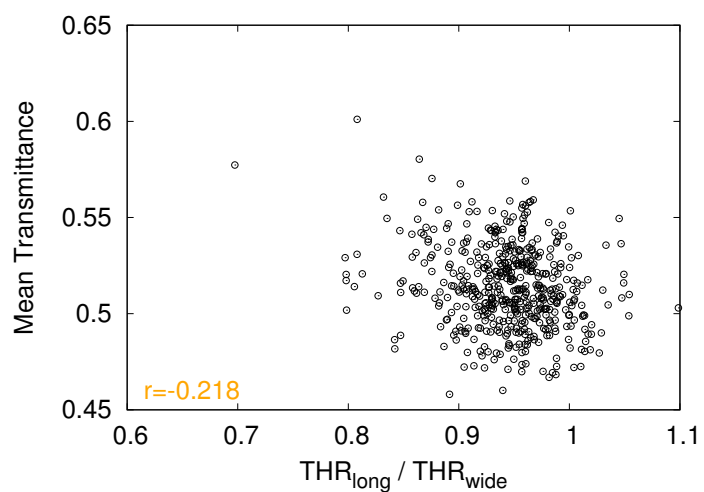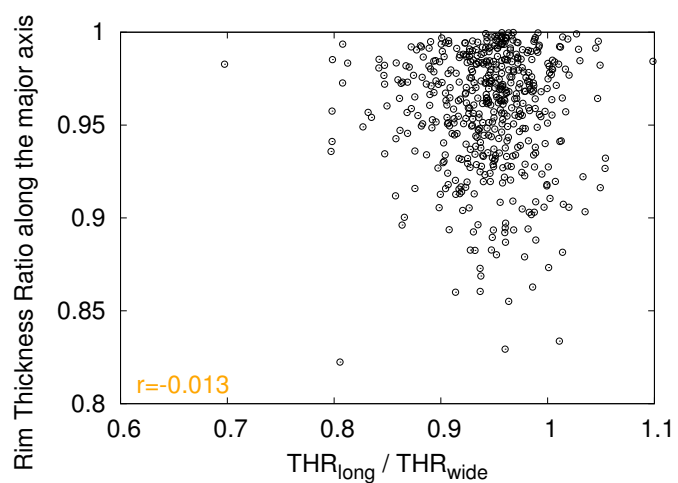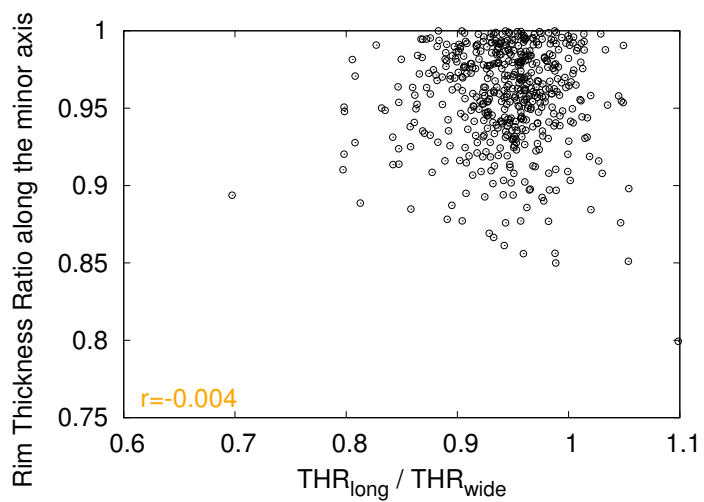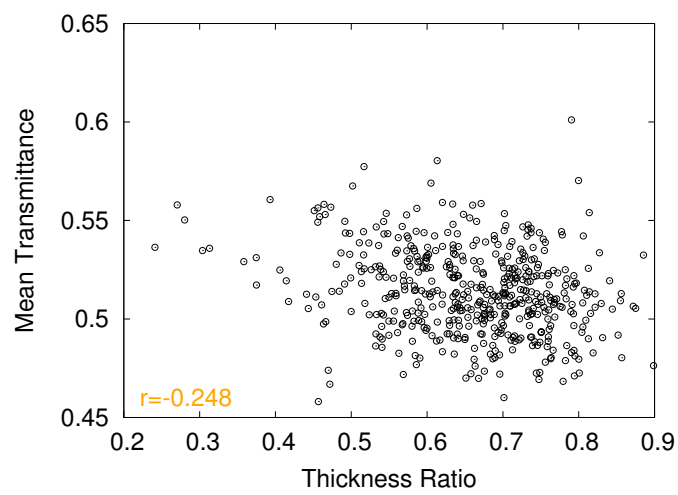

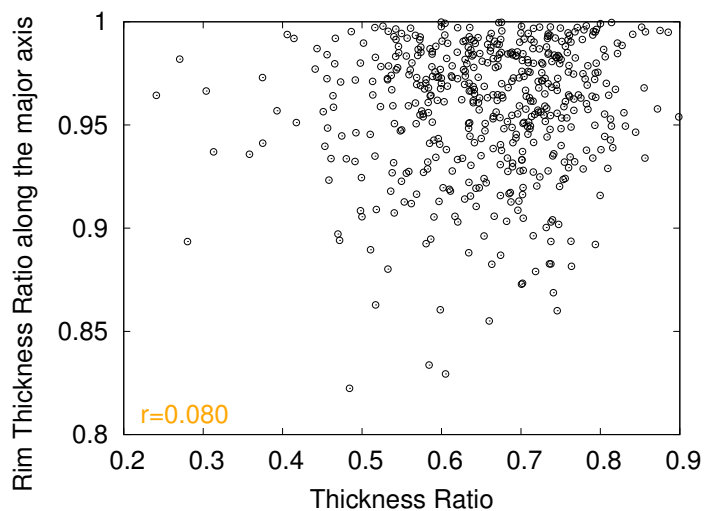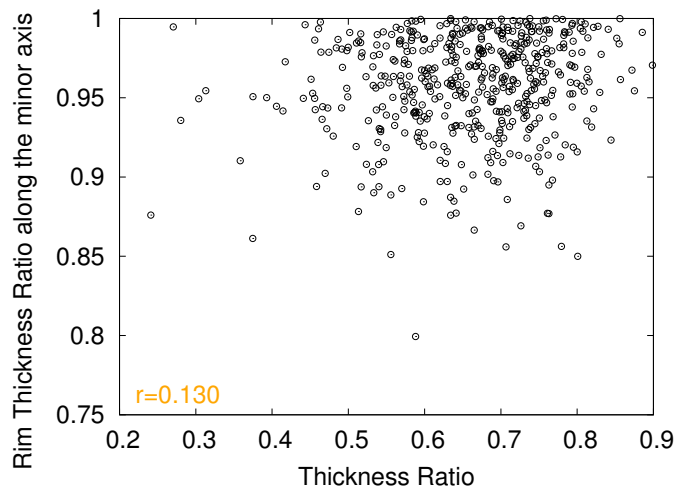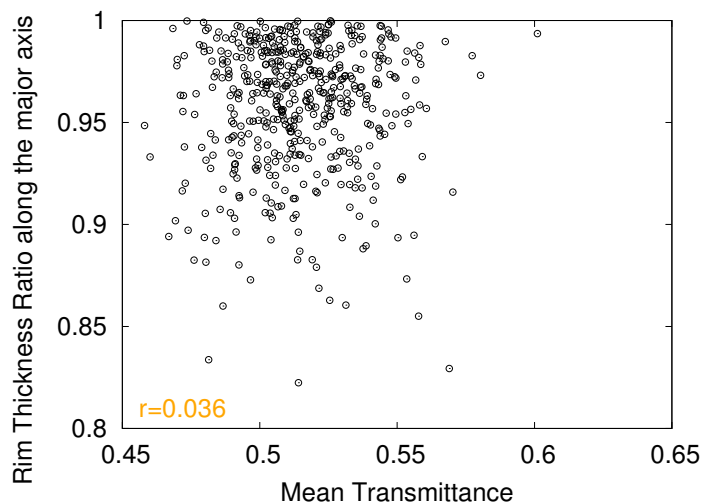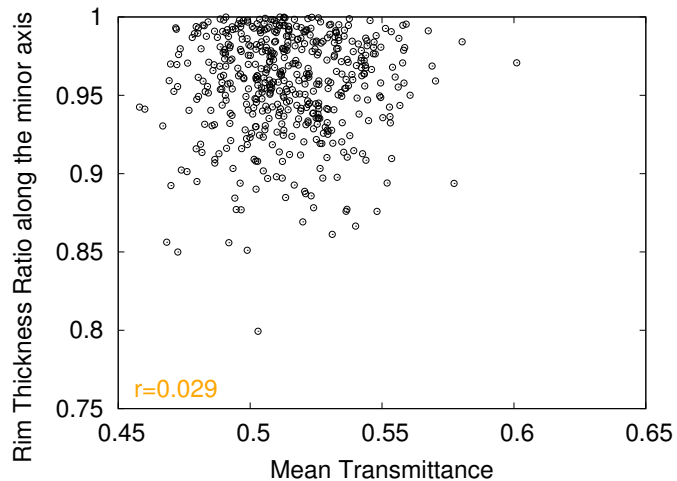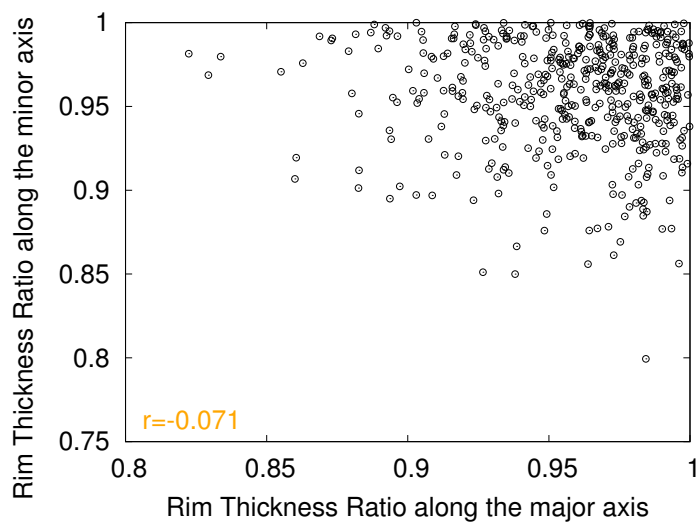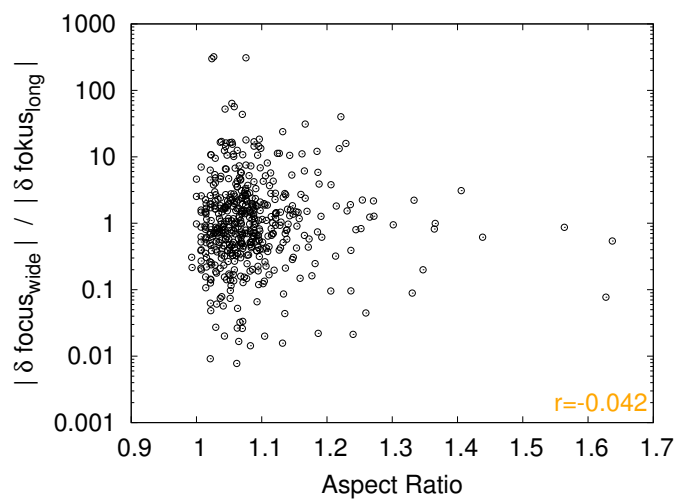

10  $\mu\text{m}$

0362 ob

0837 10499

0352 ob

0664 ob



## Donor 3, serum

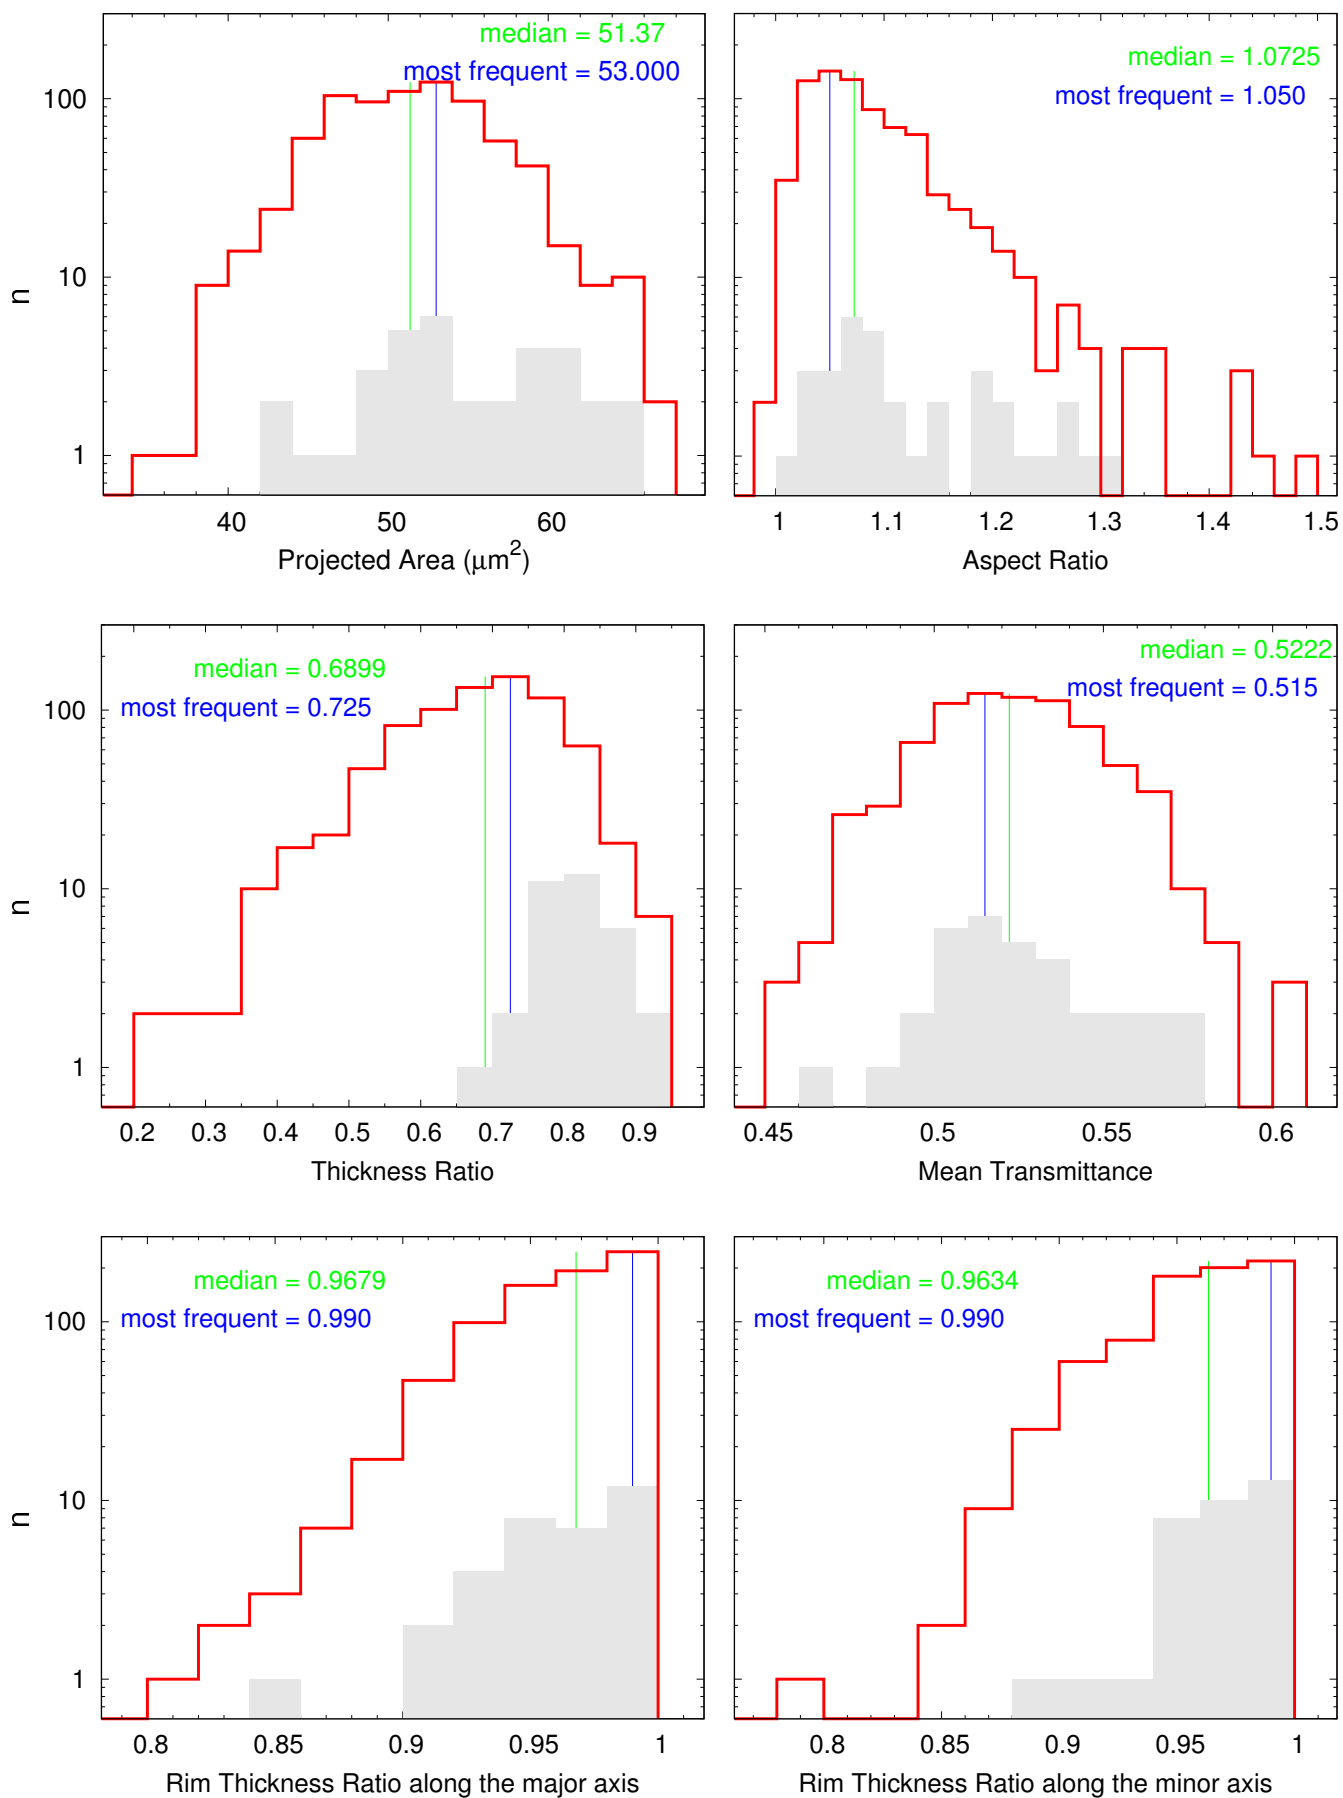

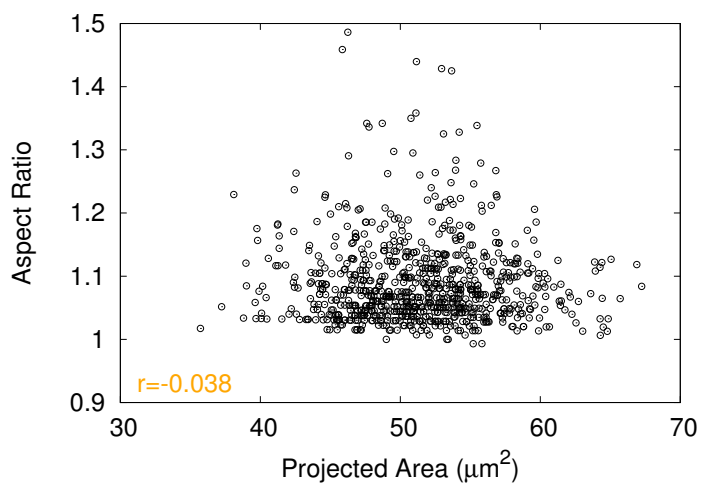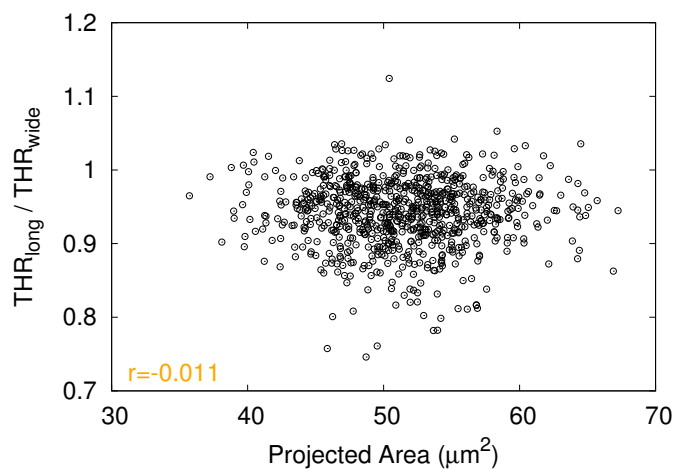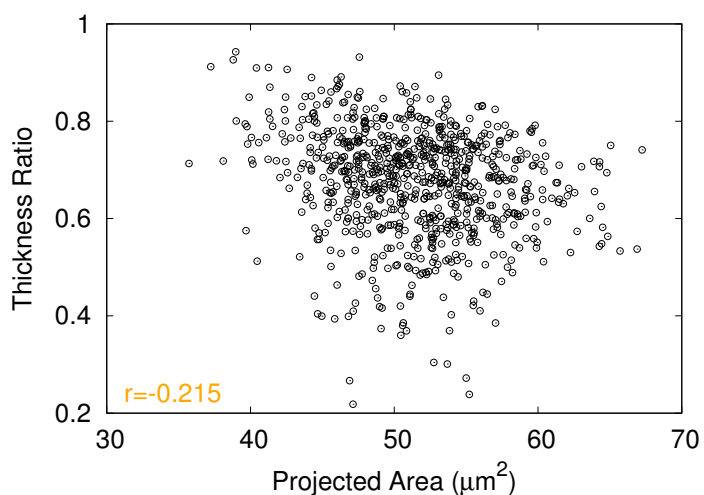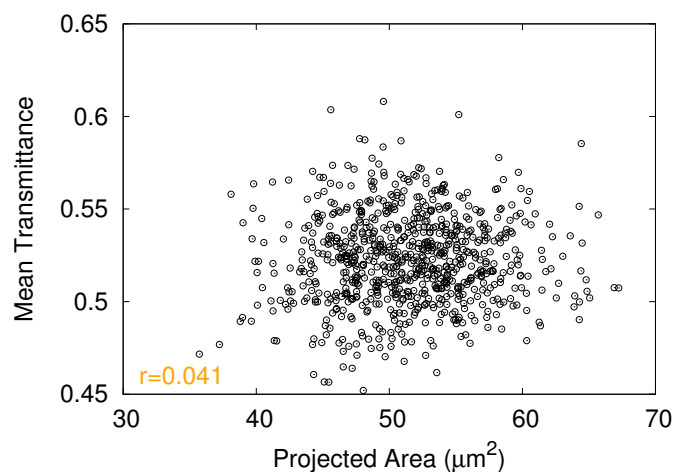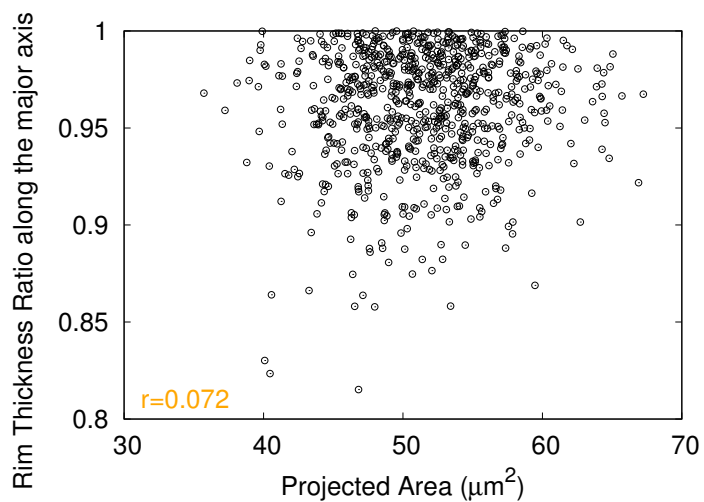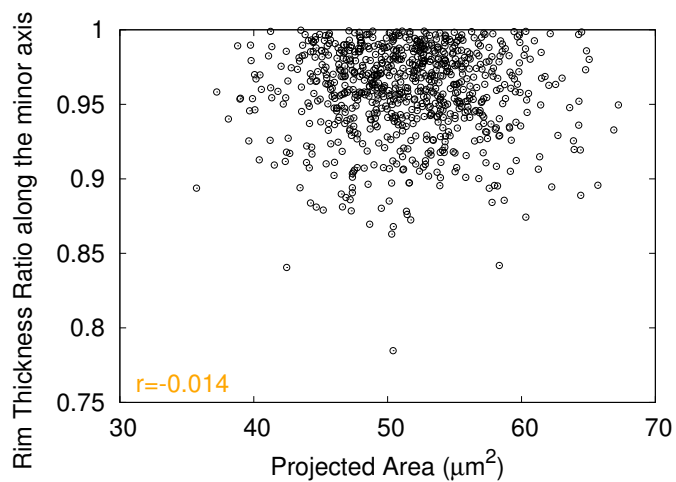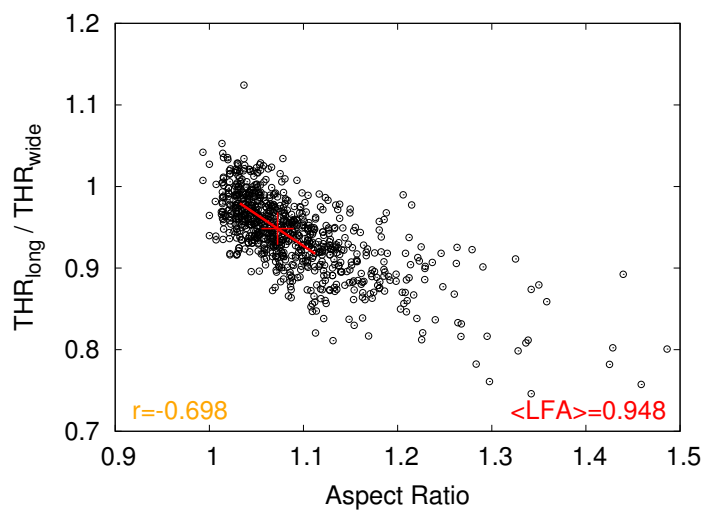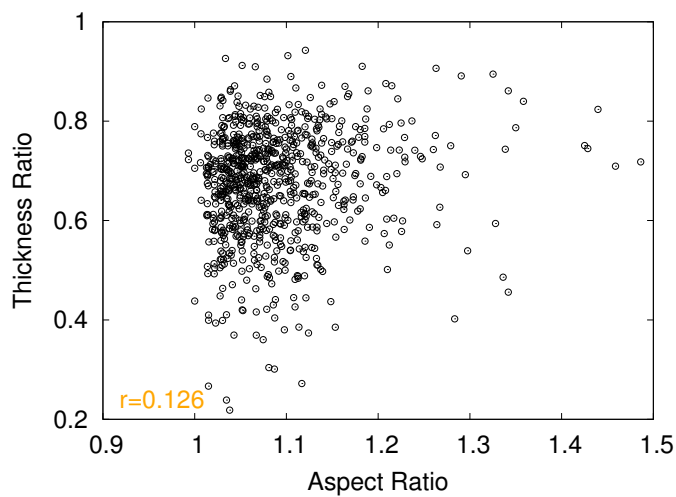

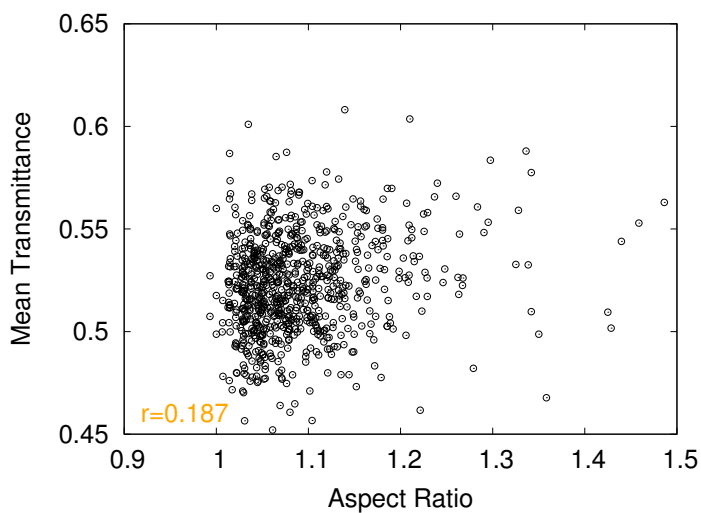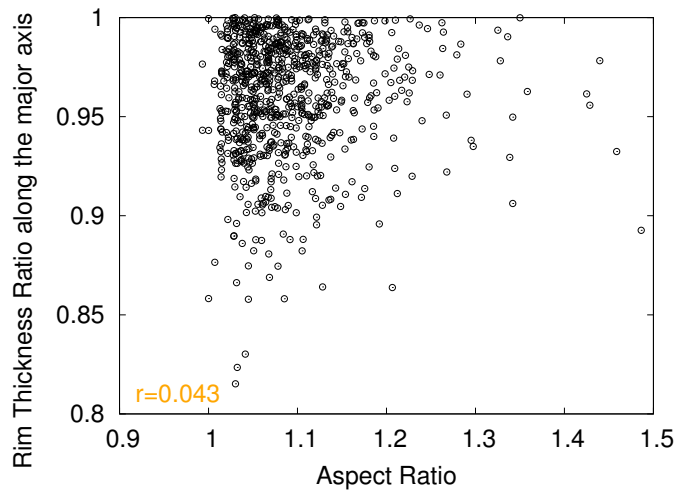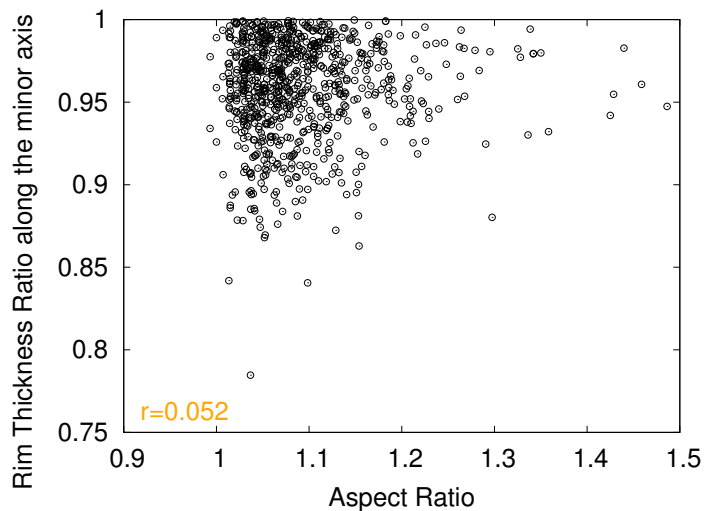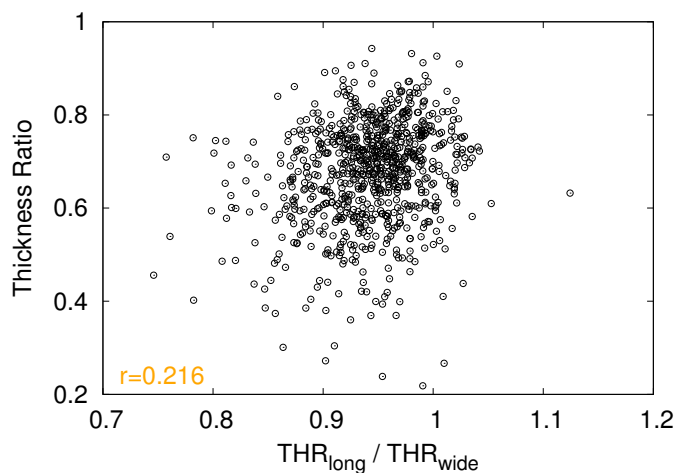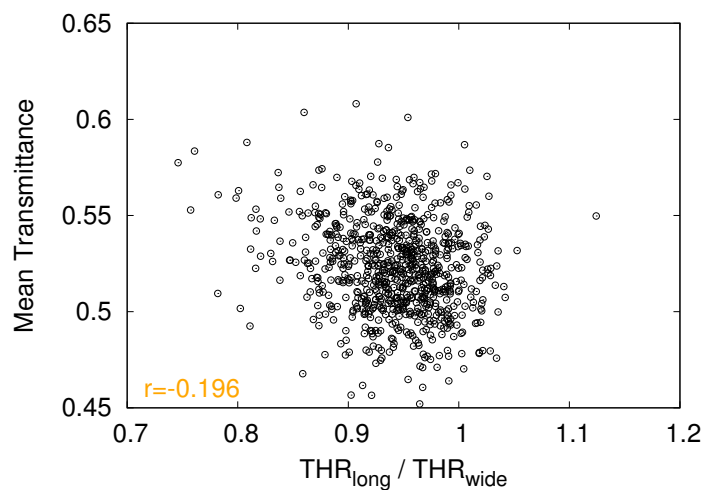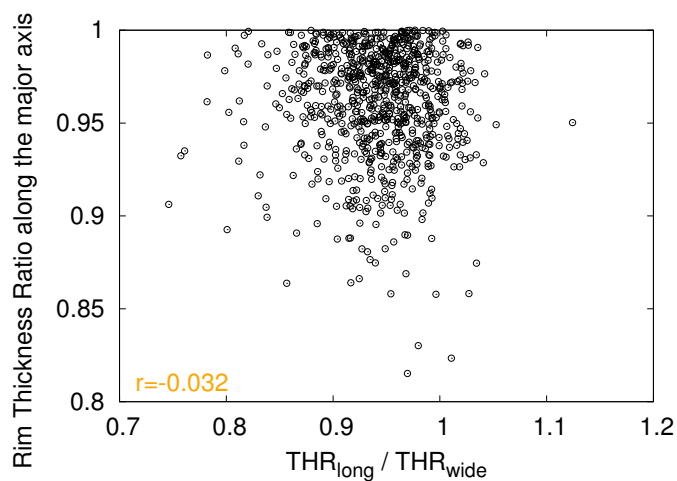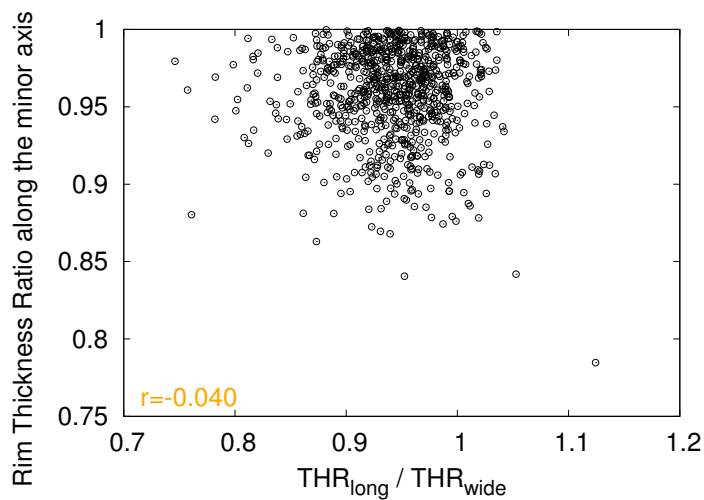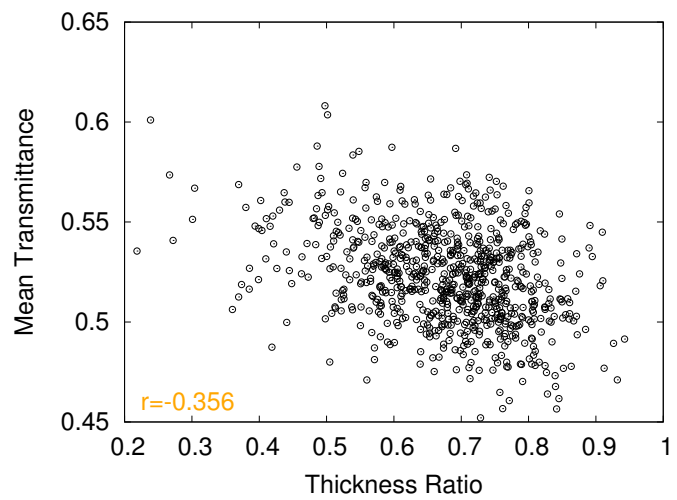

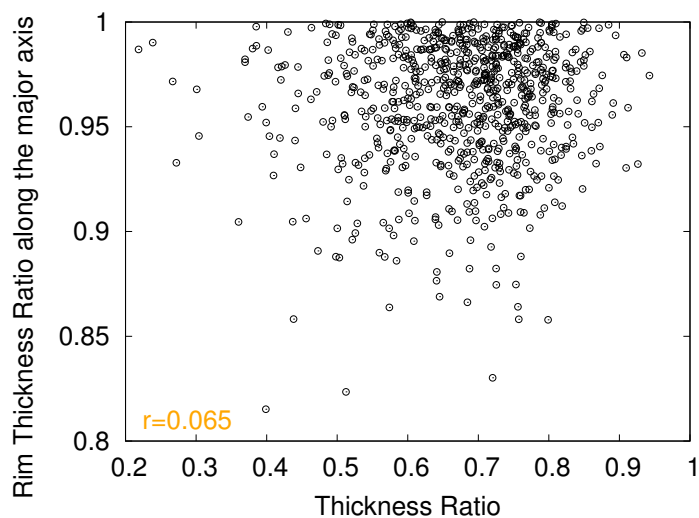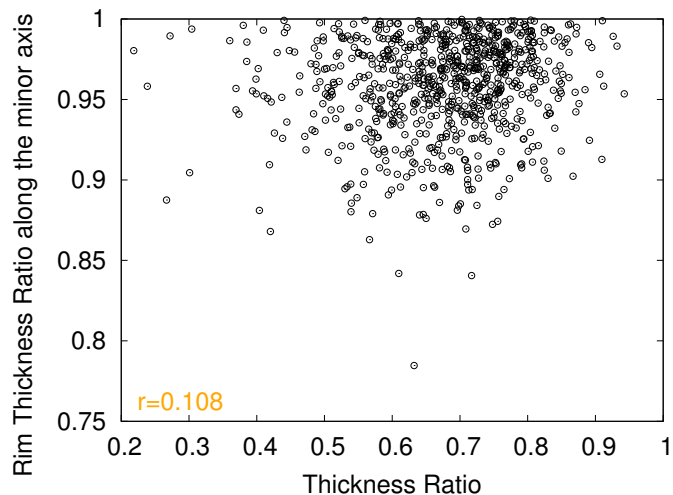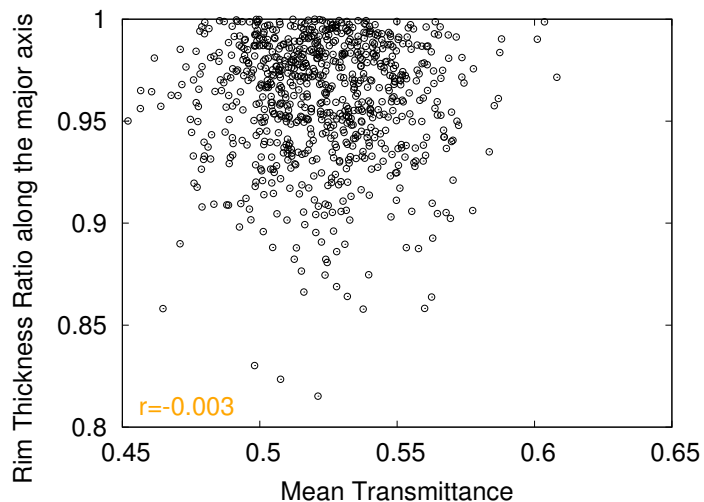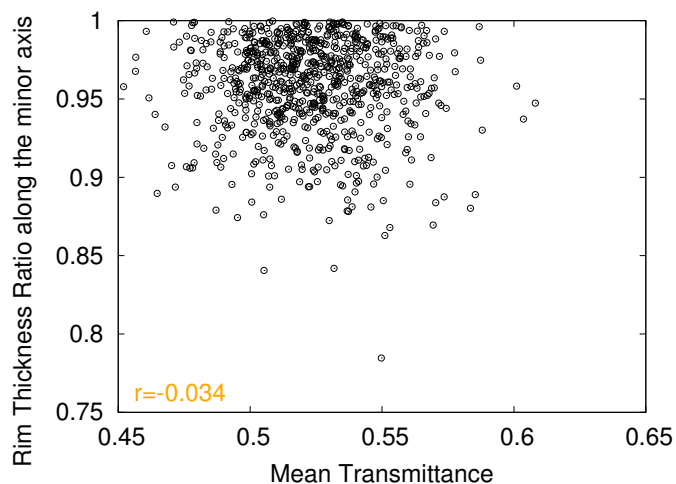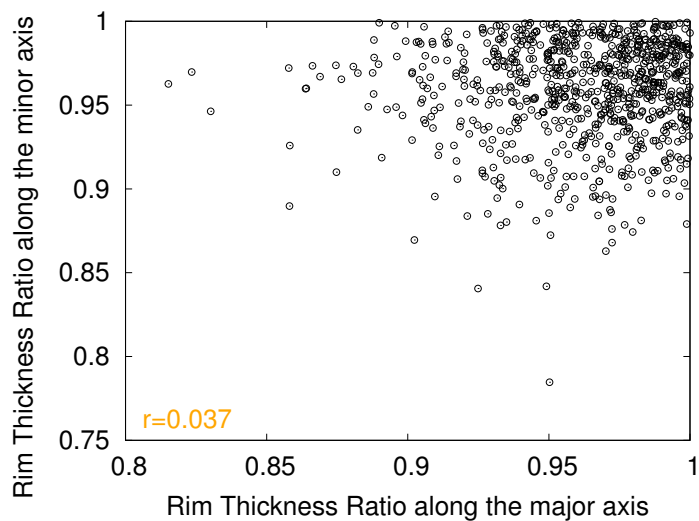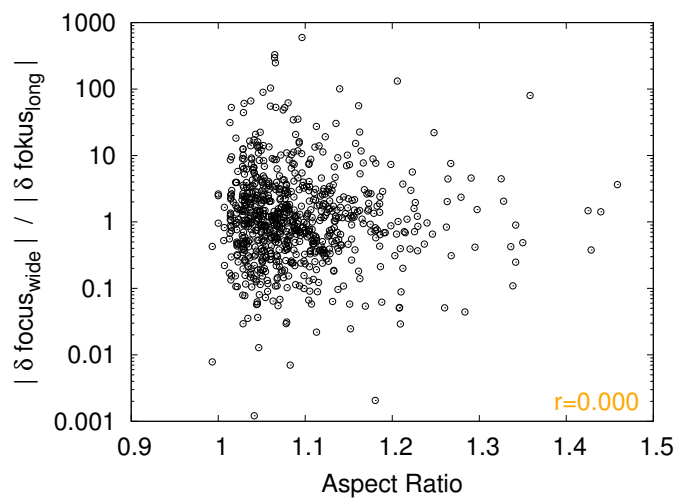

10  $\mu\text{m}$

1302 162

0680 0.7522

0905 13038

## Donor 3, serum washed

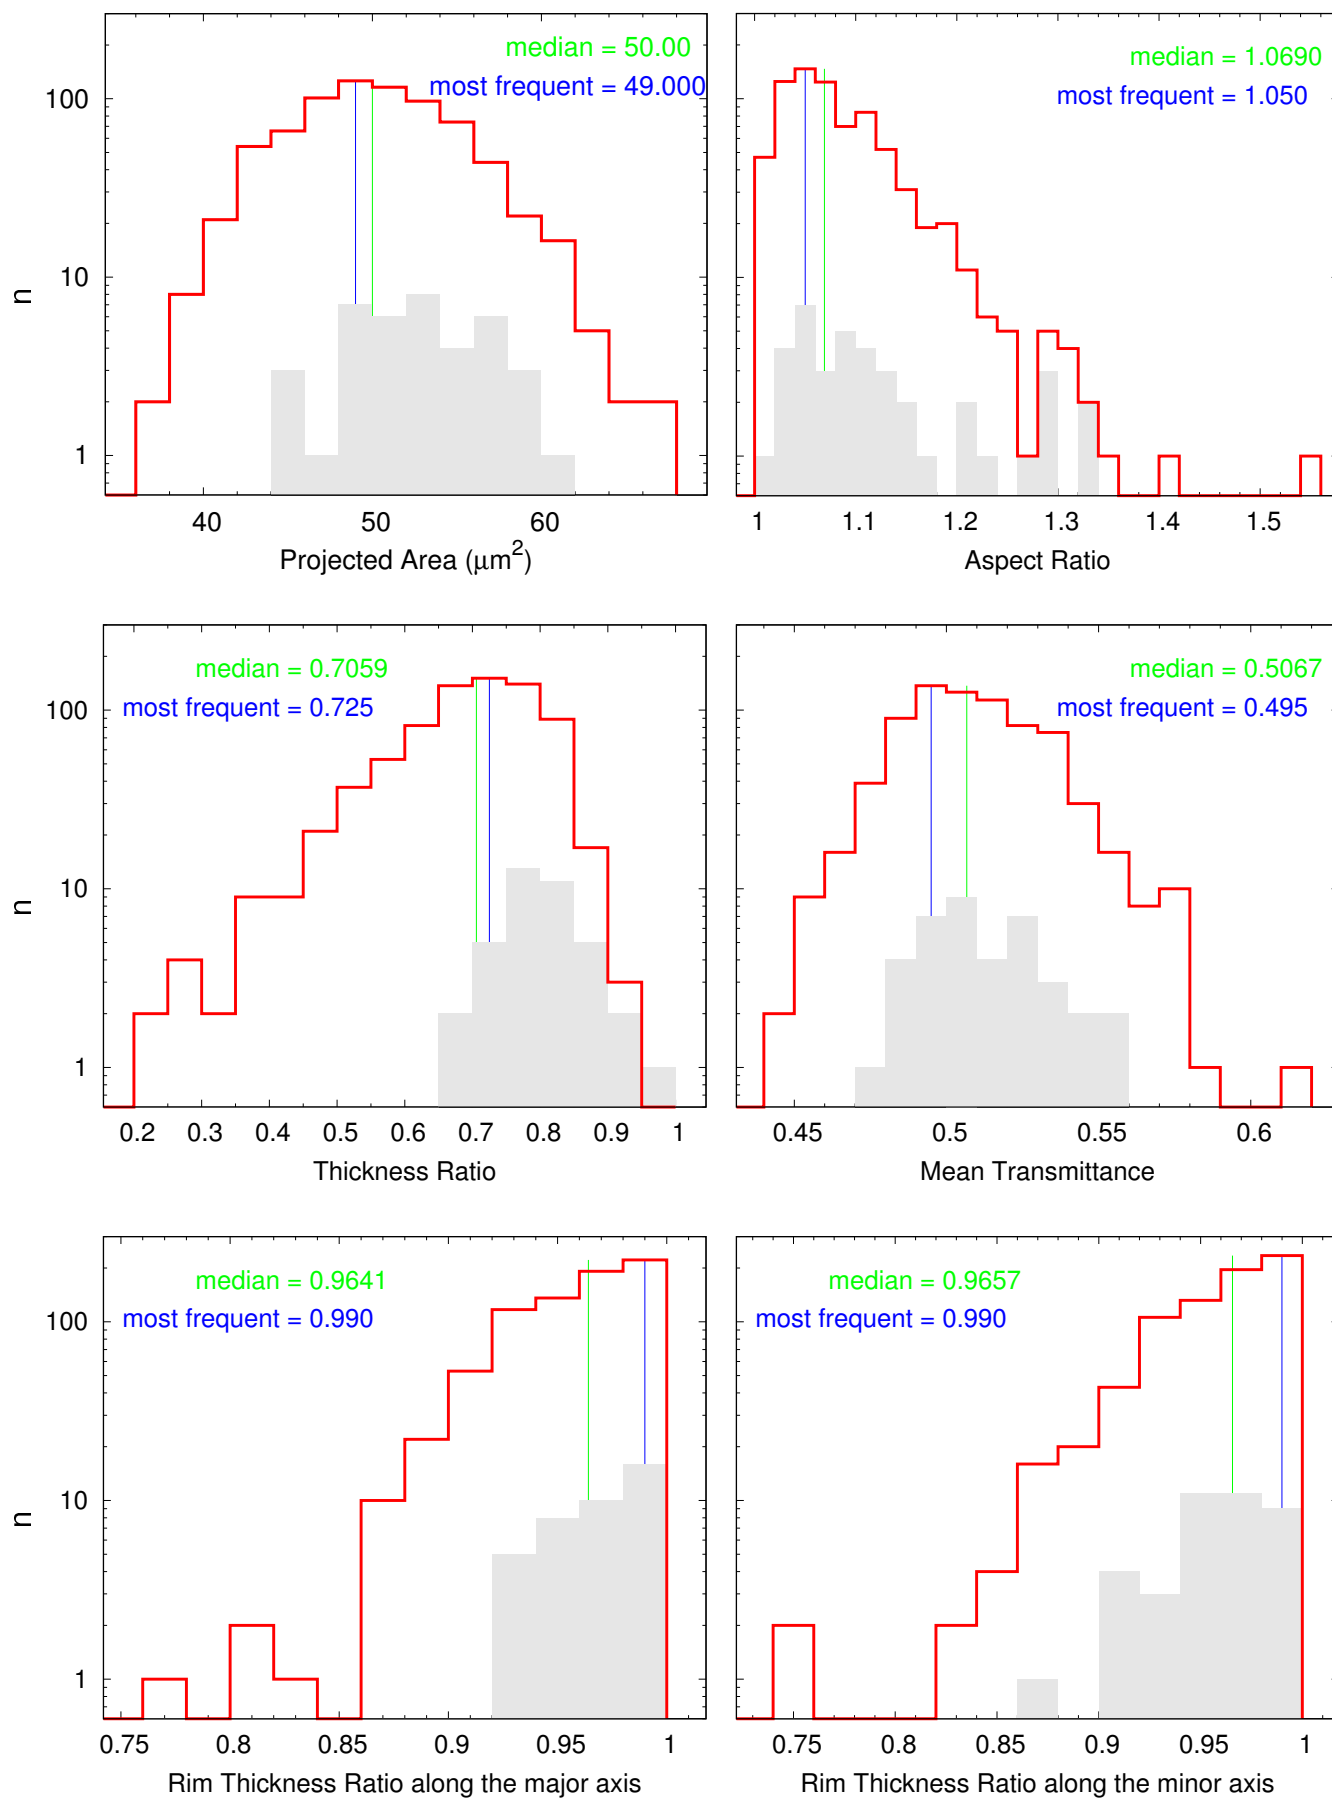

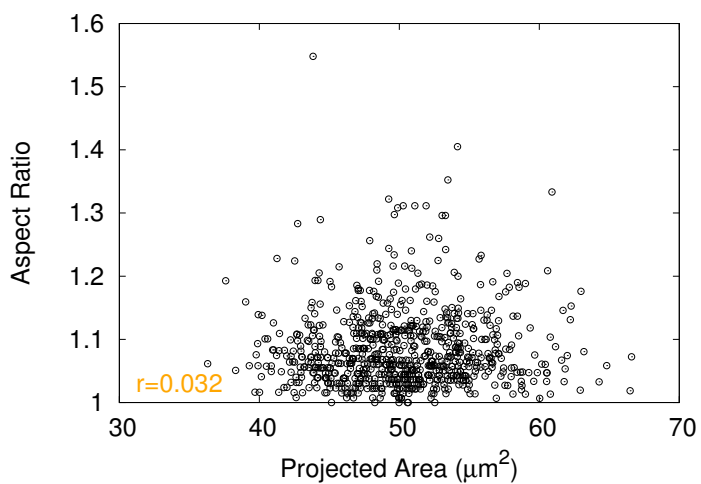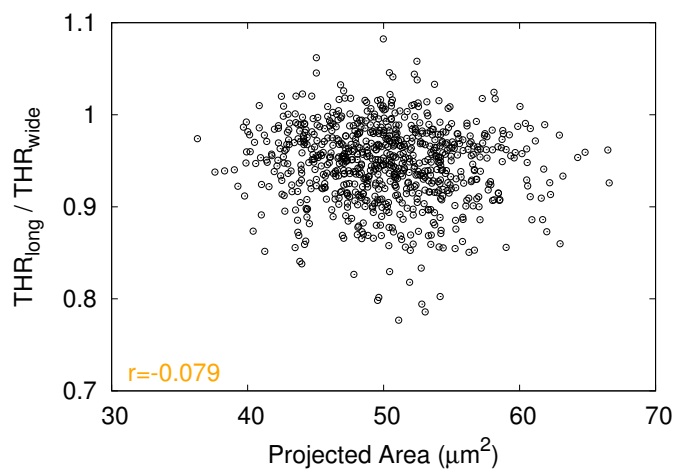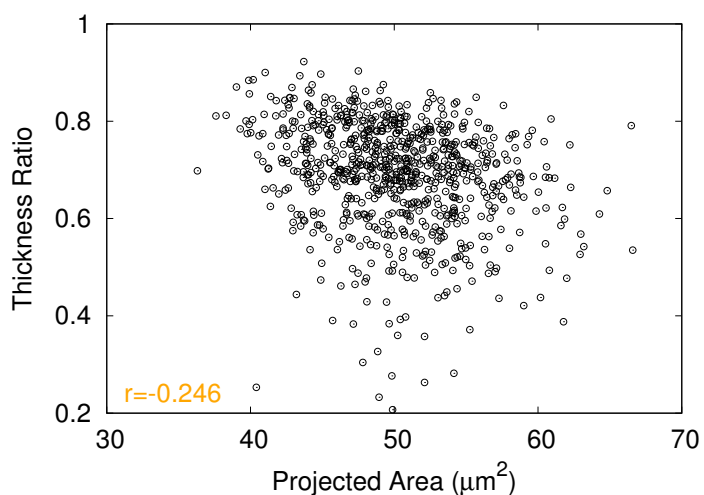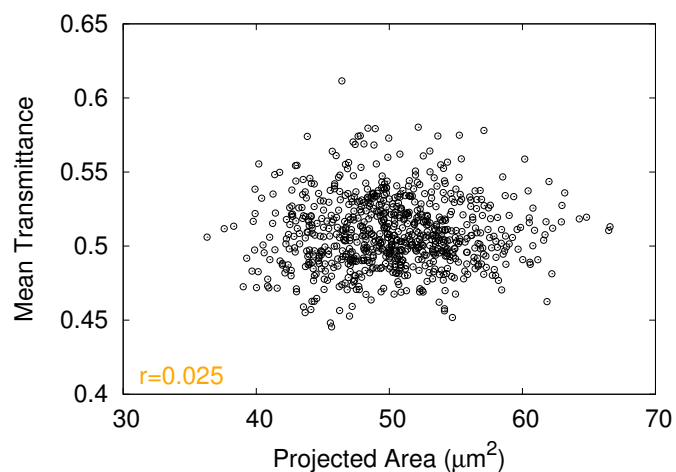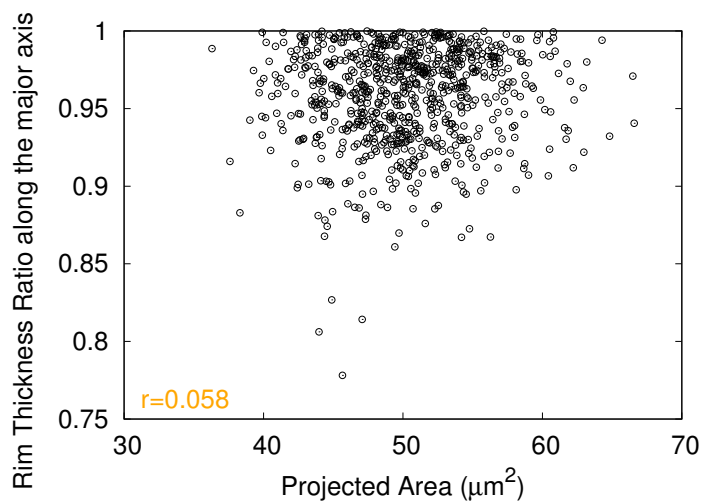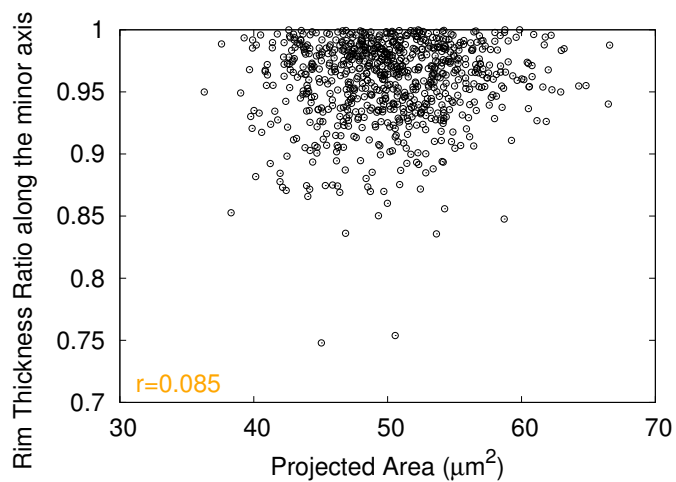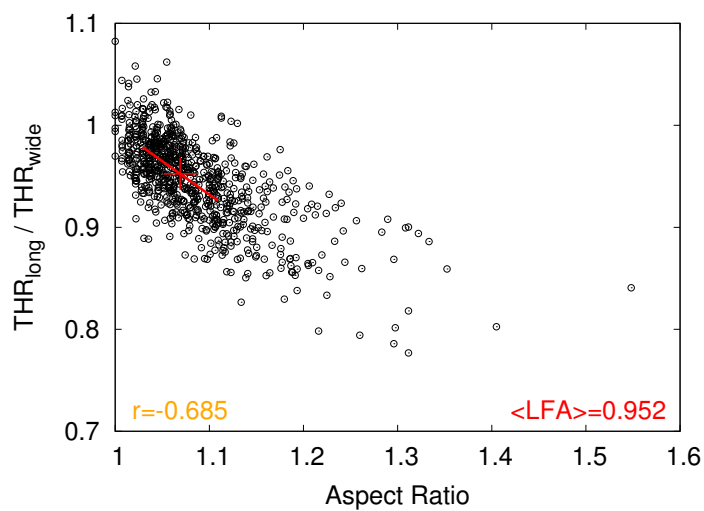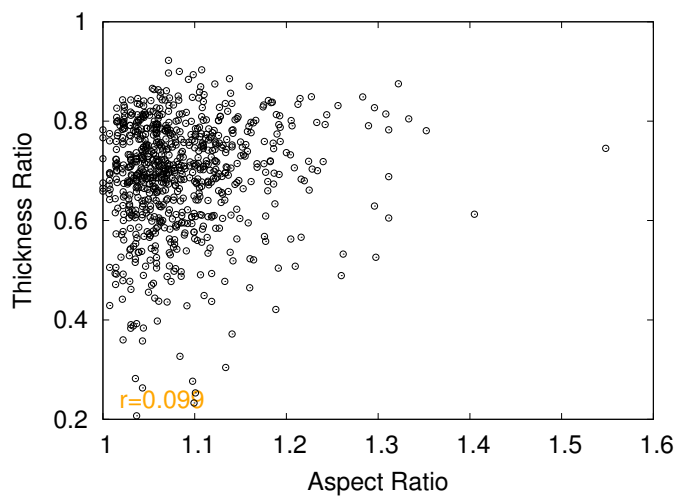



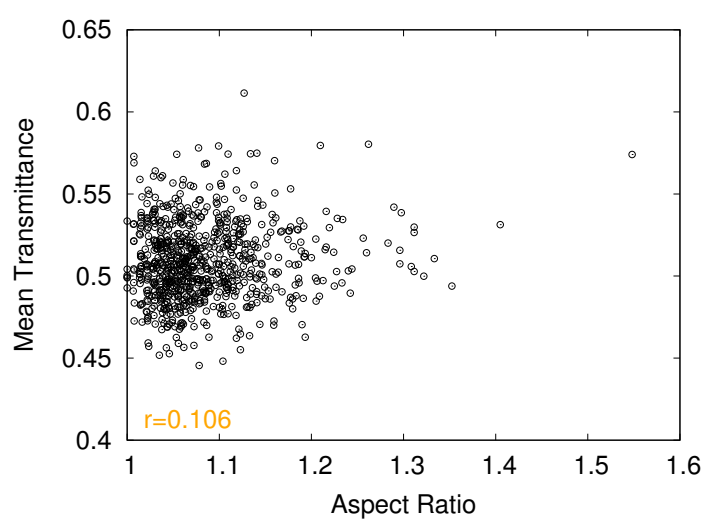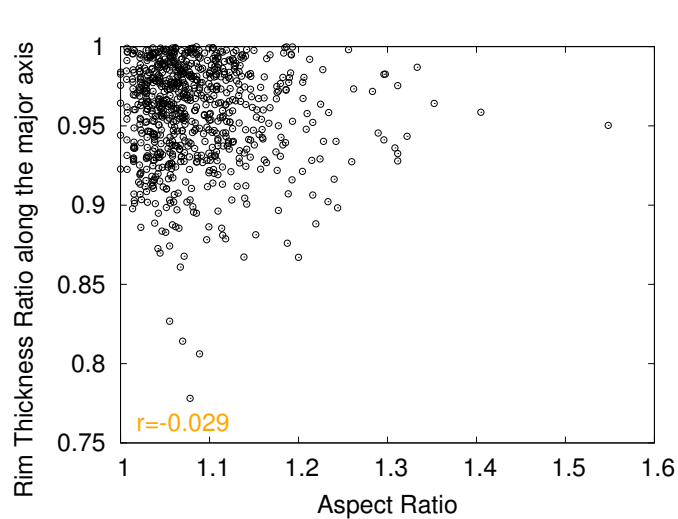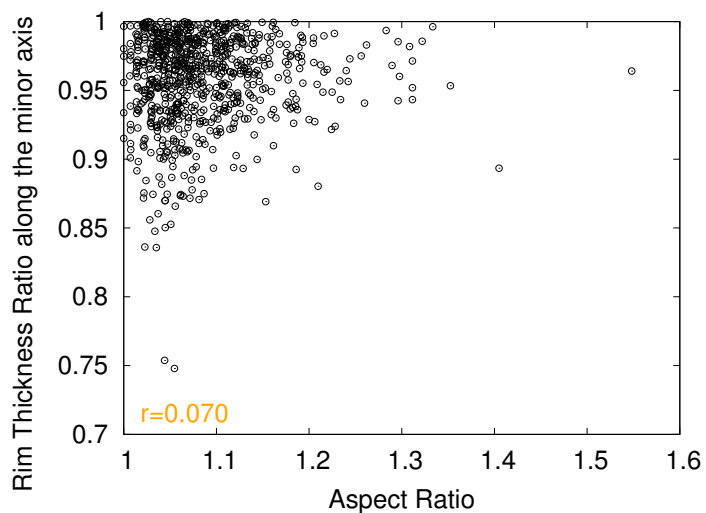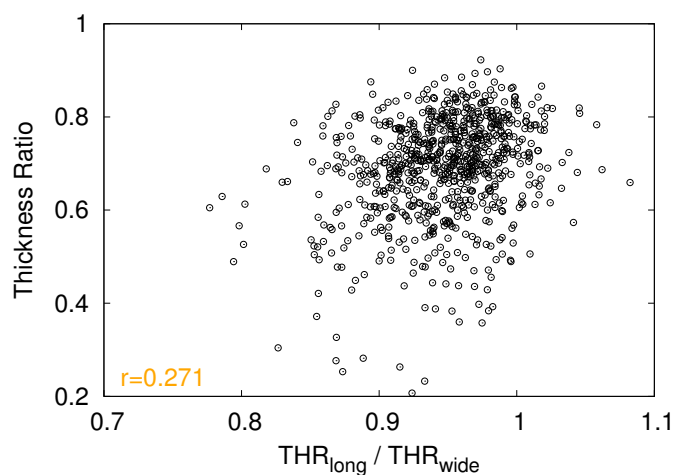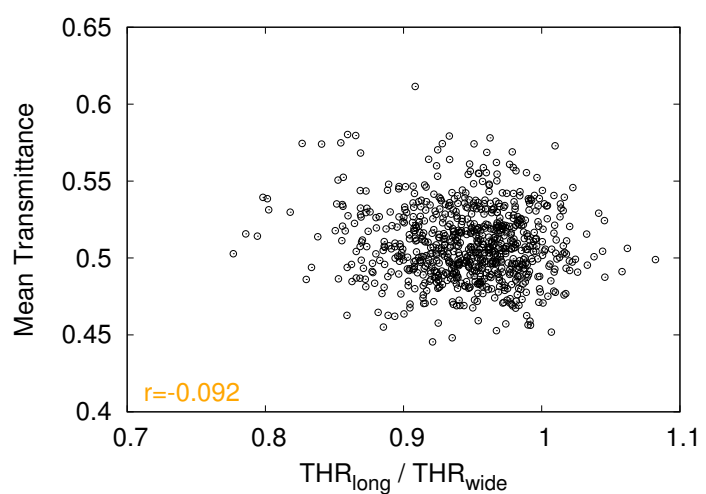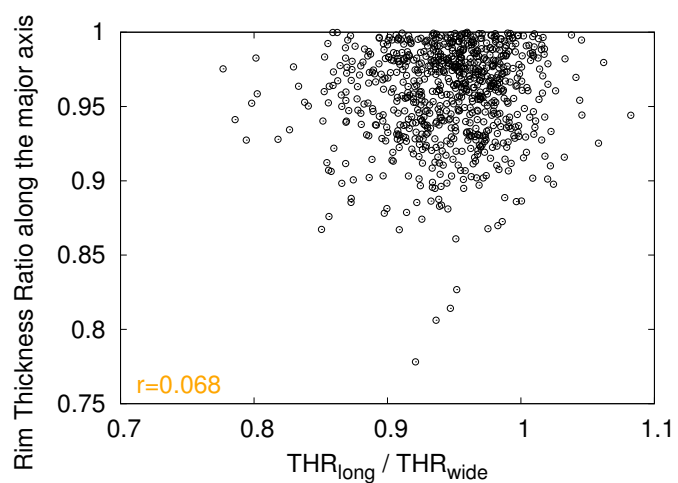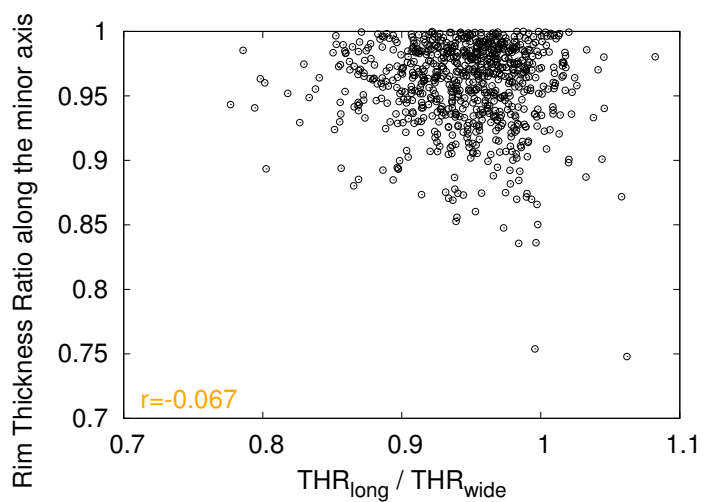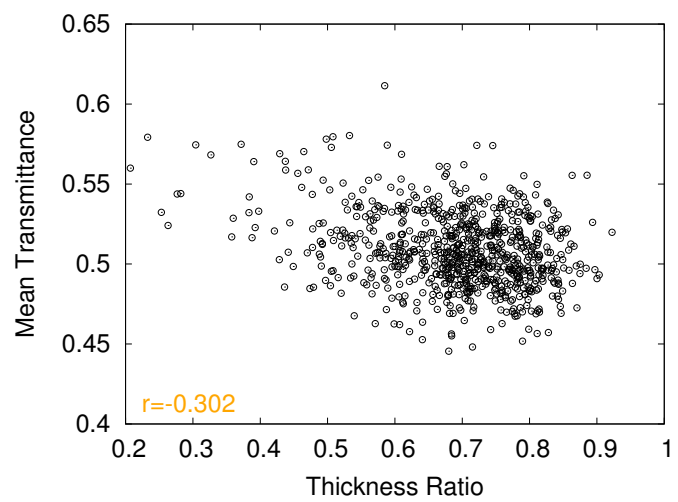

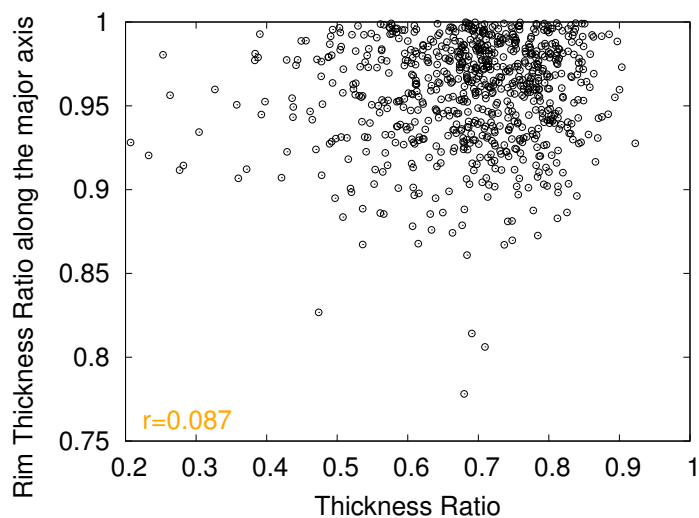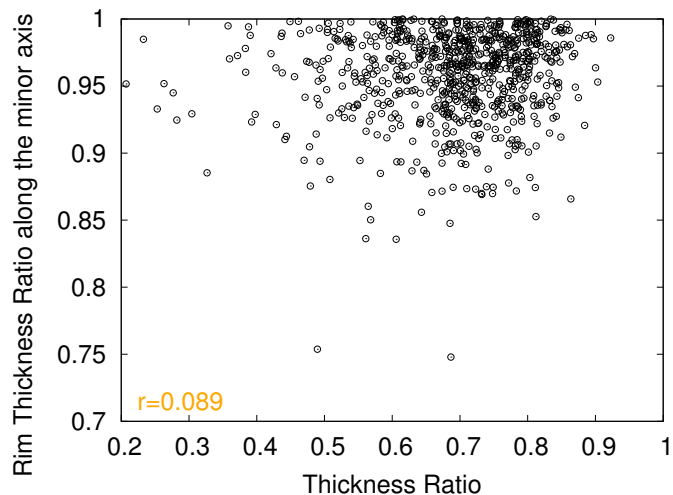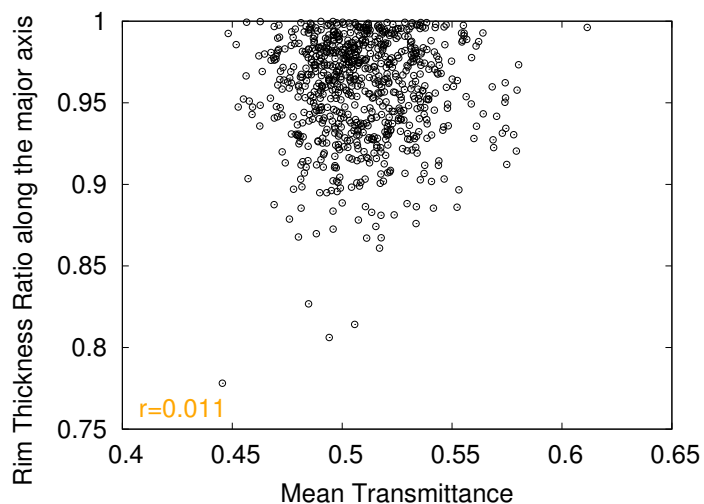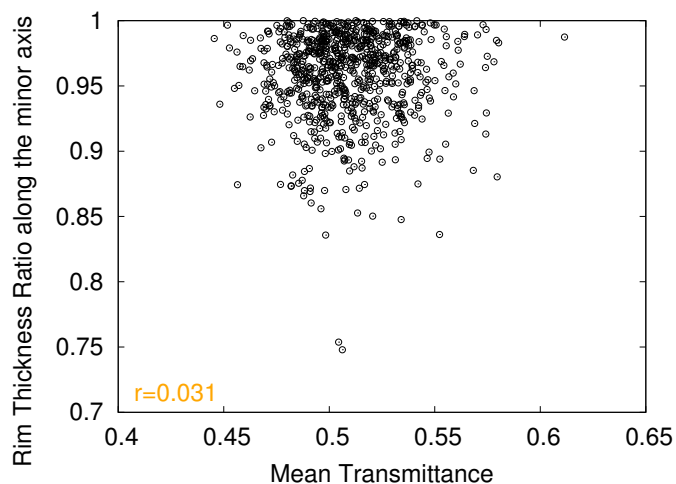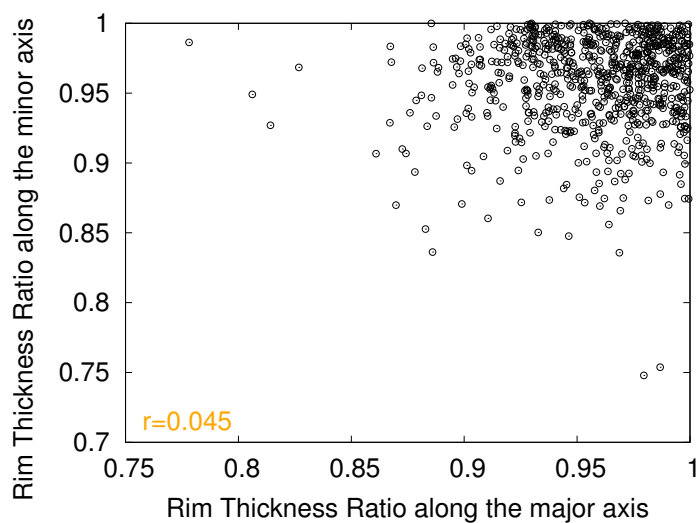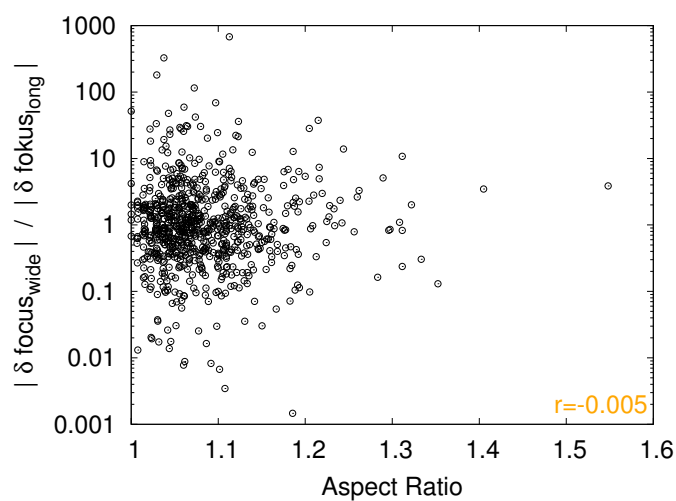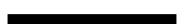

10  $\mu\text{m}$

0997 108

1145 136

1258 161

0082 1.4581

0096 008

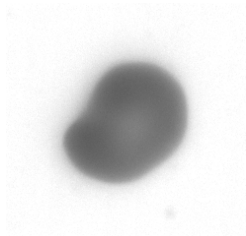

0113 0.8897

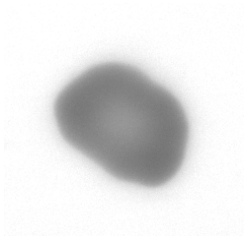

0191 017

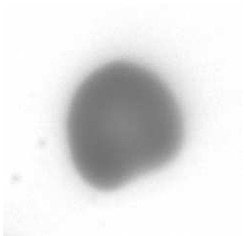

0404 11876

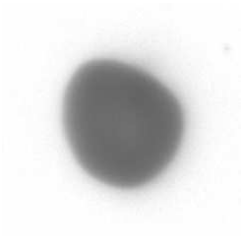

0449 12472

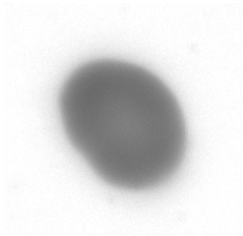

0496 0.6632

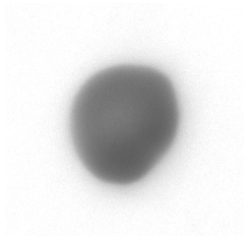

1166 140

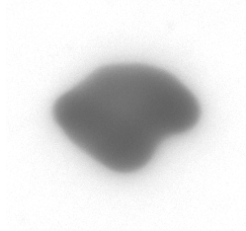

1219 152

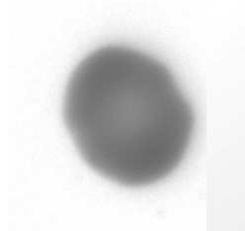

1273 0.9223

## Donor 4, plasma

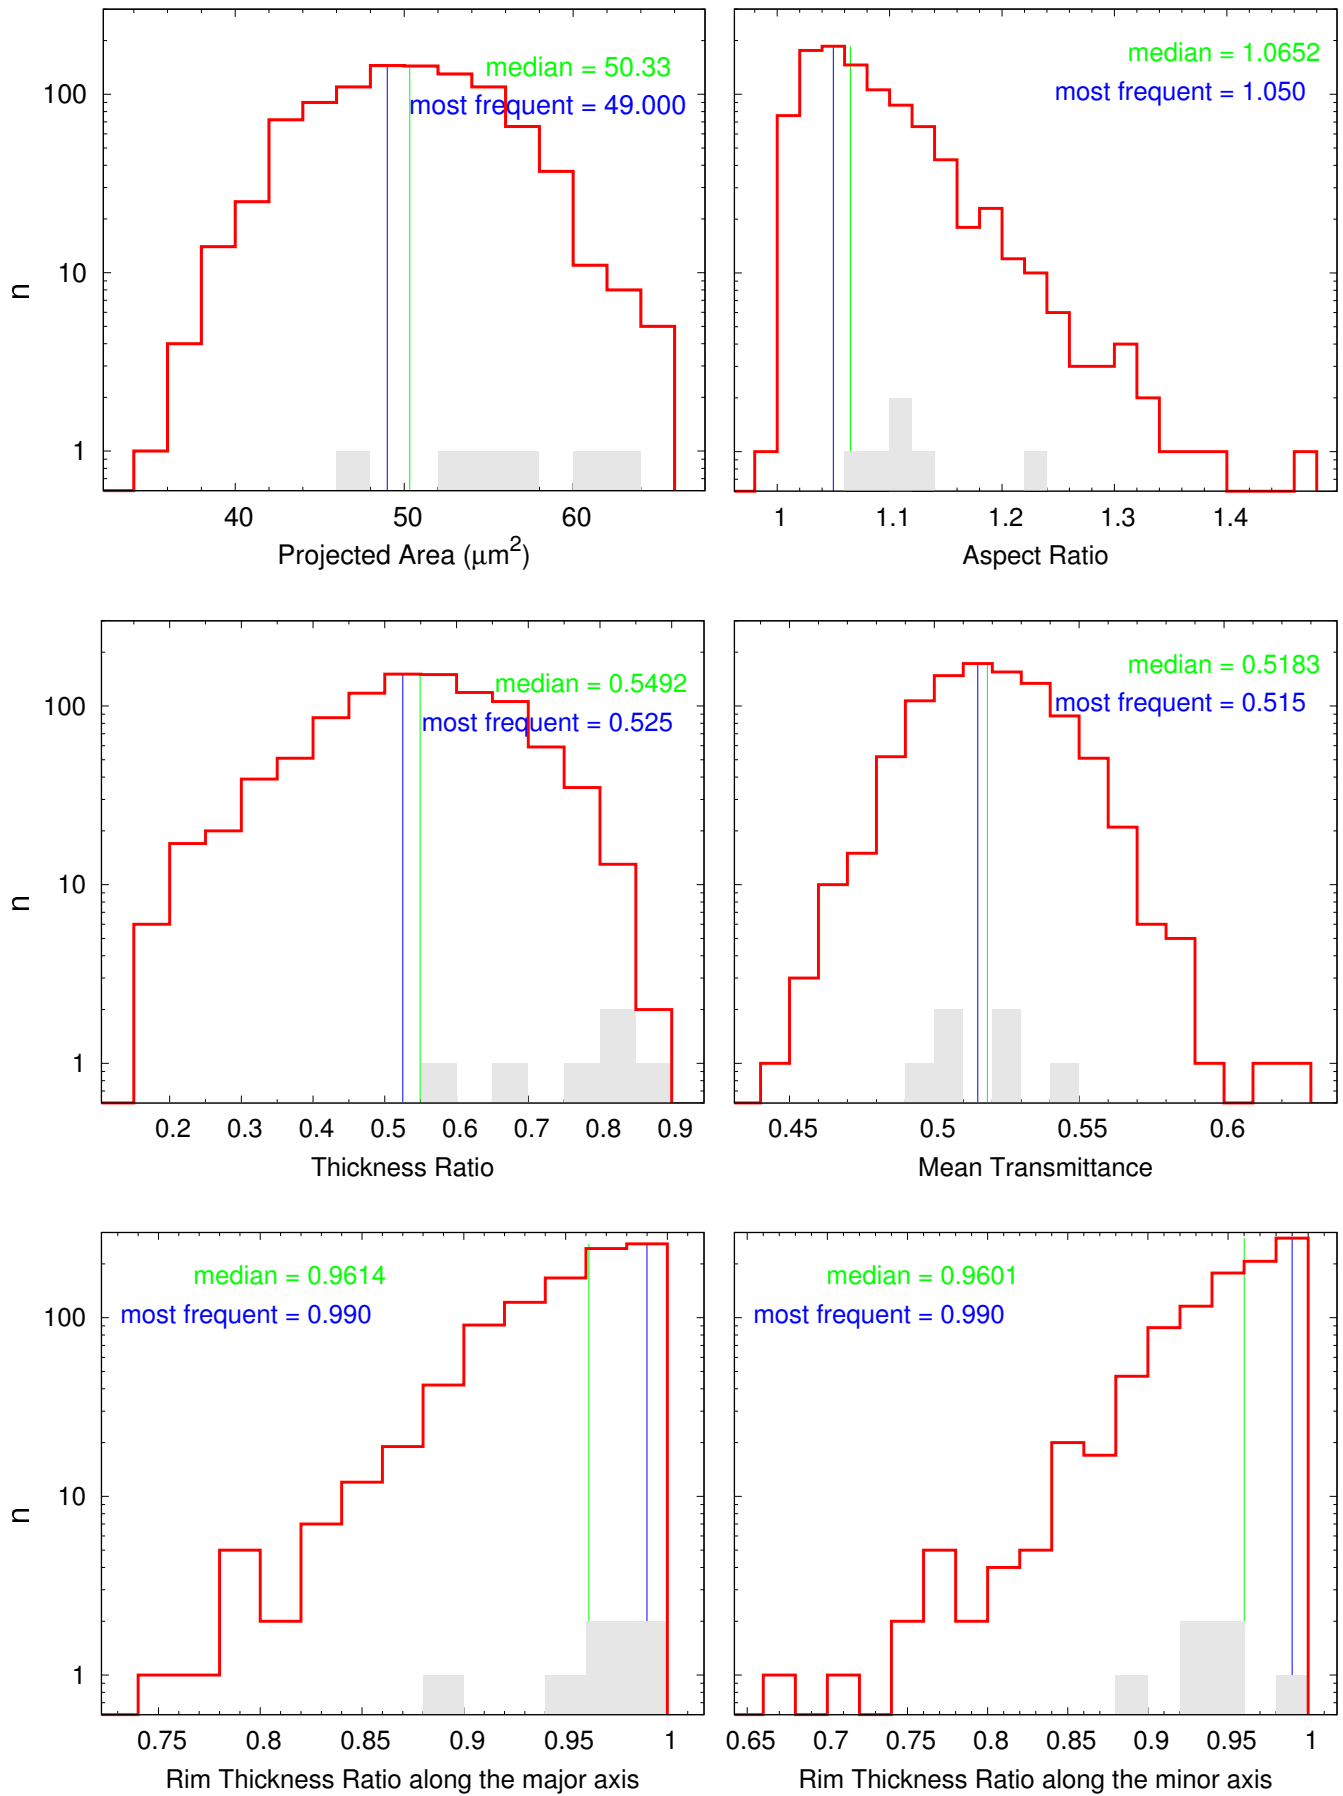

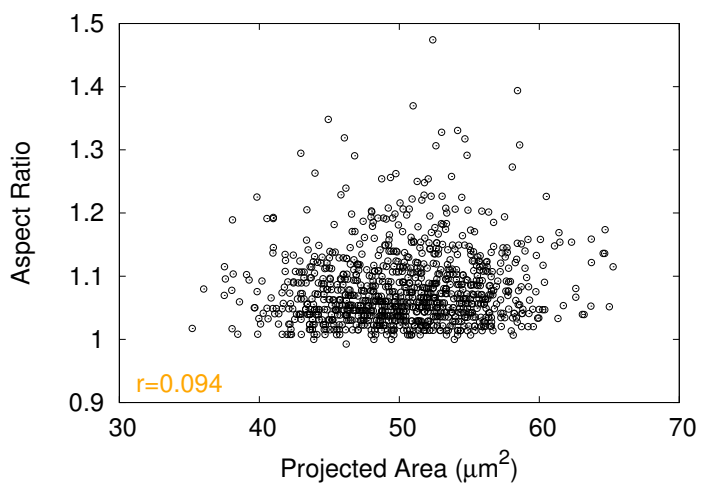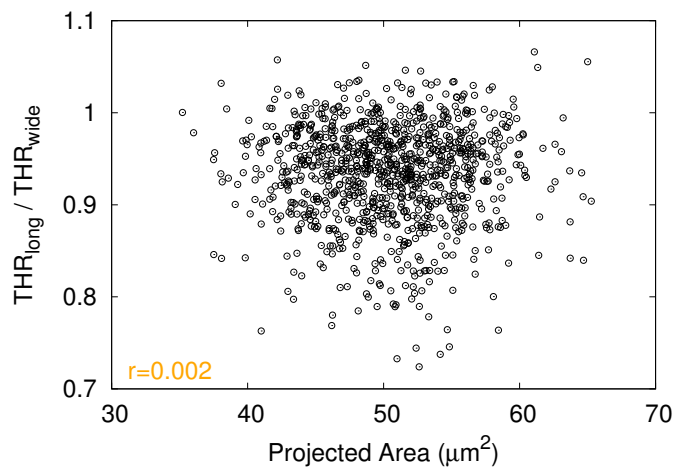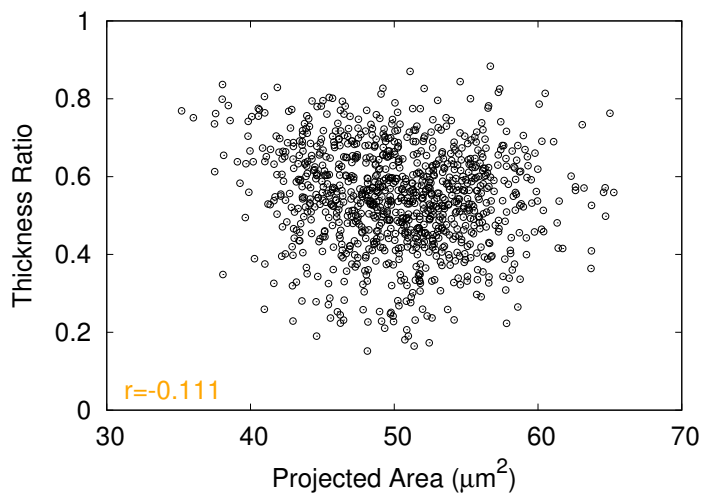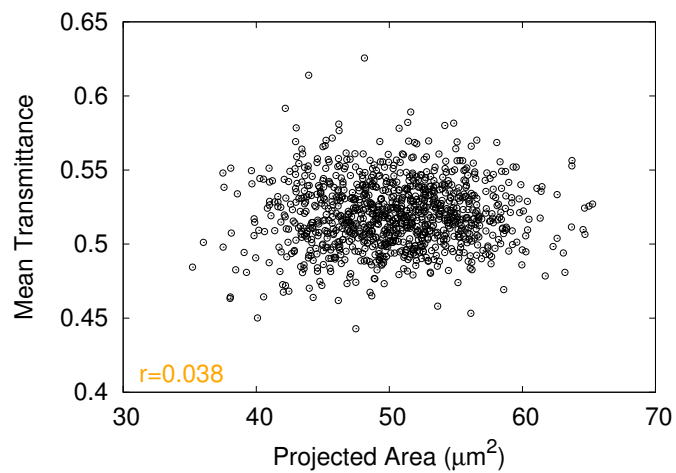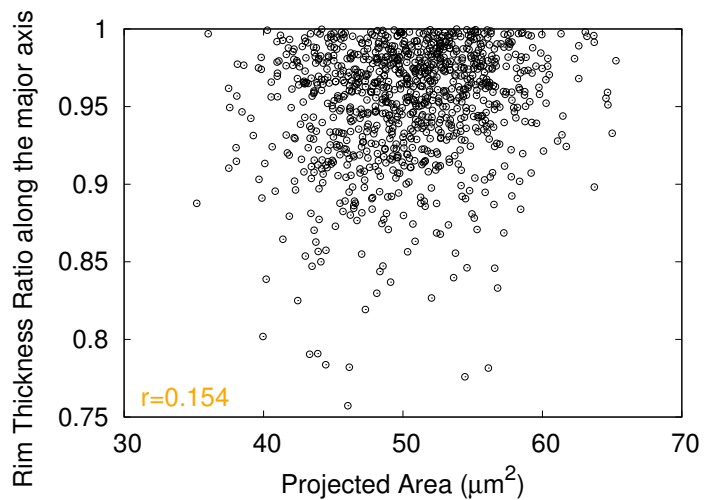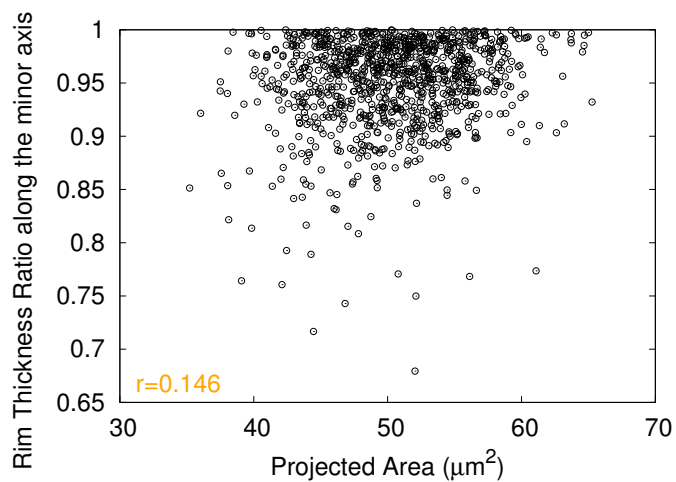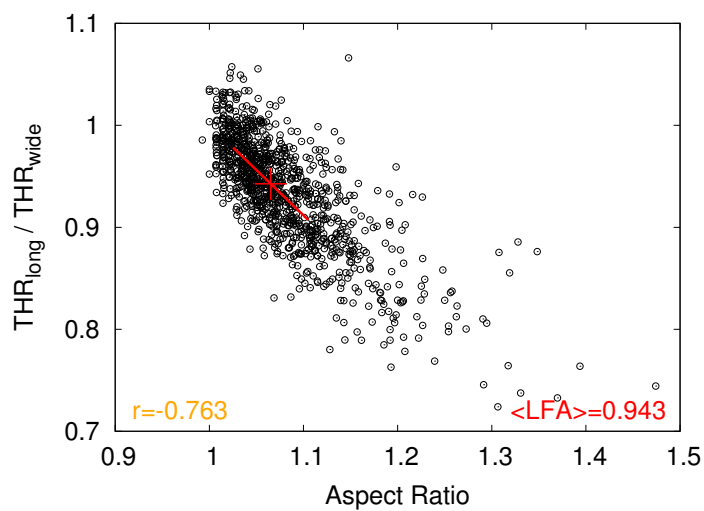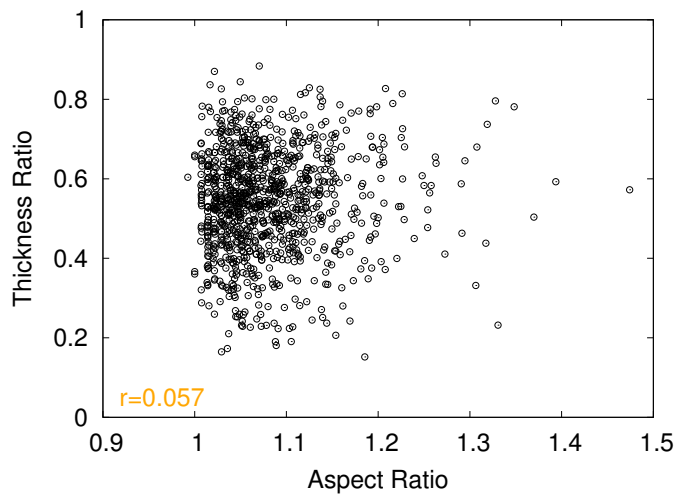

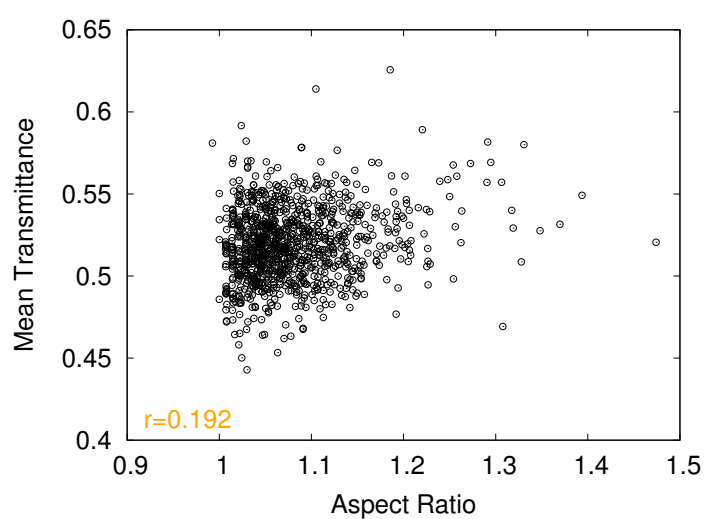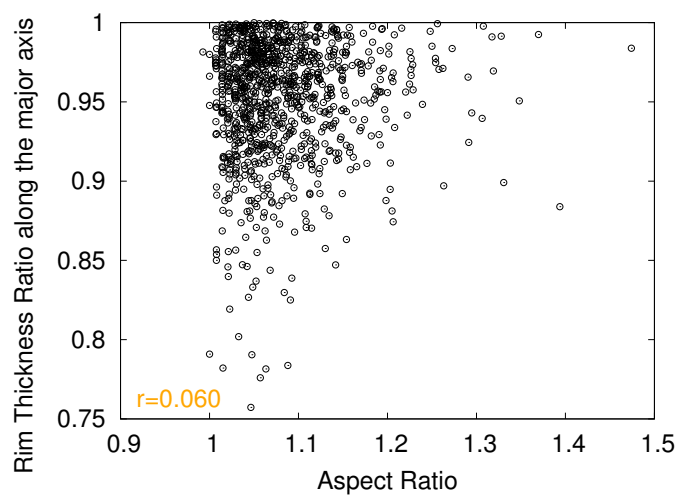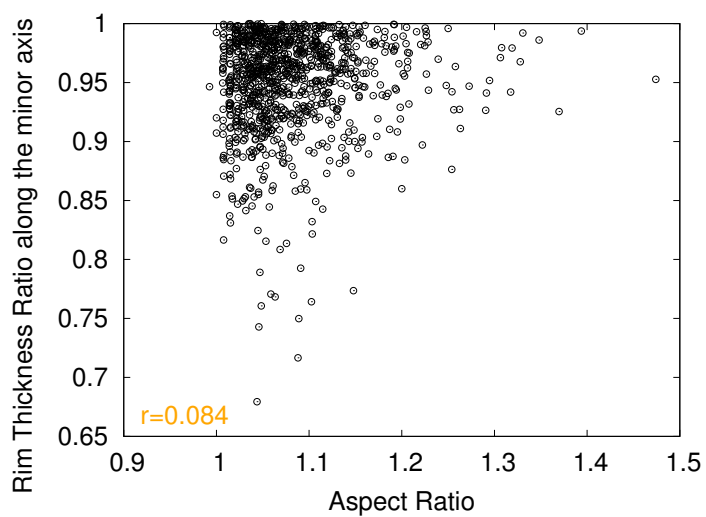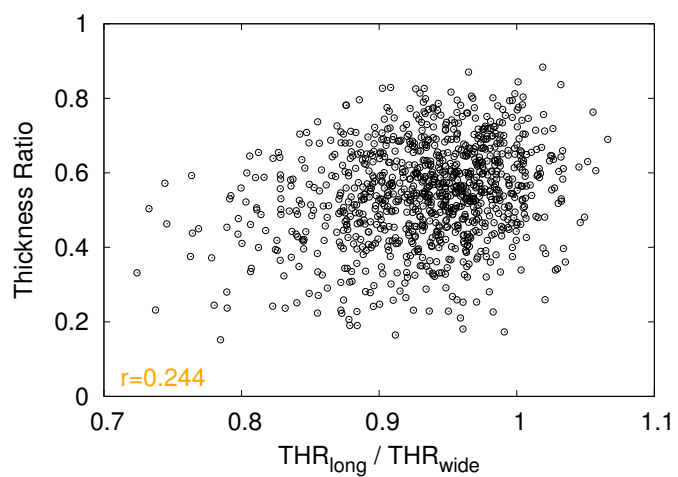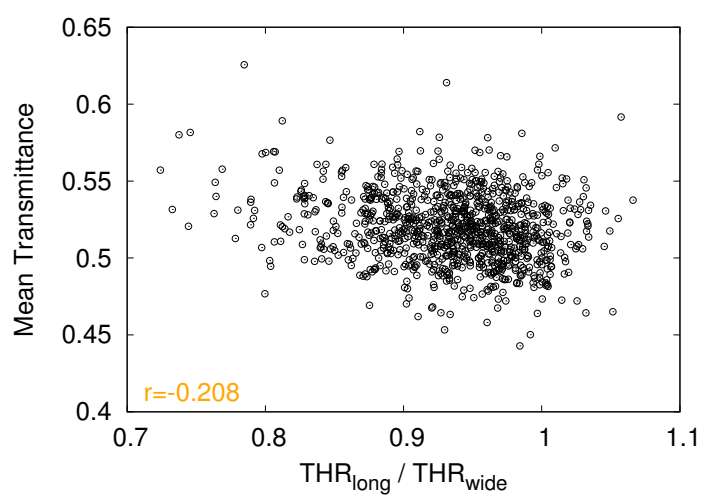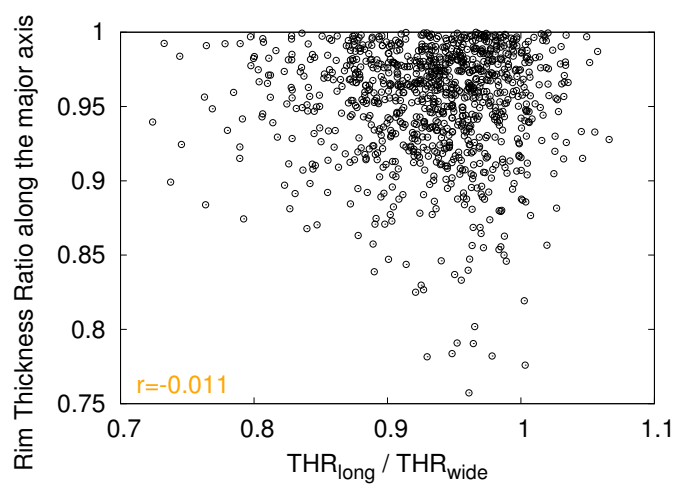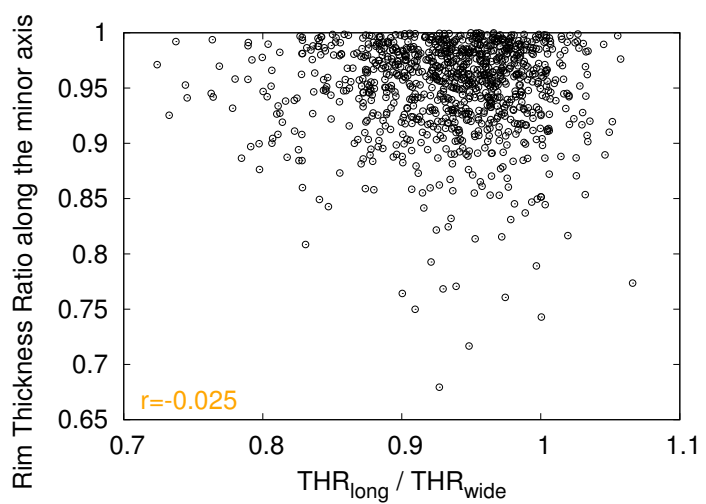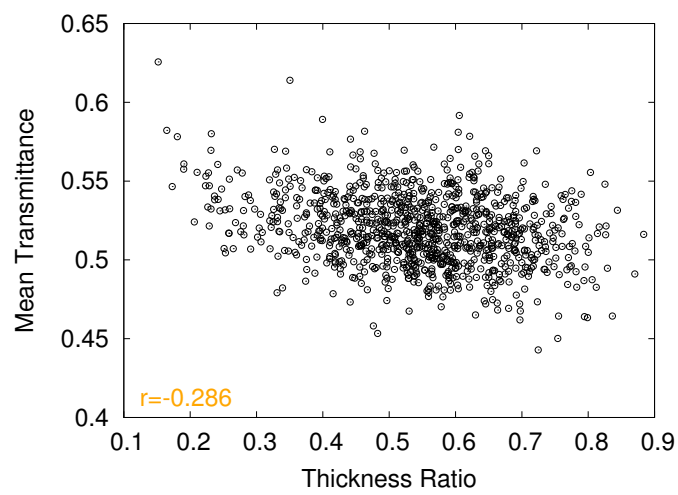



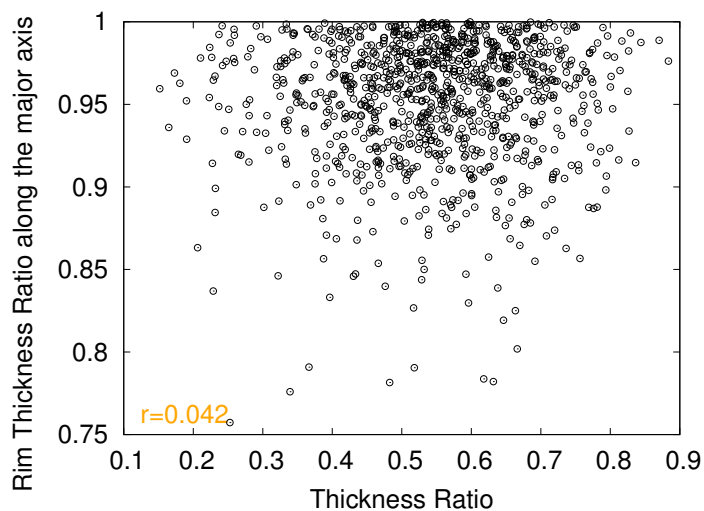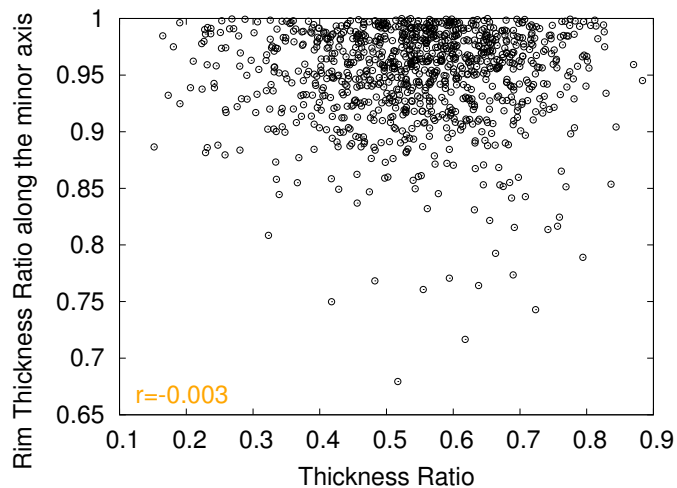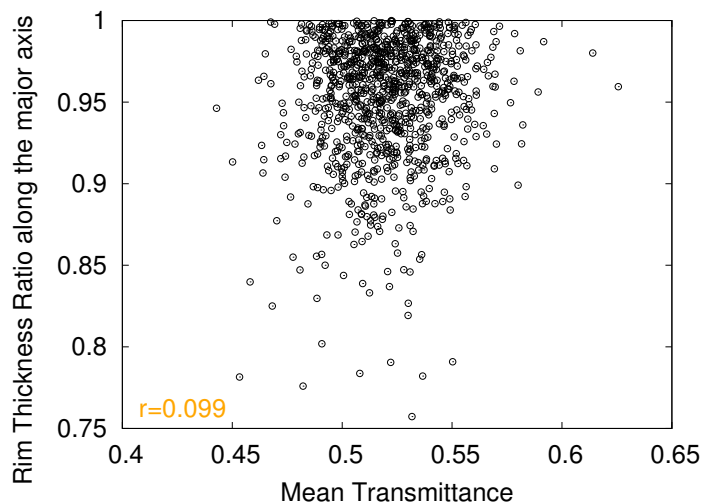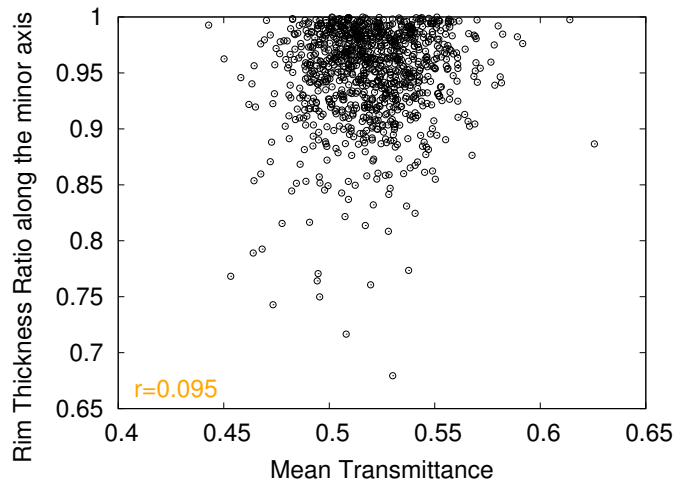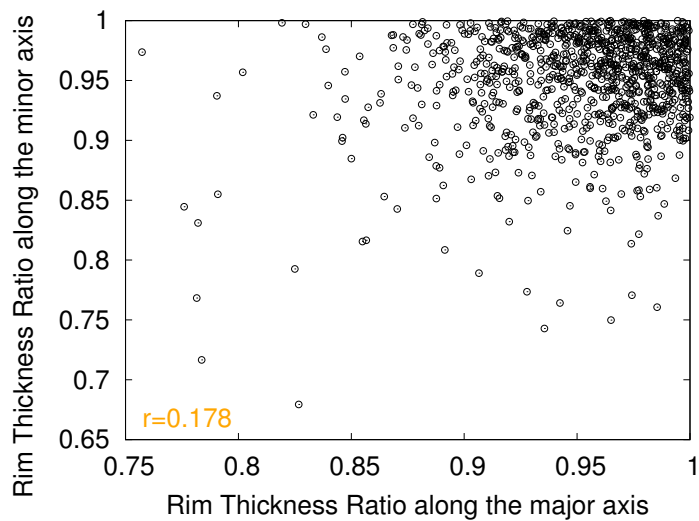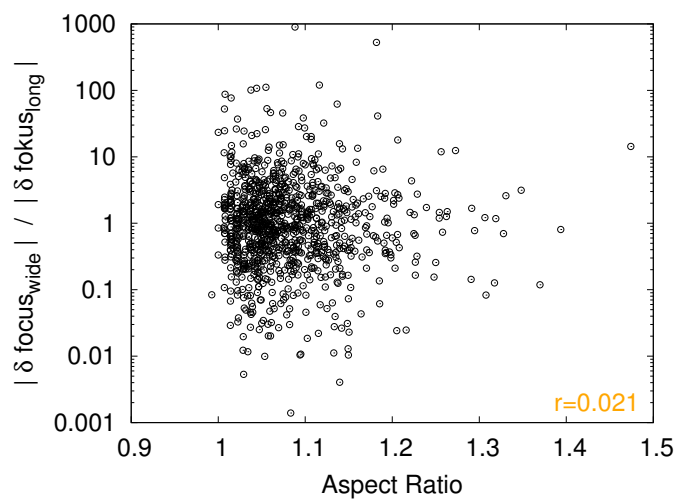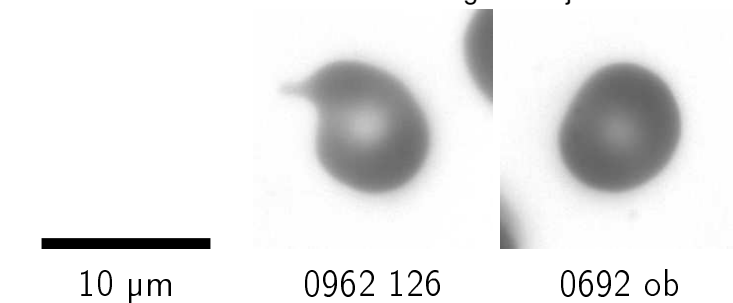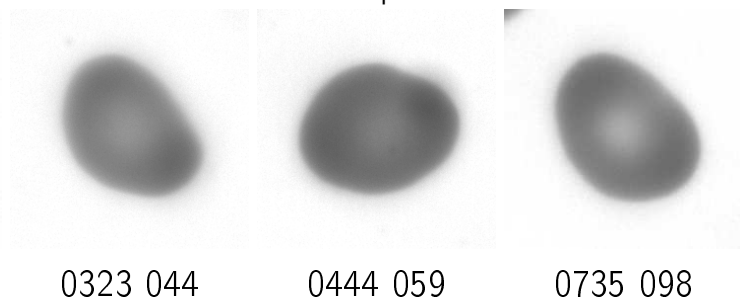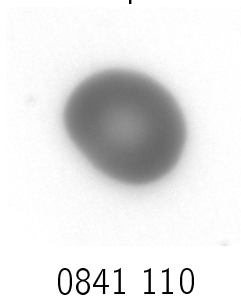

## Donor 4, serum washed

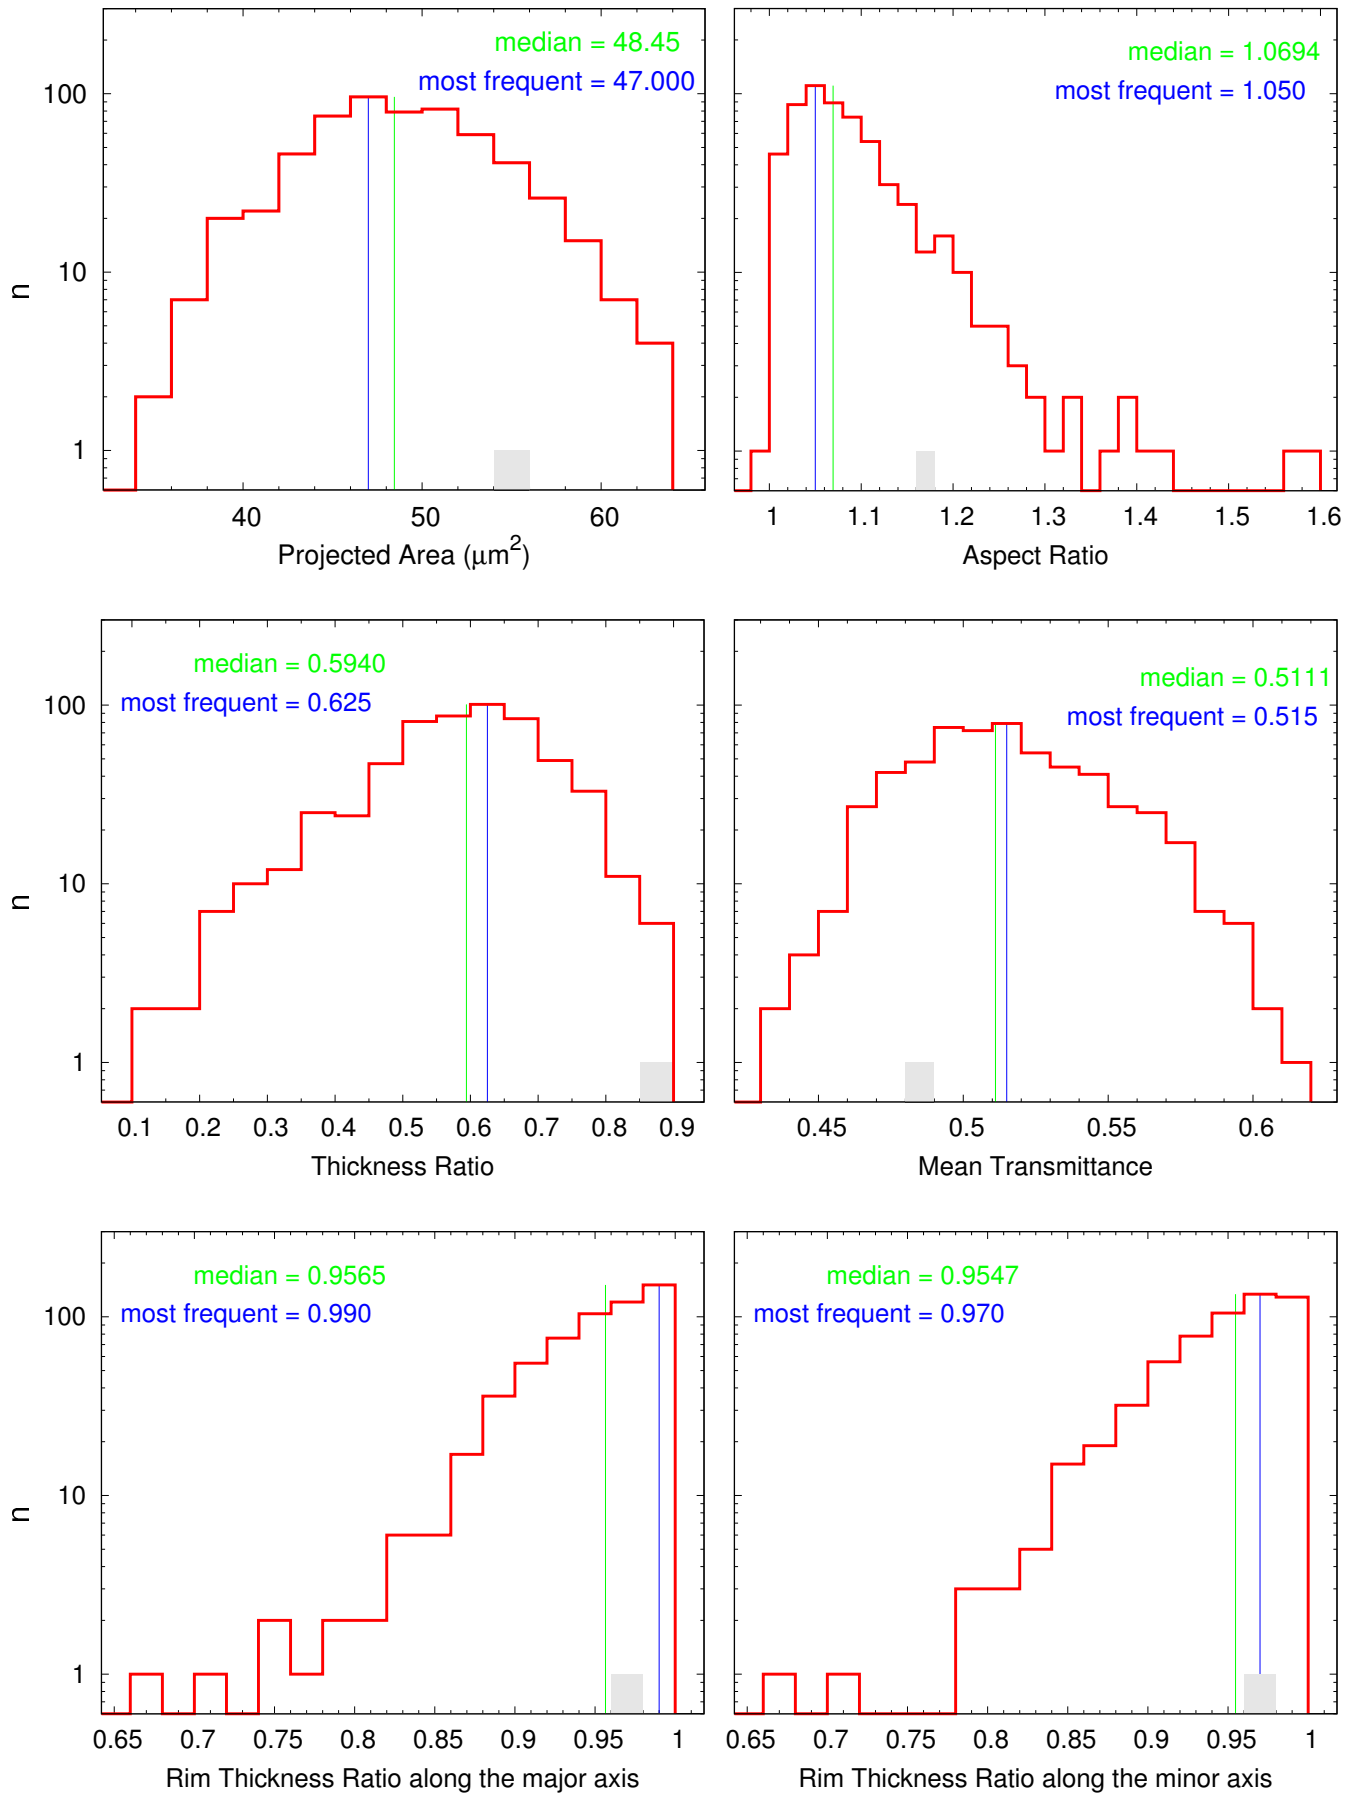

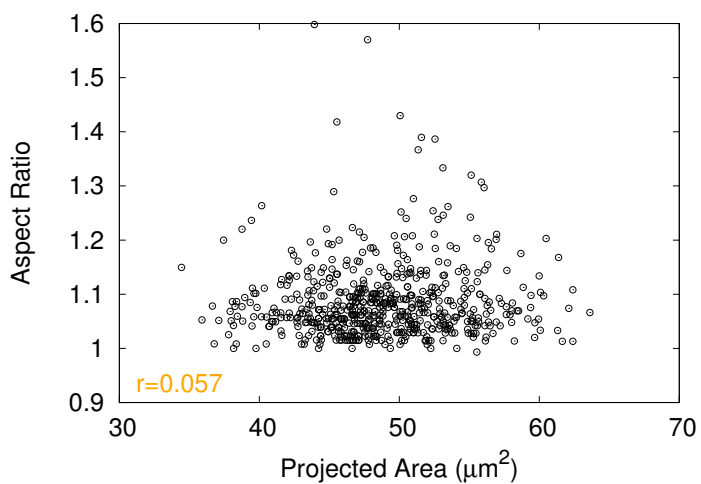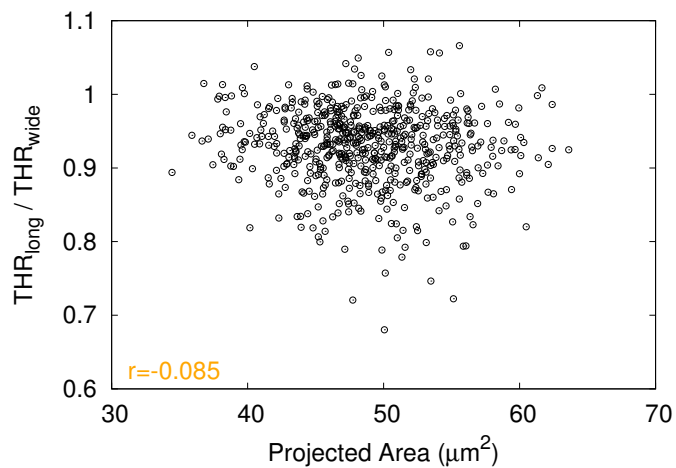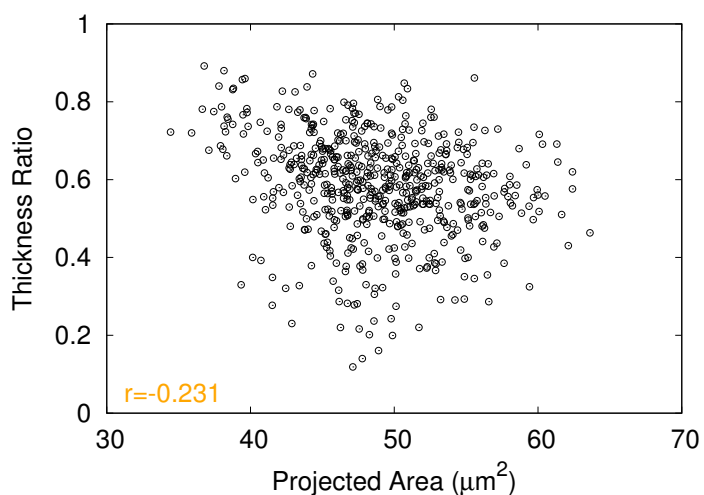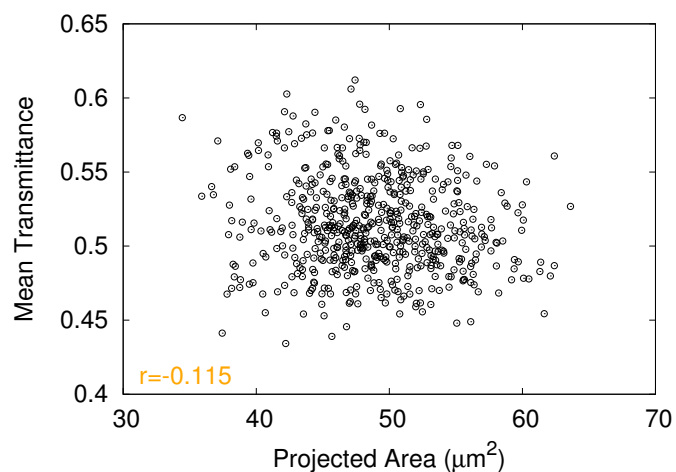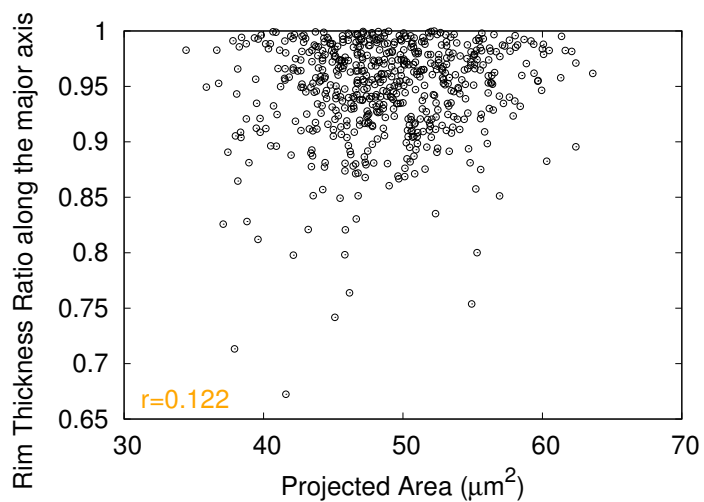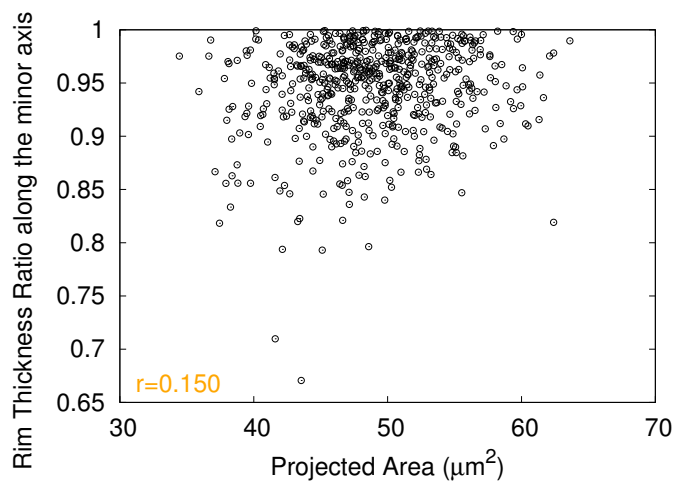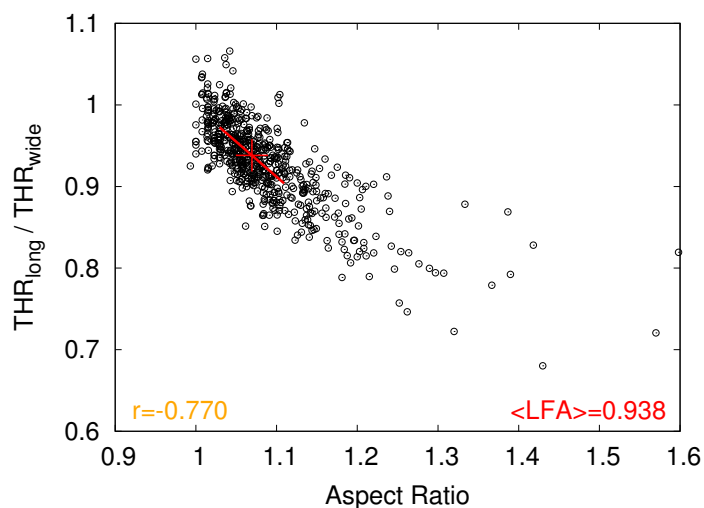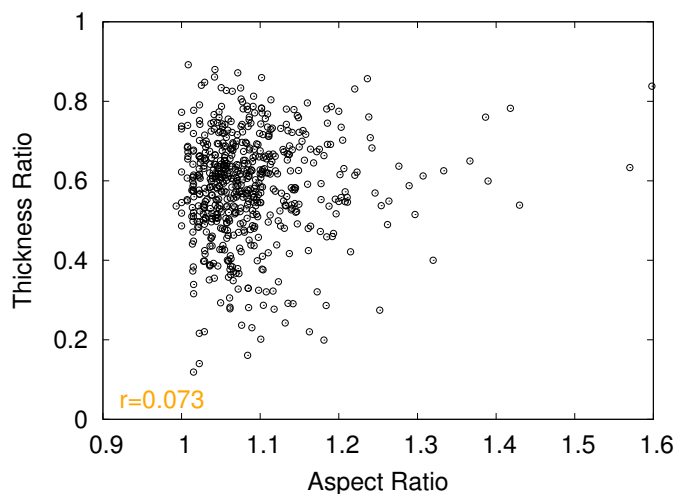

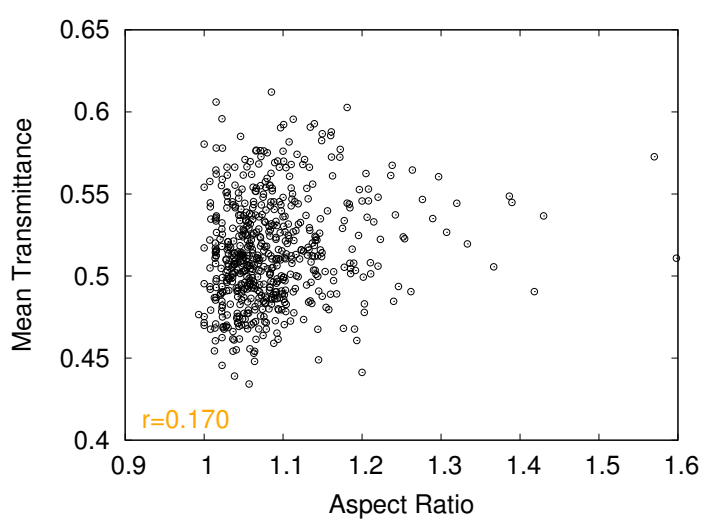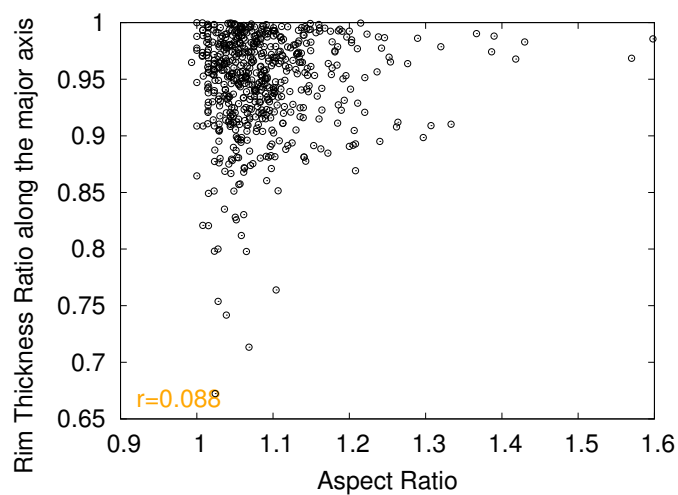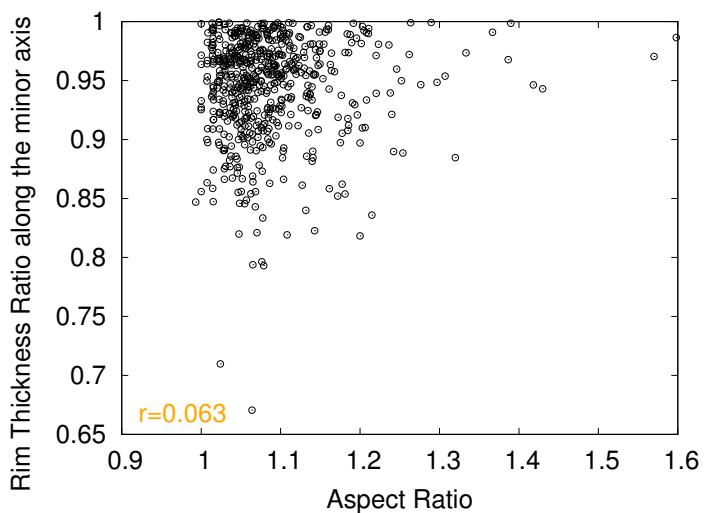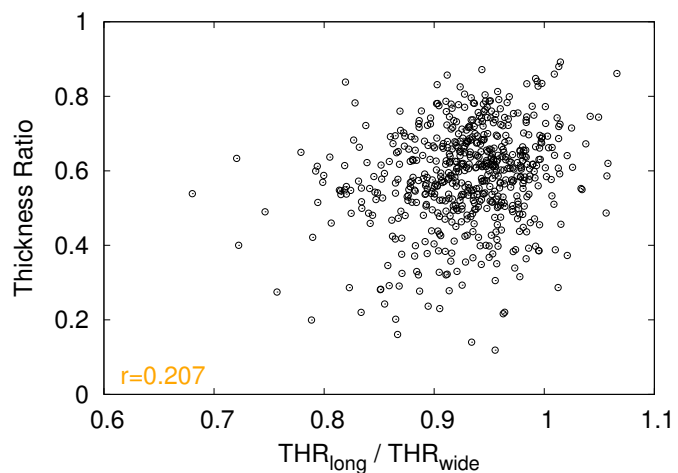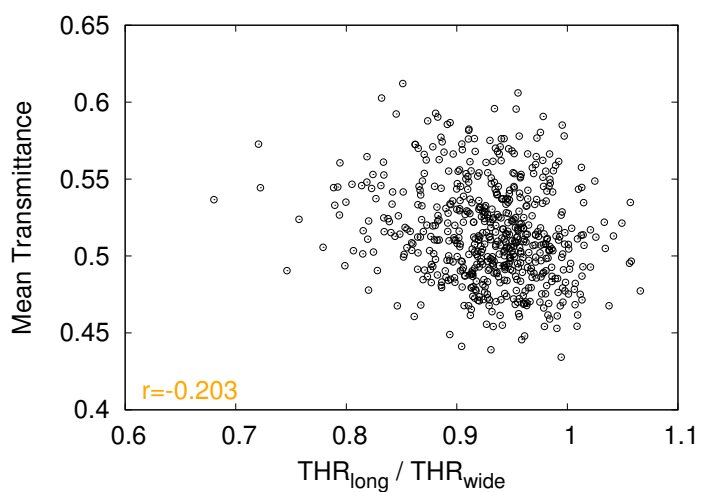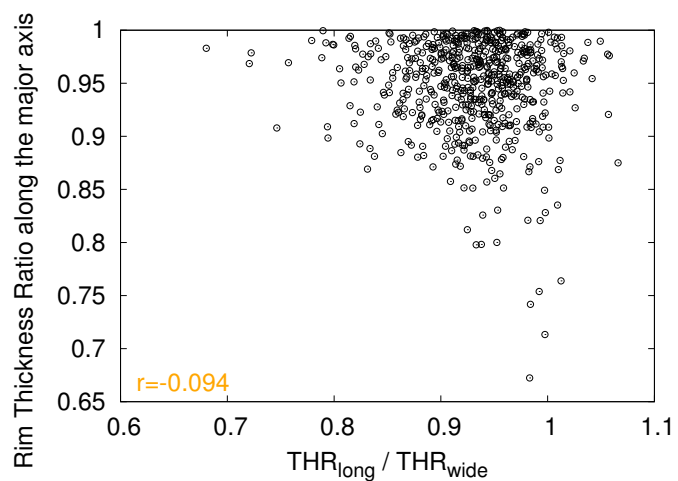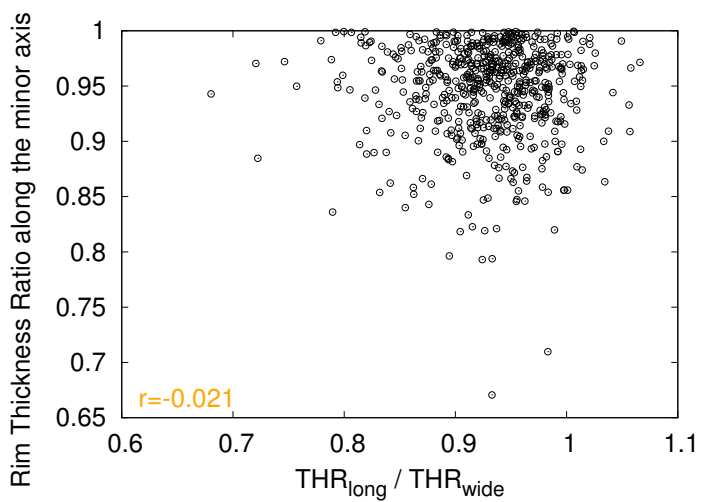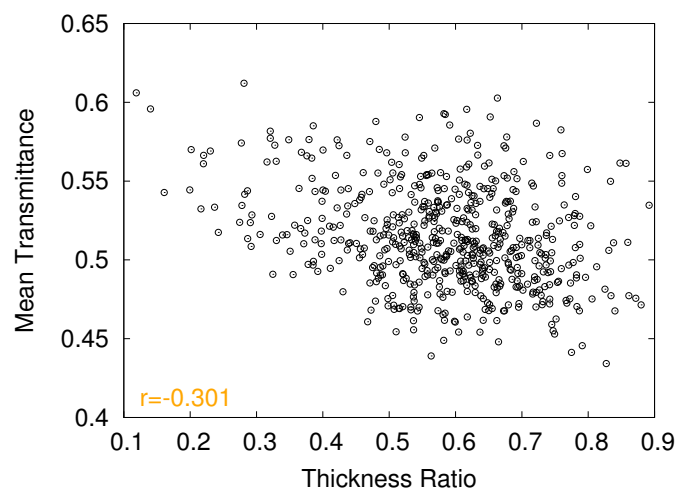

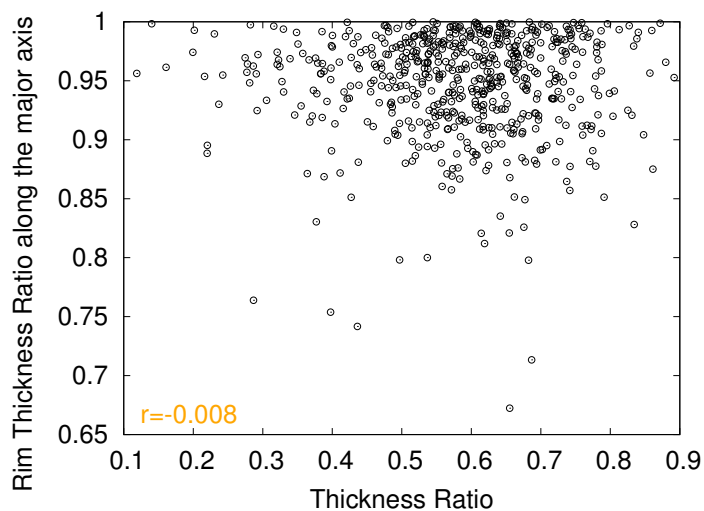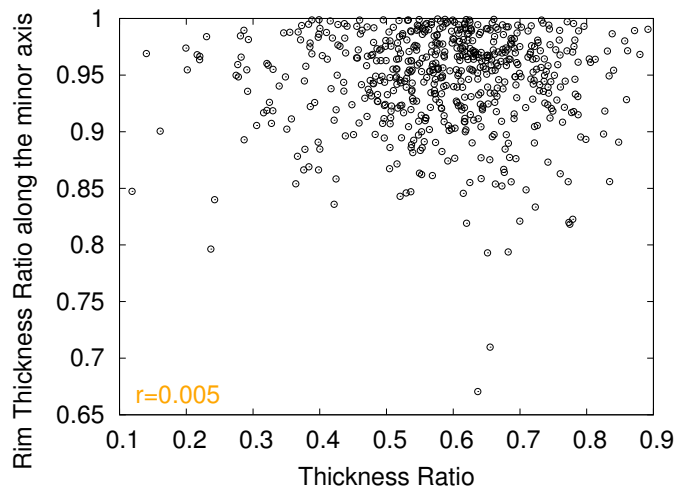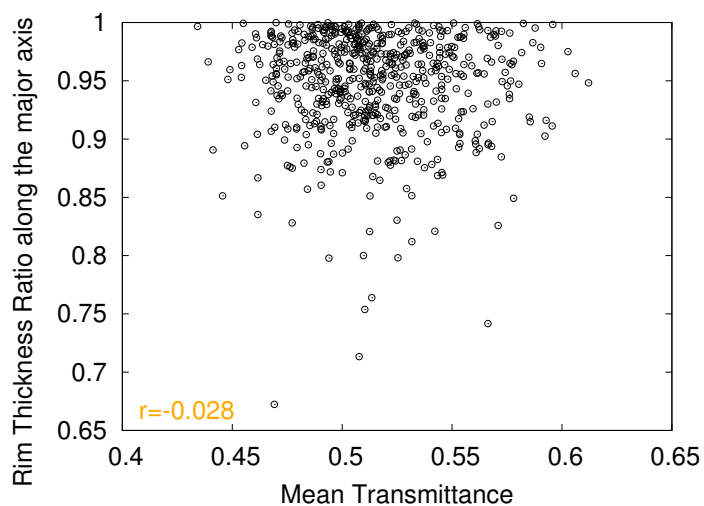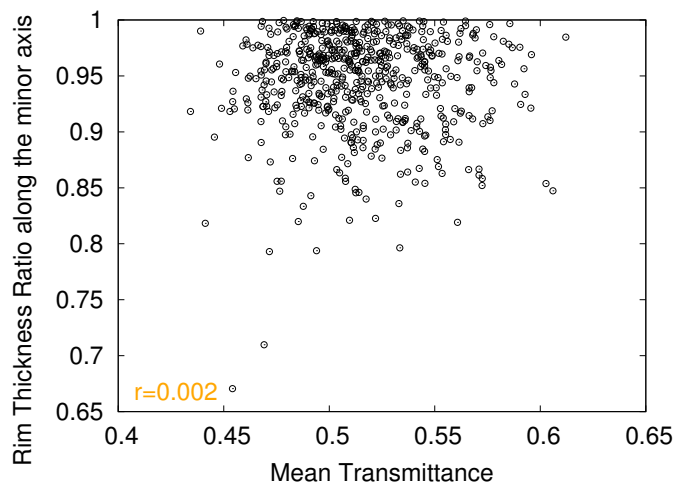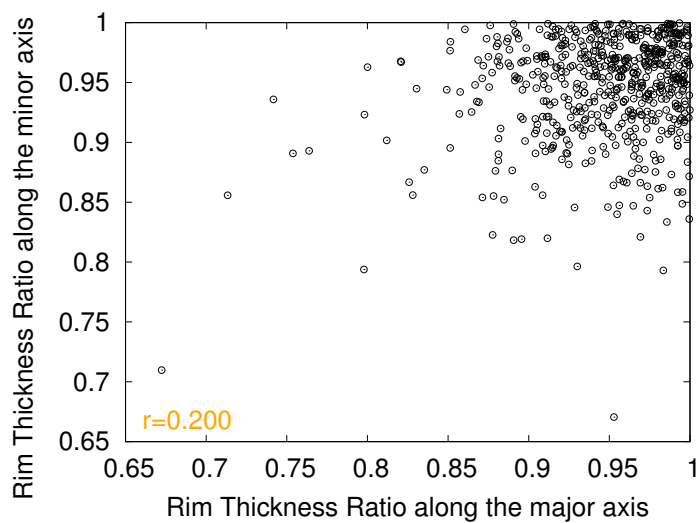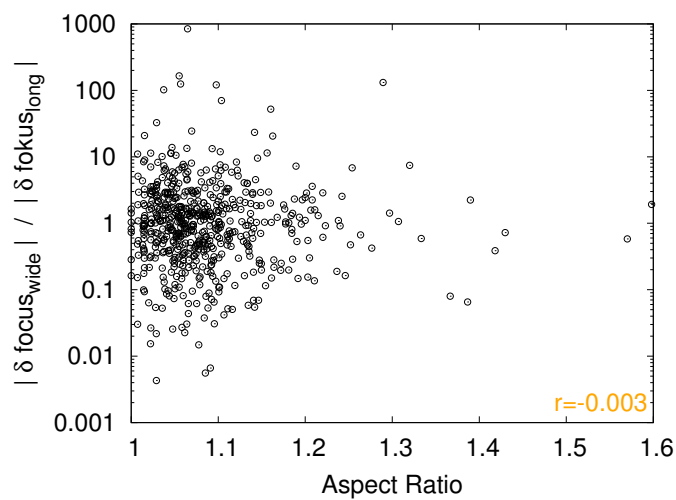

10  $\mu\text{m}$

0647 80.1

0605 12991

## Donor 5, plasma

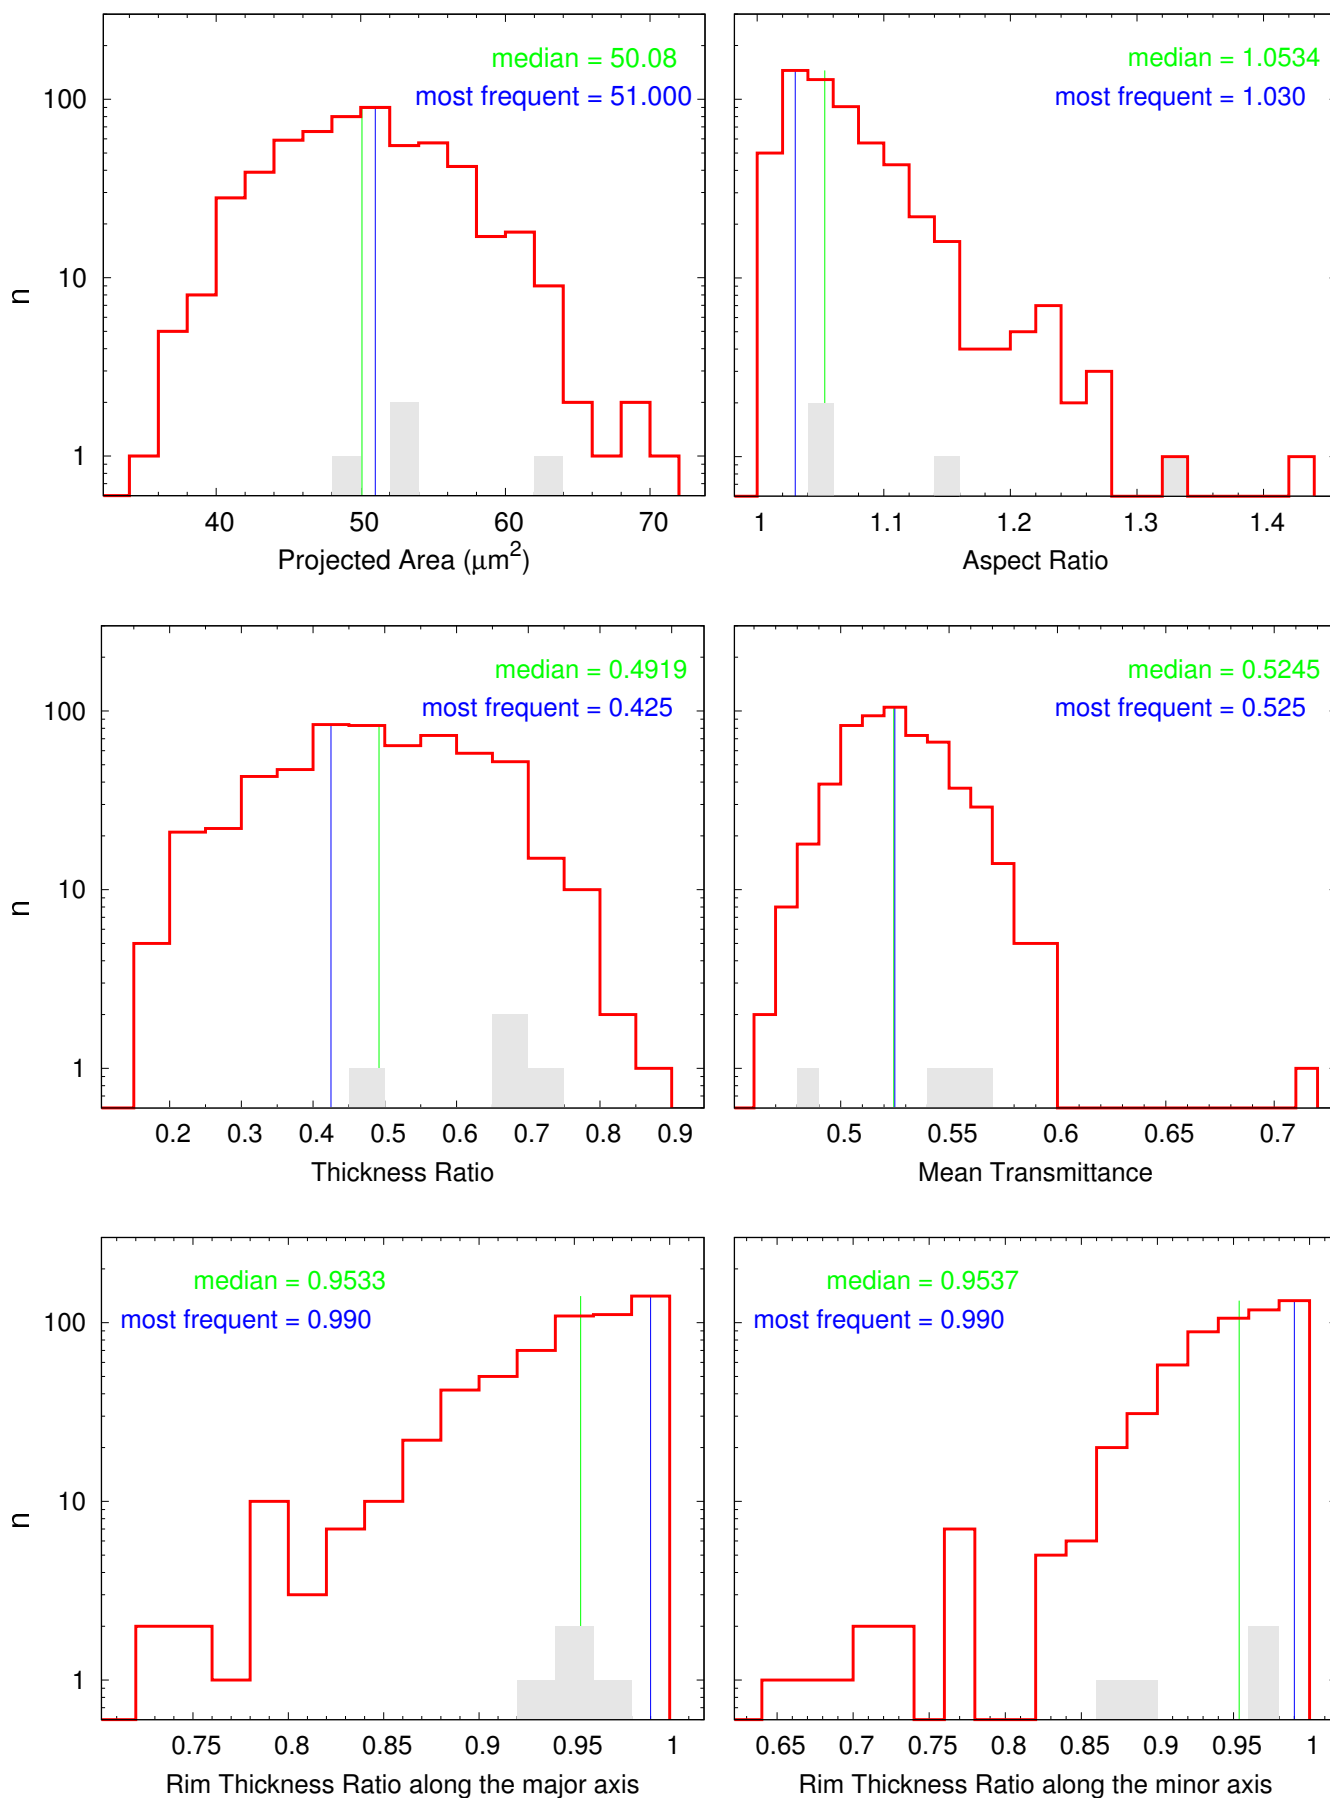



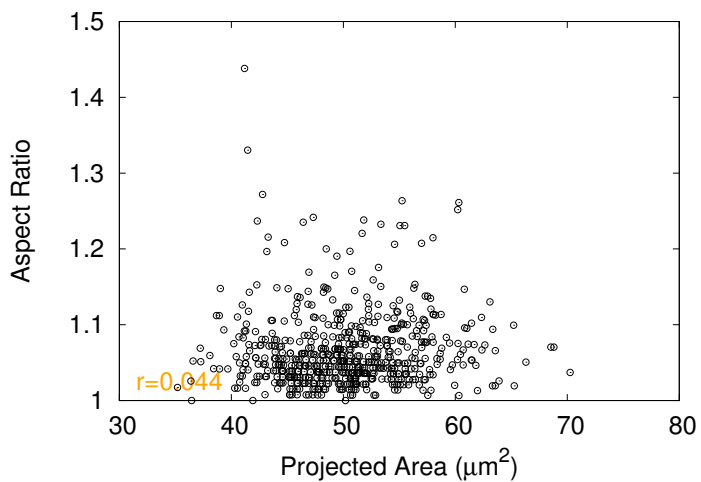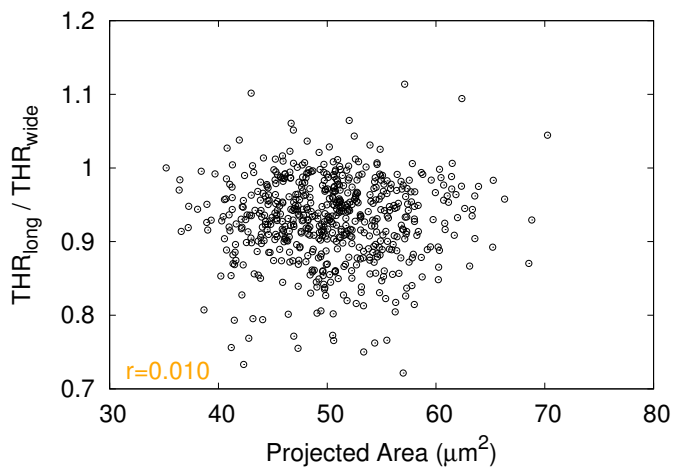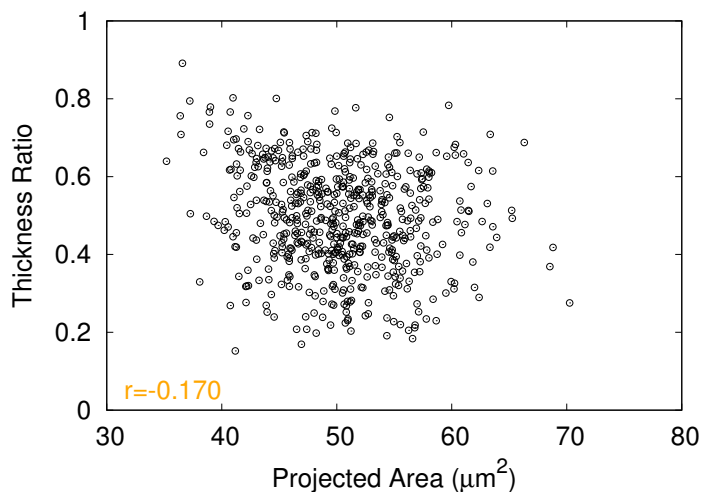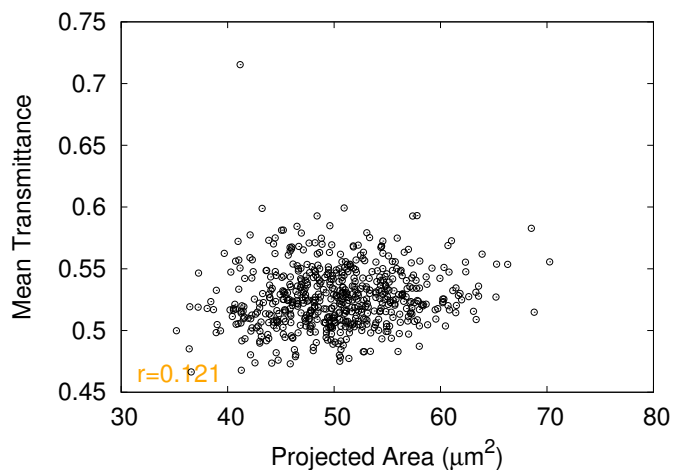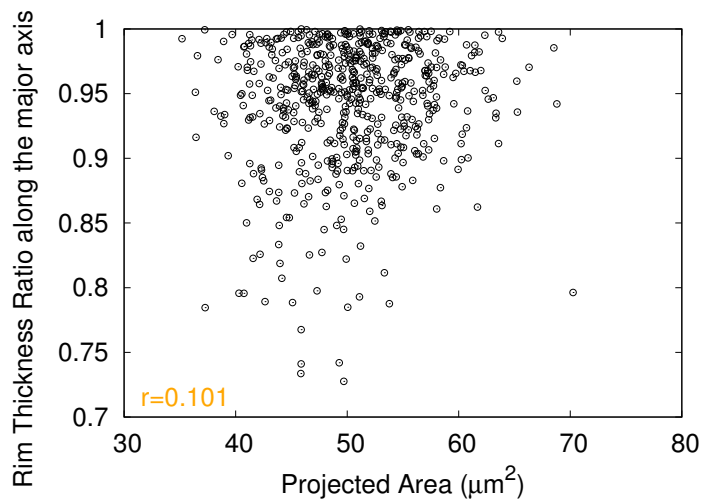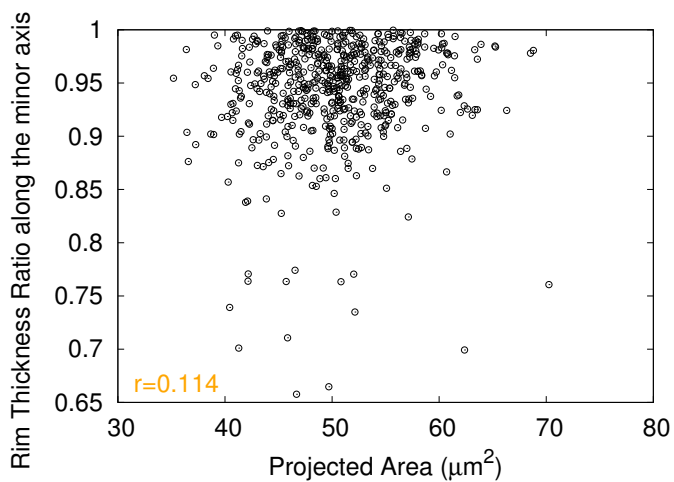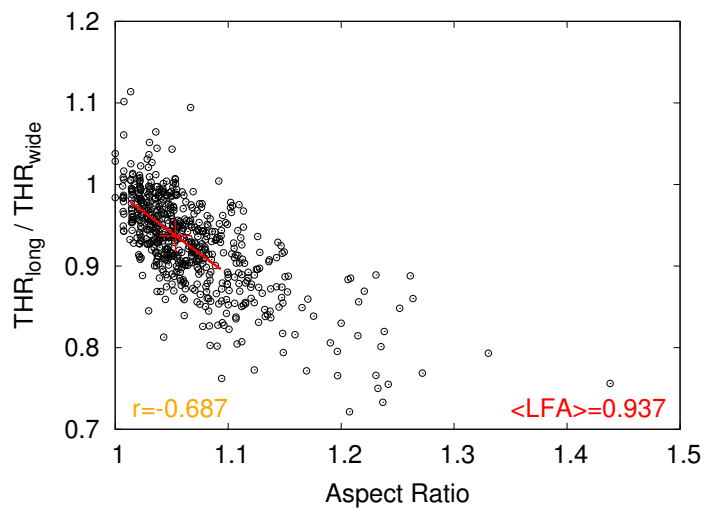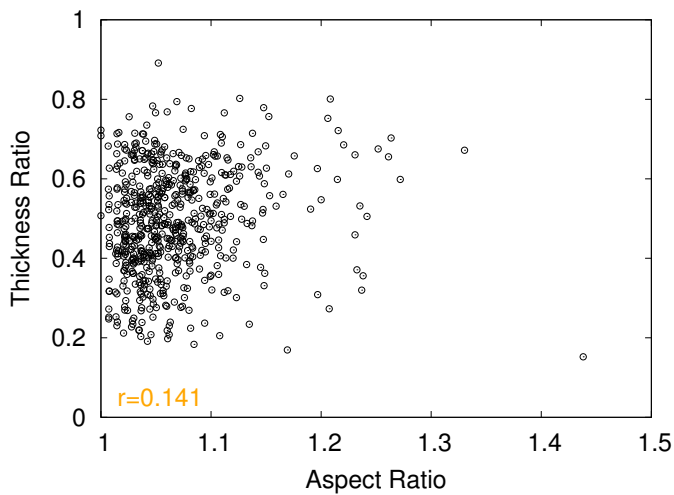

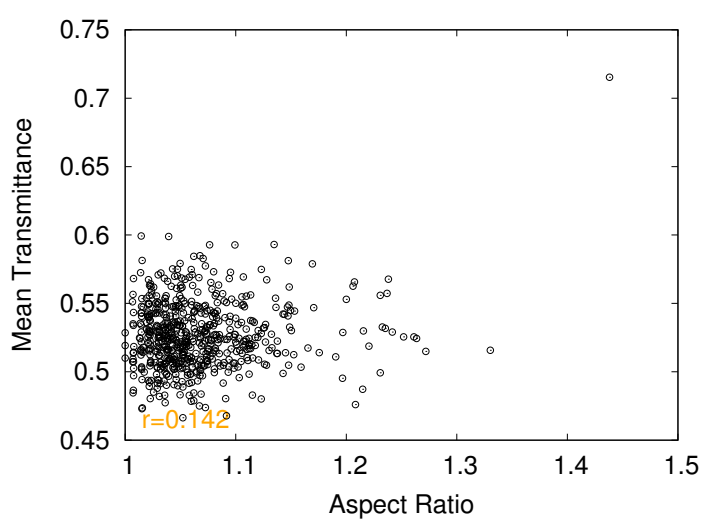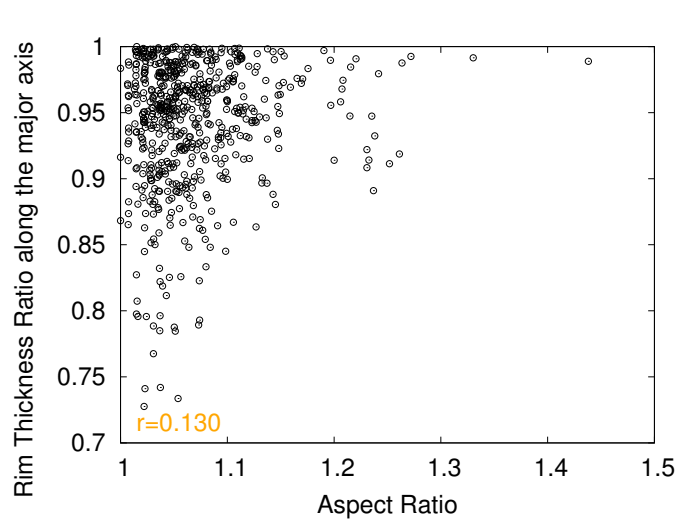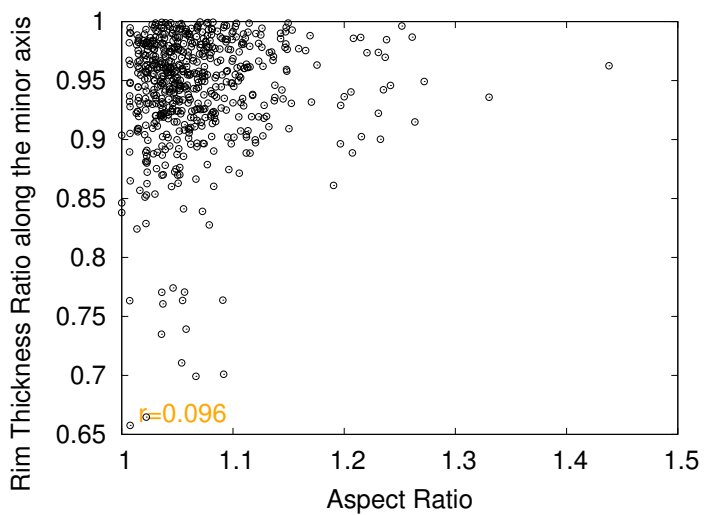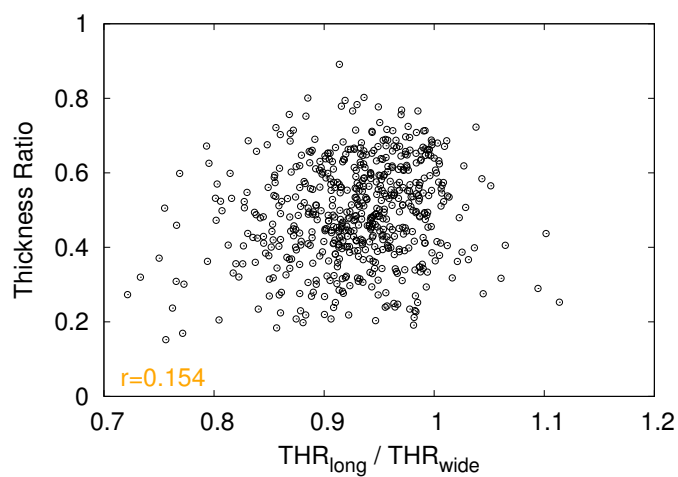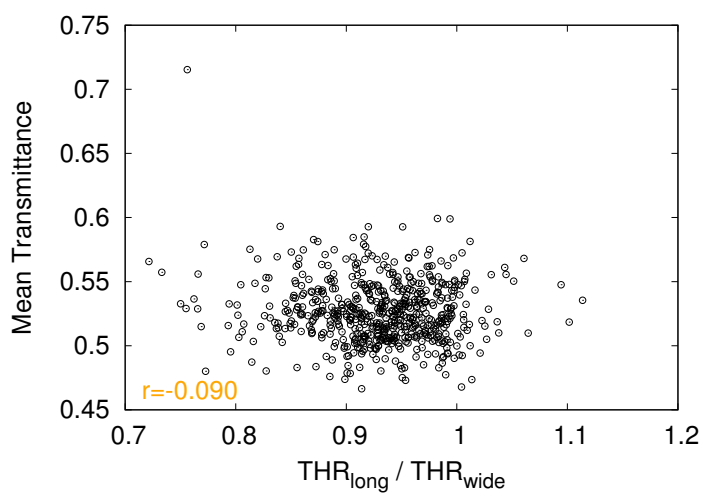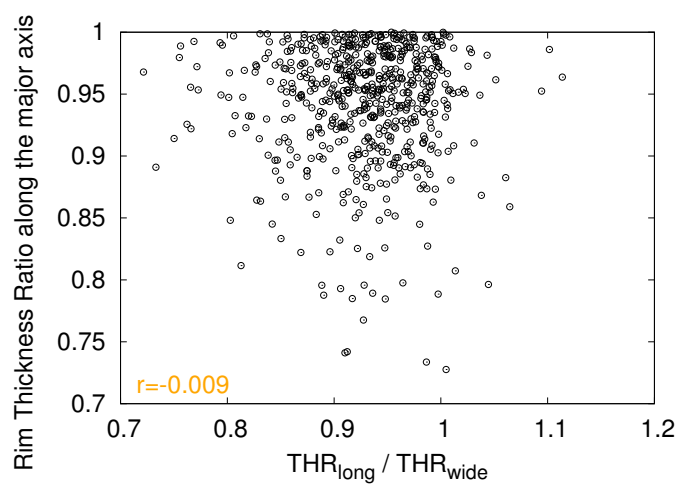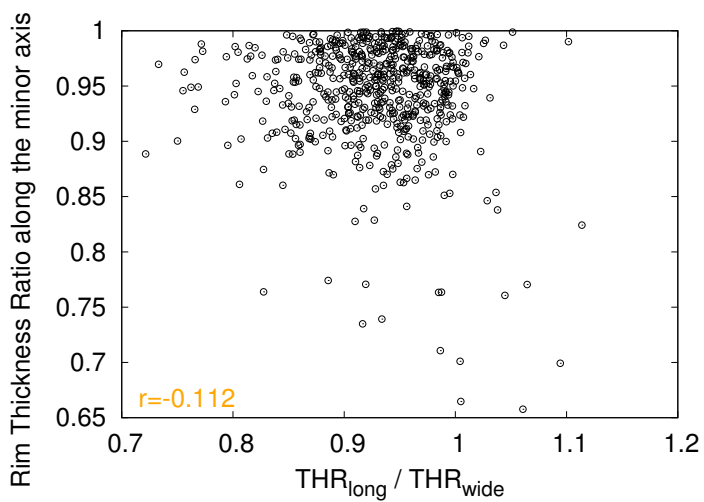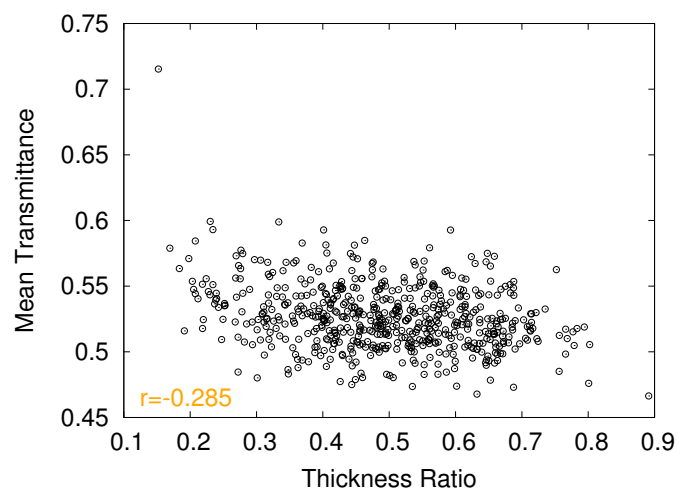

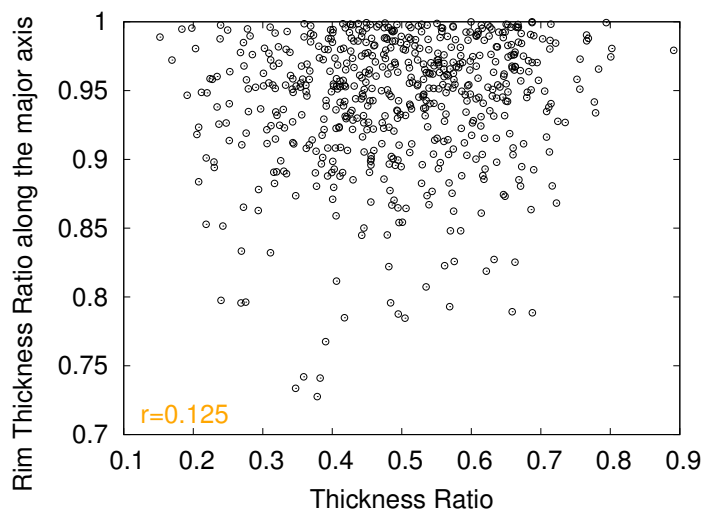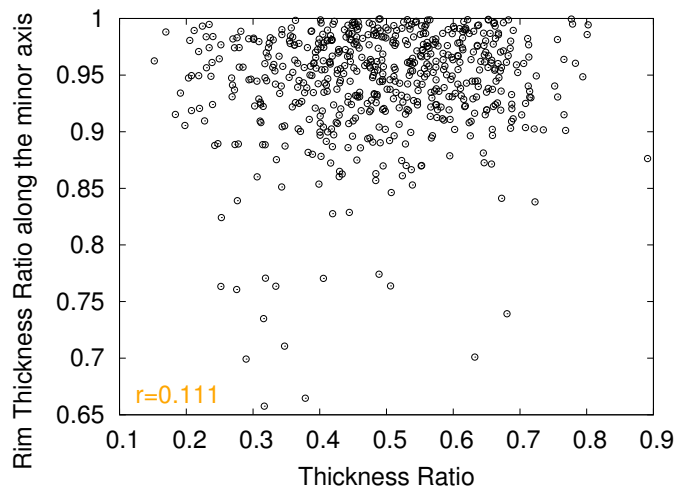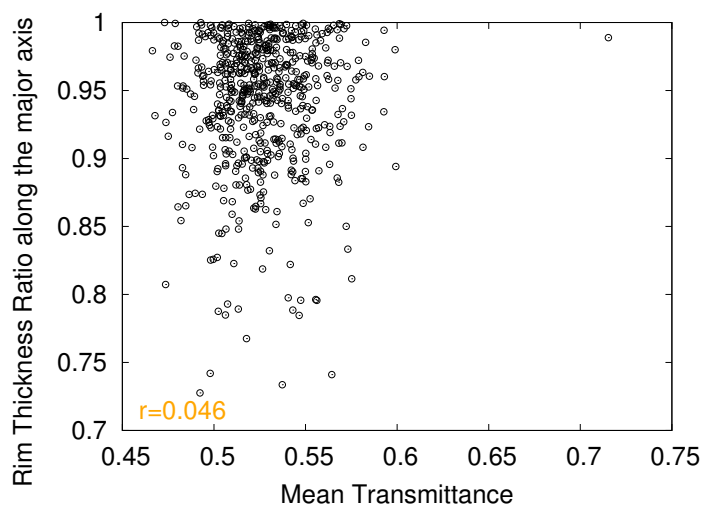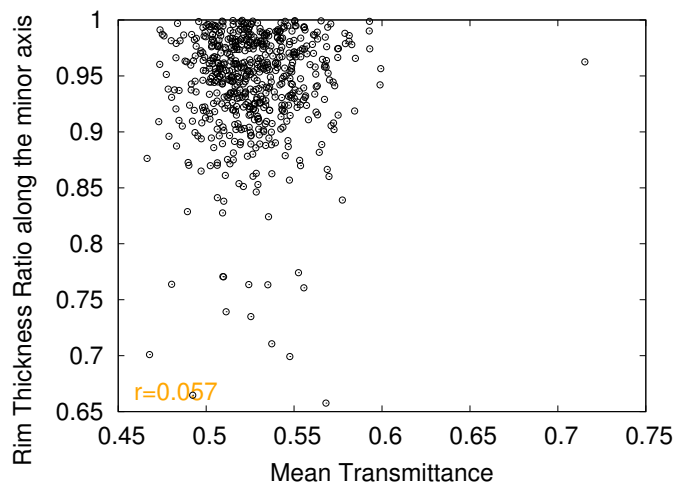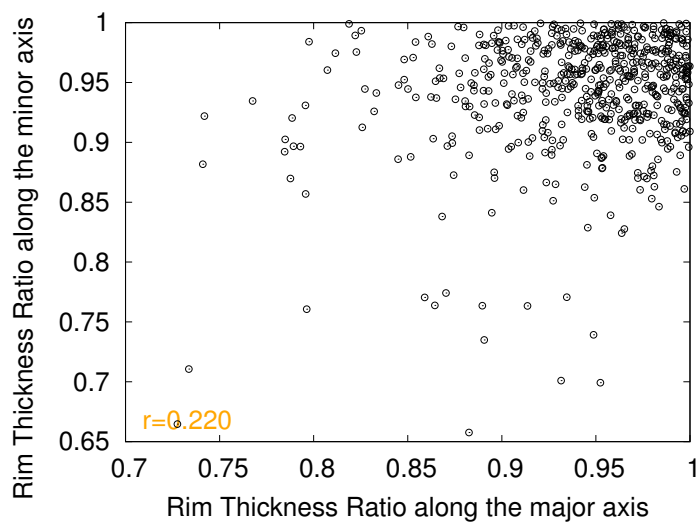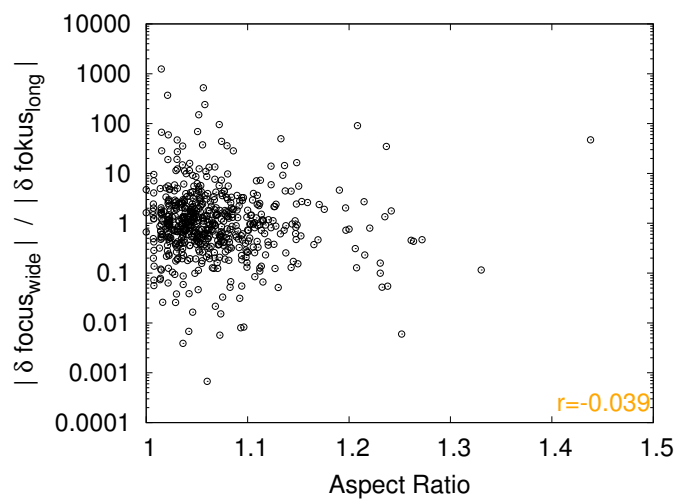

10  $\mu\text{m}$

0125 73.6

1090 72.8

## Donor 5, serum washed

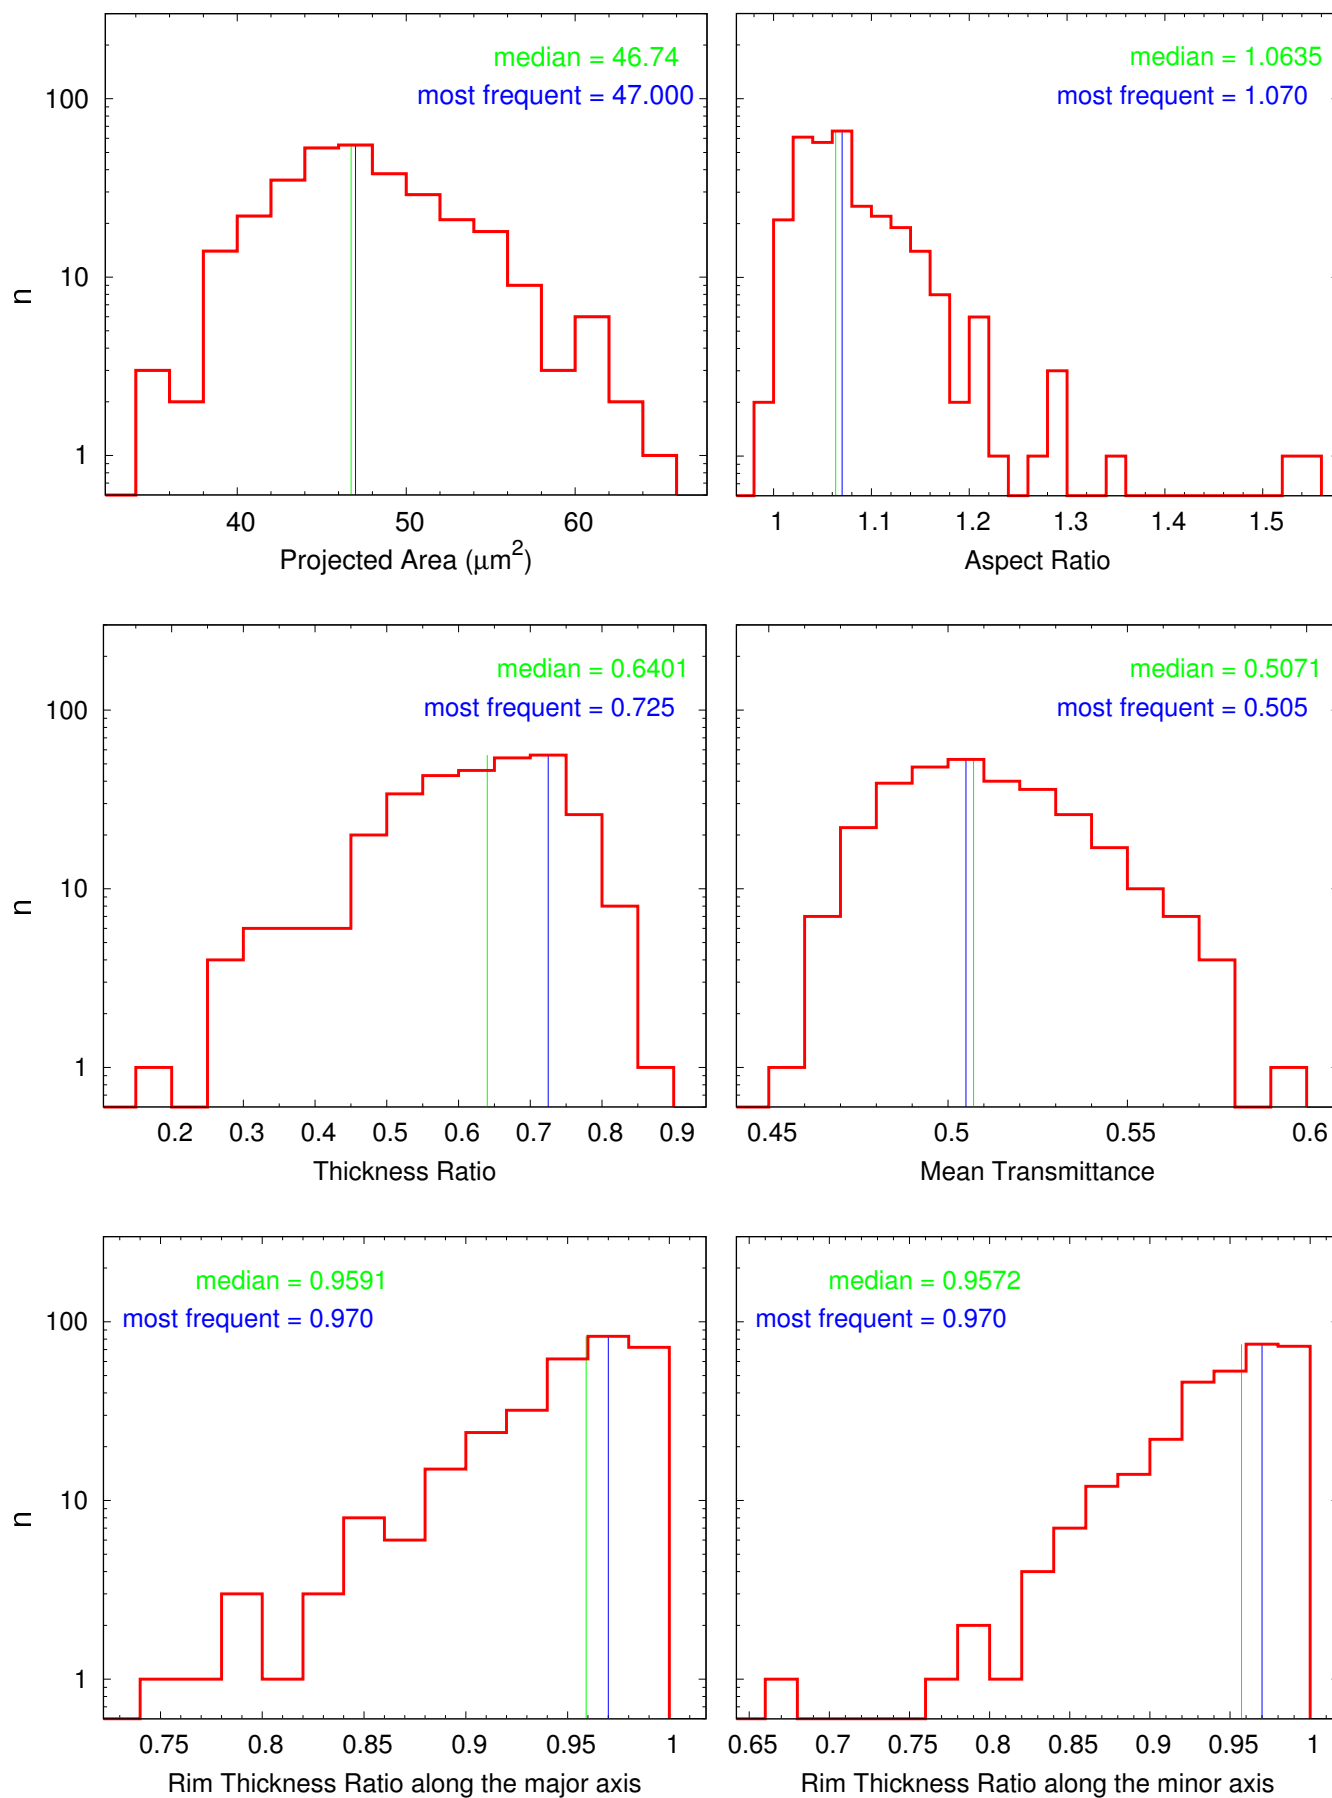

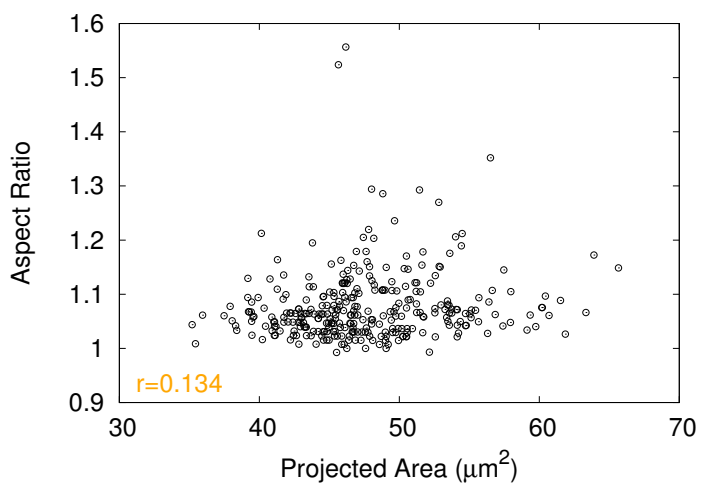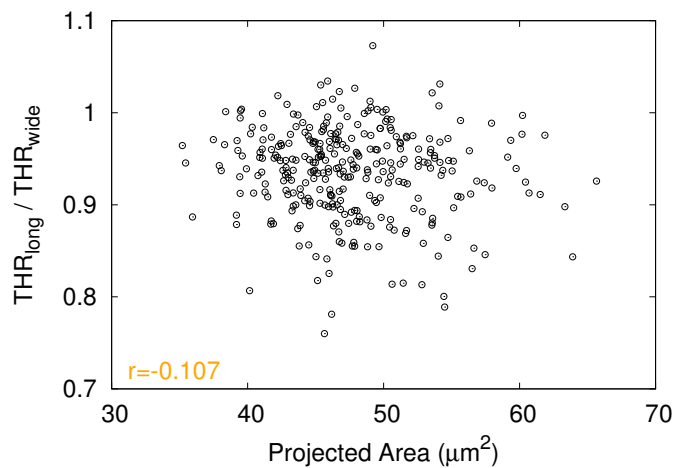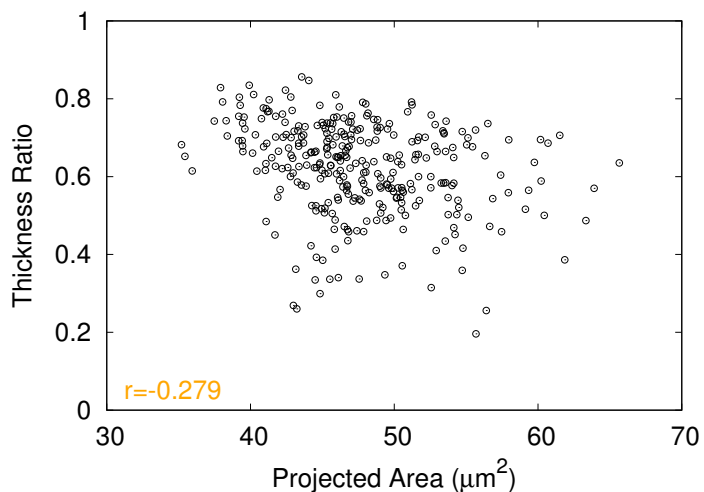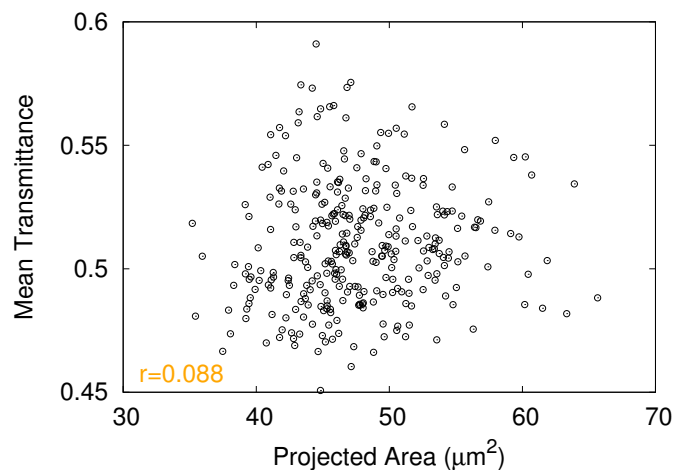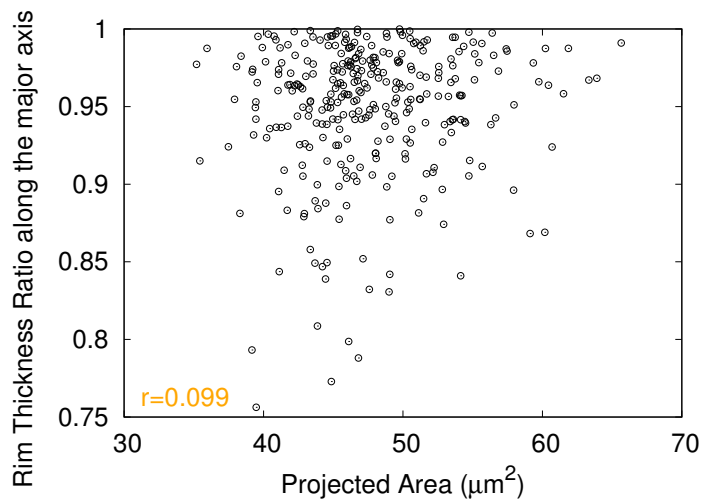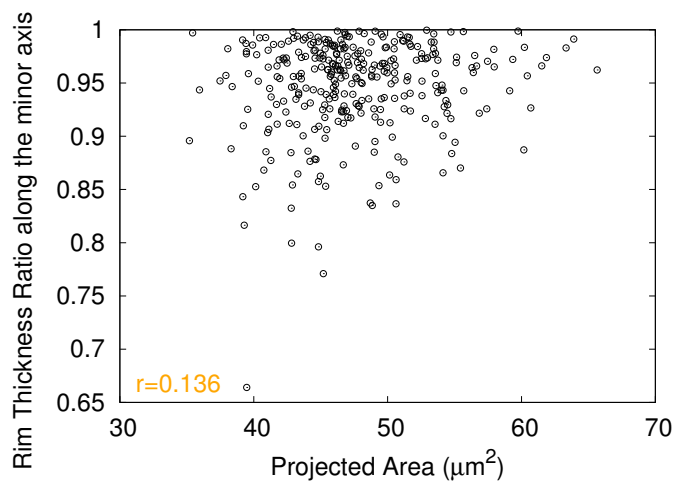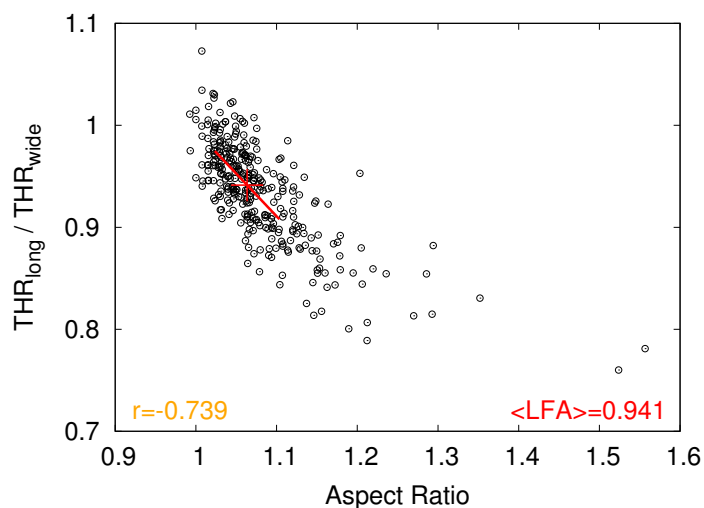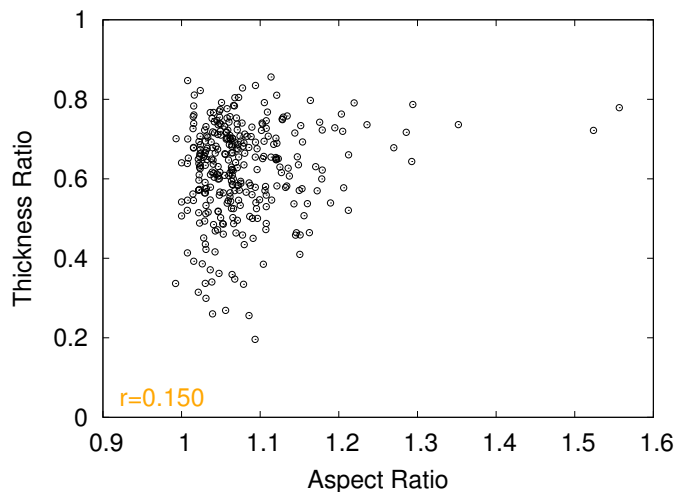

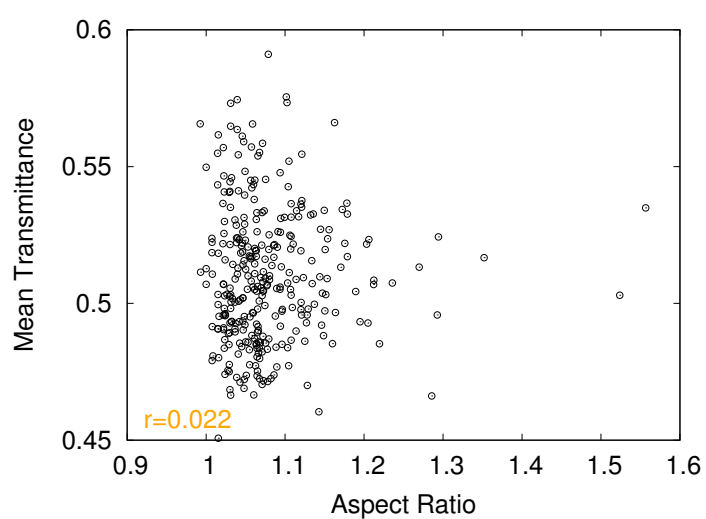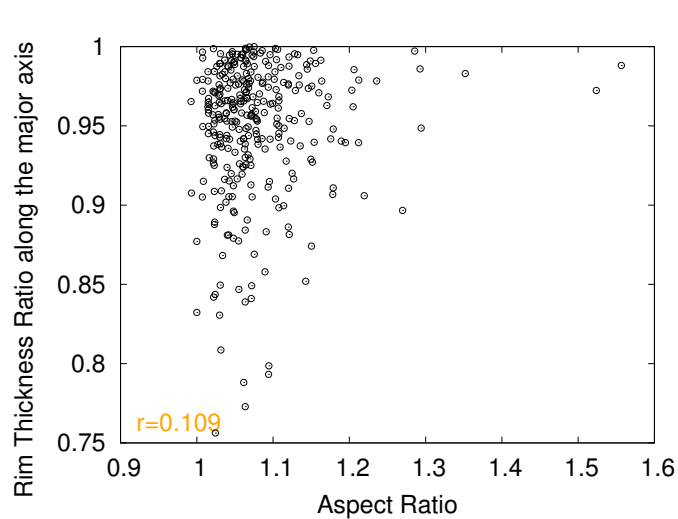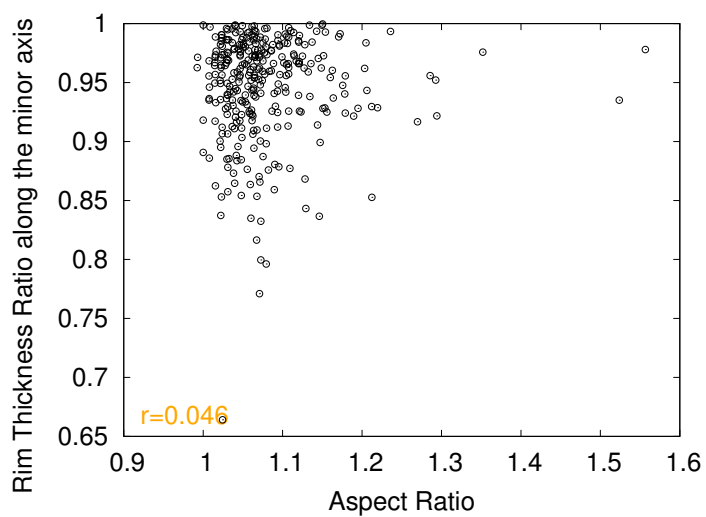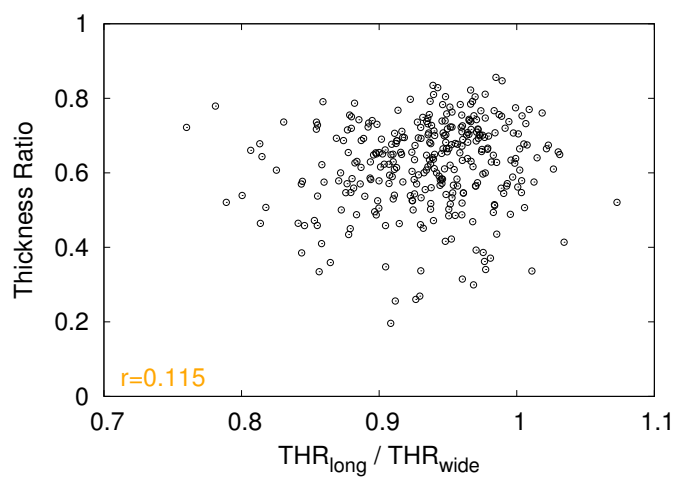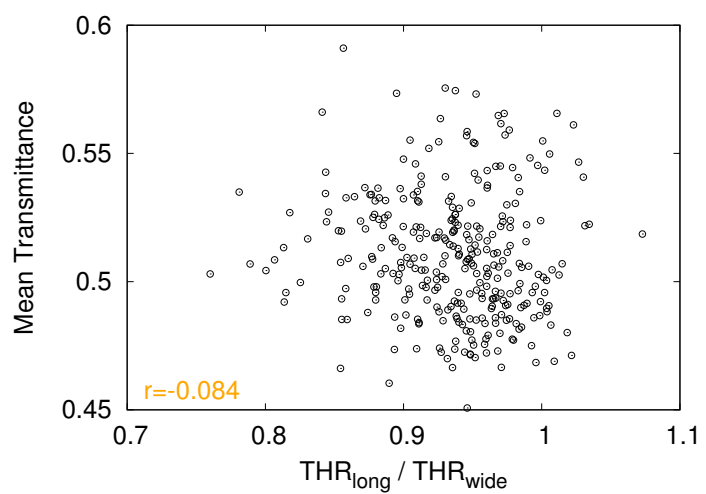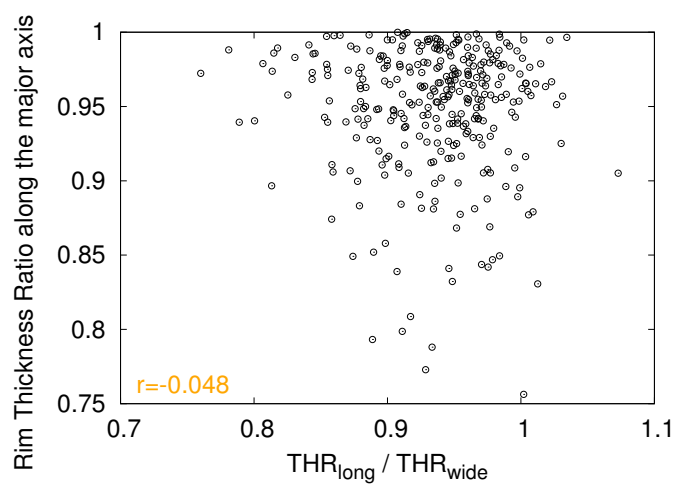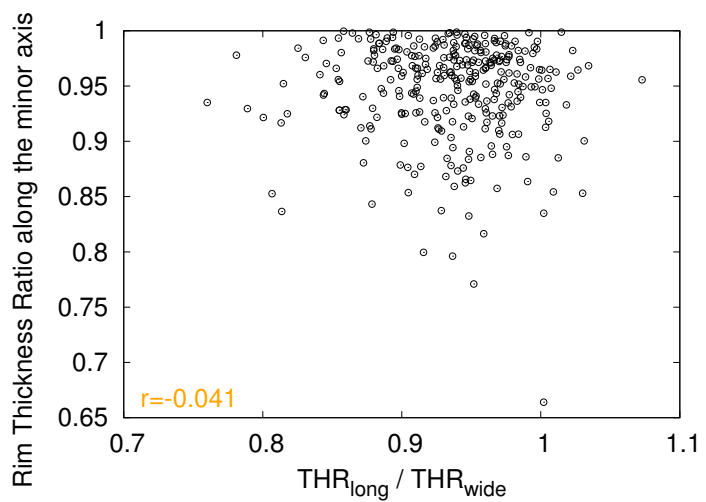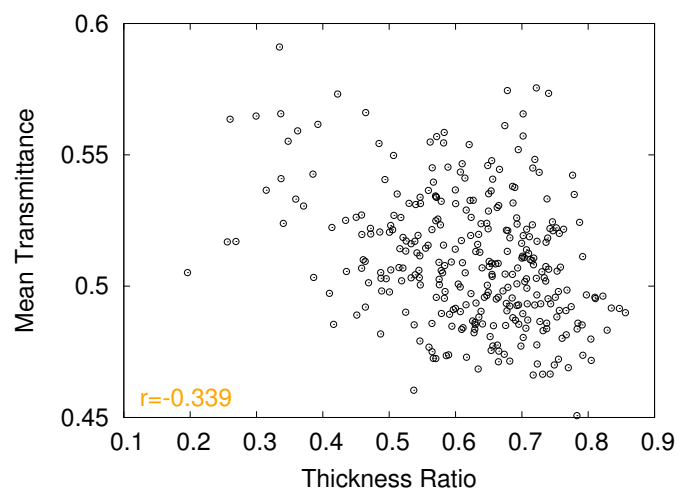



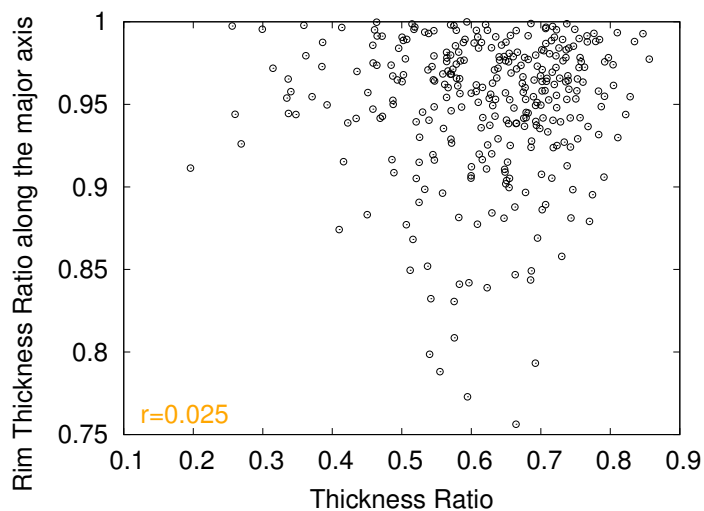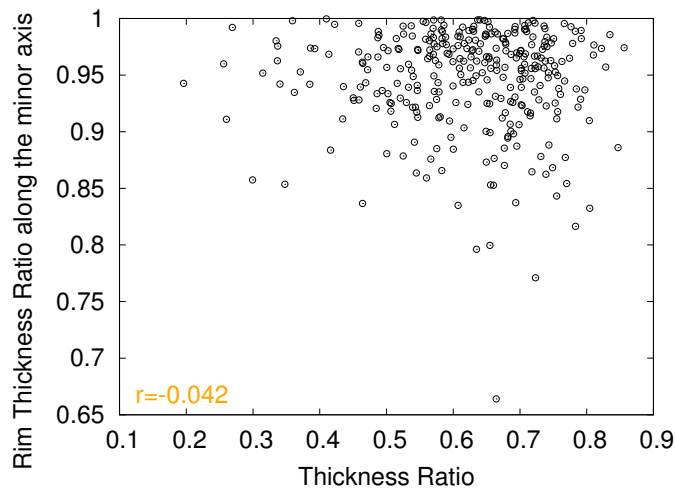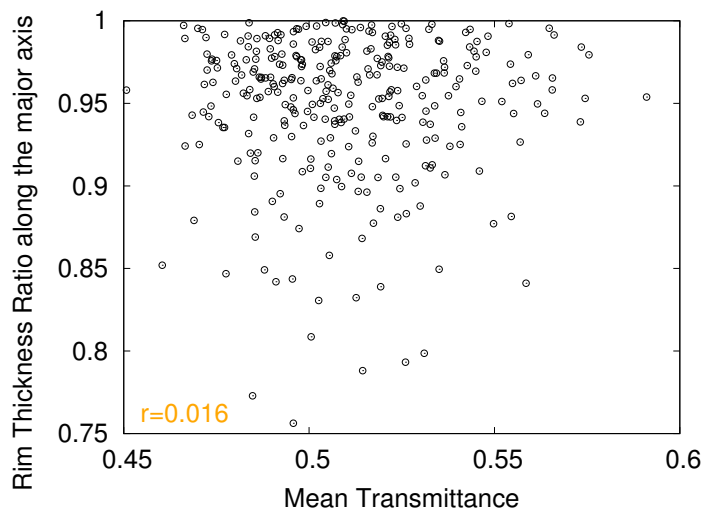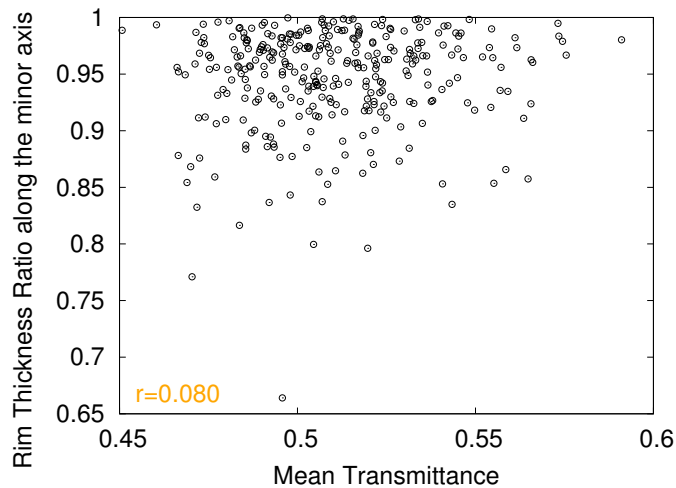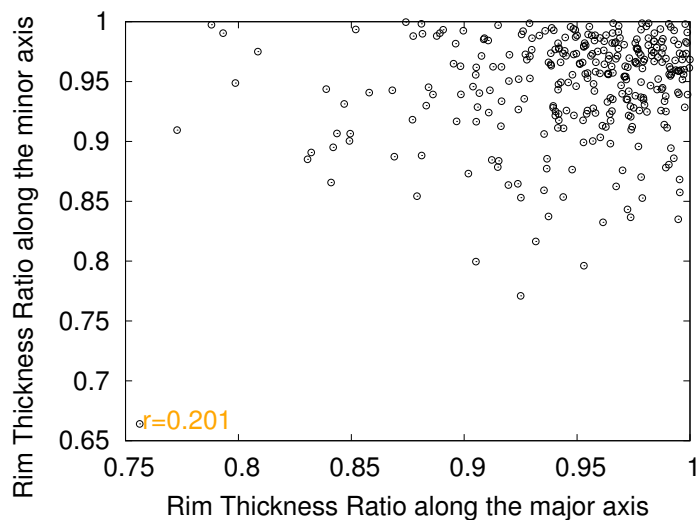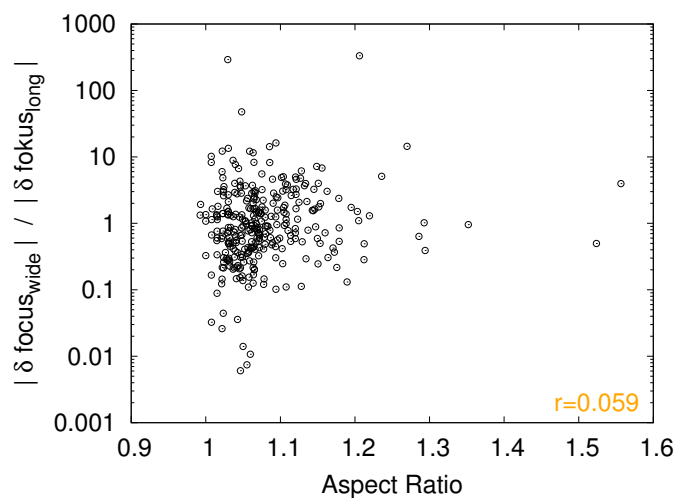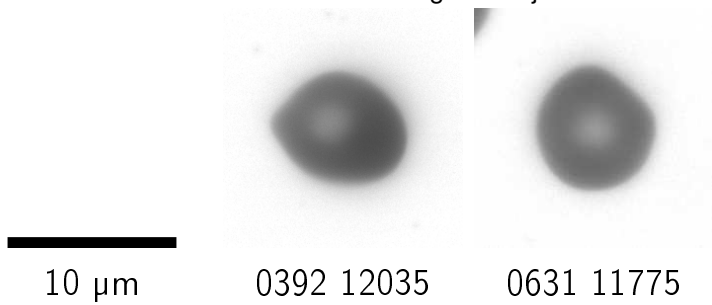

## Donor 6, plasma

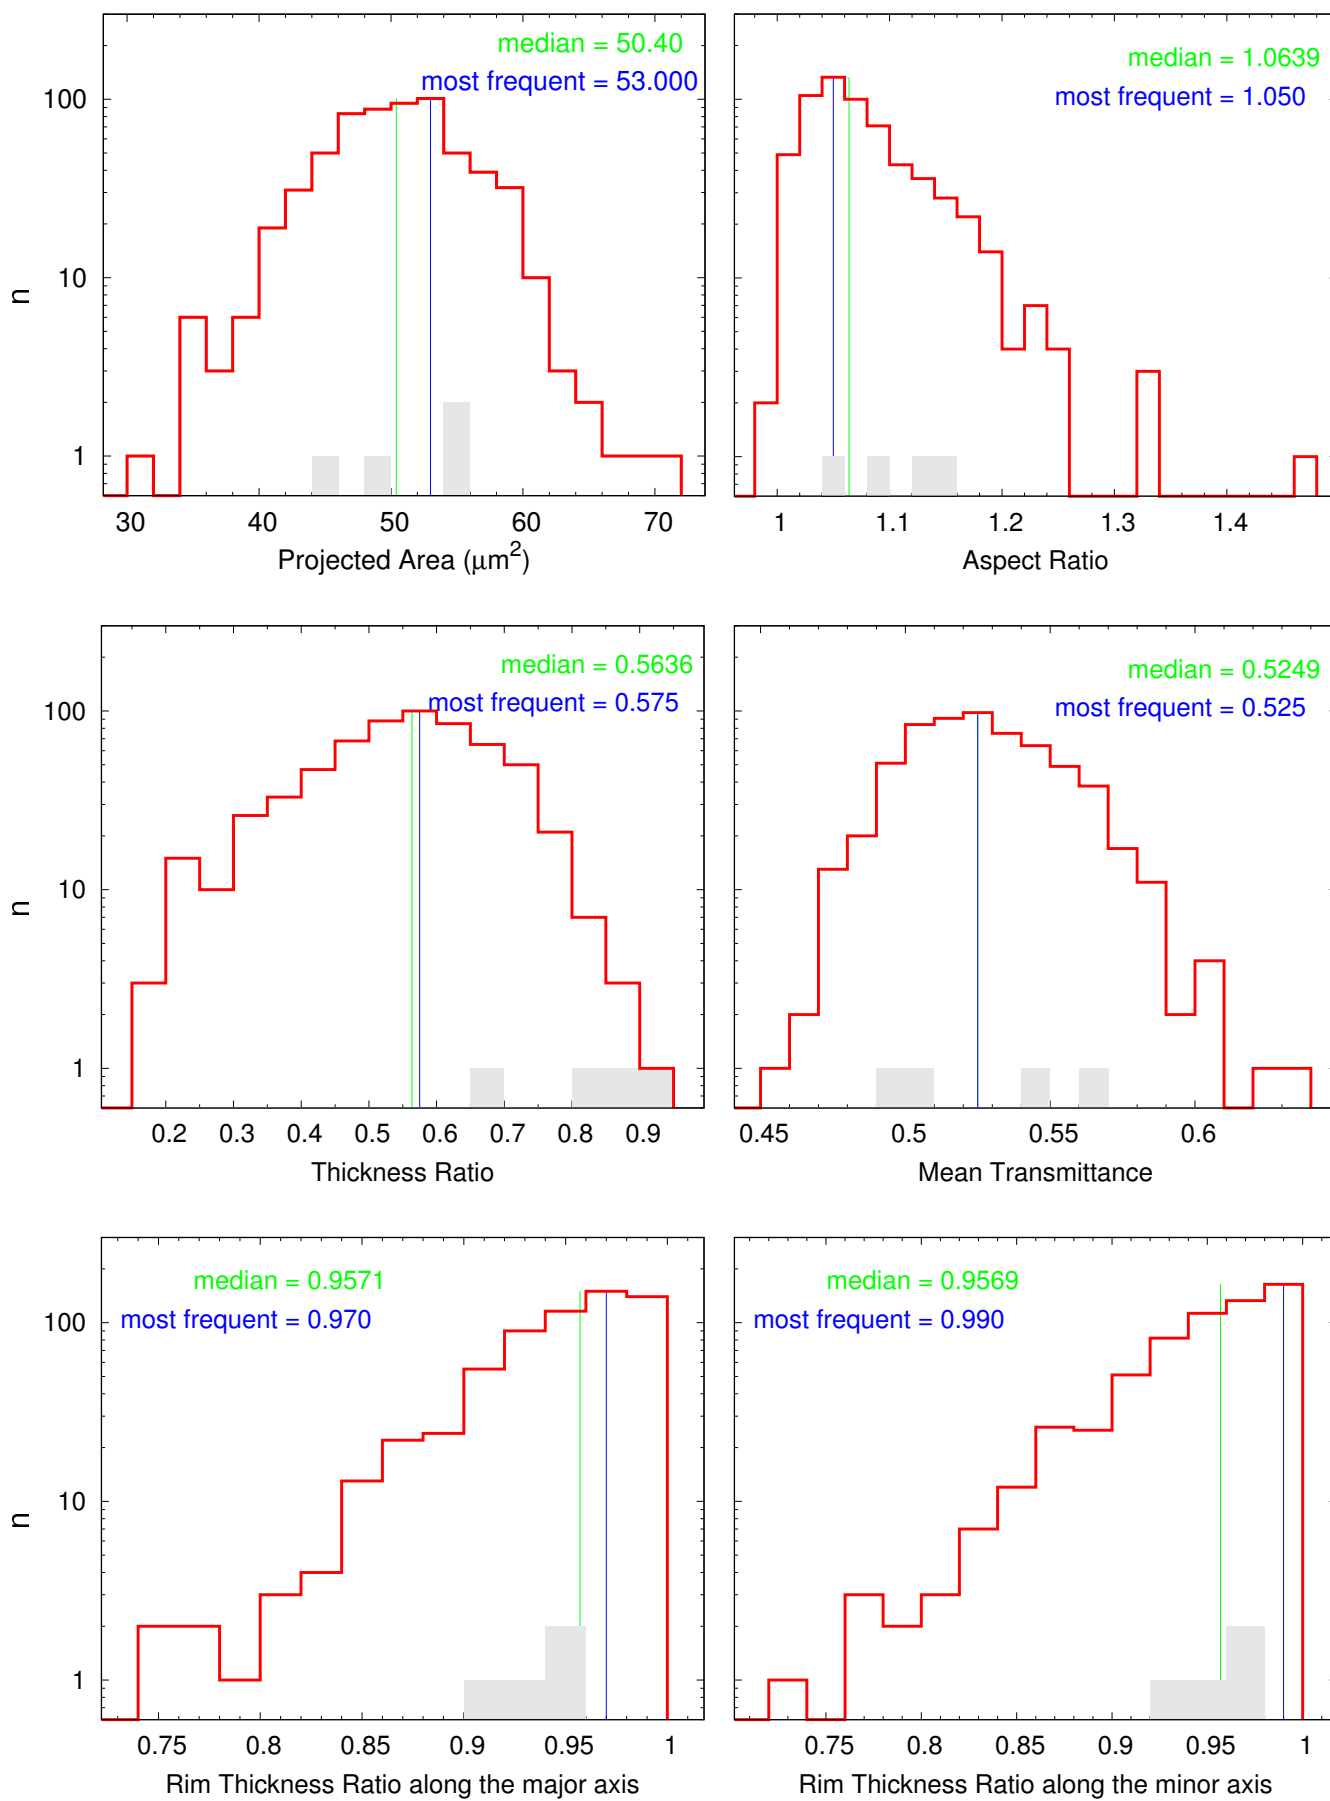

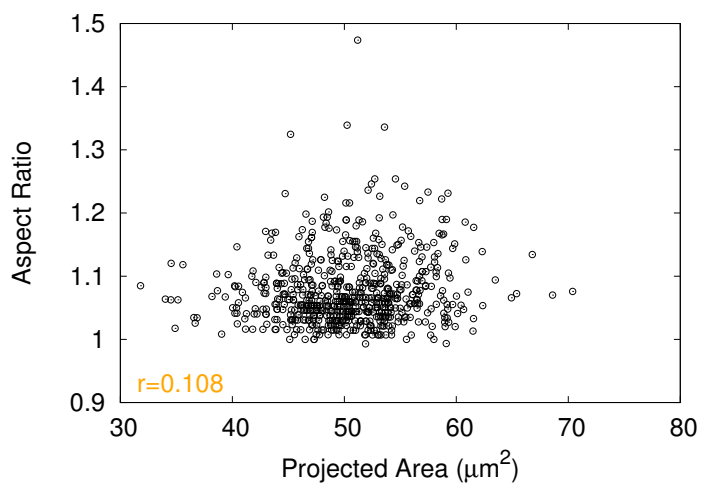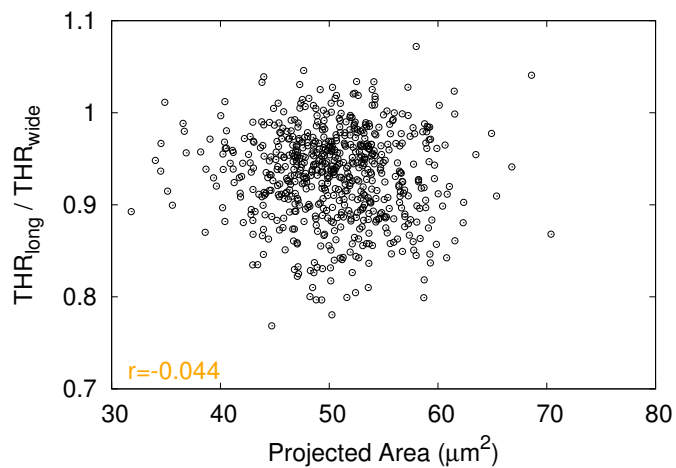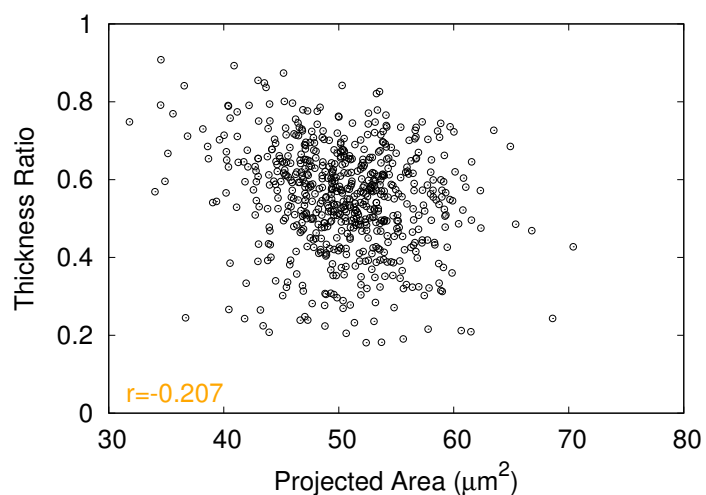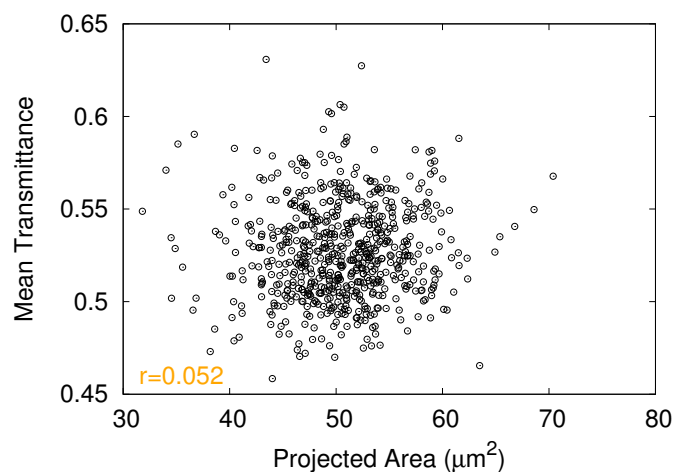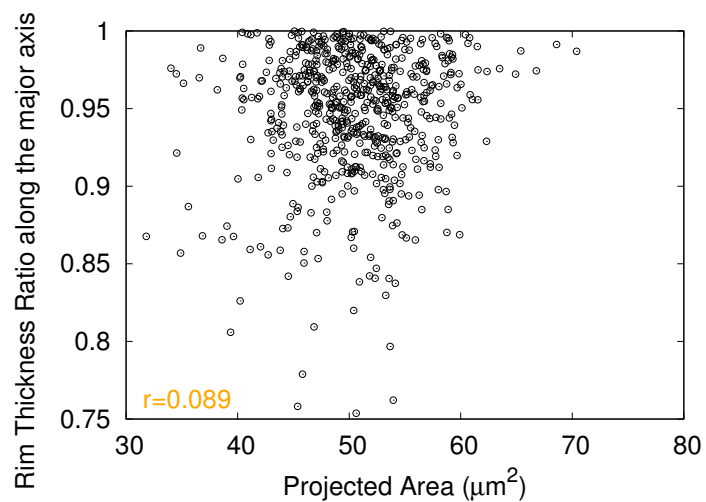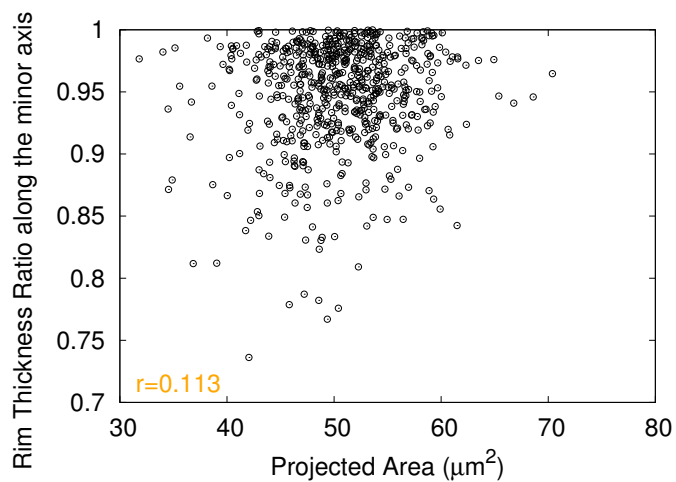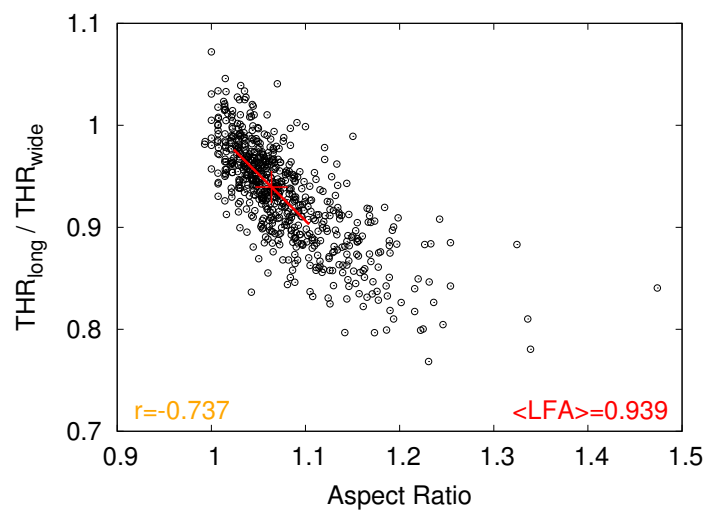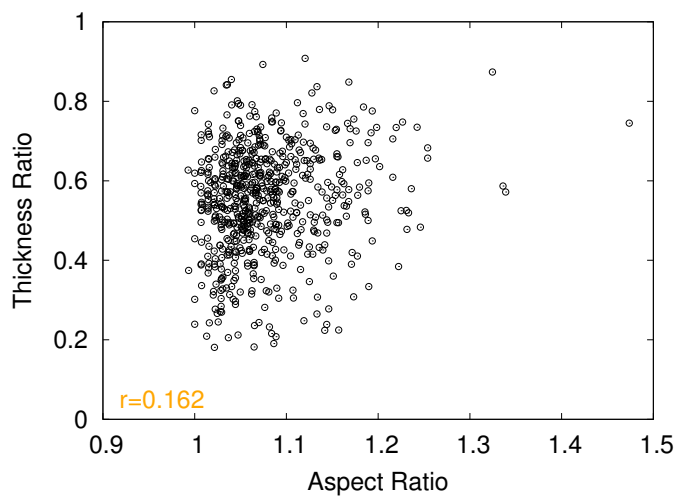

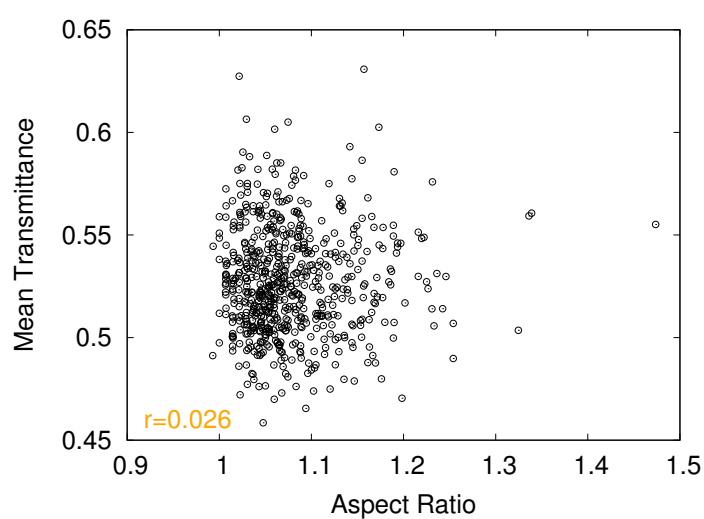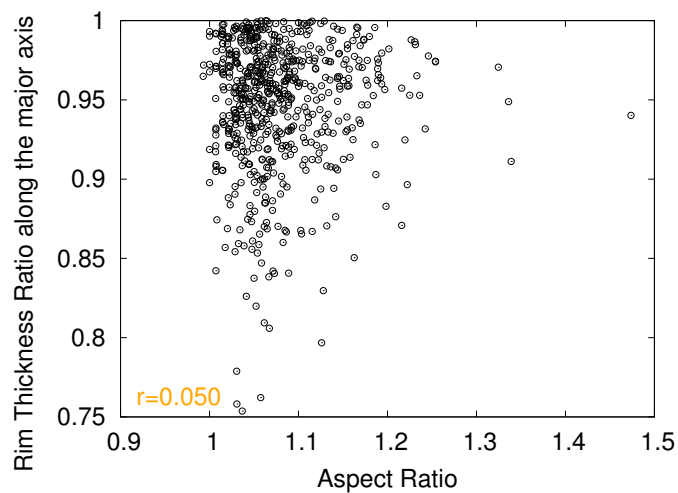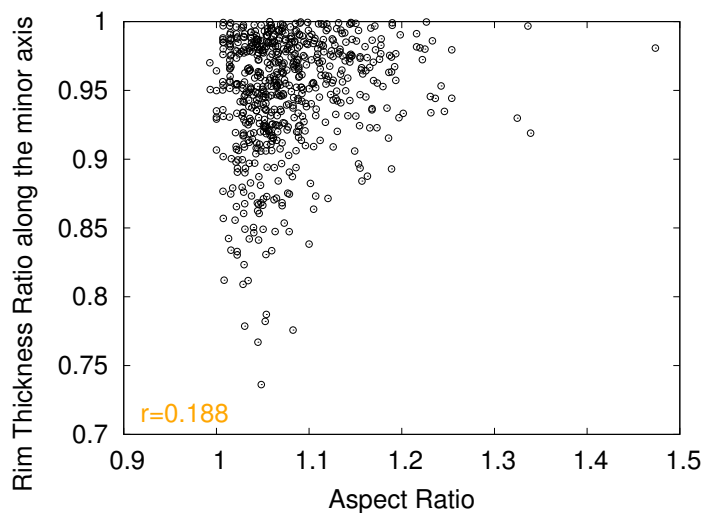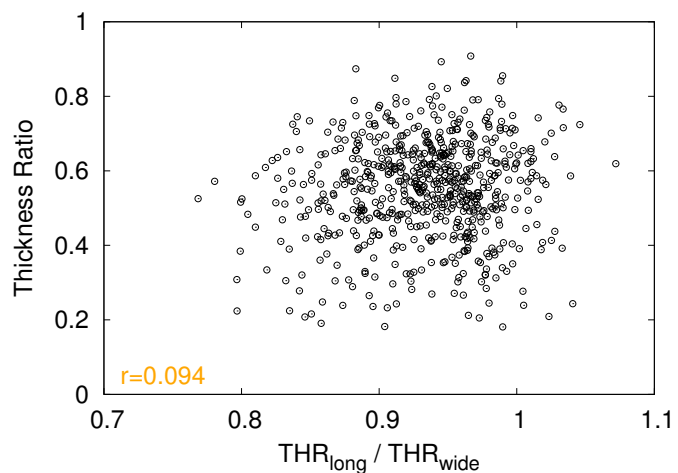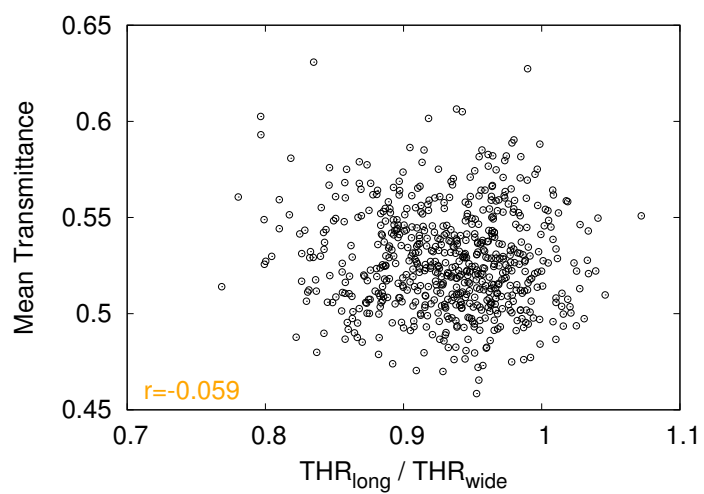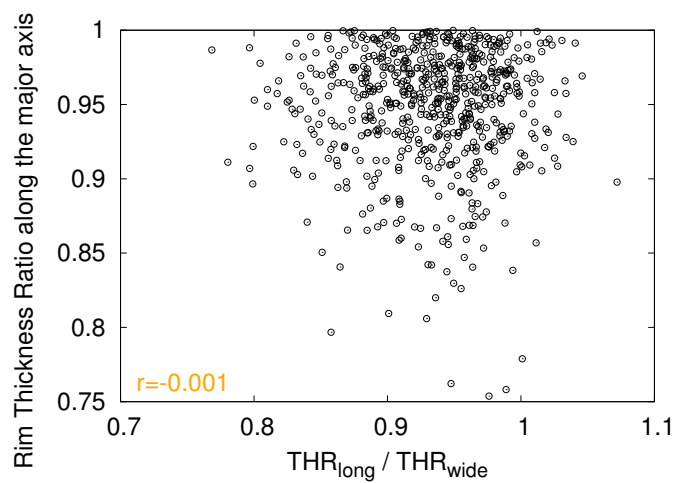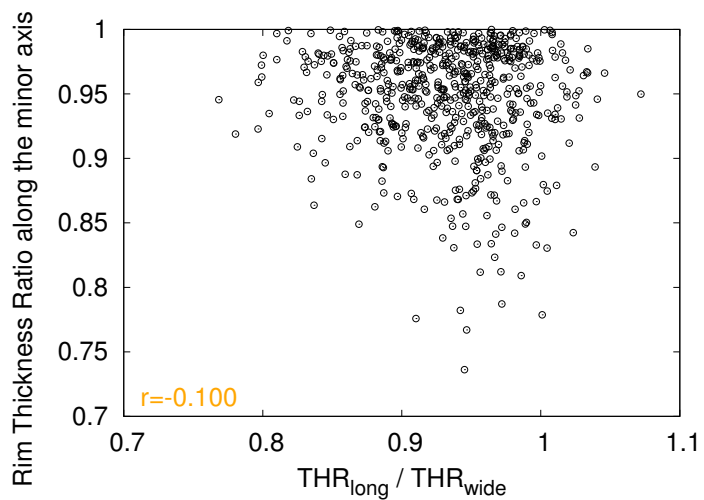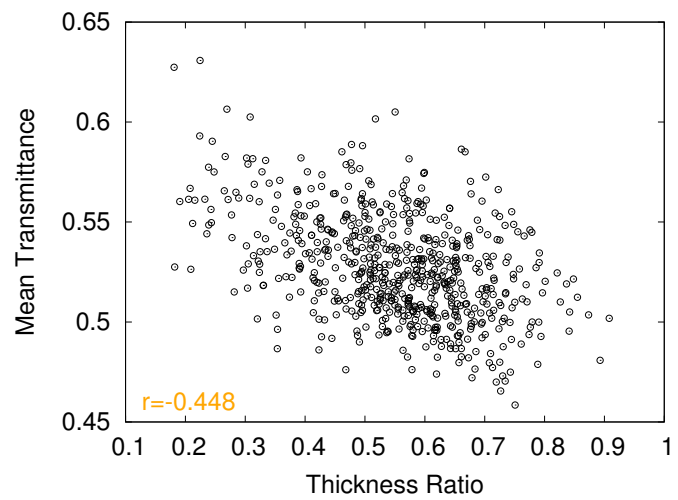

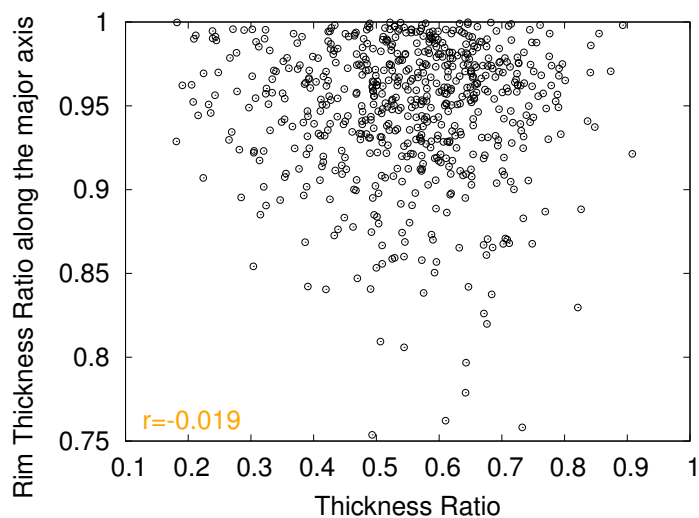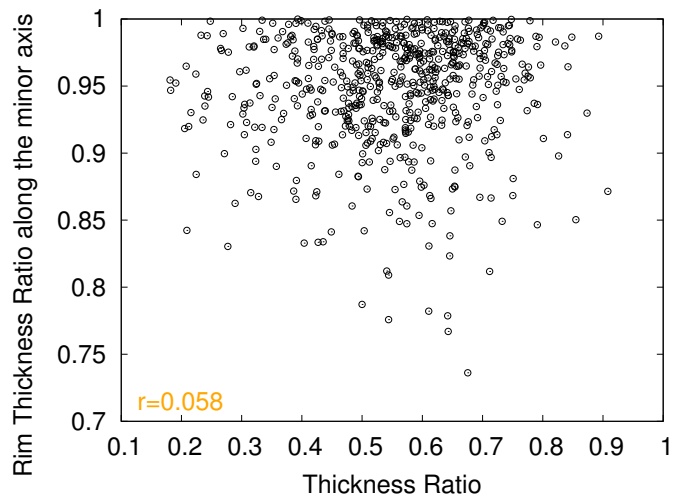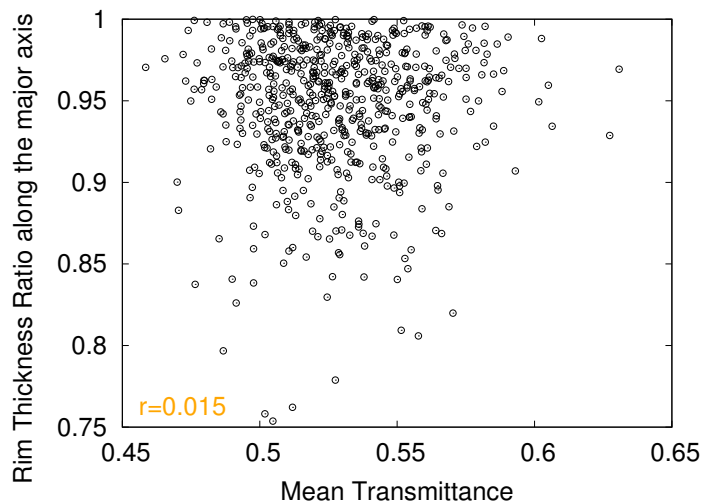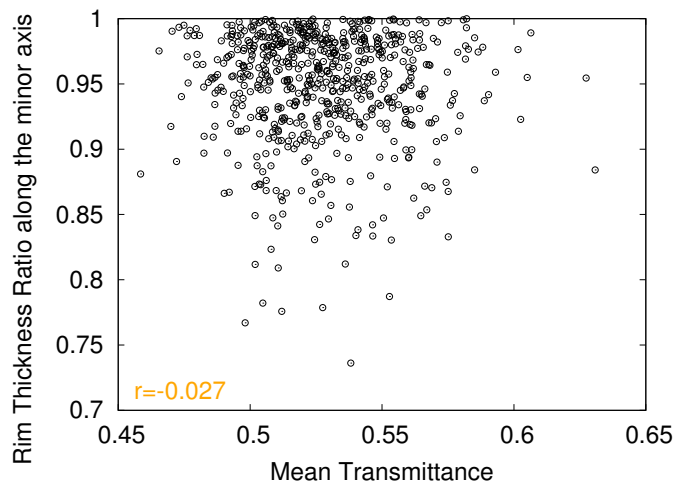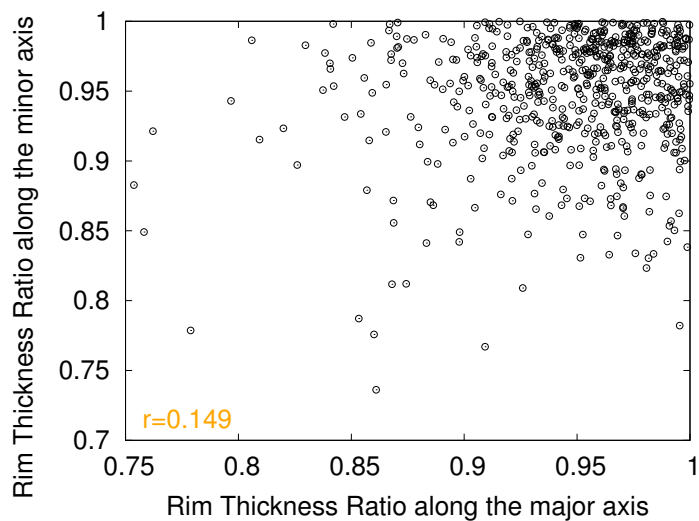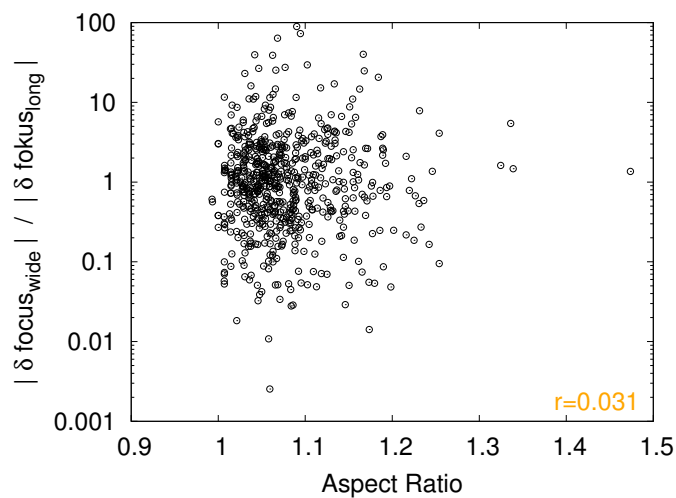

10  $\mu\text{m}$

0924 15632

1449 lala

## Donor 6, serum washed

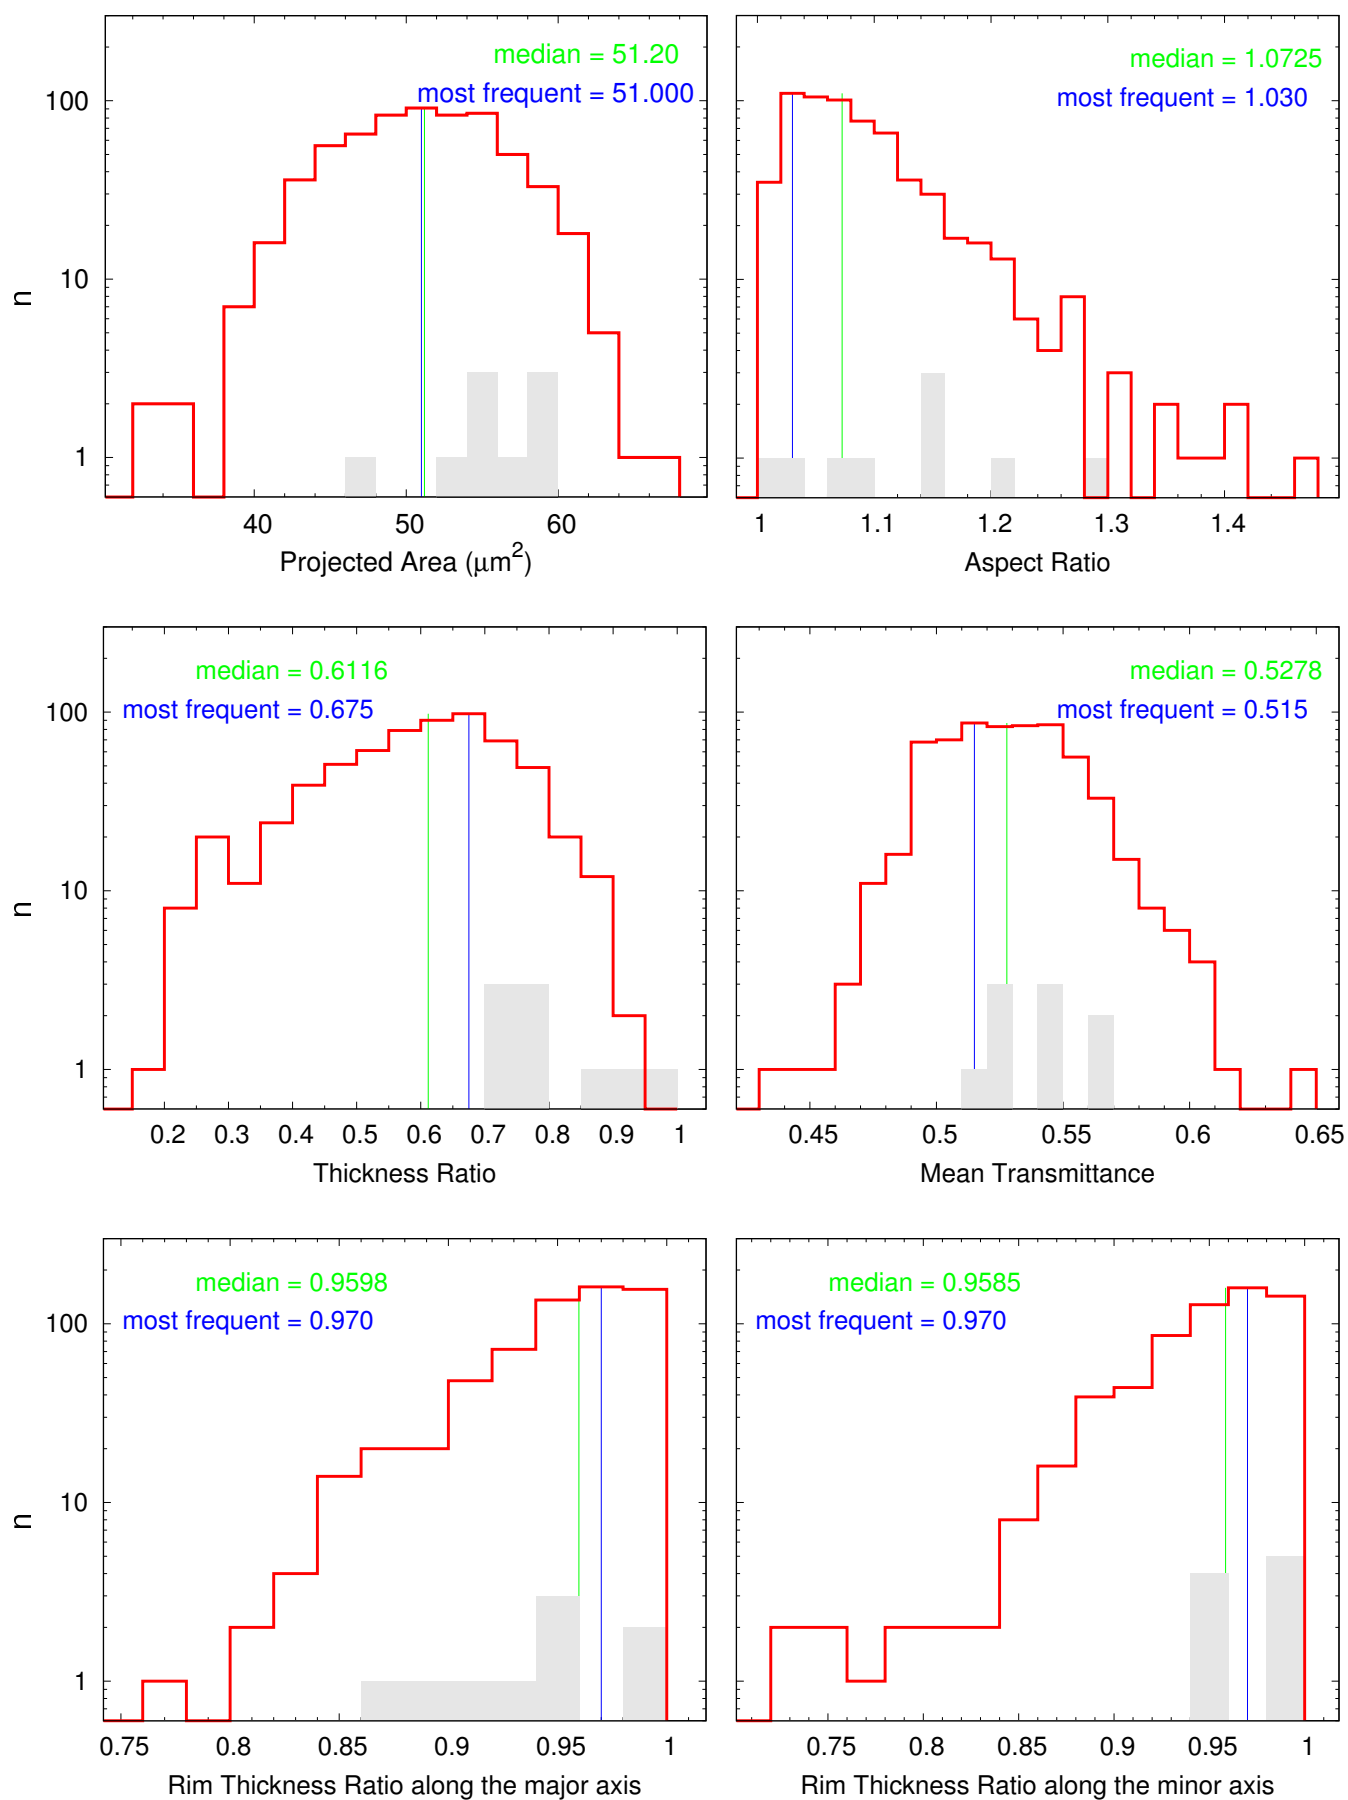



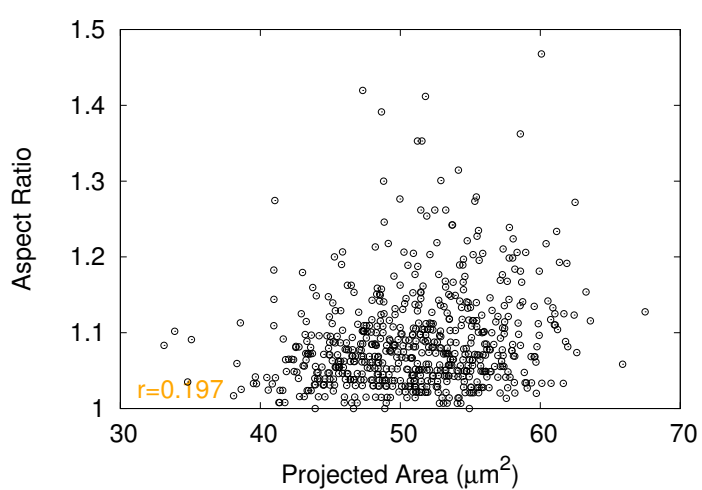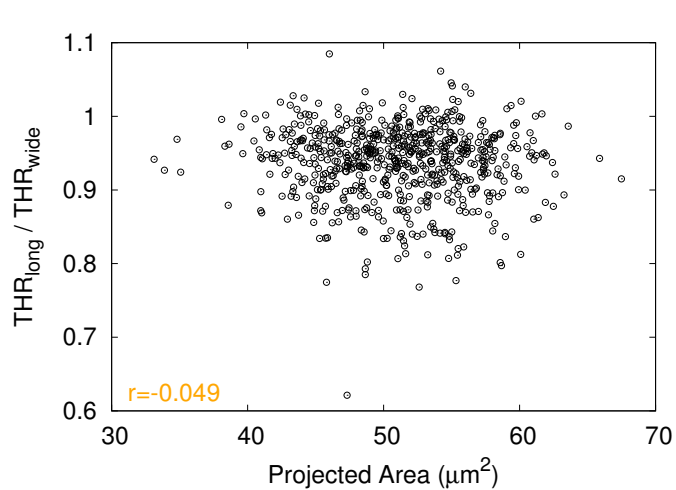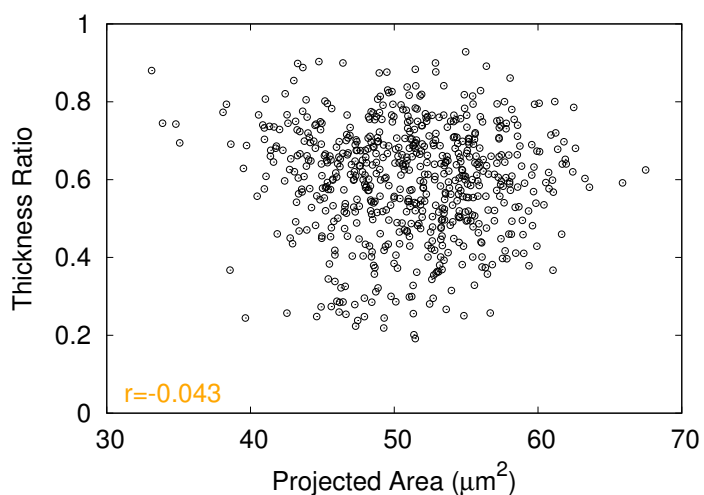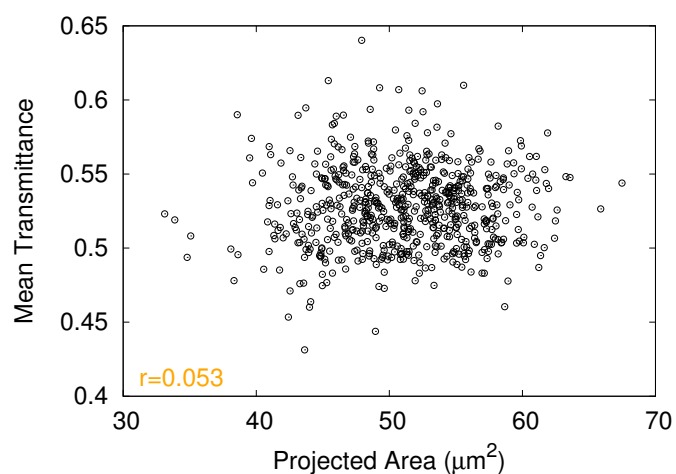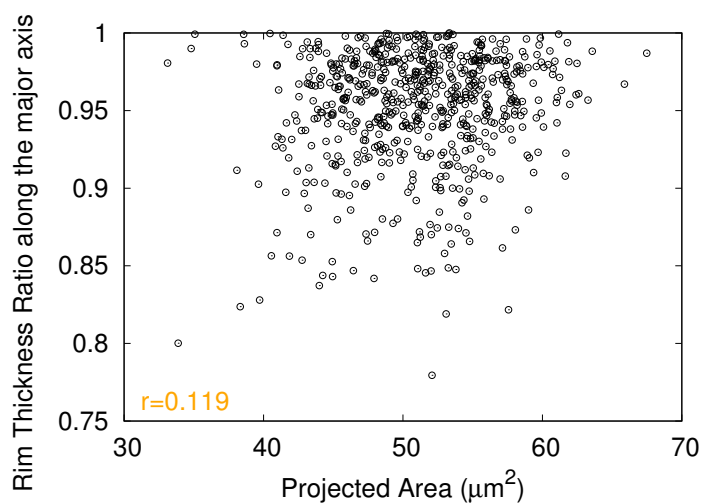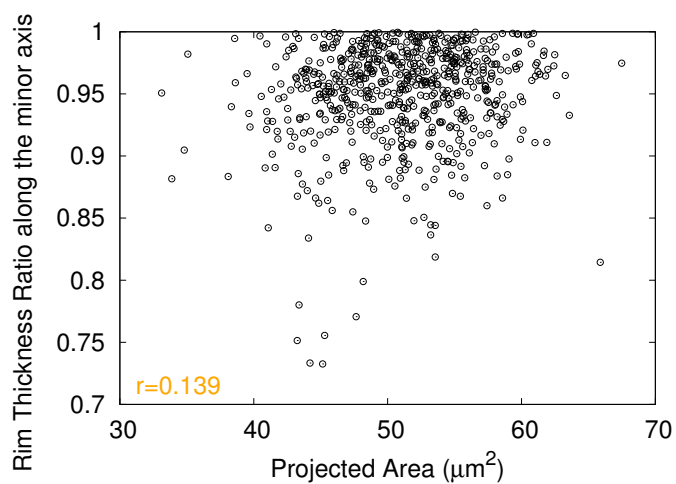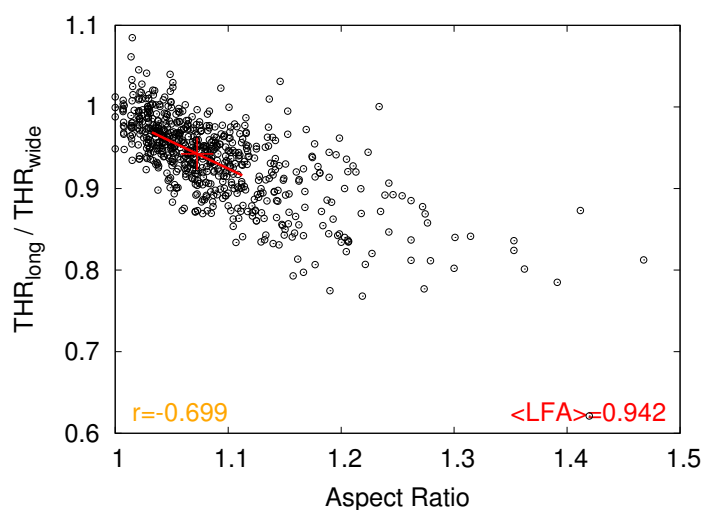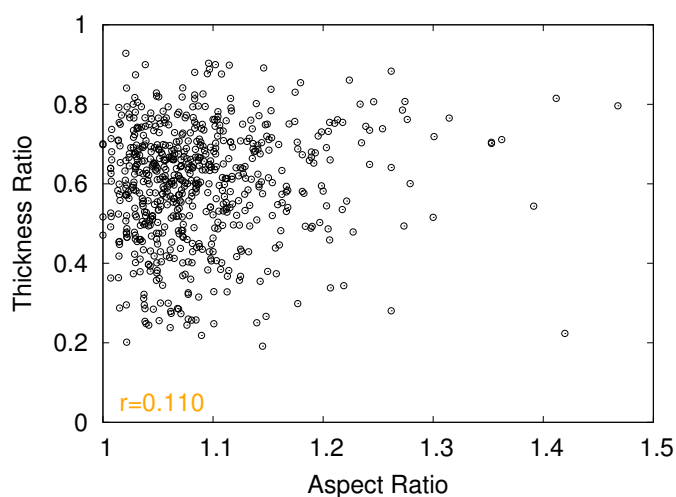

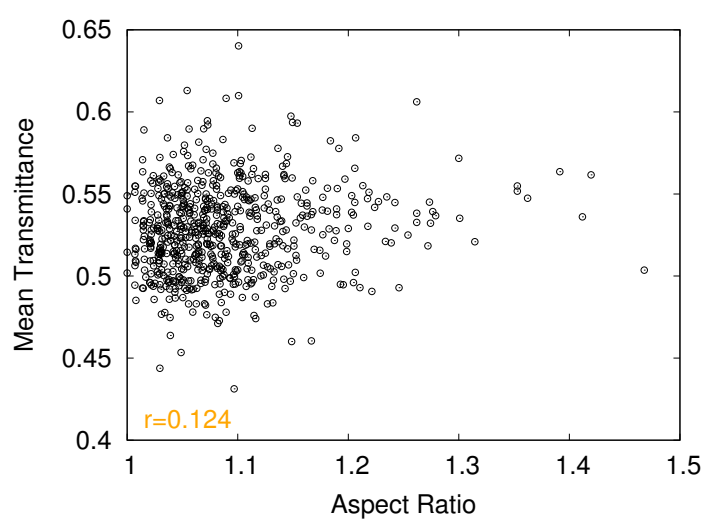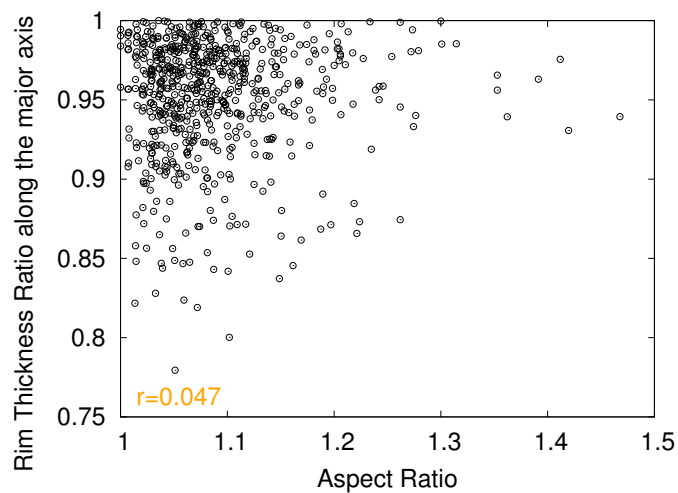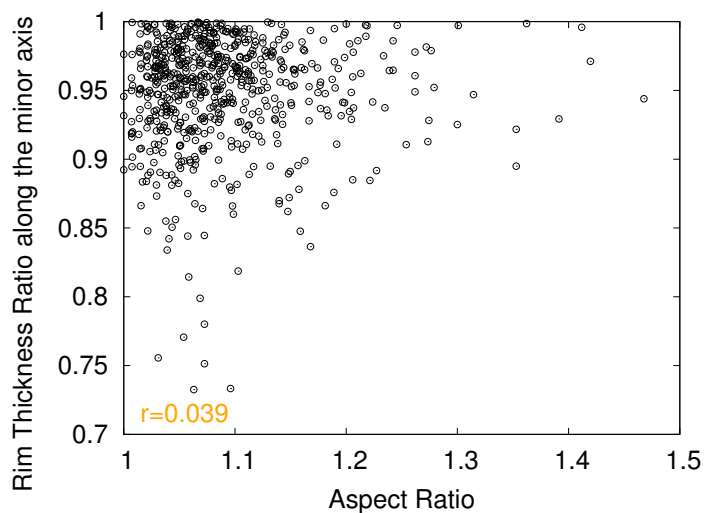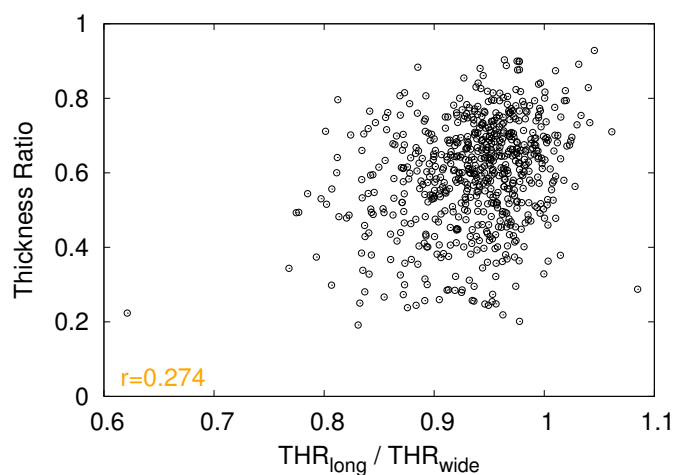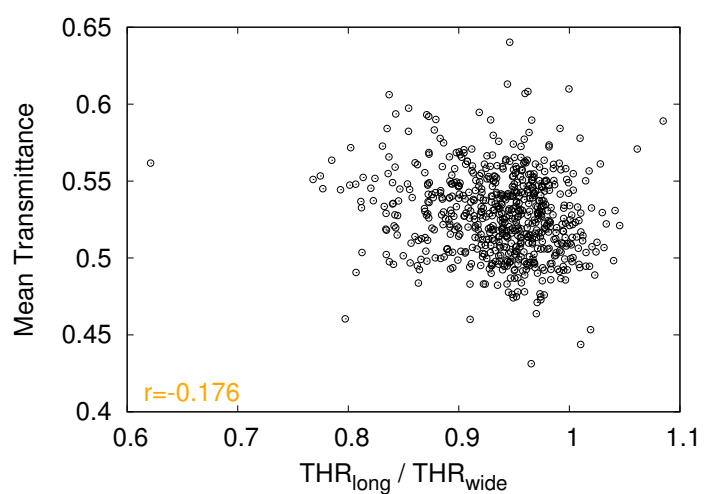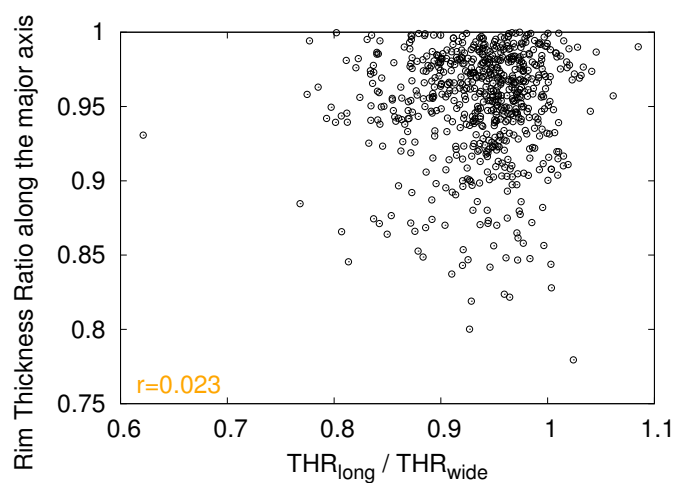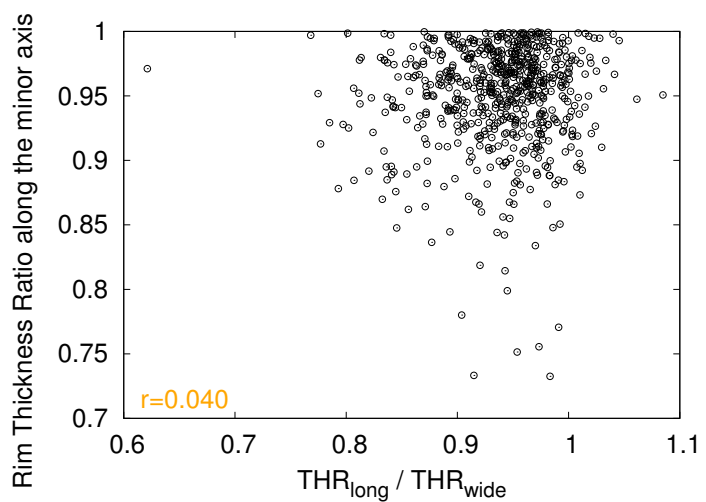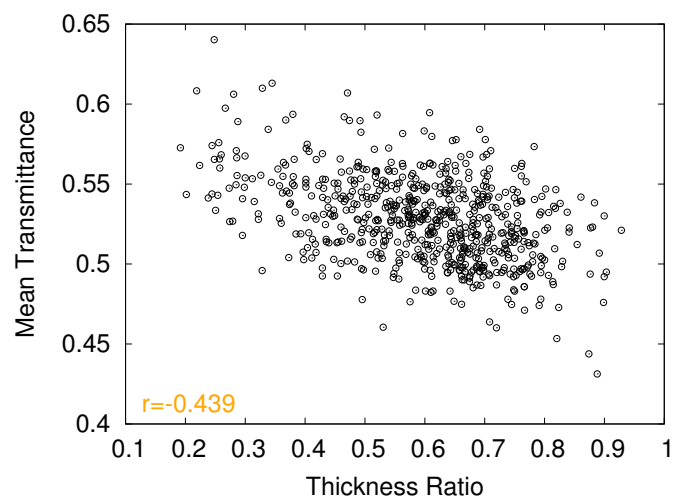

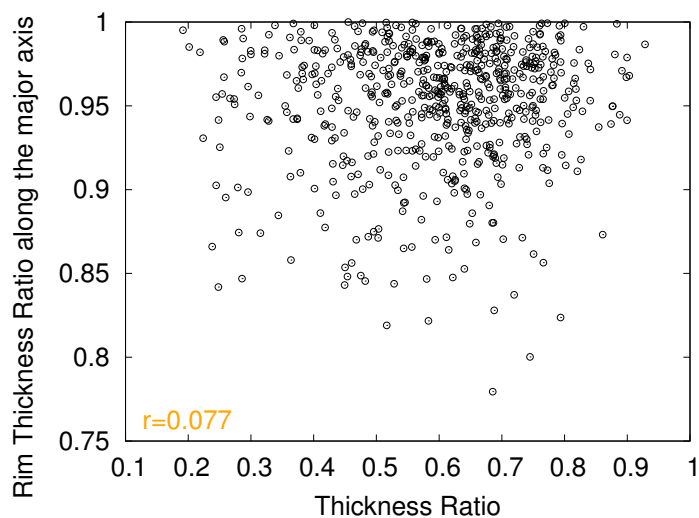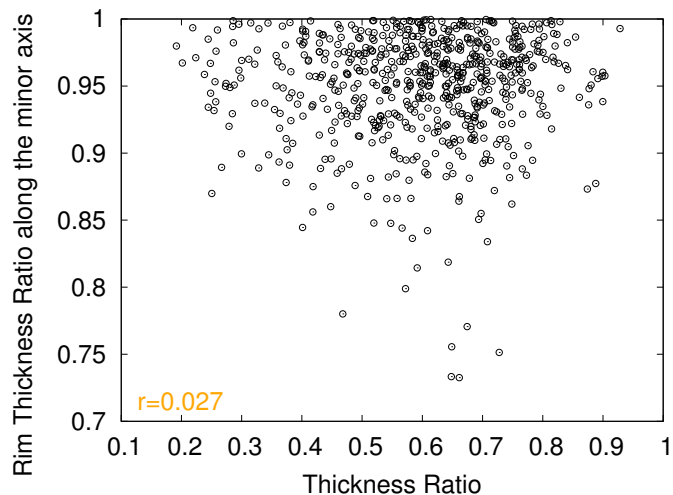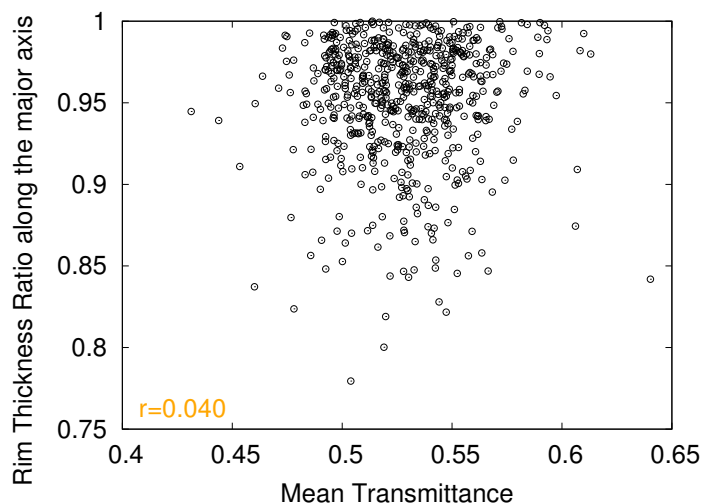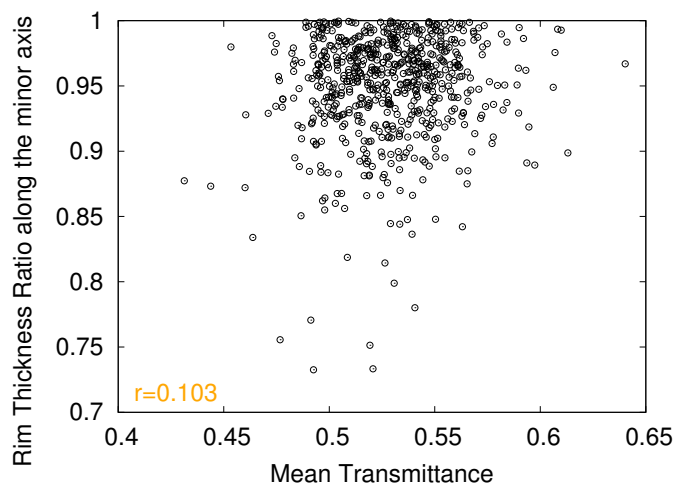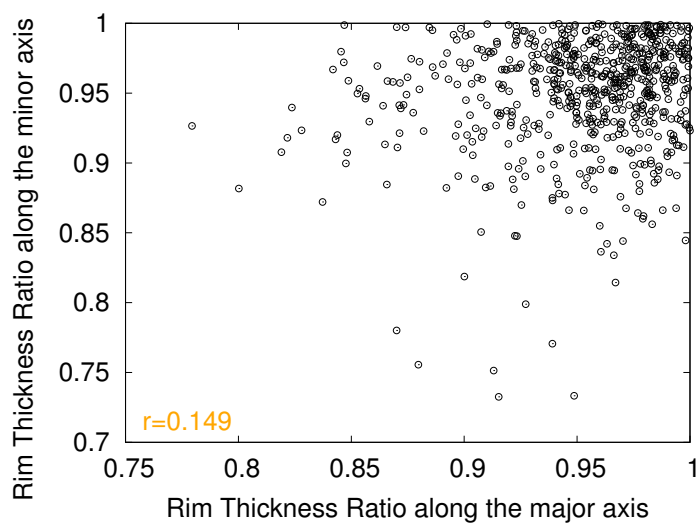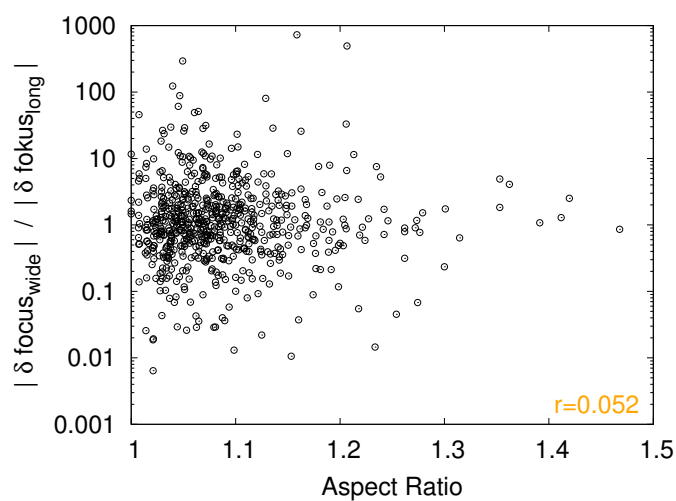

10  $\mu\text{m}$

1190 126

1338 143

1634 174

1279 137

1294 0.8118

## Donor 7, plasma

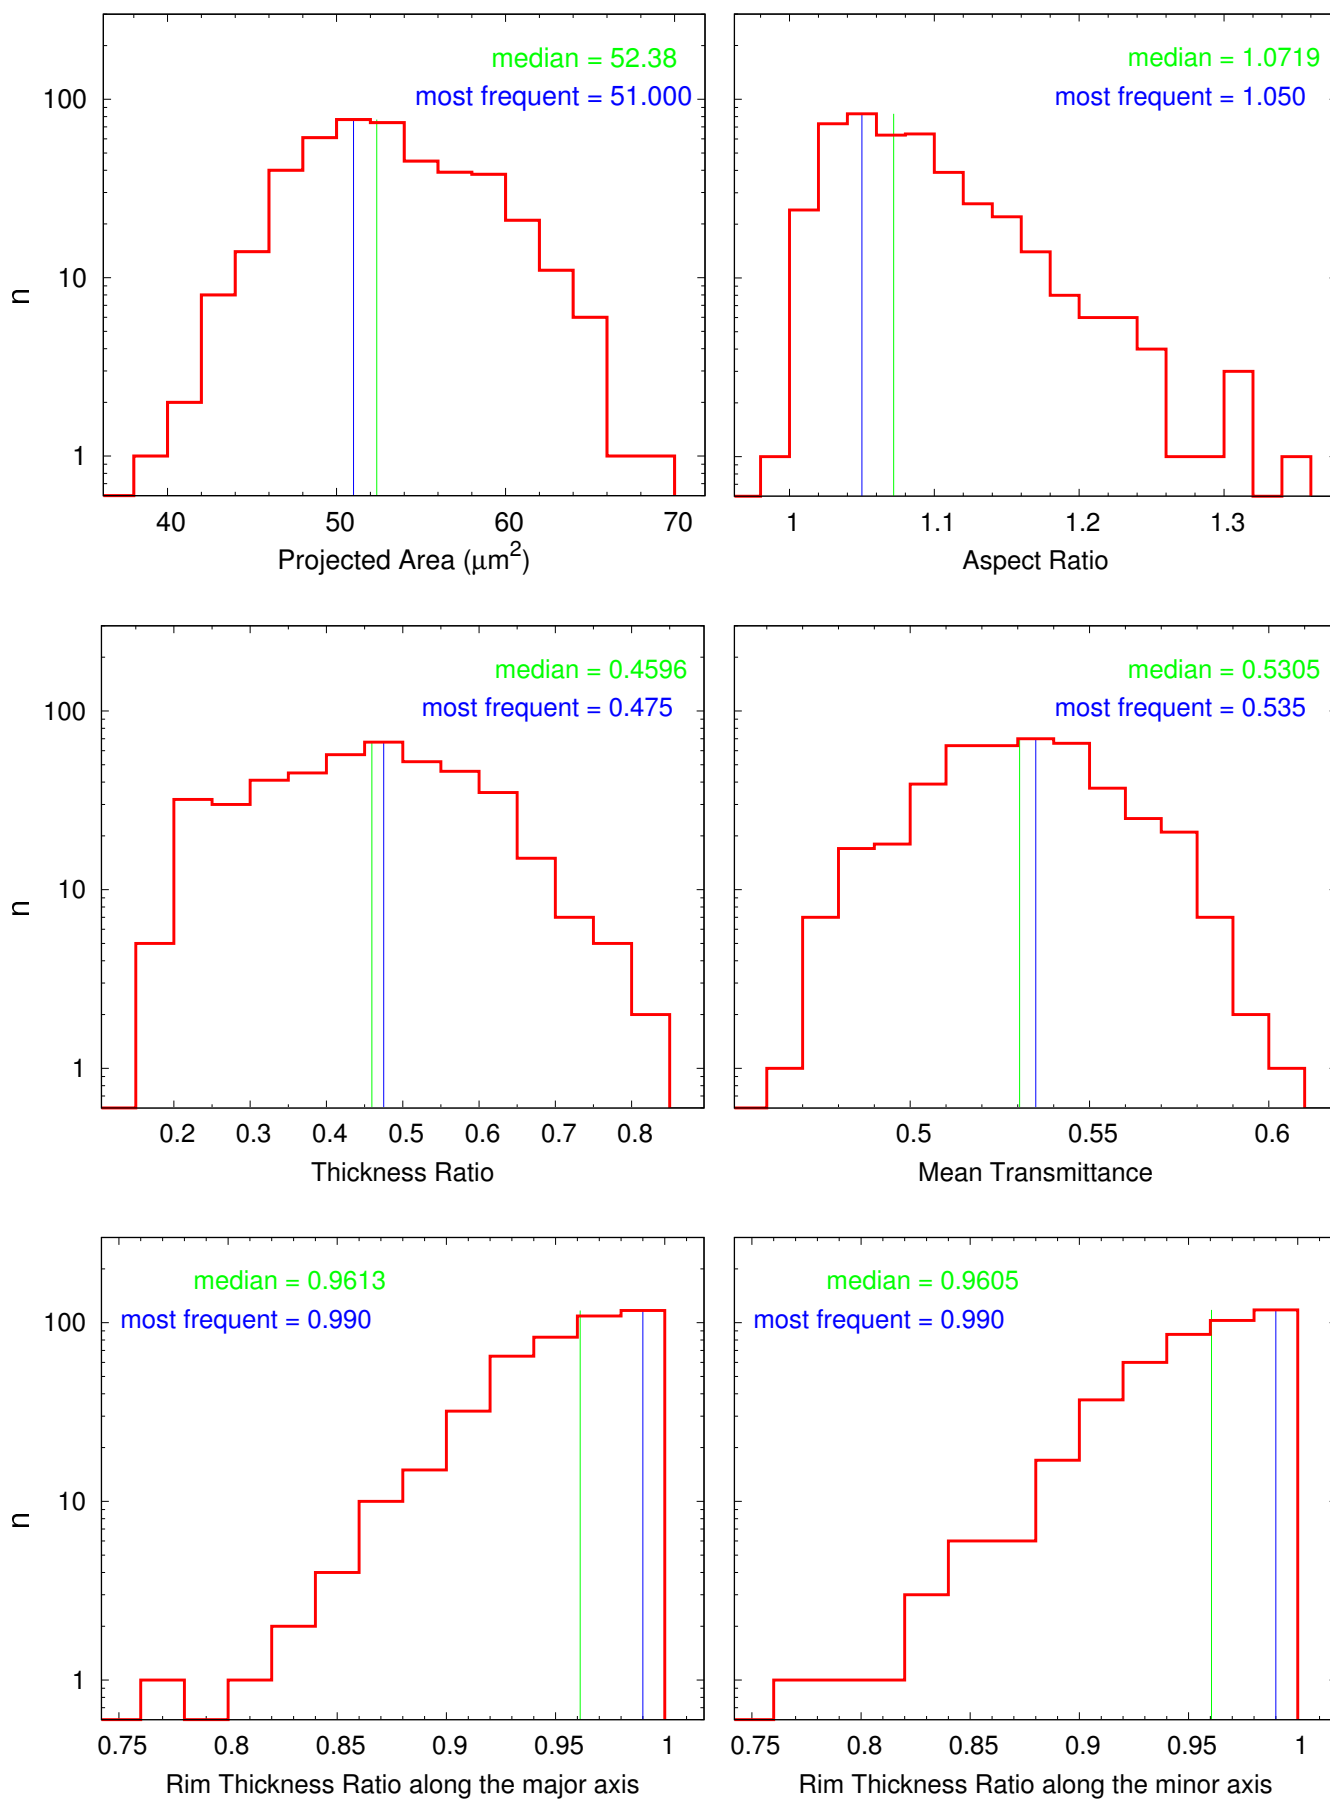

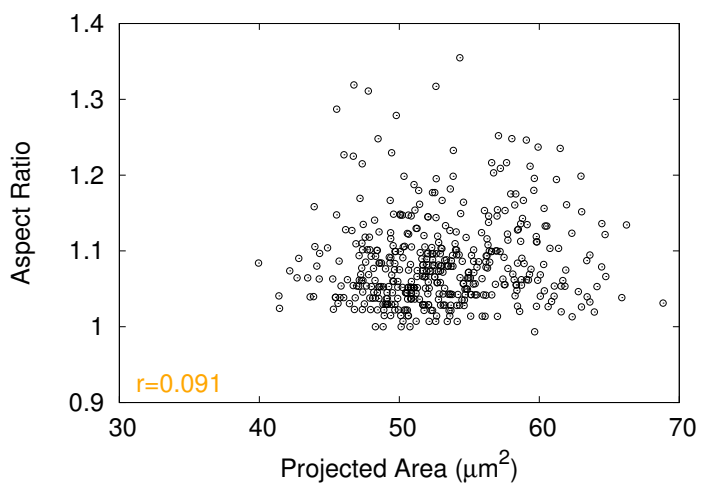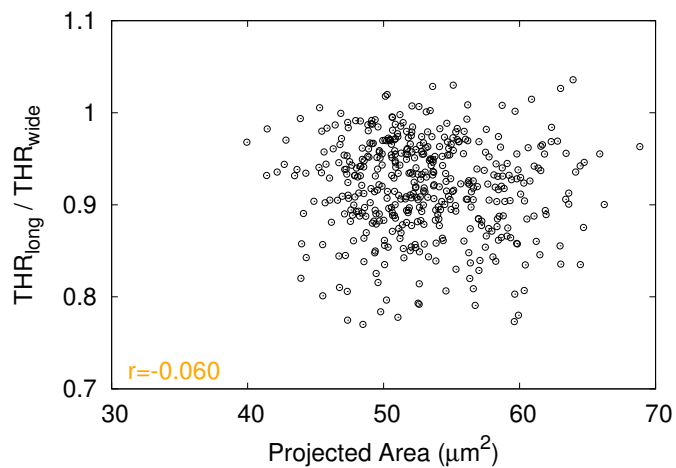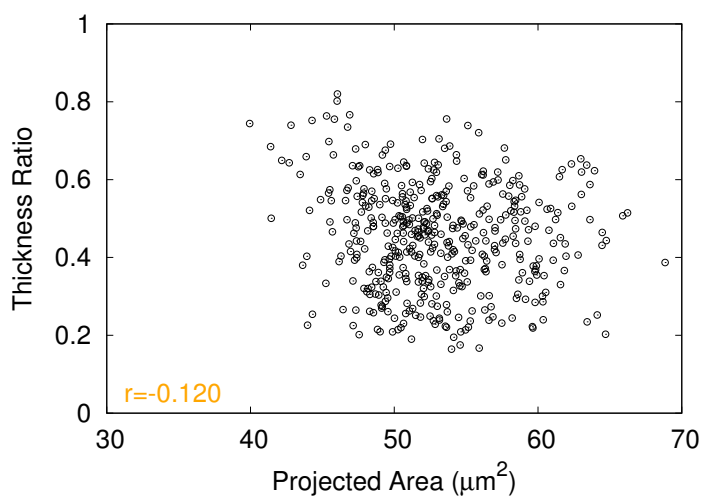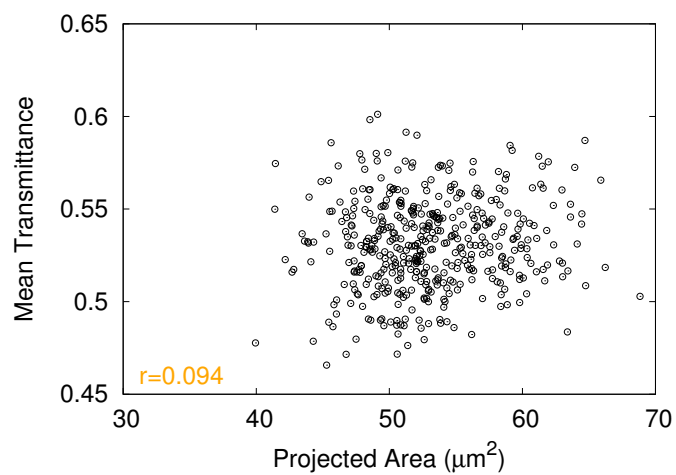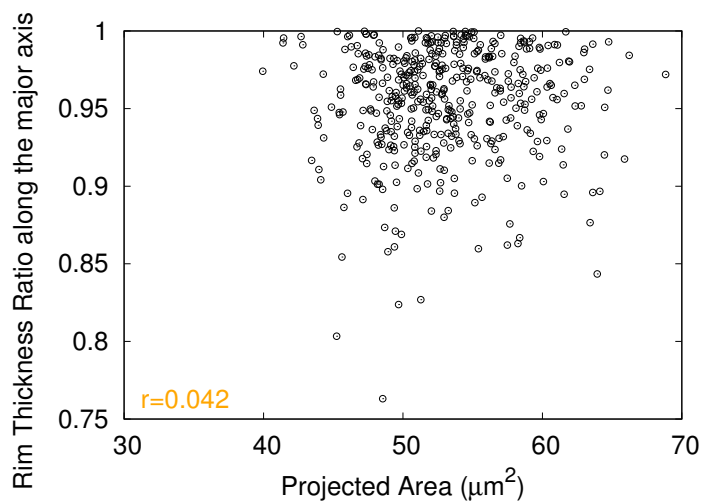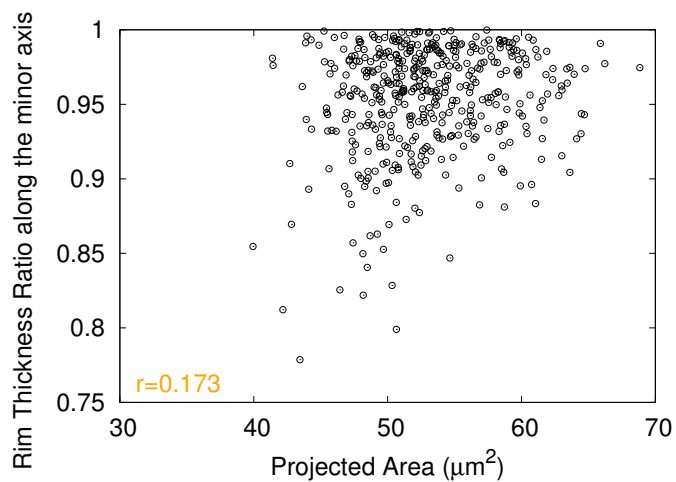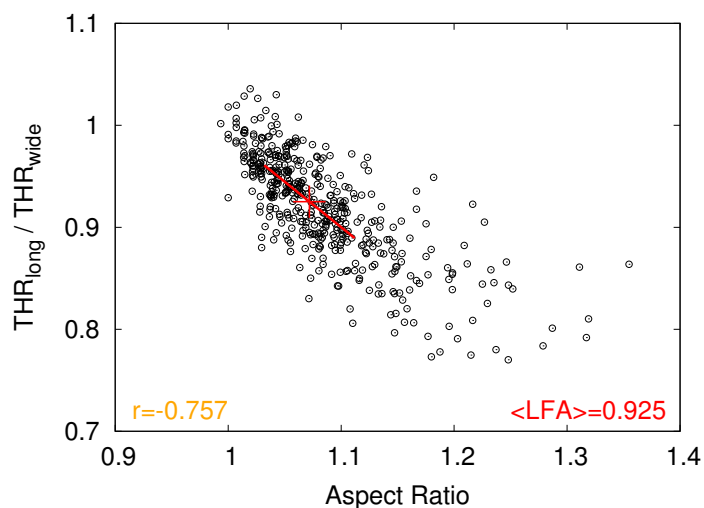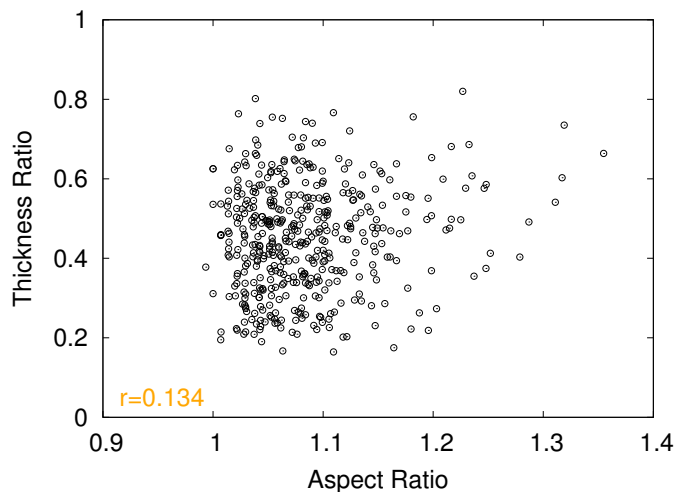

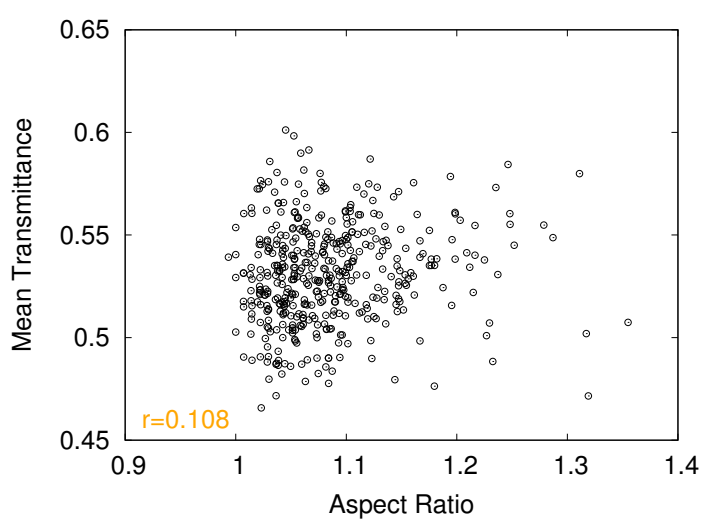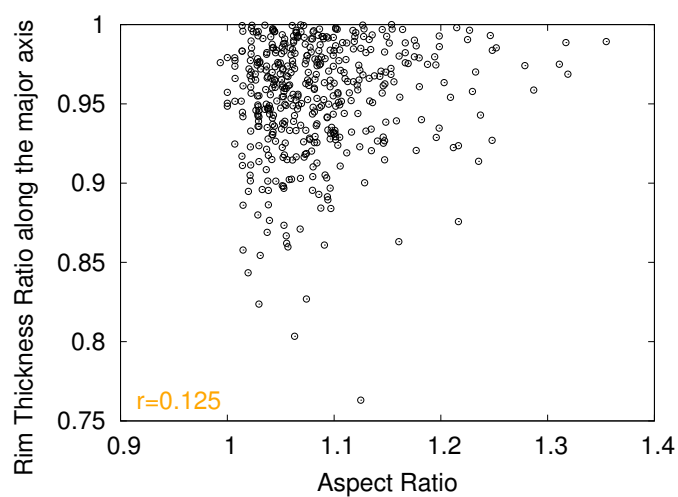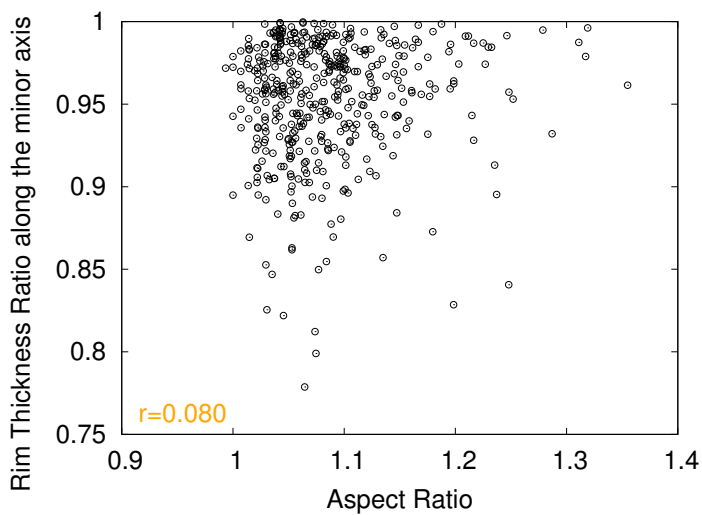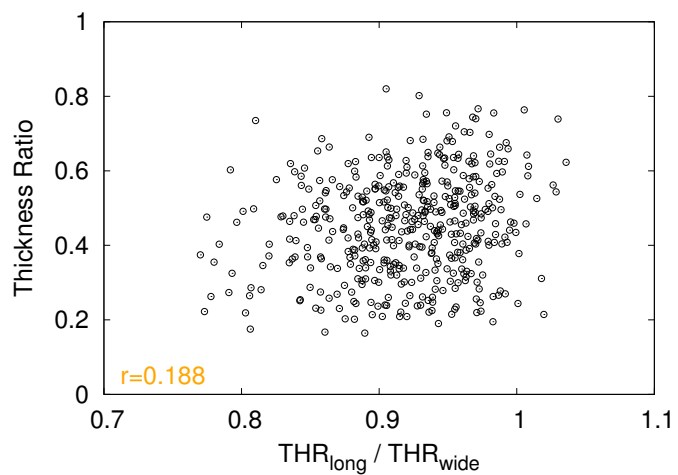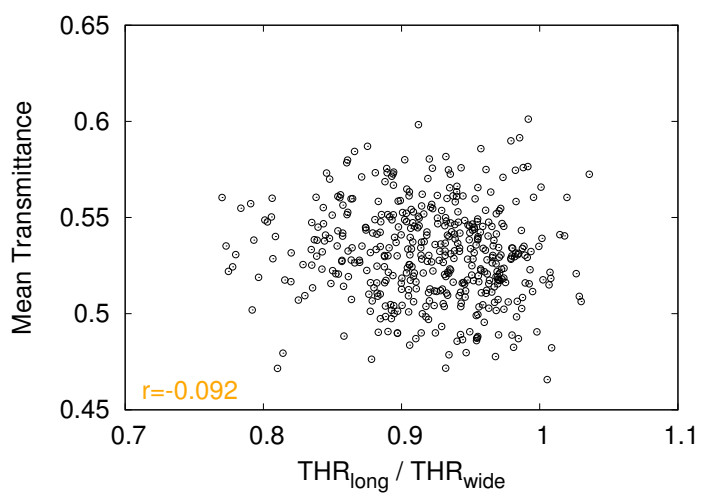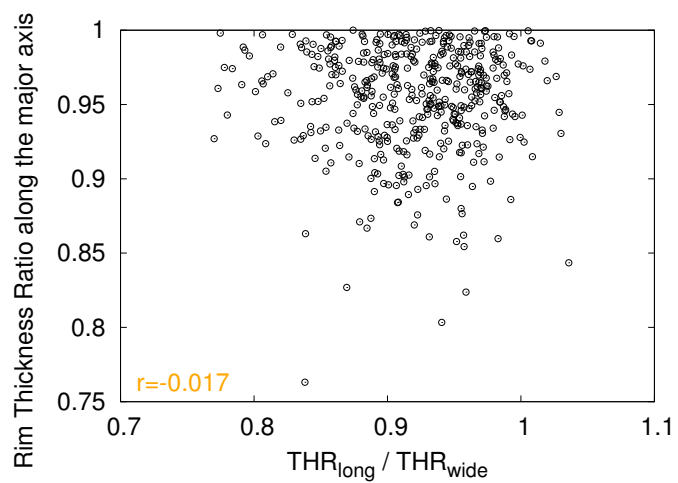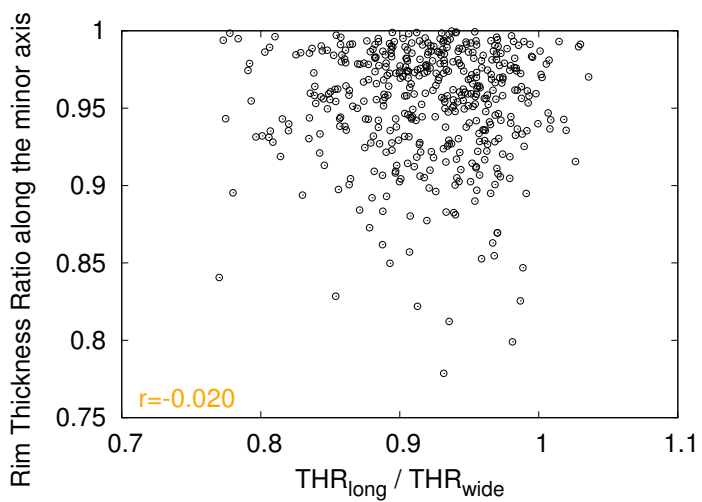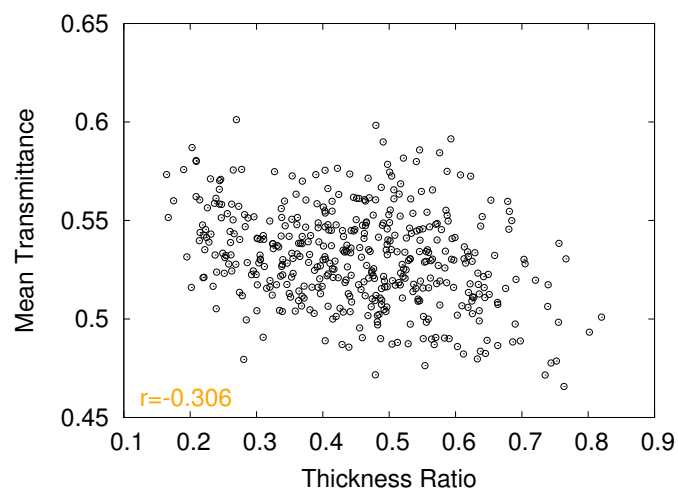



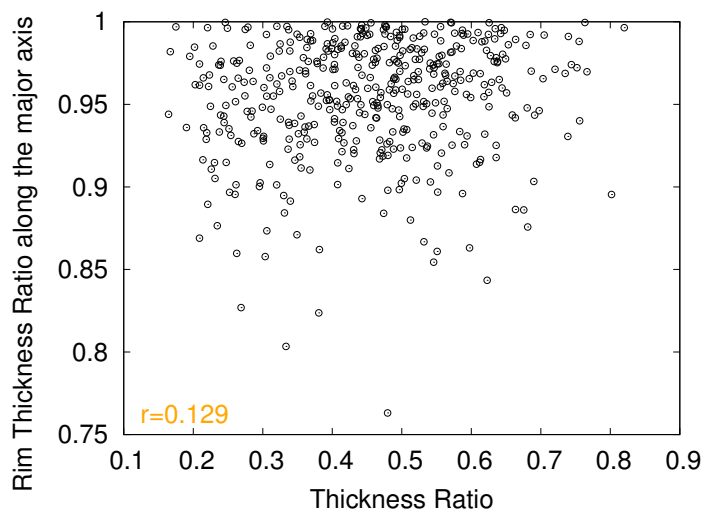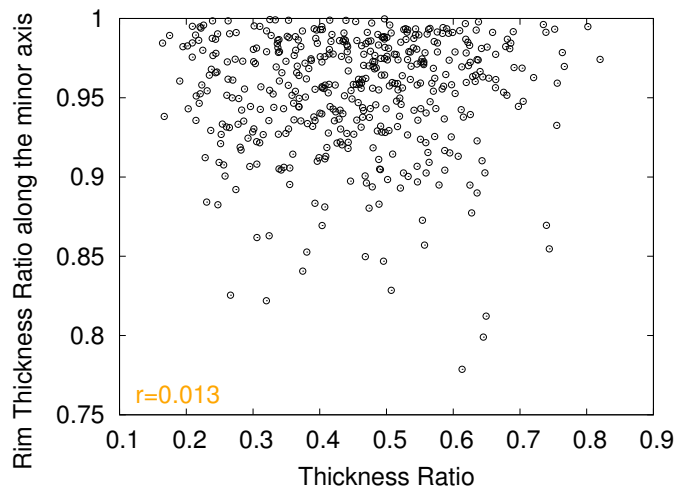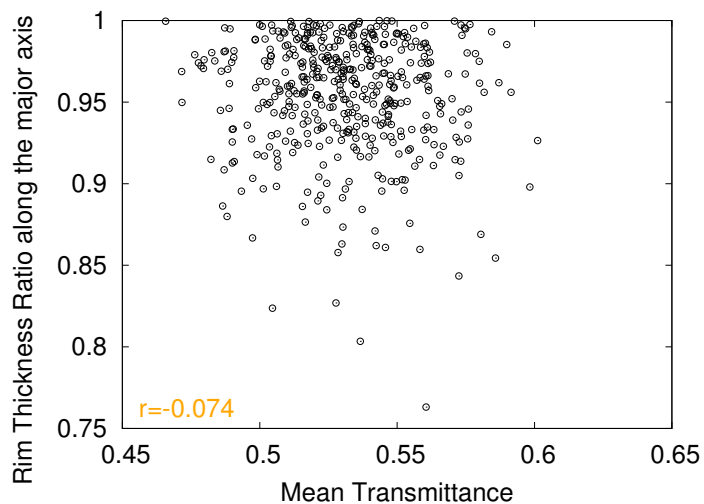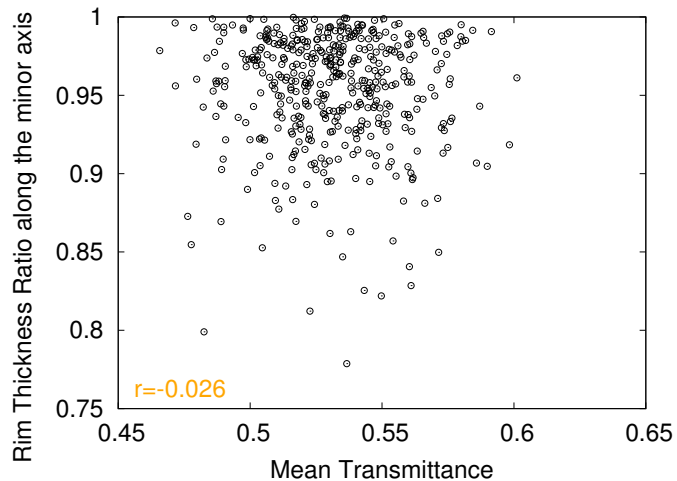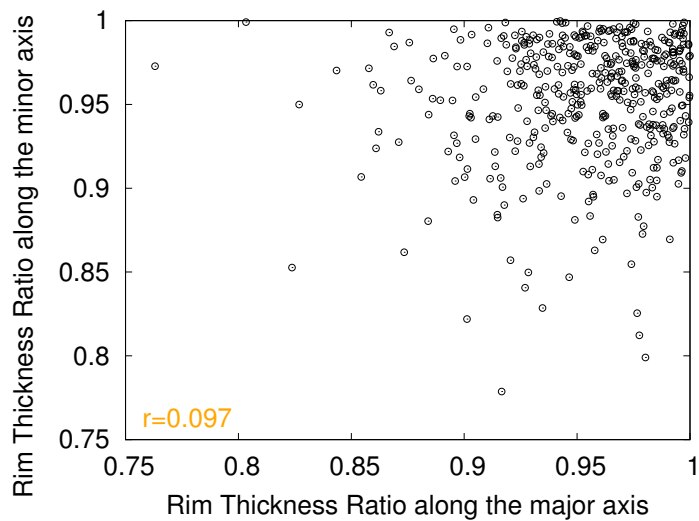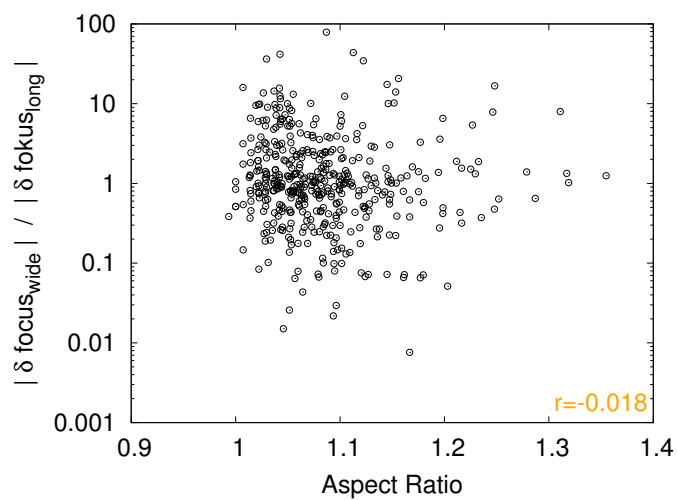

10  $\mu\text{m}$

0329 060

1012 191

0331 ob

0369 068

## Donor 7, serum washed

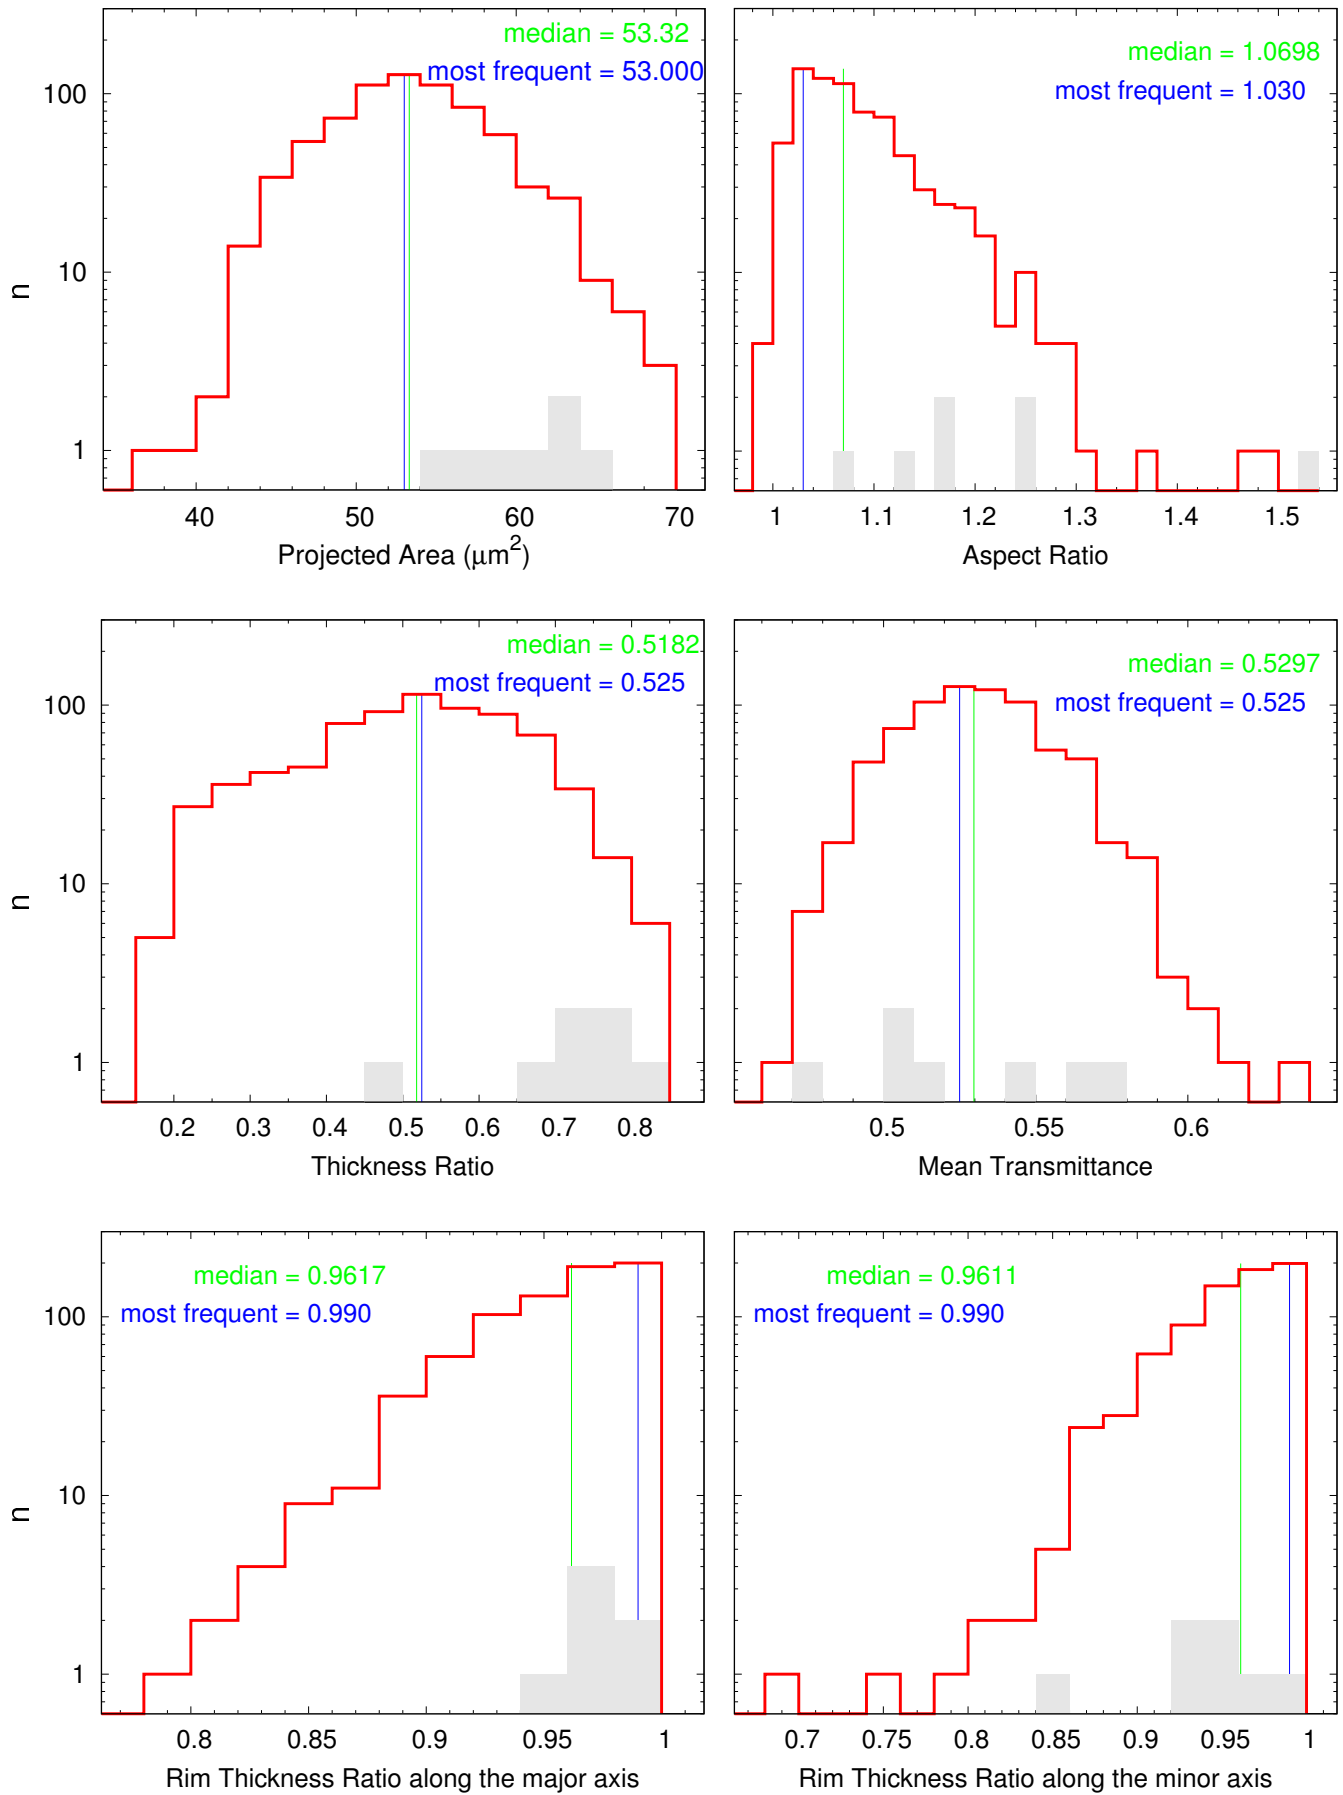

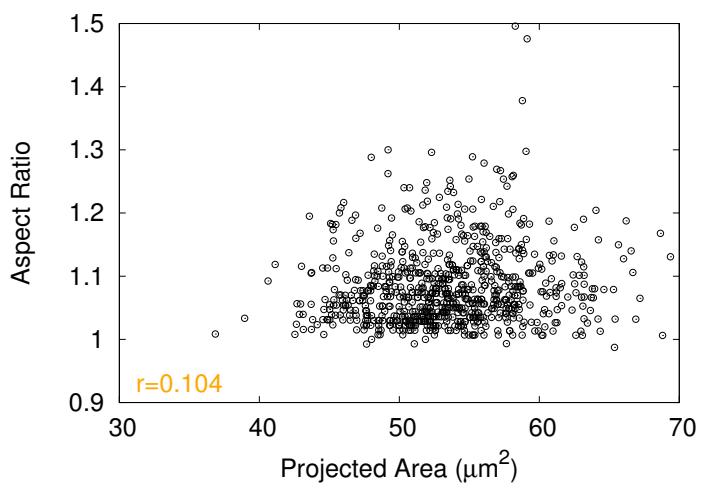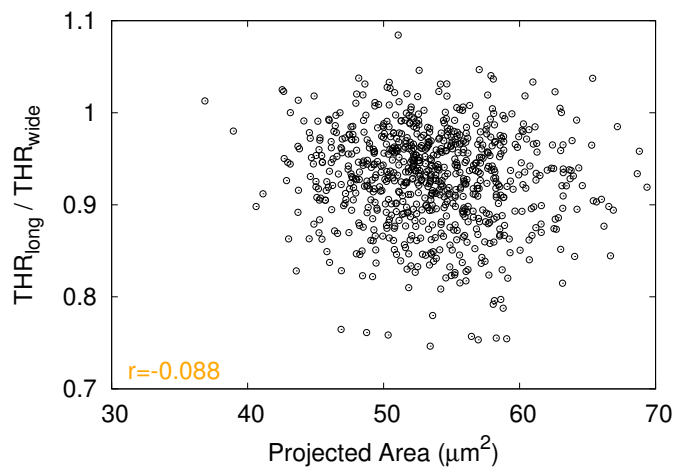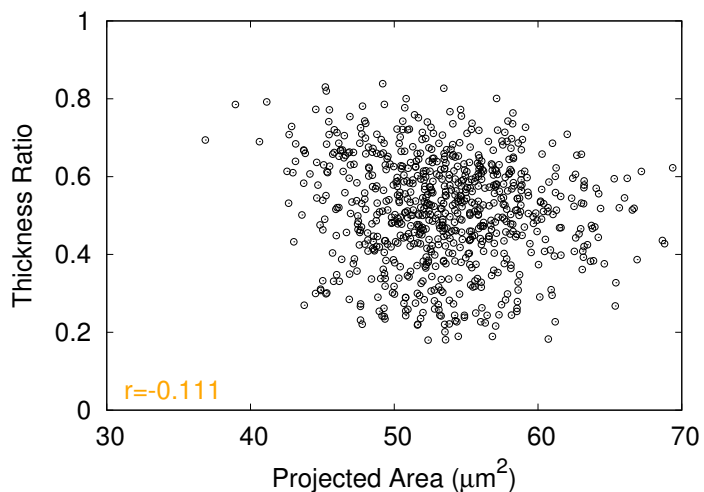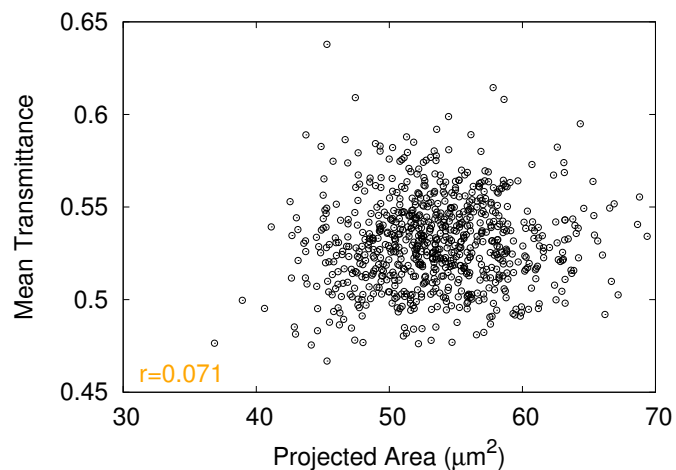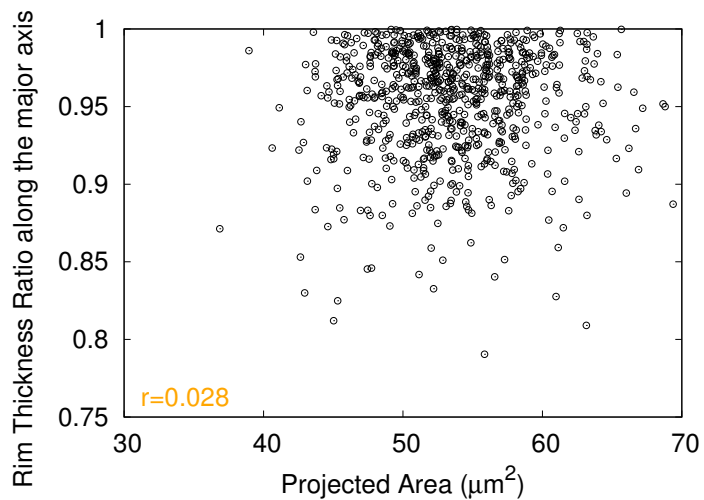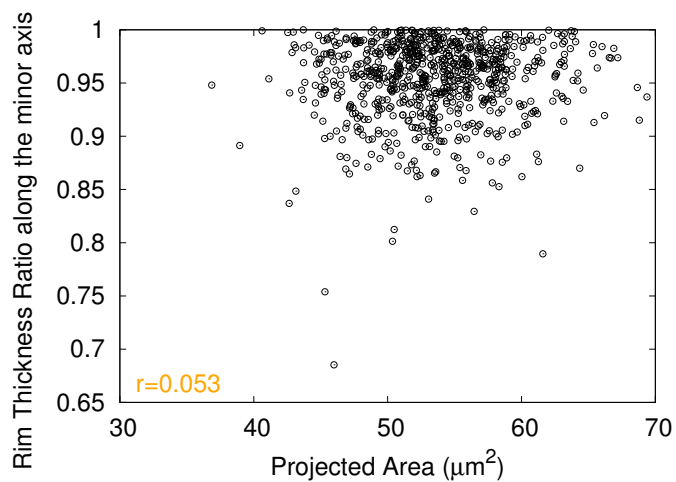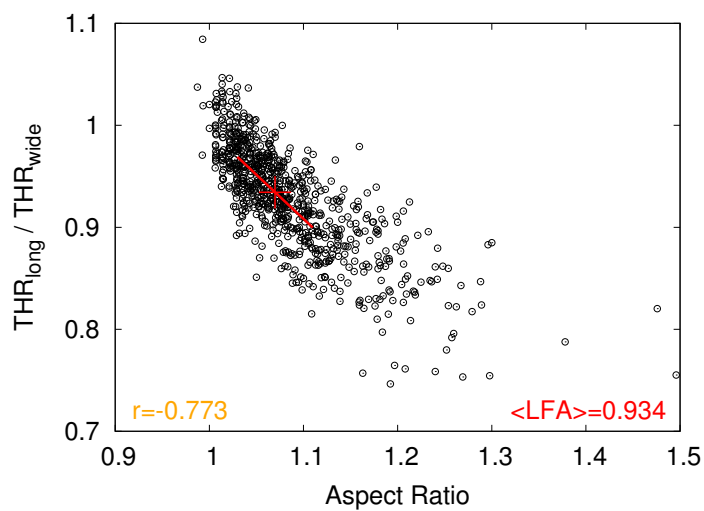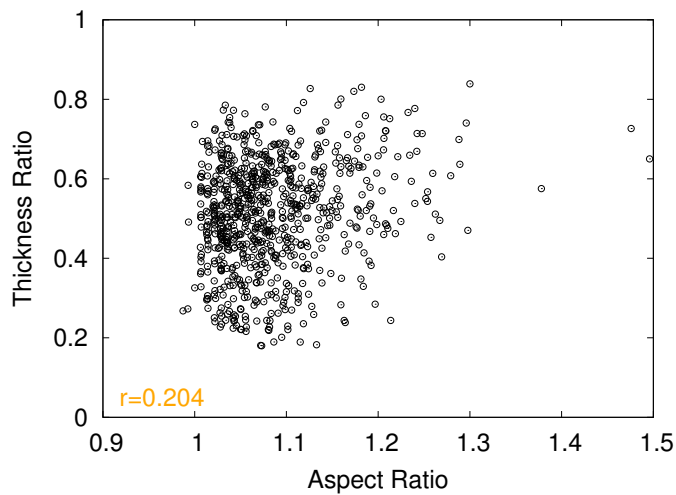

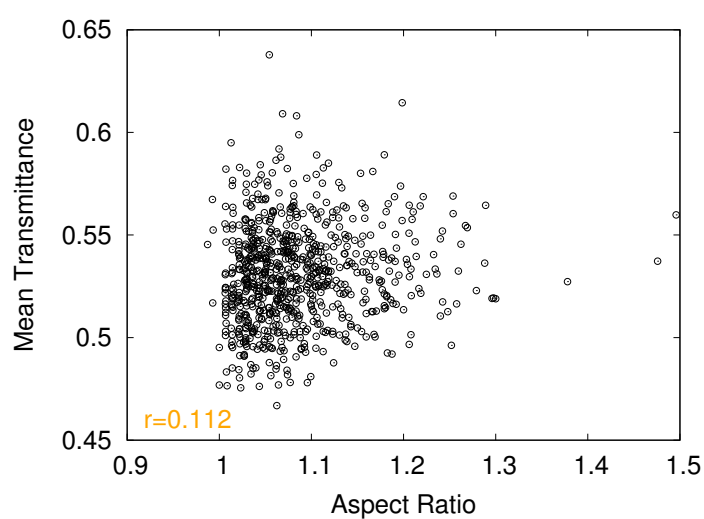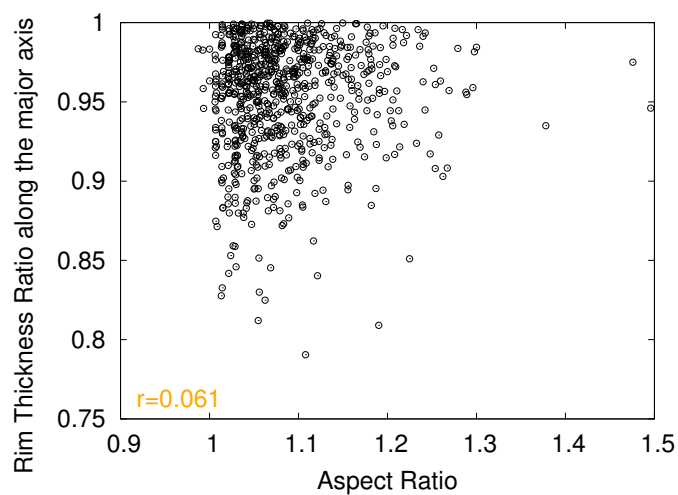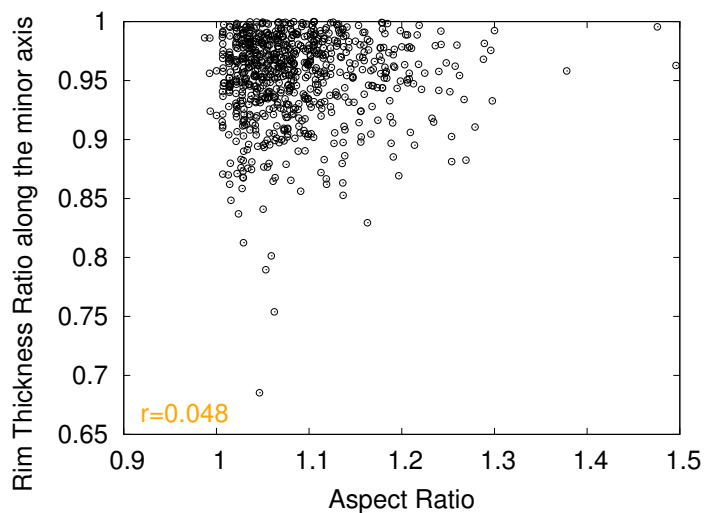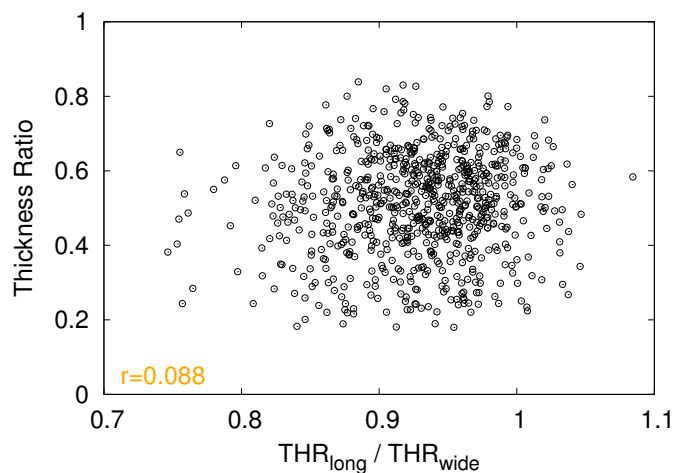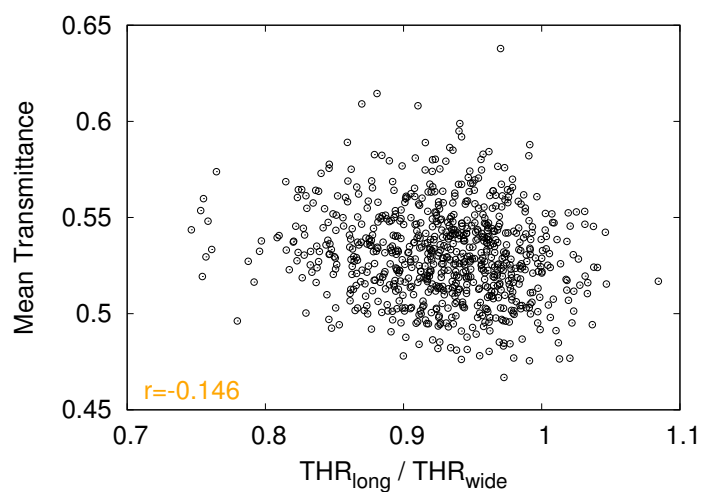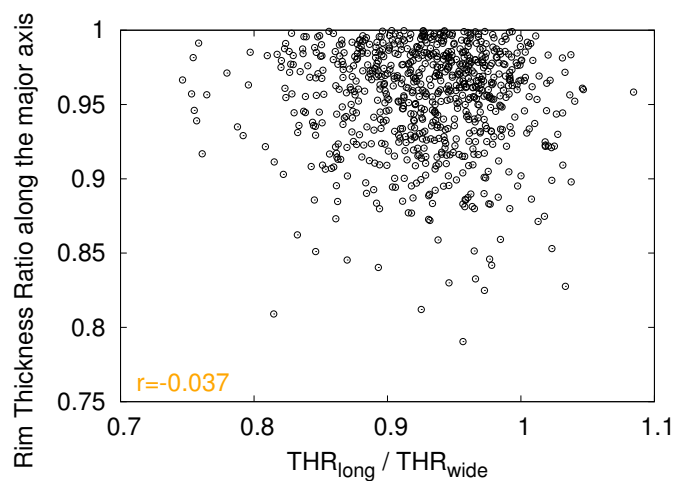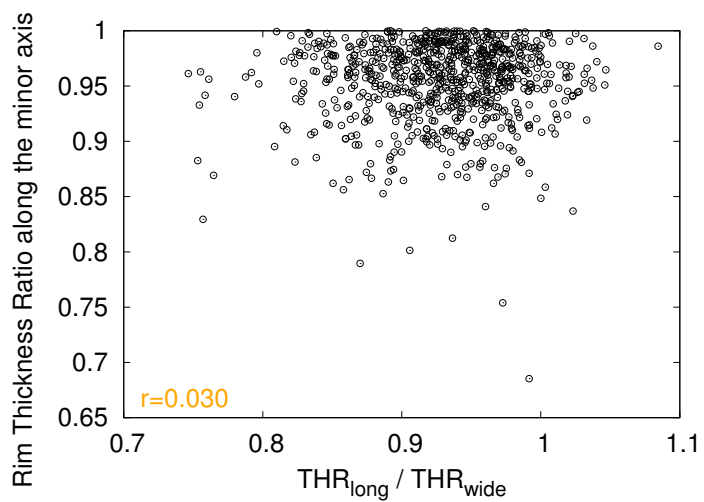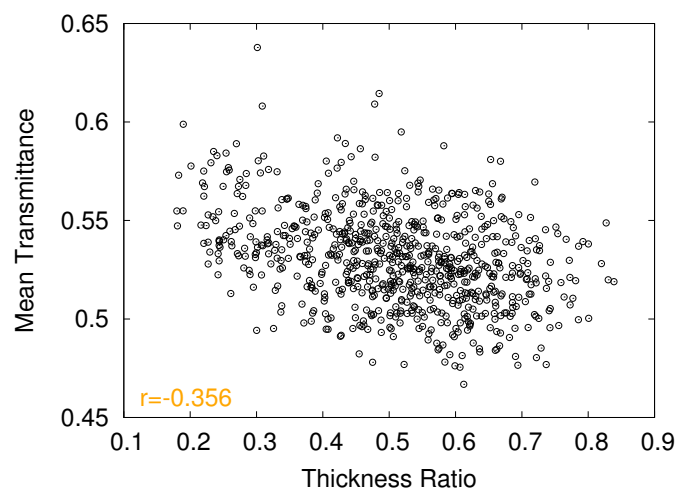

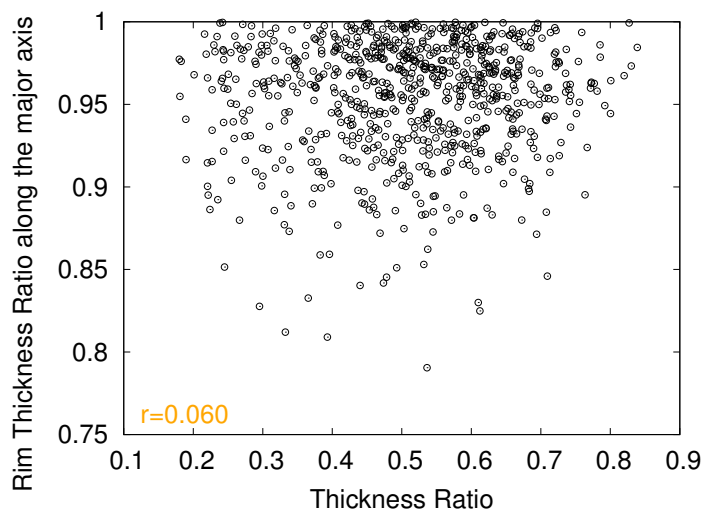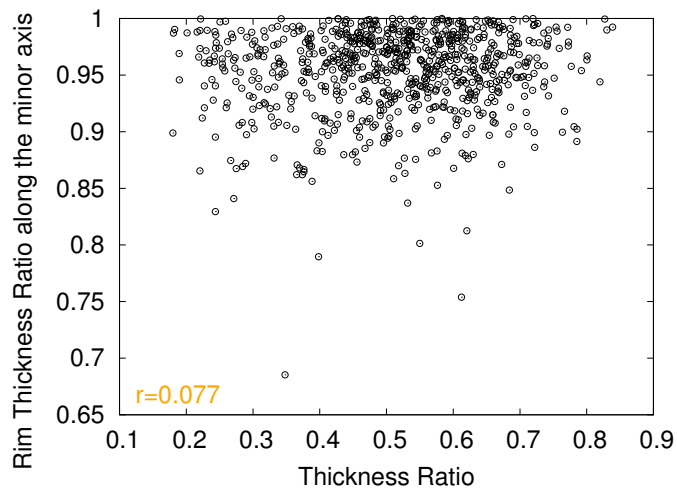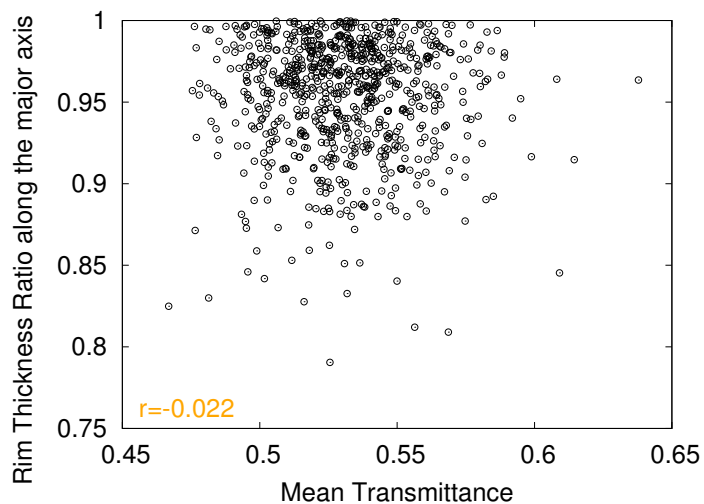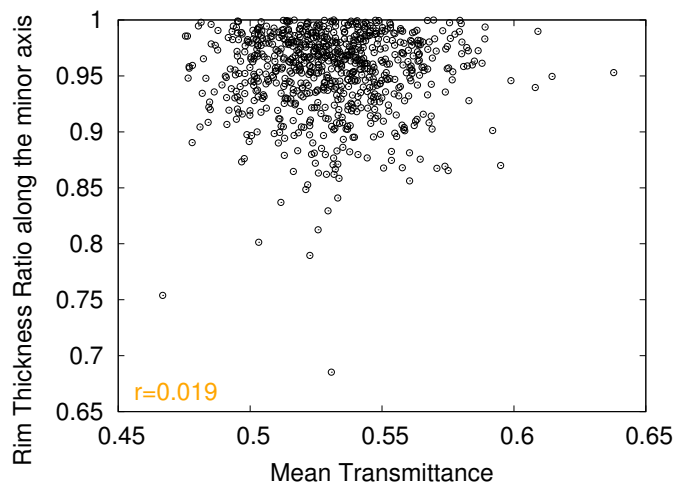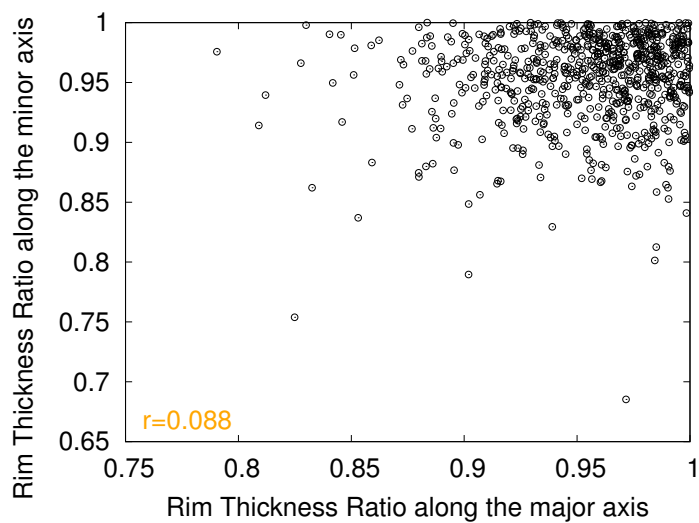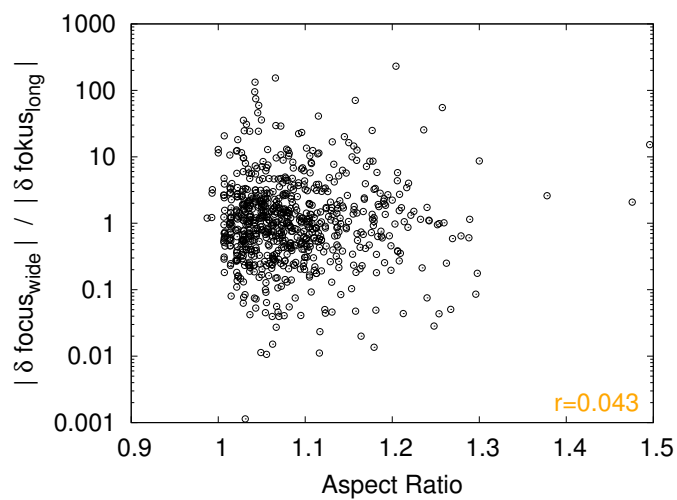

10  $\mu\text{m}$

0588 12130

0847 0.8121

0416 ob

1087 ob

## Donor 8, plasma

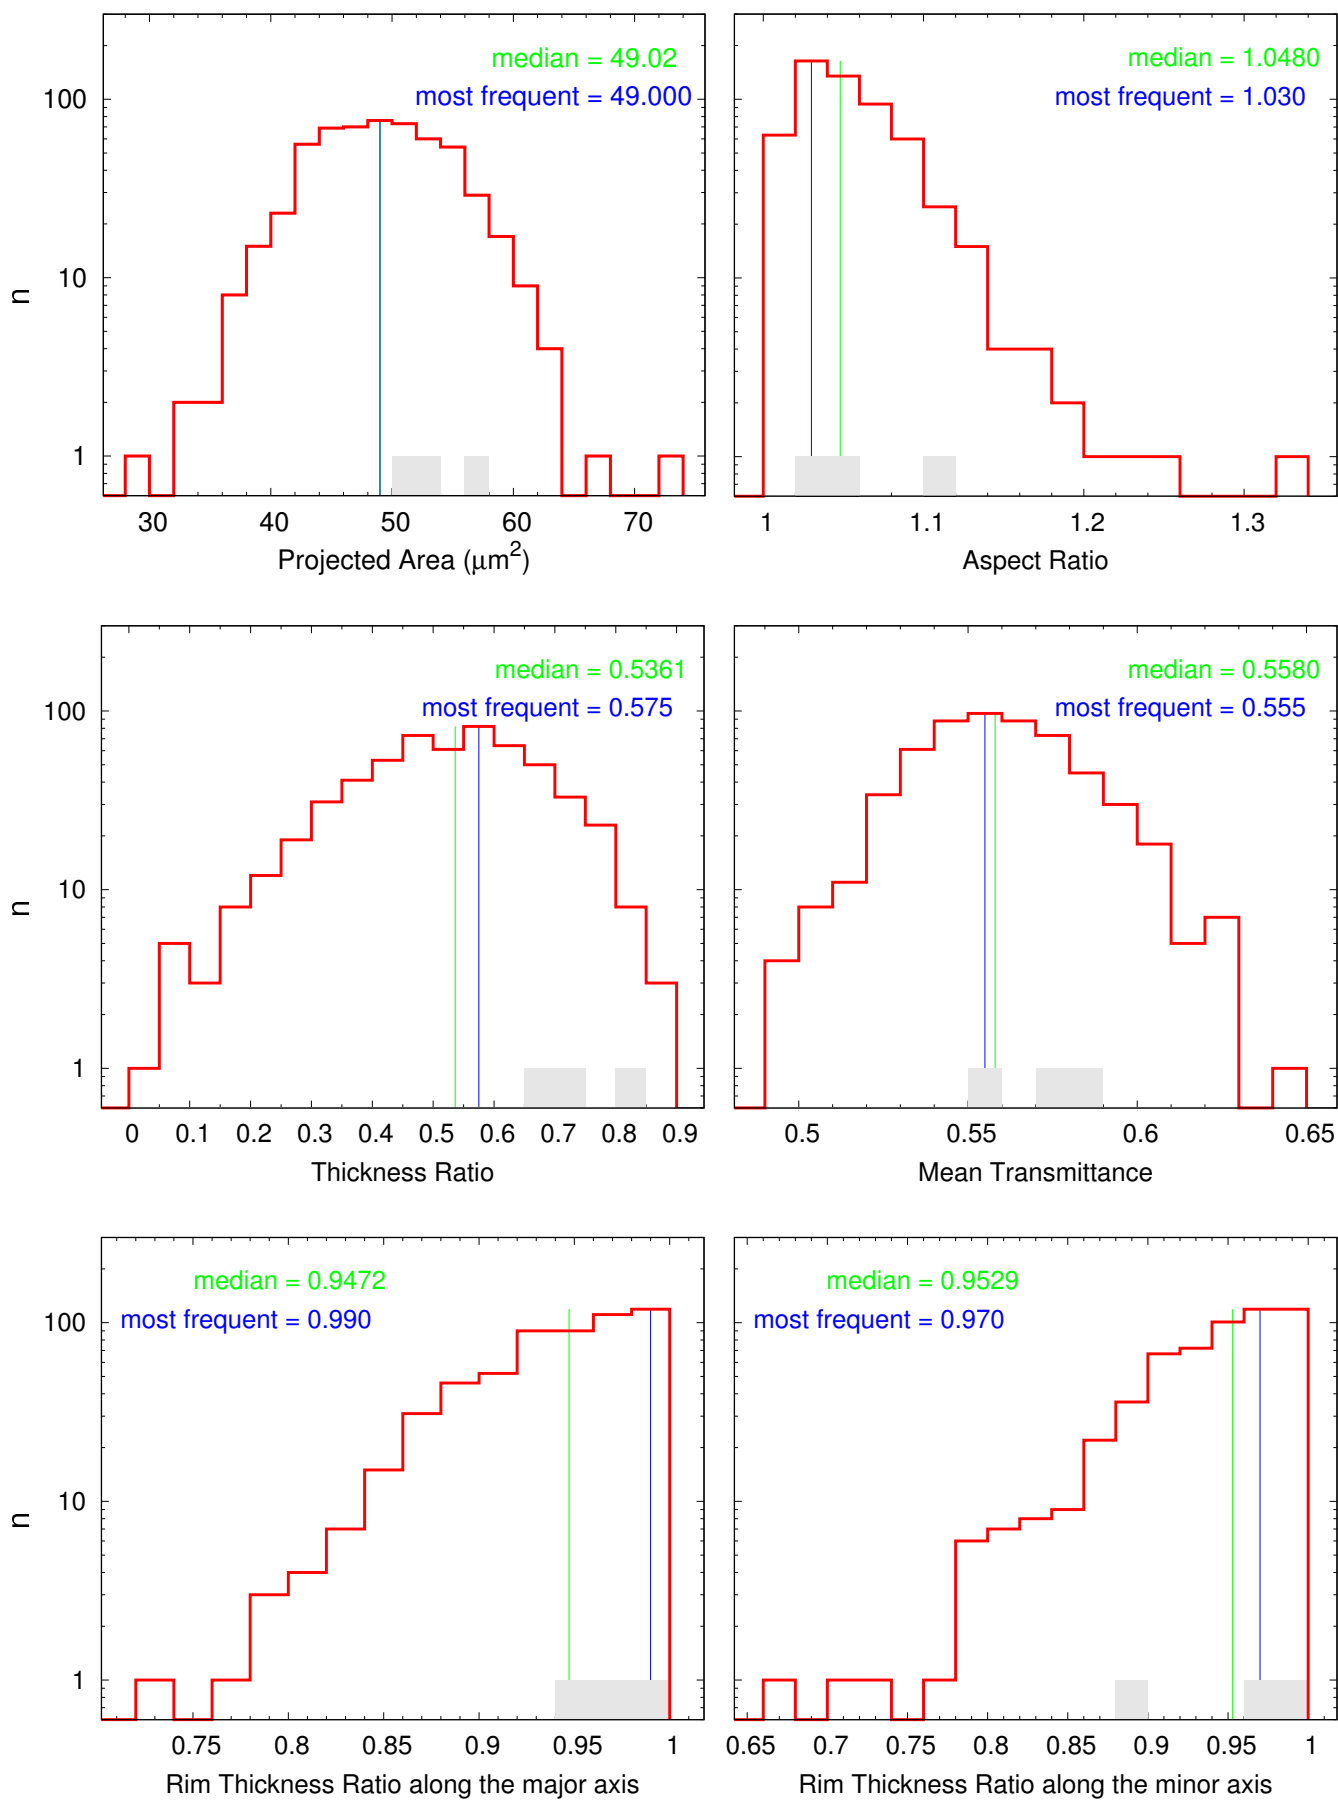



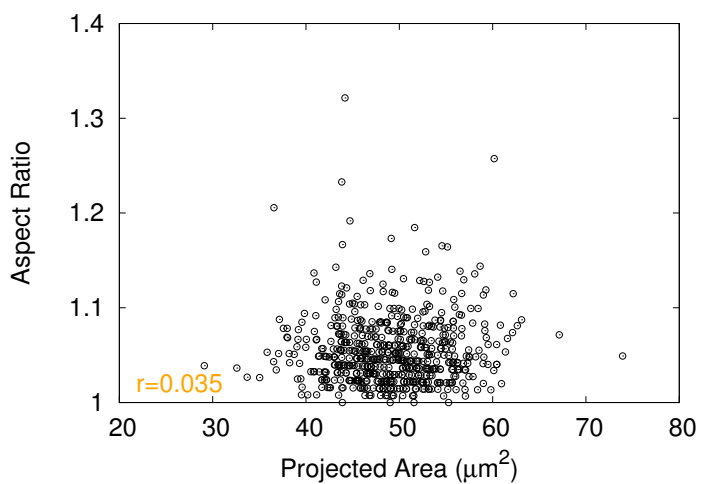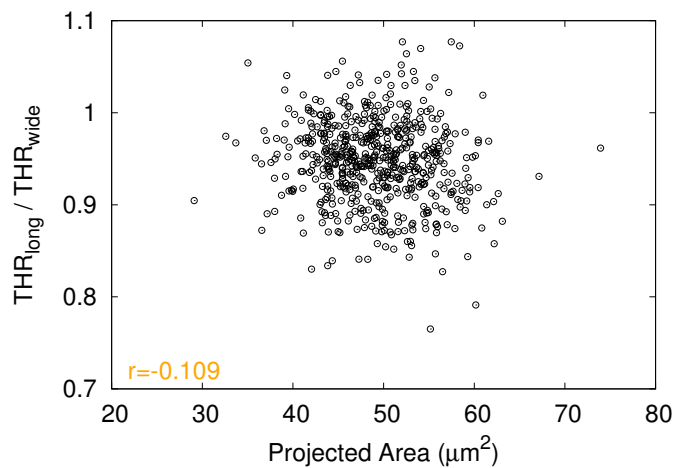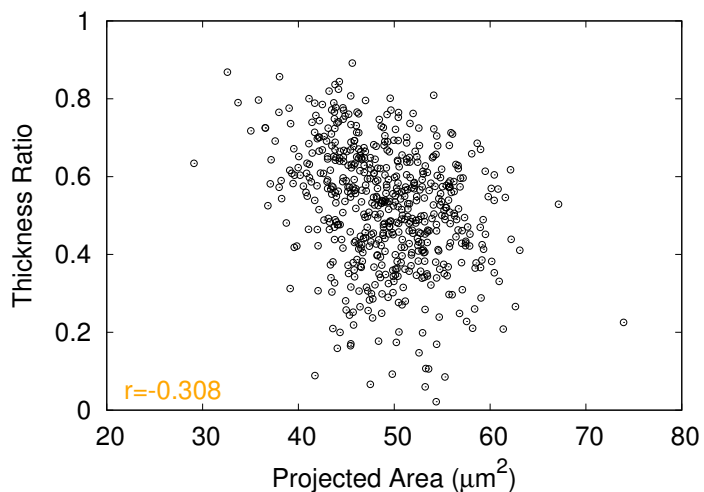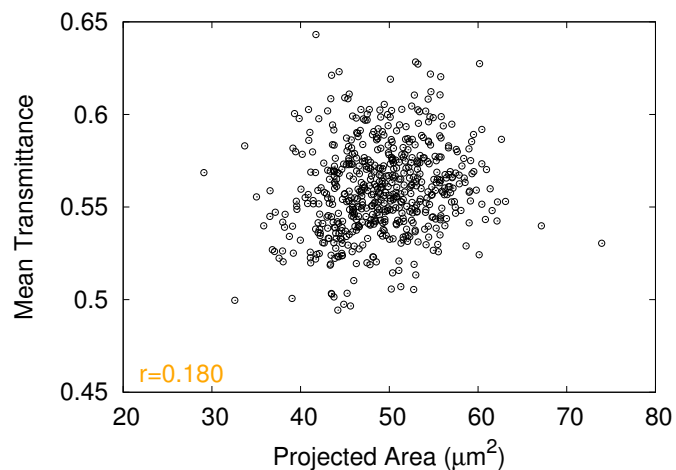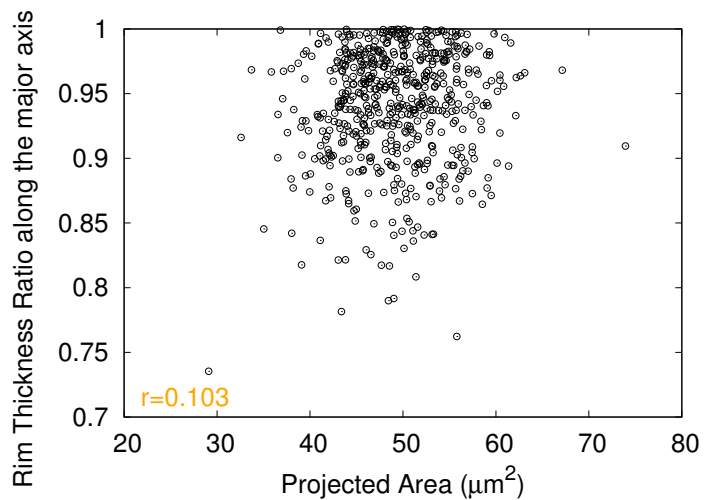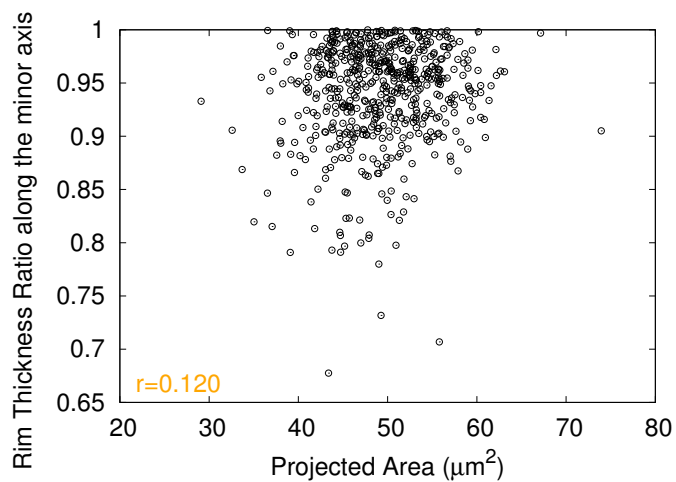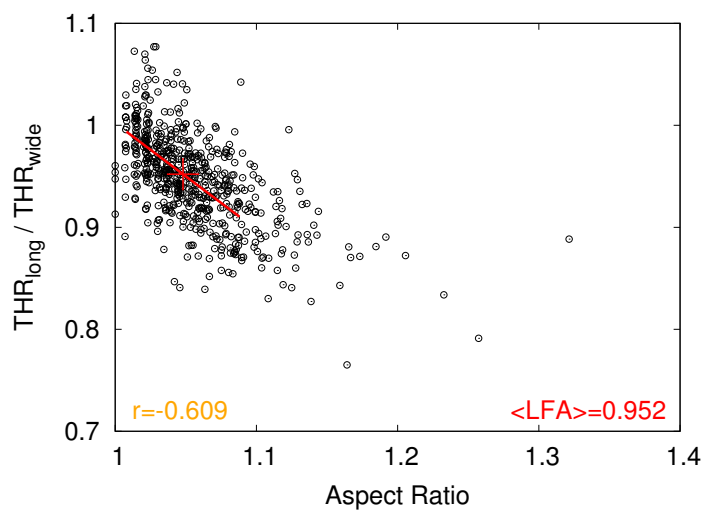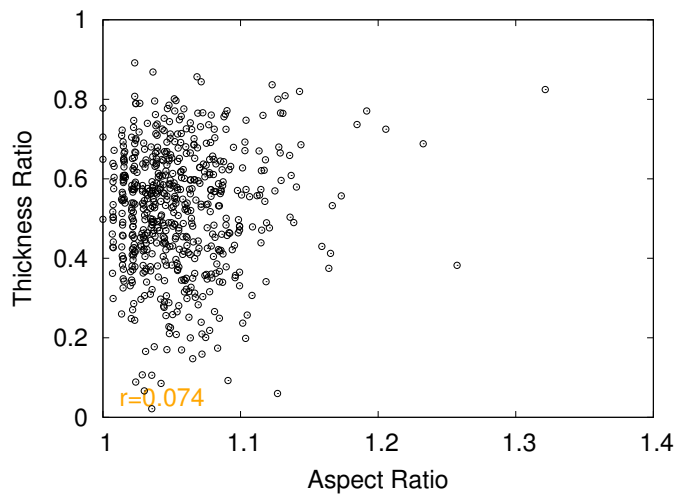

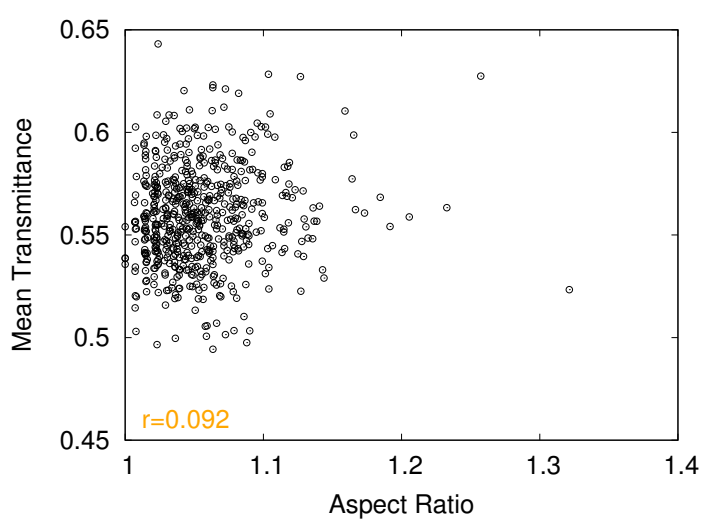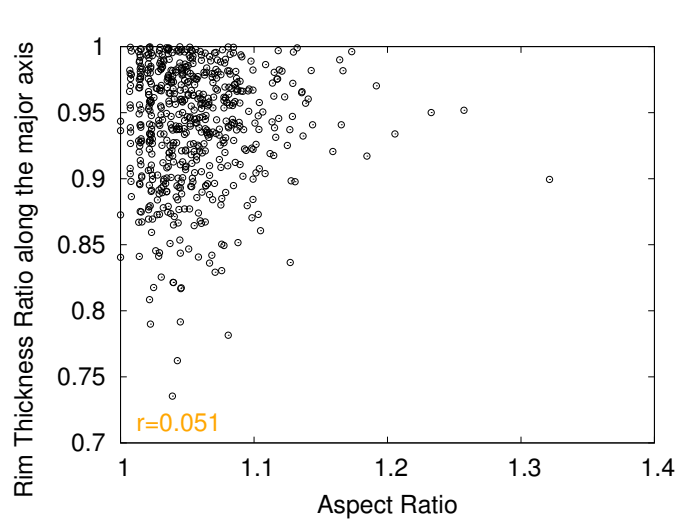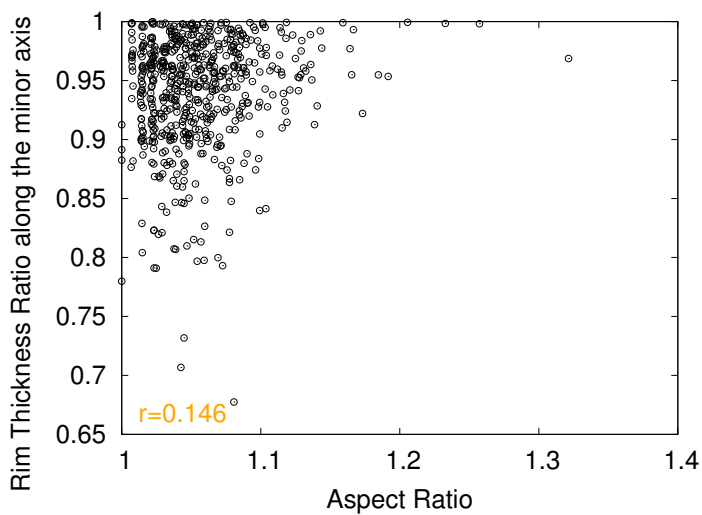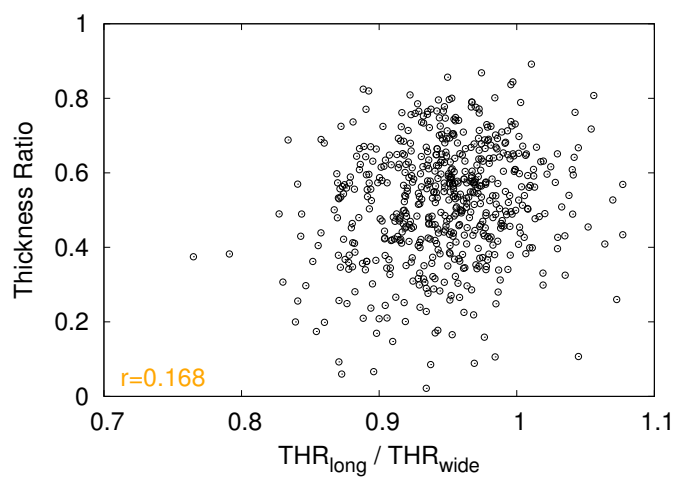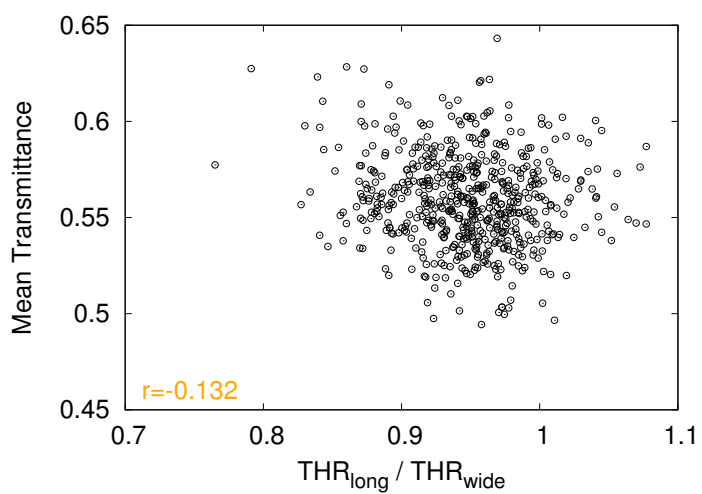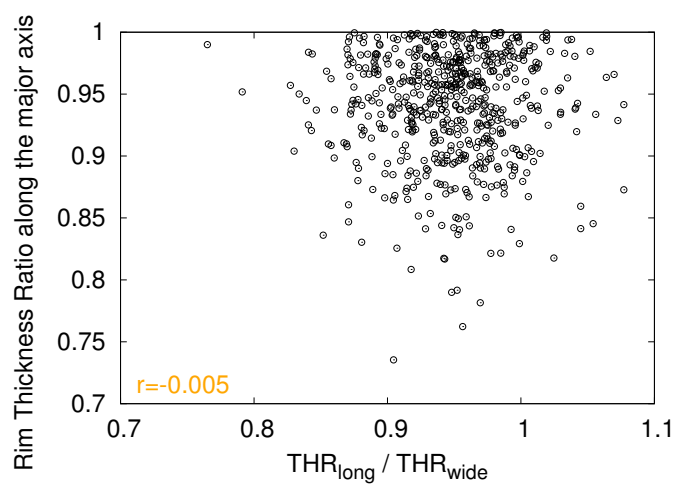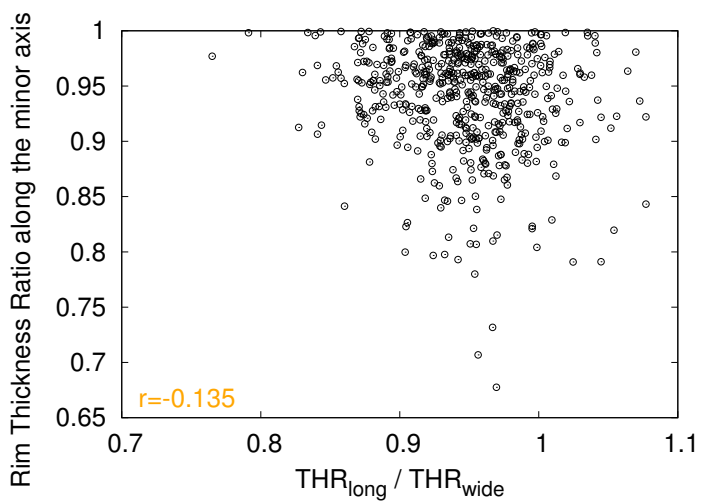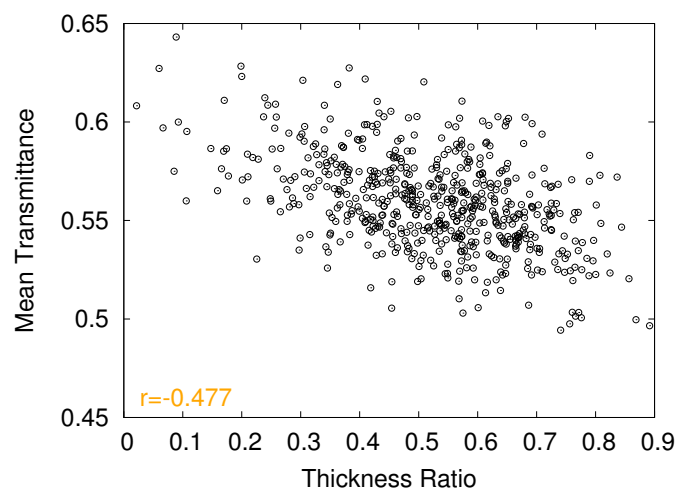

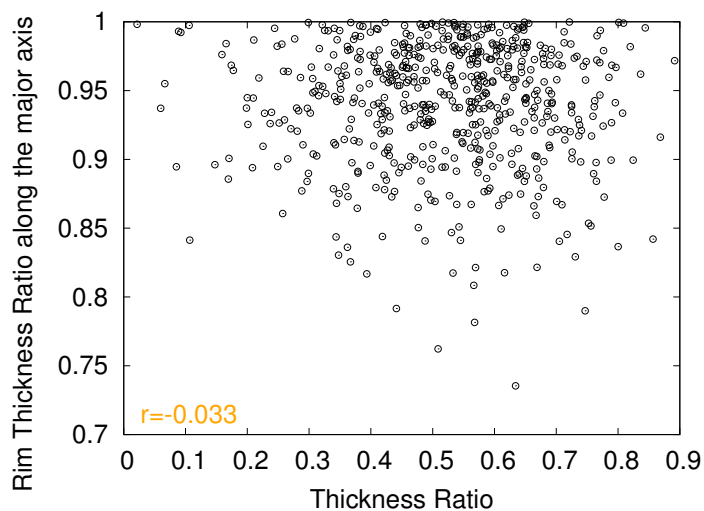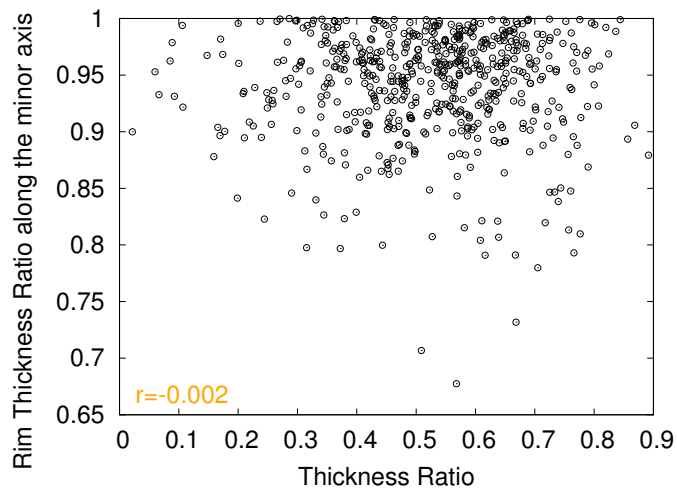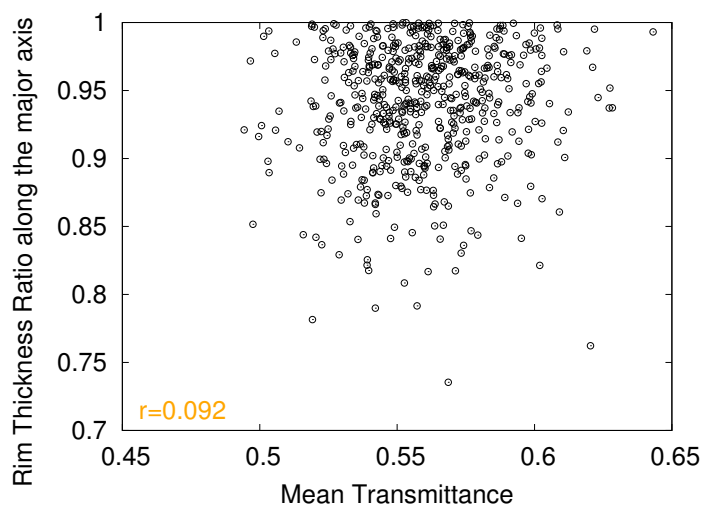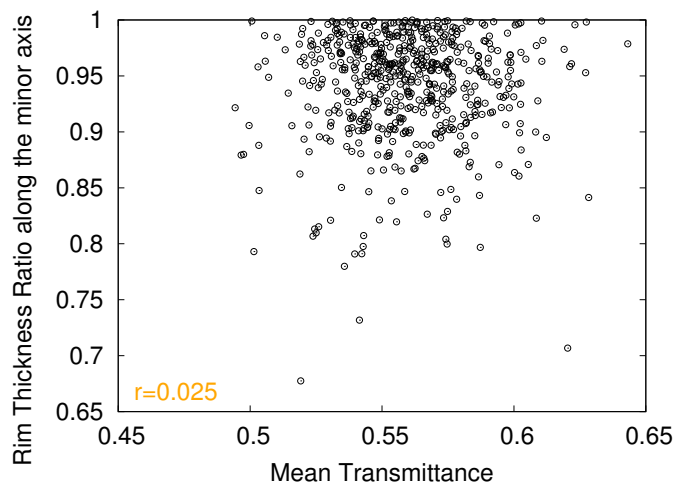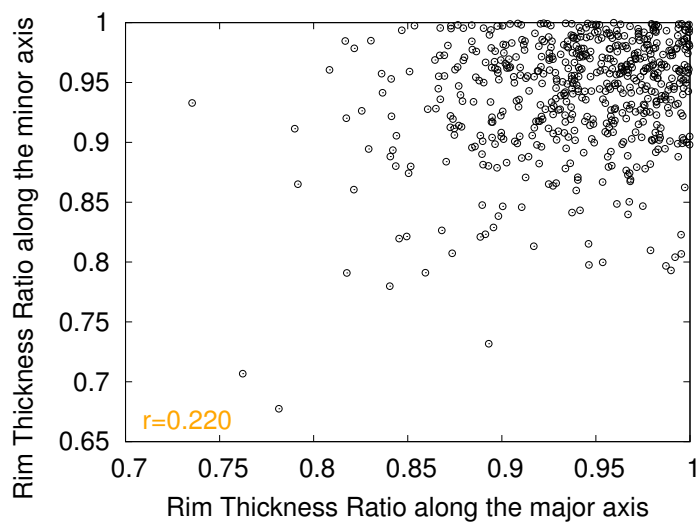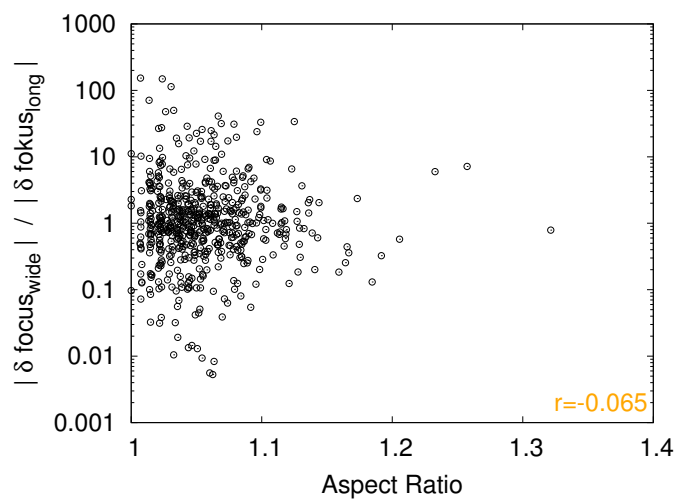

## Donor 8, serum washed

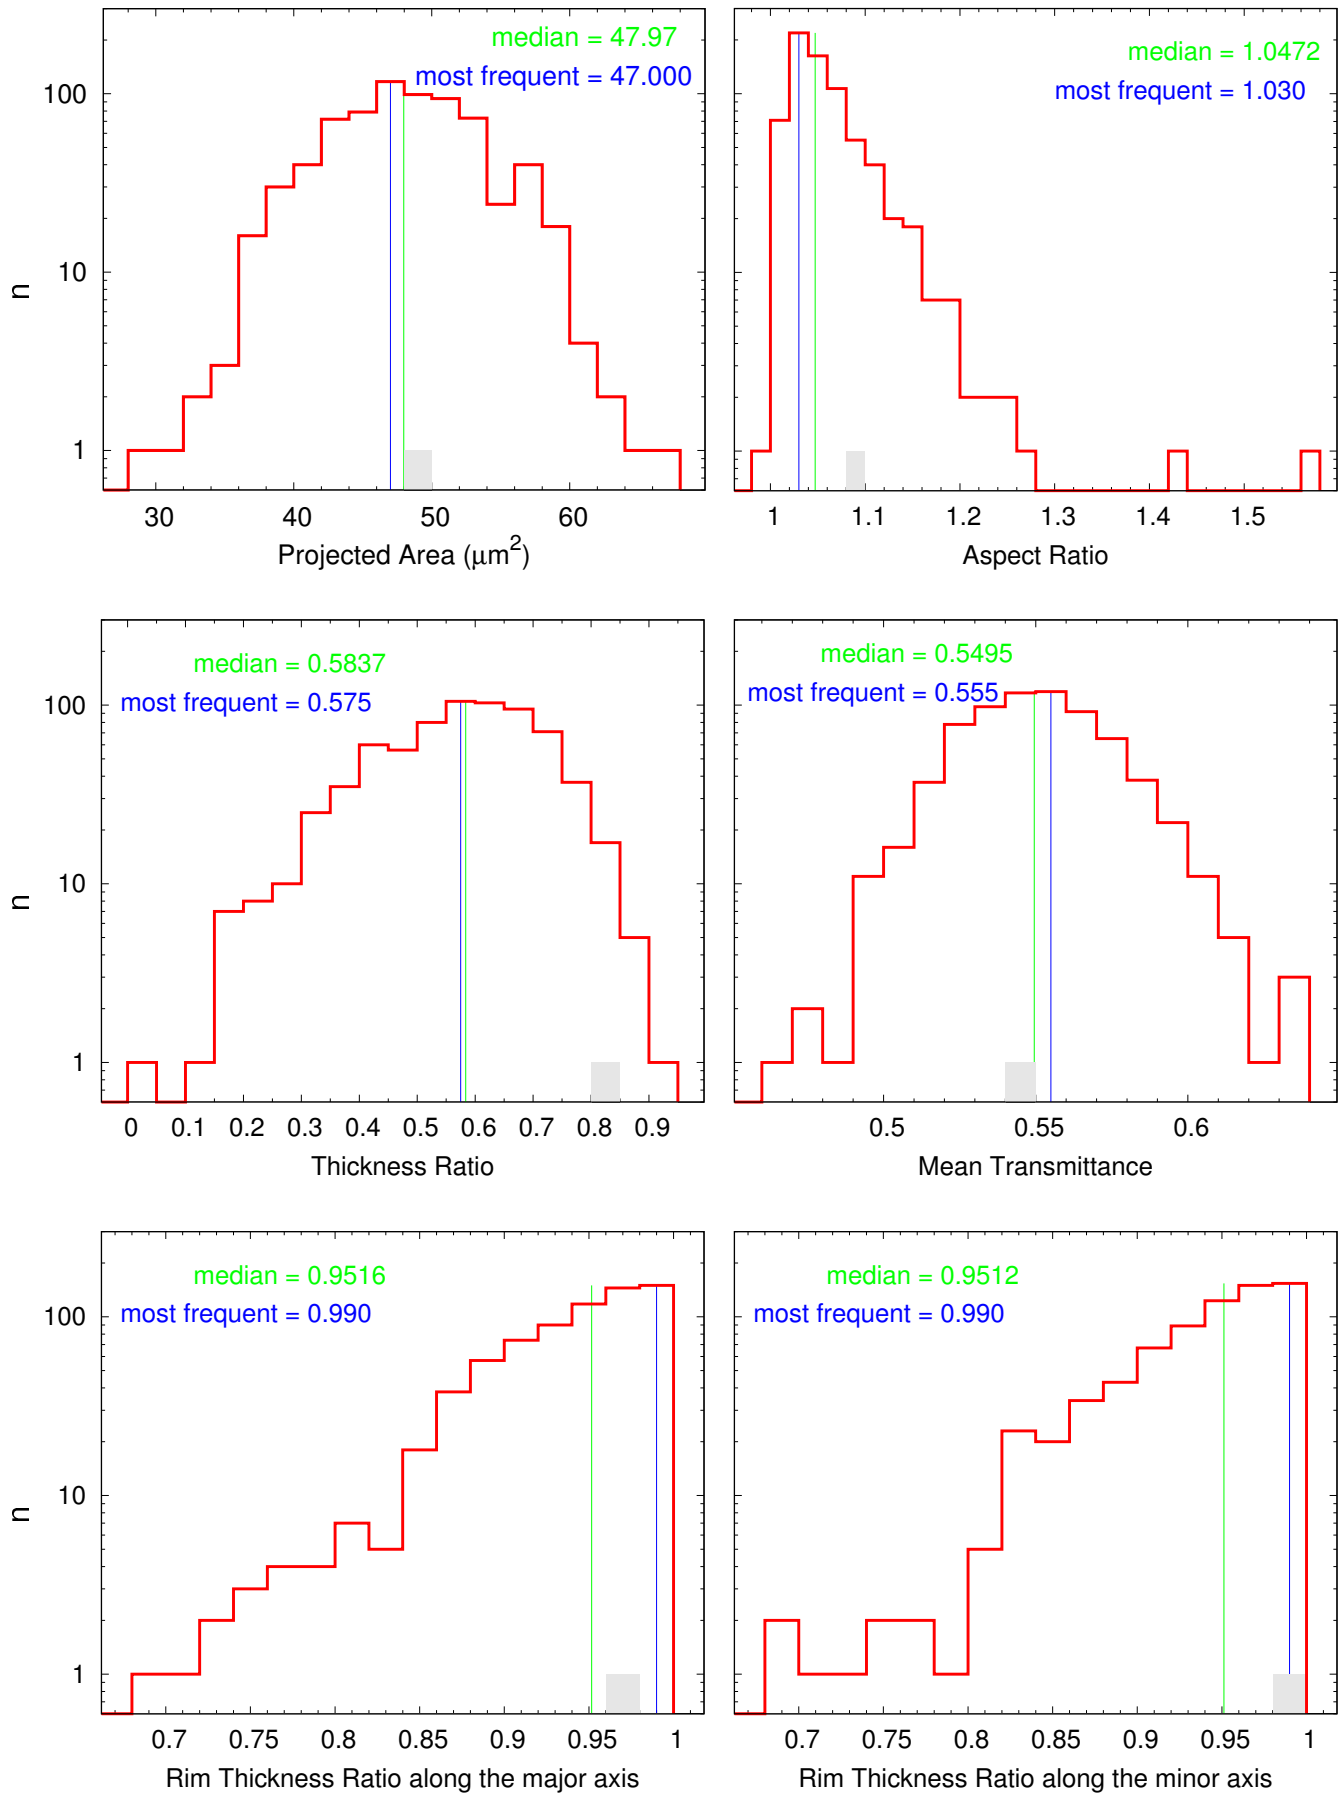

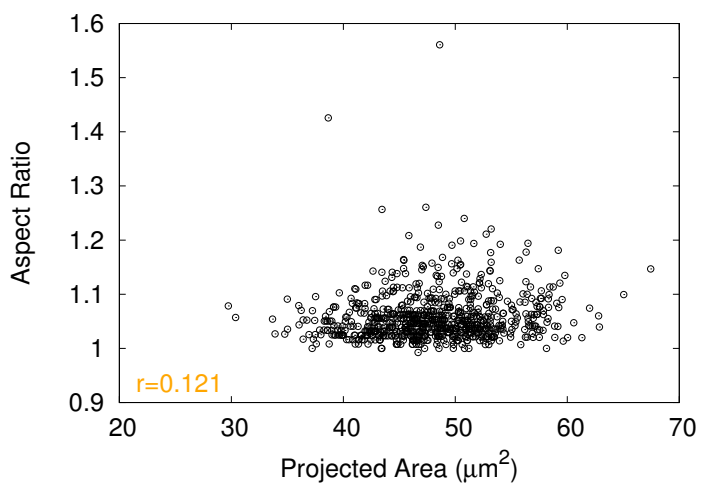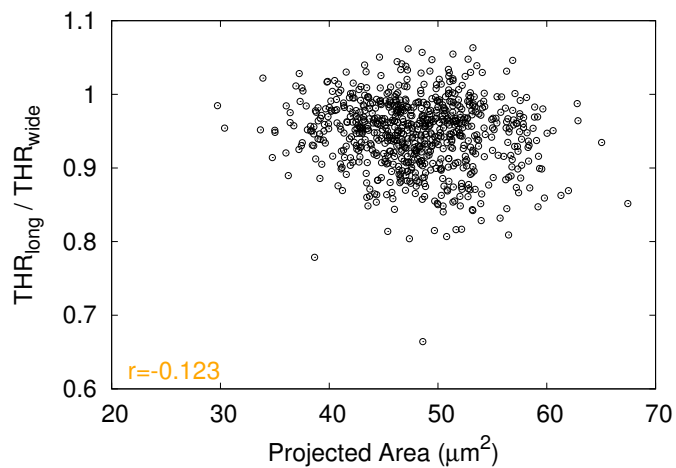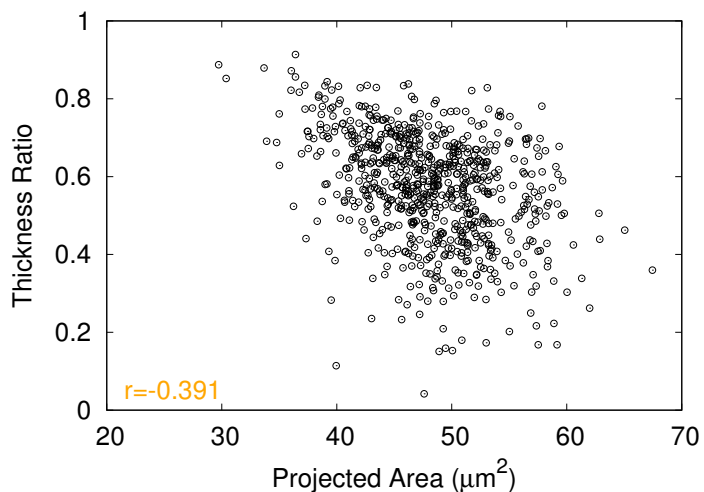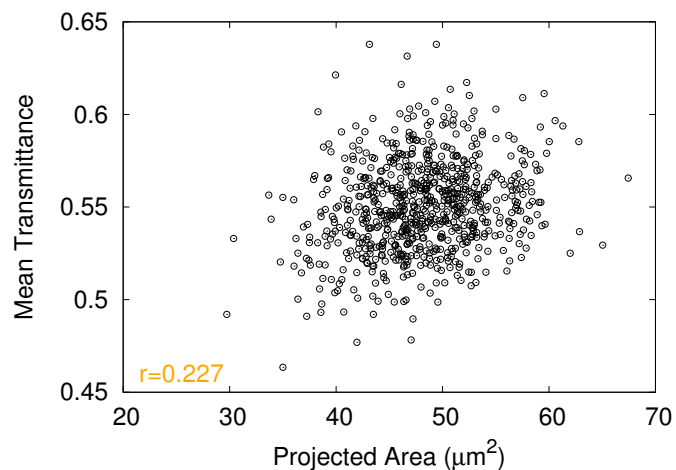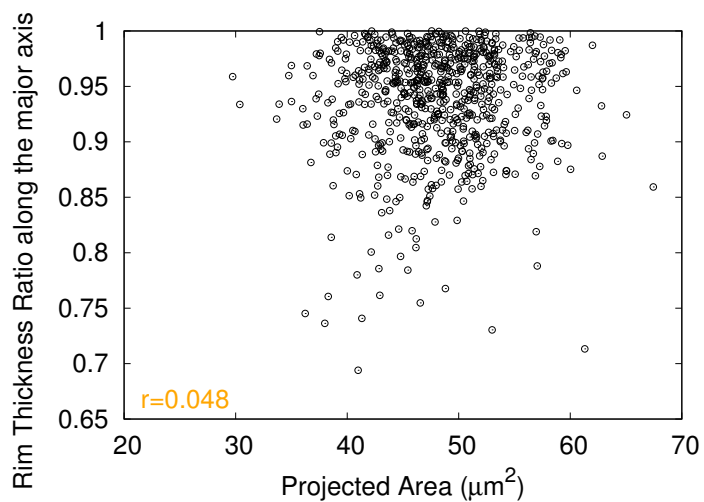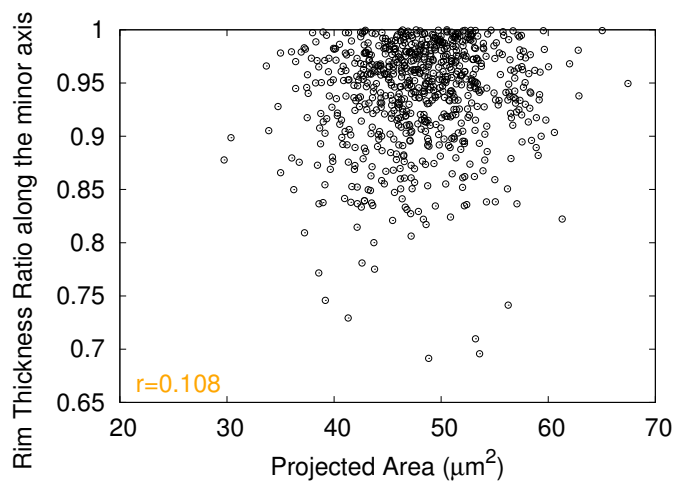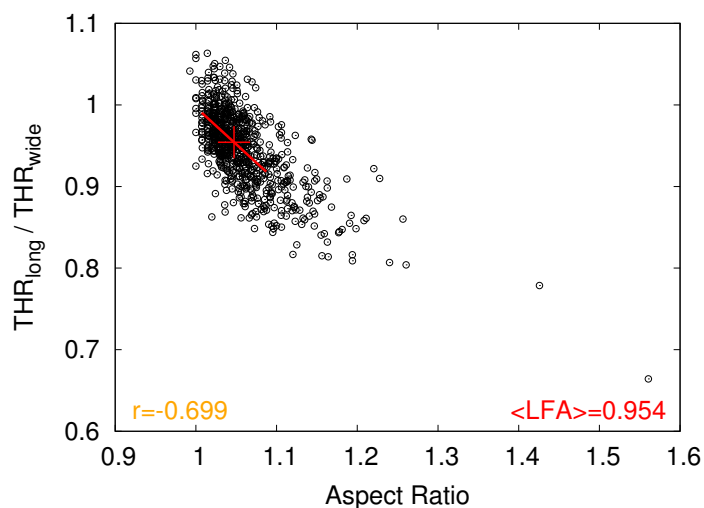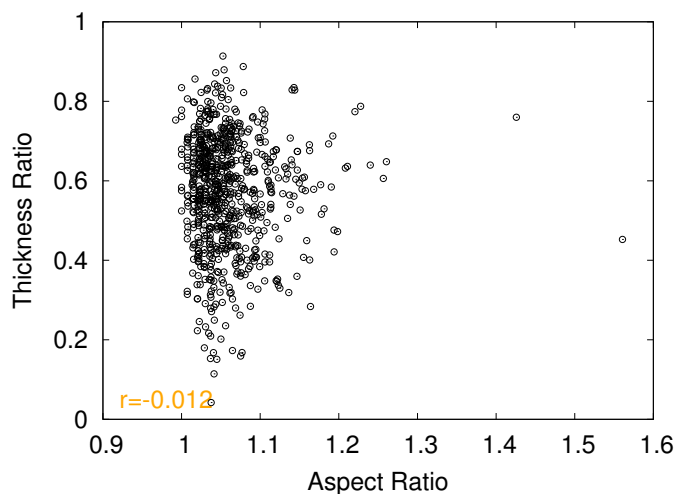

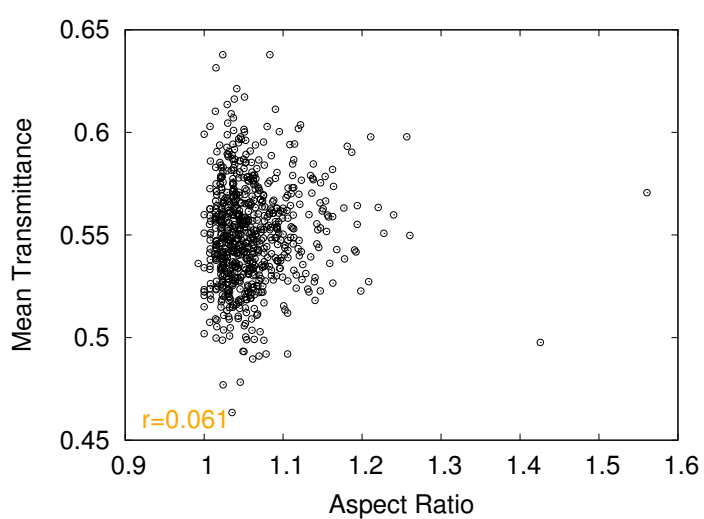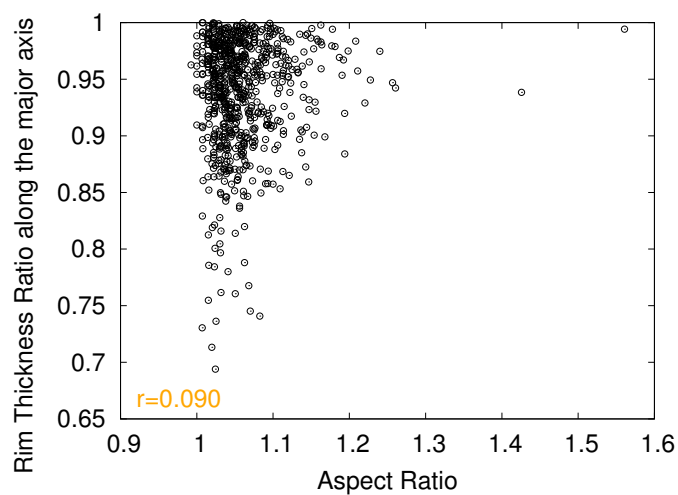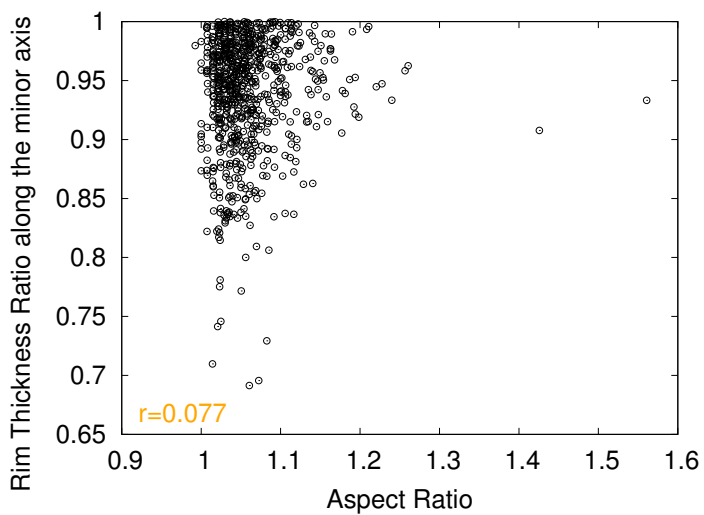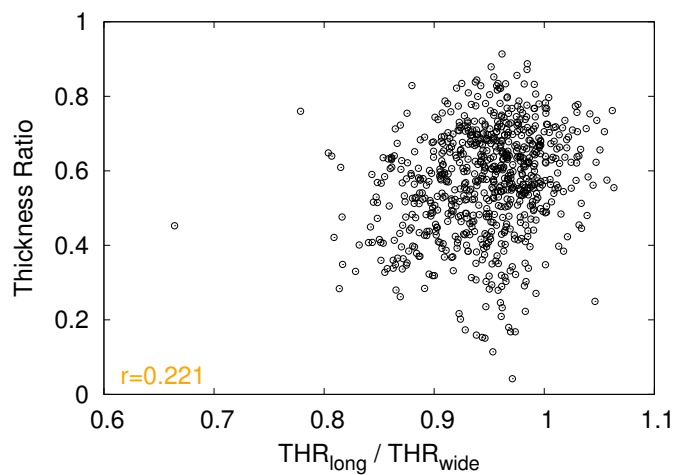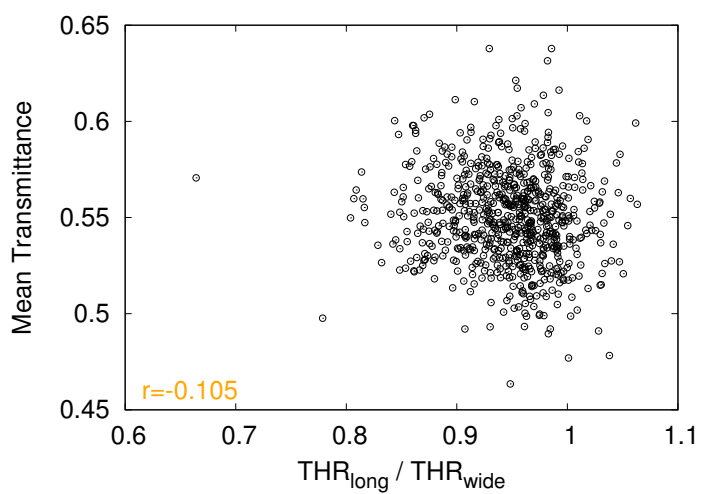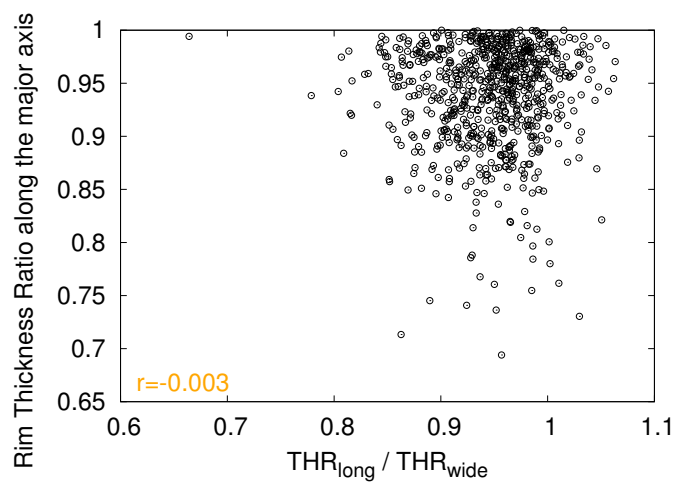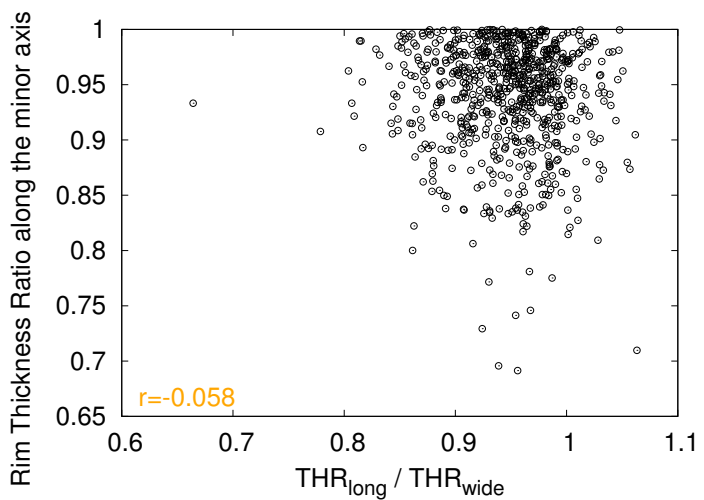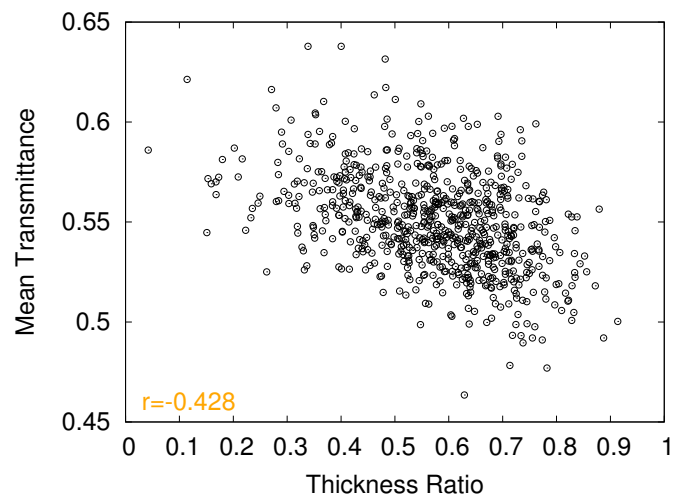



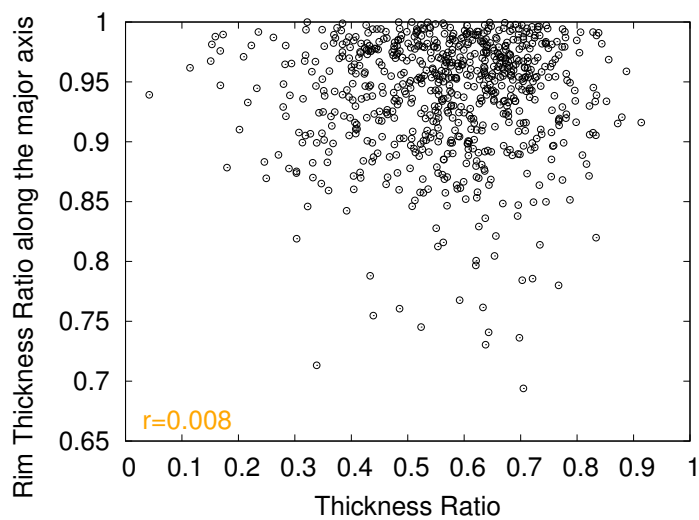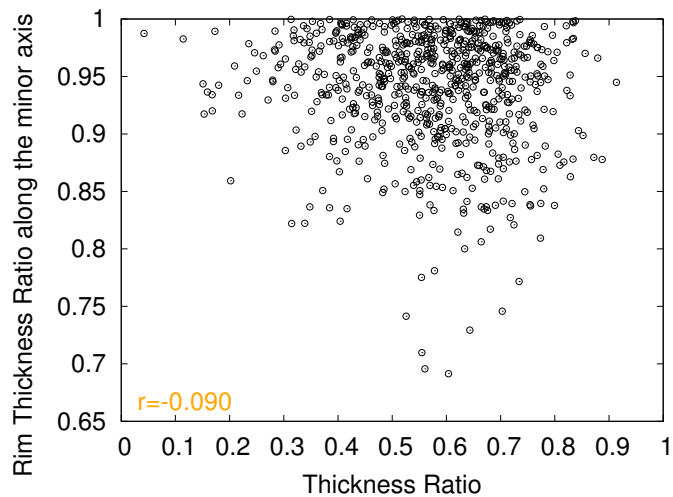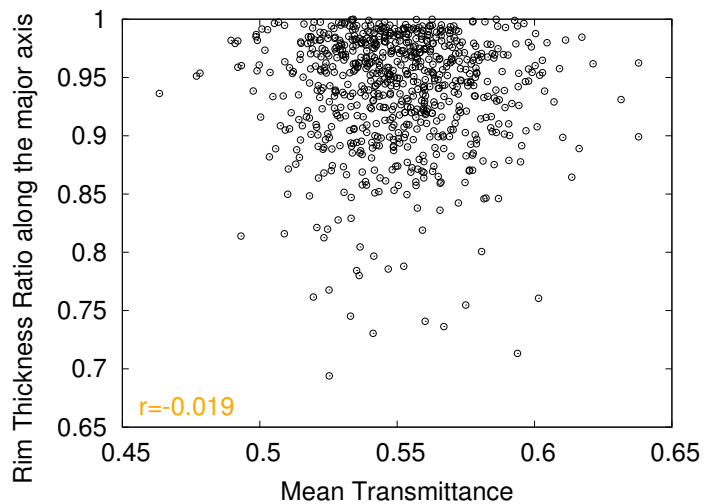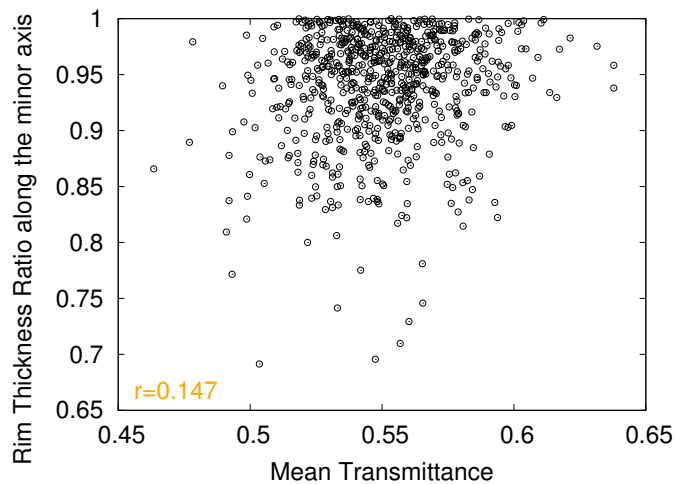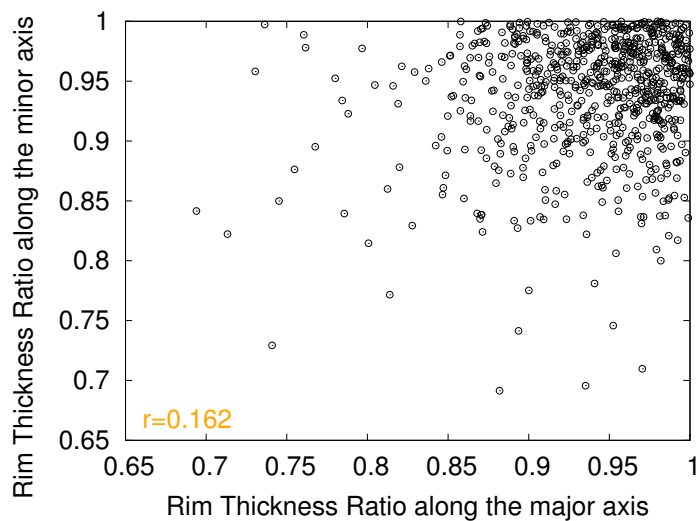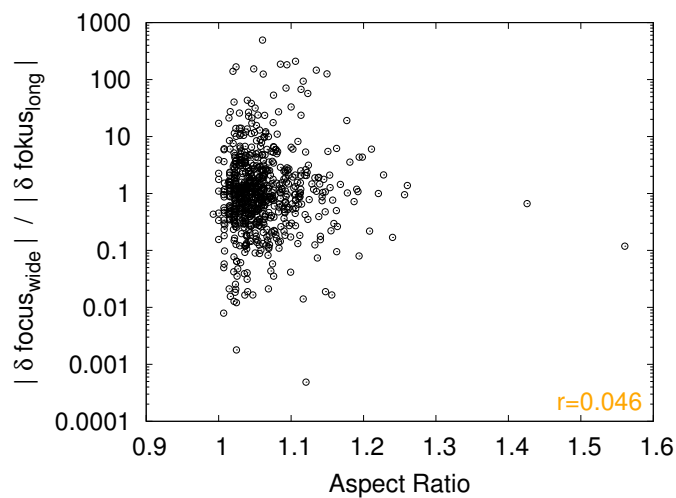

10  $\mu\text{m}$

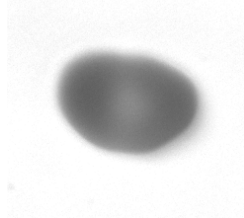

0895 ob
