# Supplementary figures and images for: The Shape of Human Red Blood Cells Suspended in Autologous Plasma and Serum
Source: MDPI journal article supplement (doi:10.3390/cells11121941), 2022-06-16

donor

plasma

serum, unwashed

1

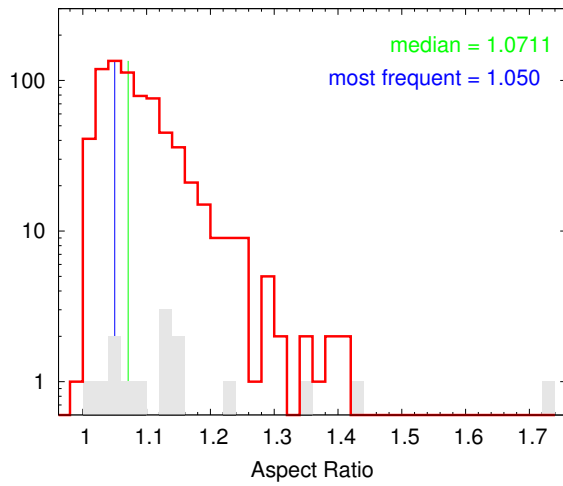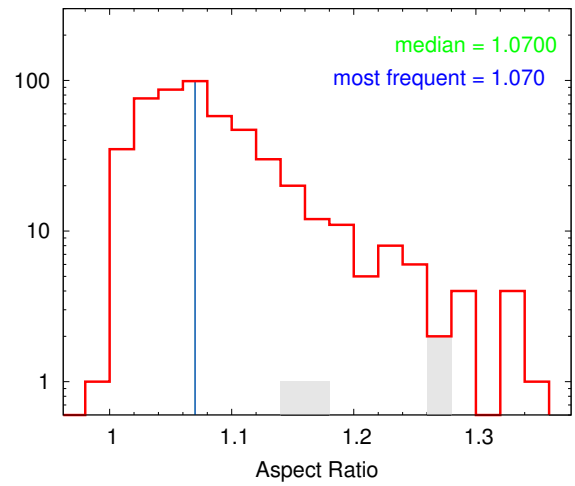

2

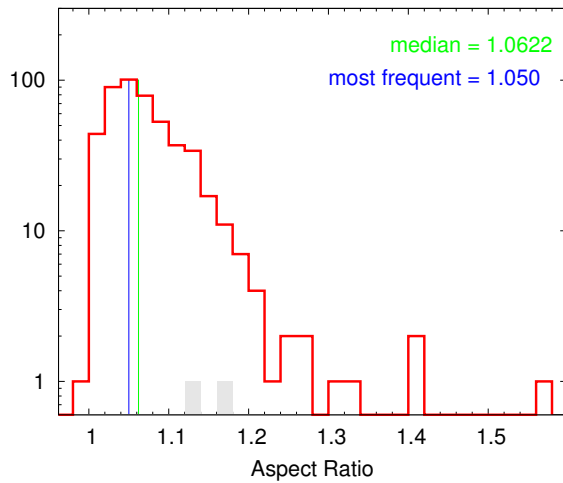

3

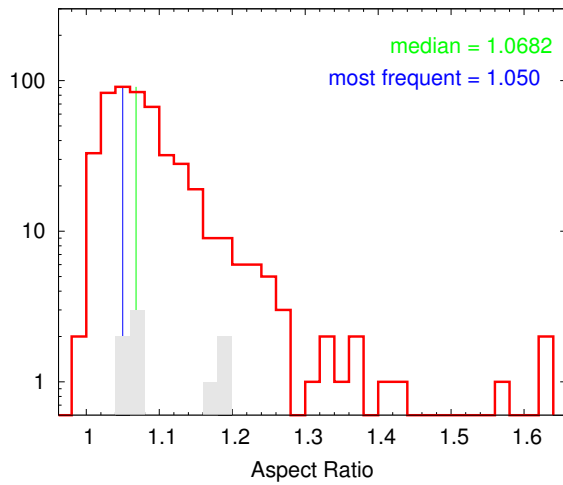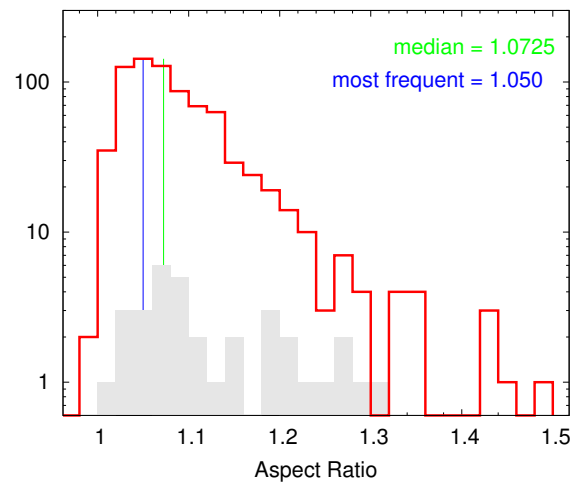

donor

plasma

serum, washed

3

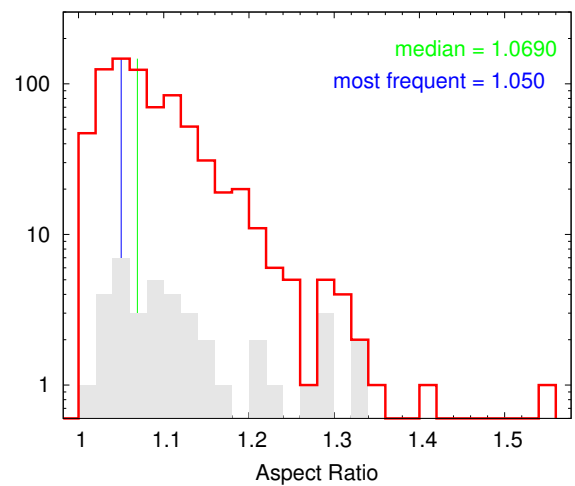

4

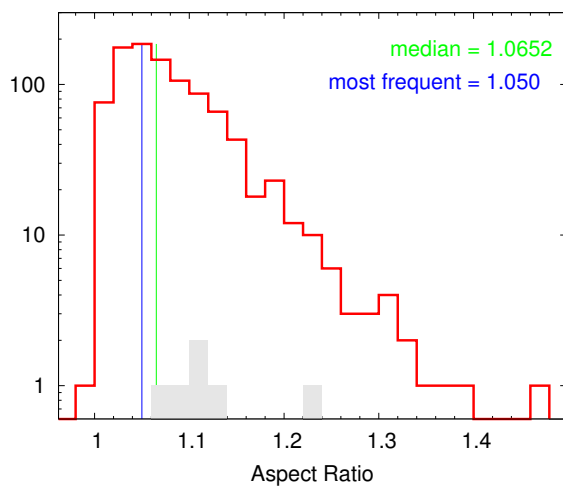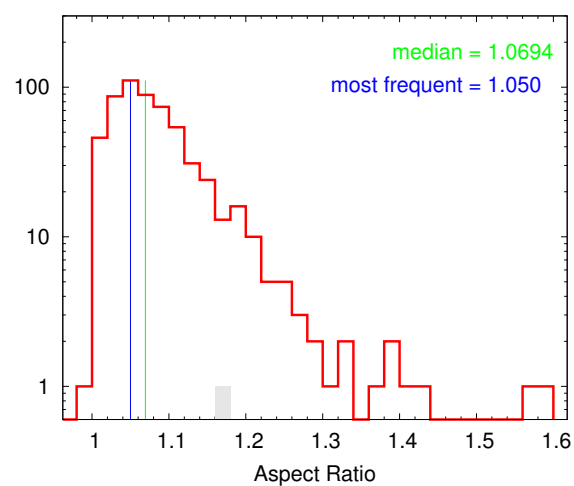

5

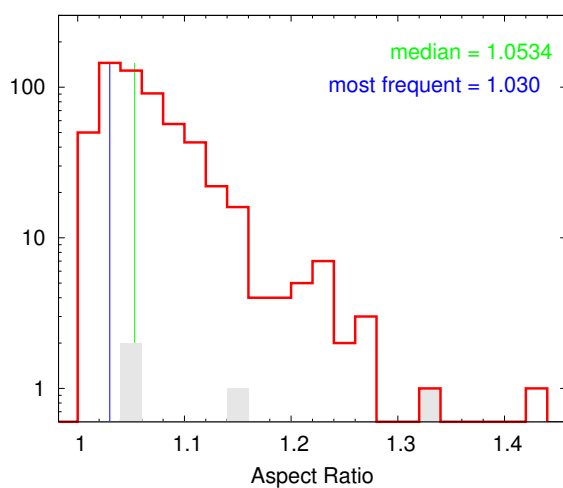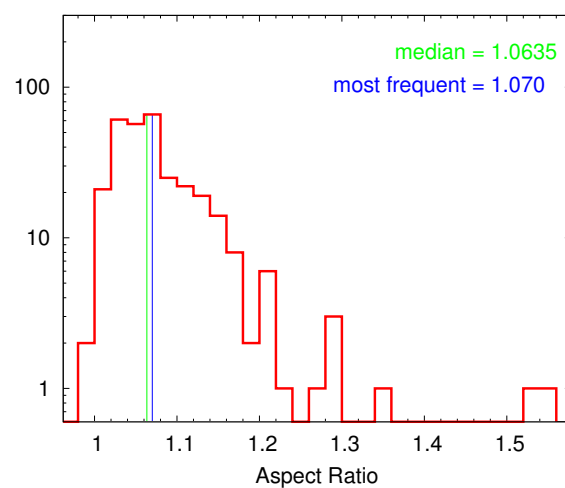

6

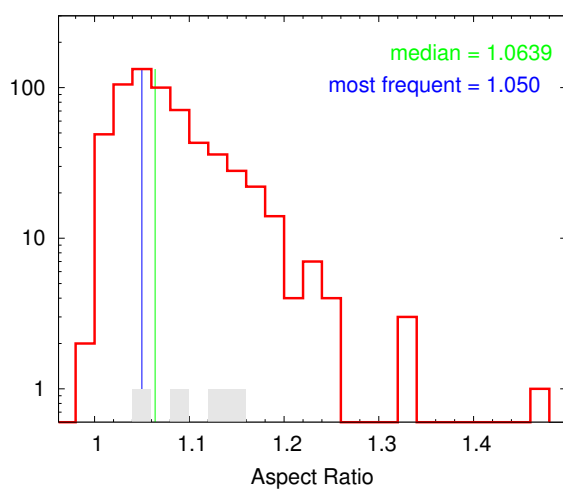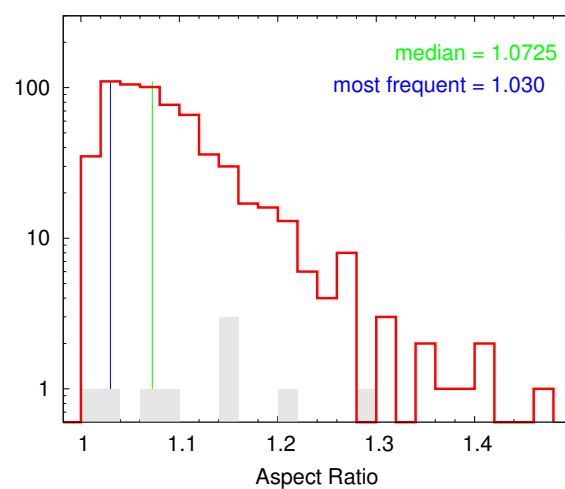

7

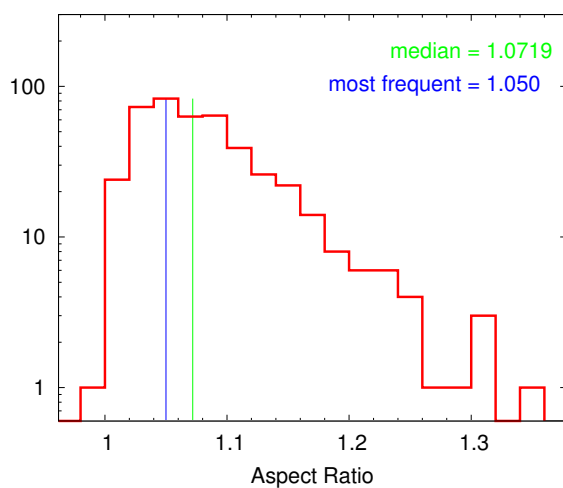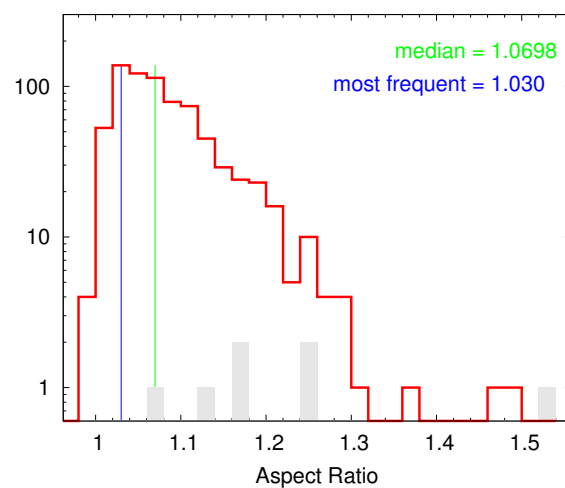

8

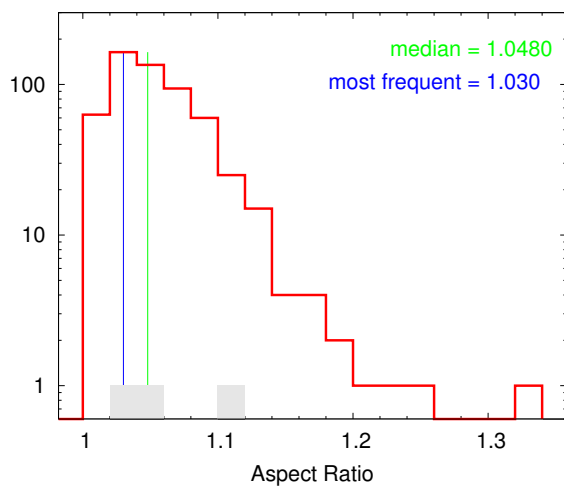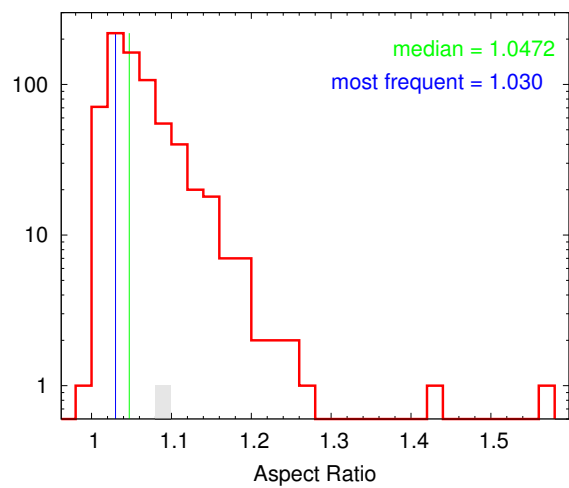

Supplement: s1 [file s1]

donor

plasma

serum, unwashed

1

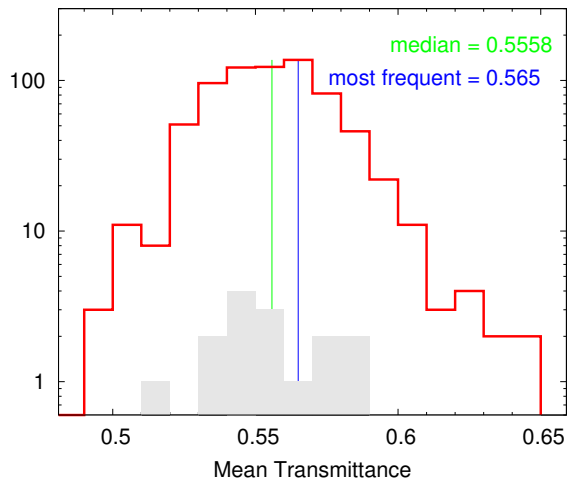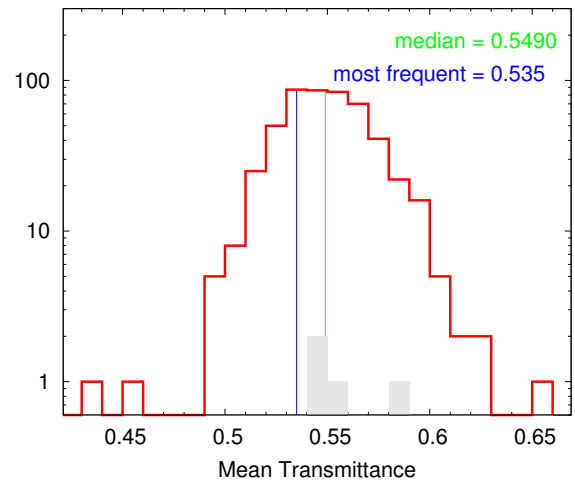

2

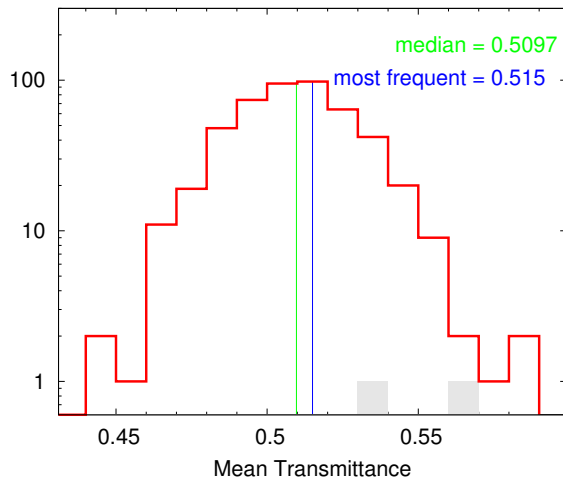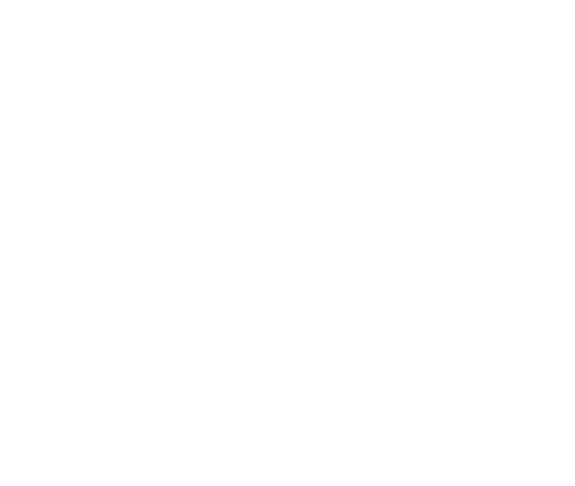

3

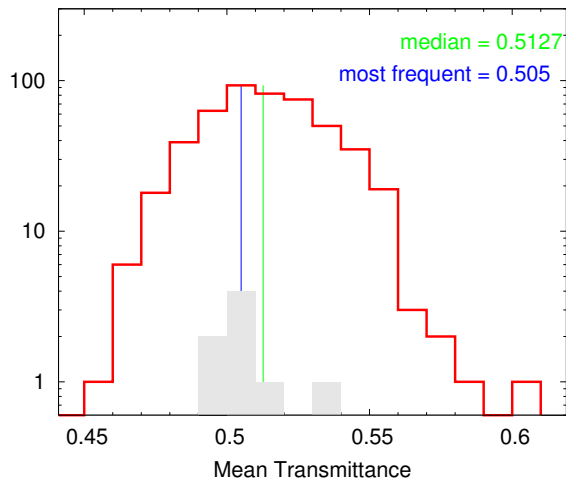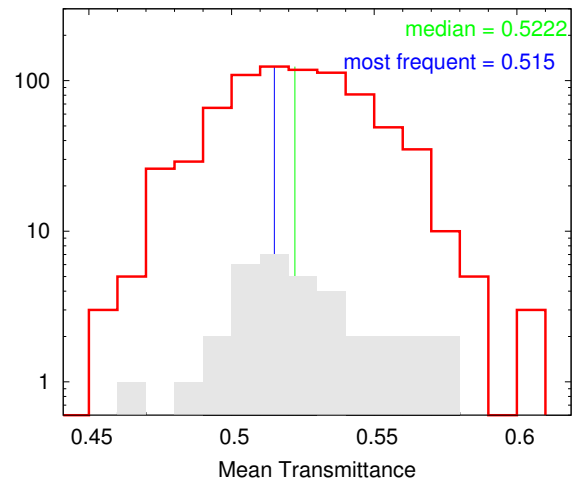

donor

plasma

serum, washed

3

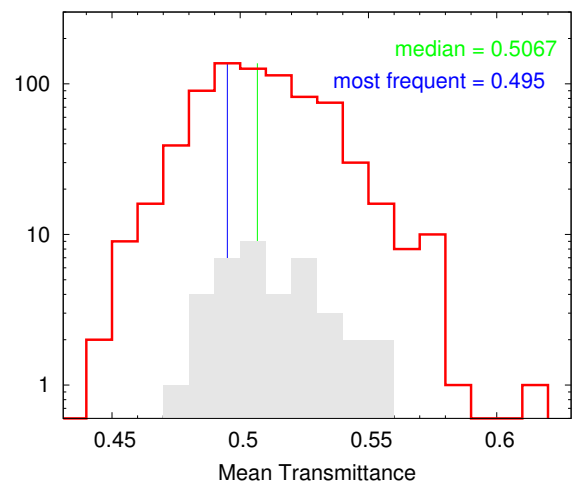

donor

plasma

serum, washed

4

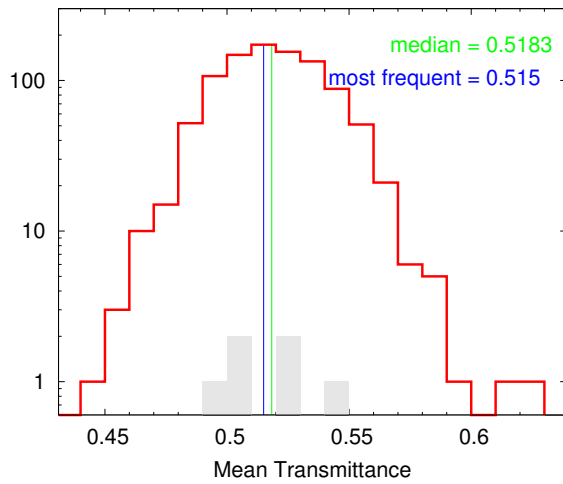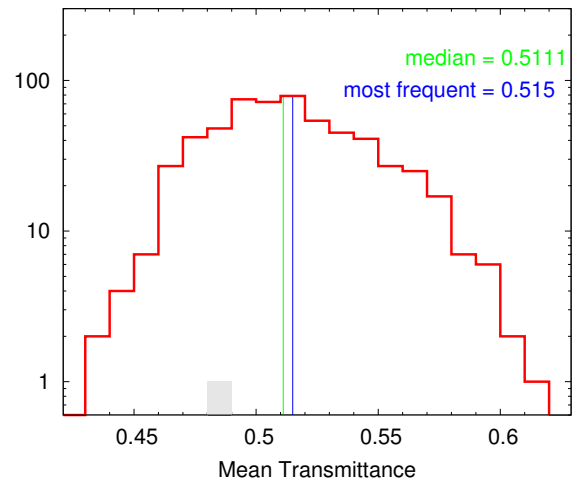

5

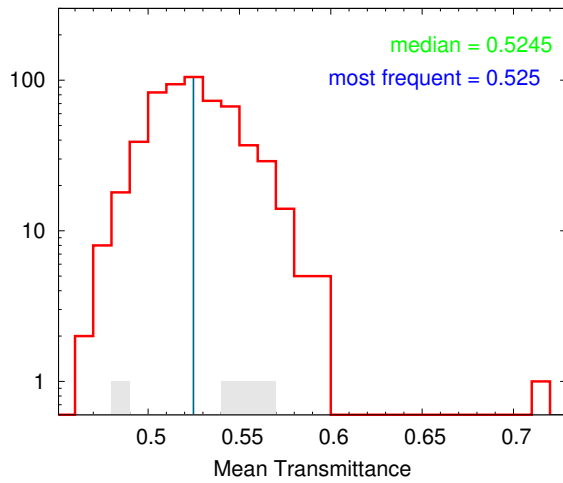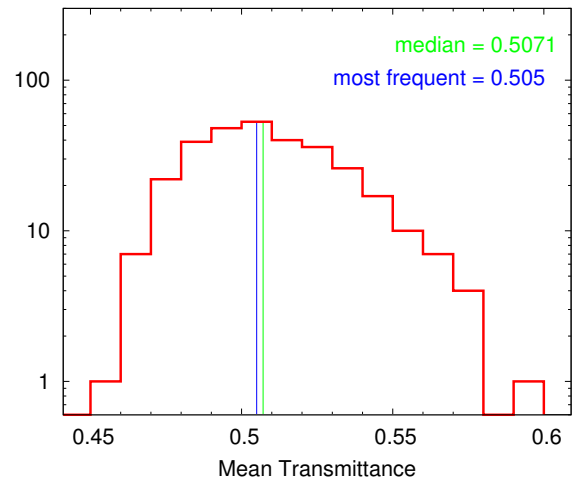

6

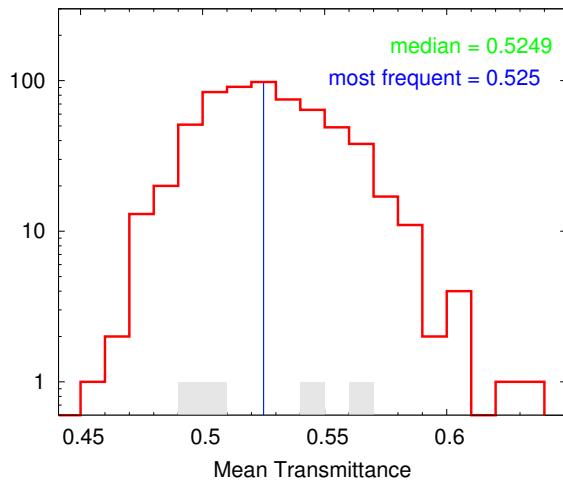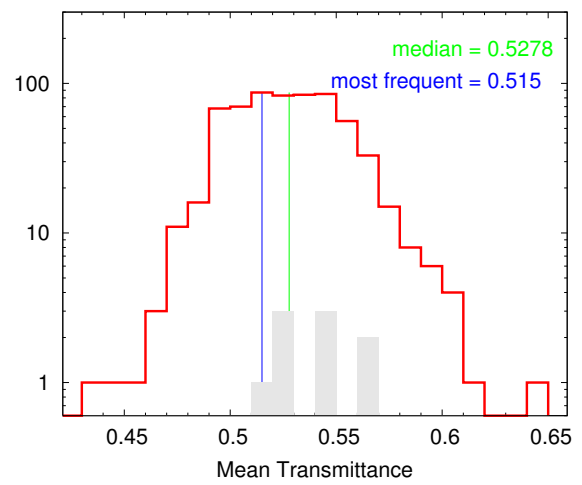

7

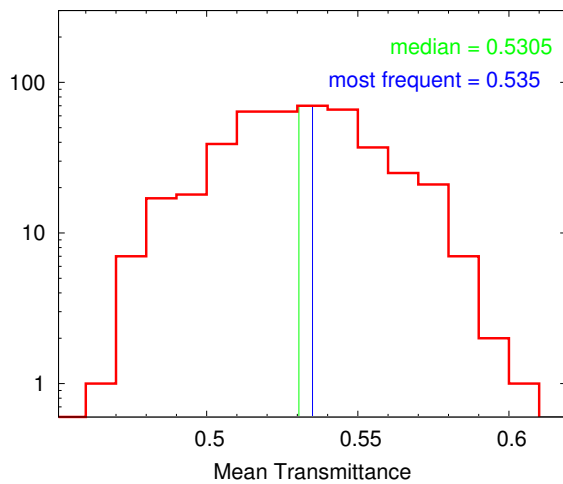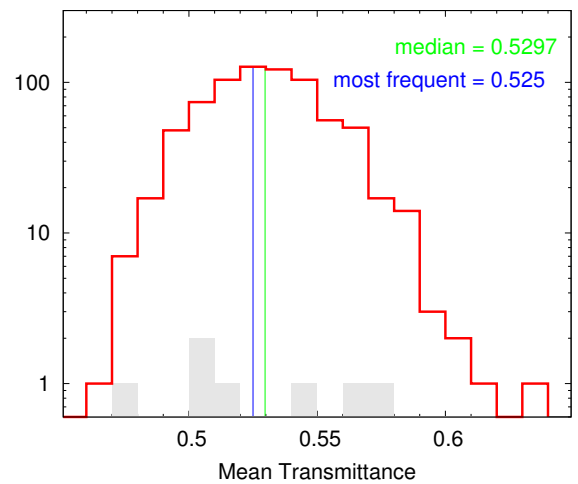

8

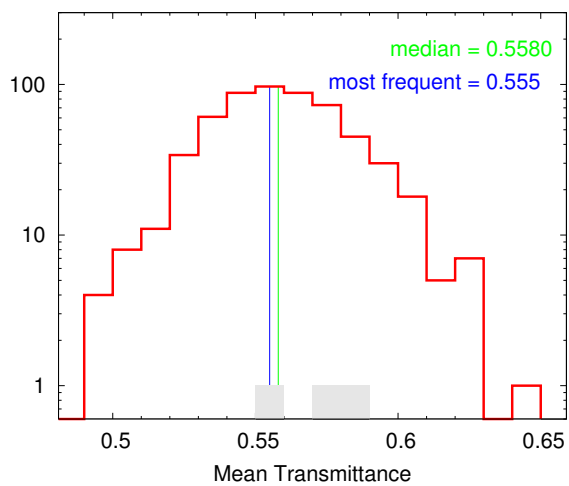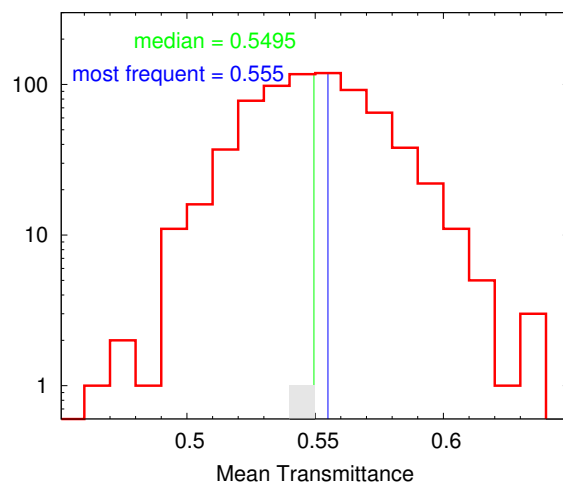

Supplement: s1 [file s1]

donor

plasma

serum, unwashed

1

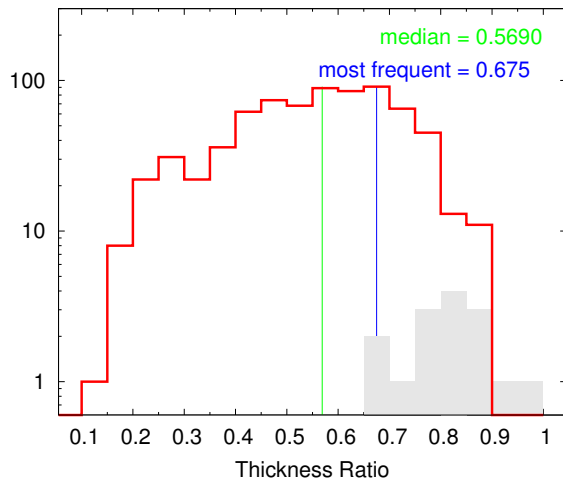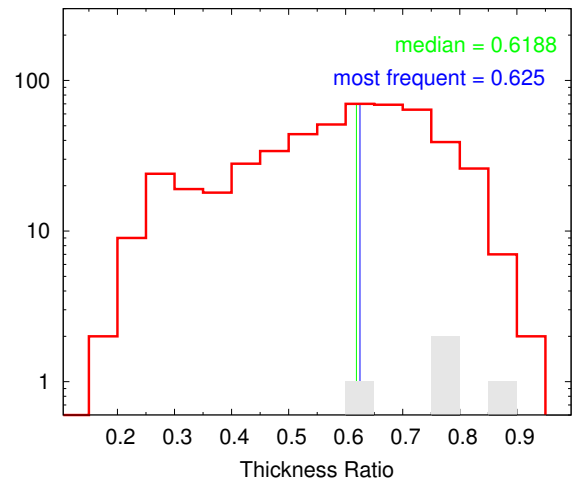

2

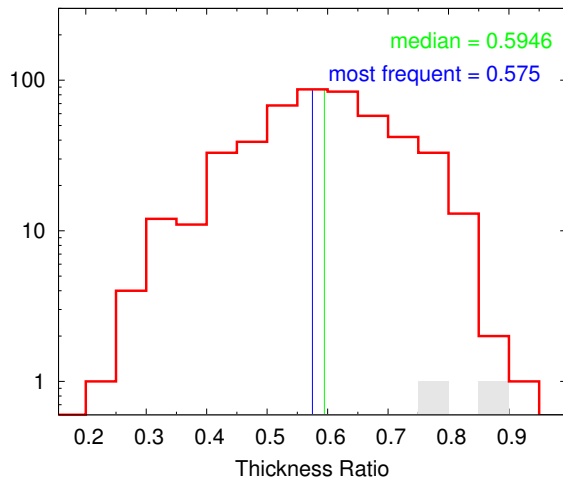

3

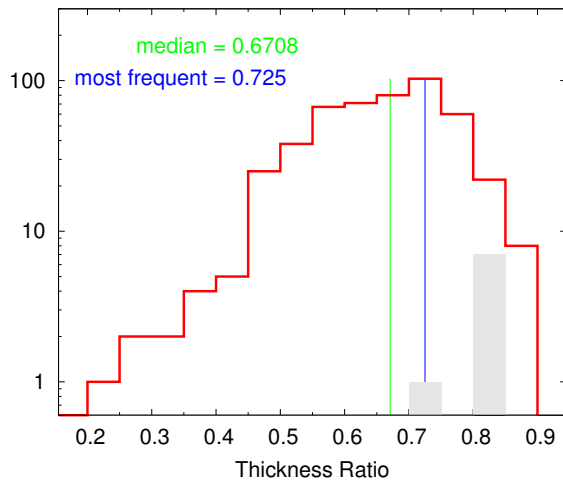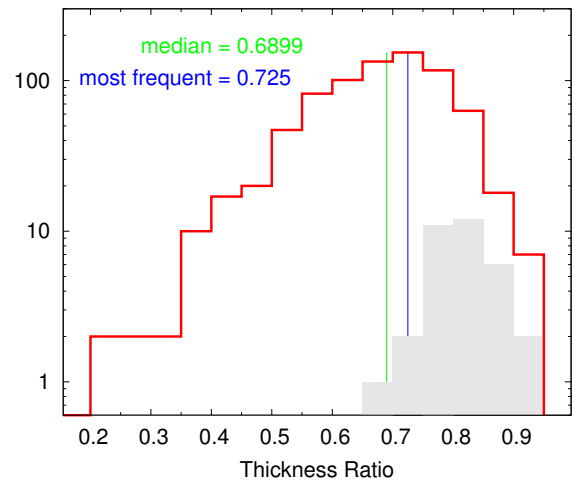

donor

plasma

serum, washed

3

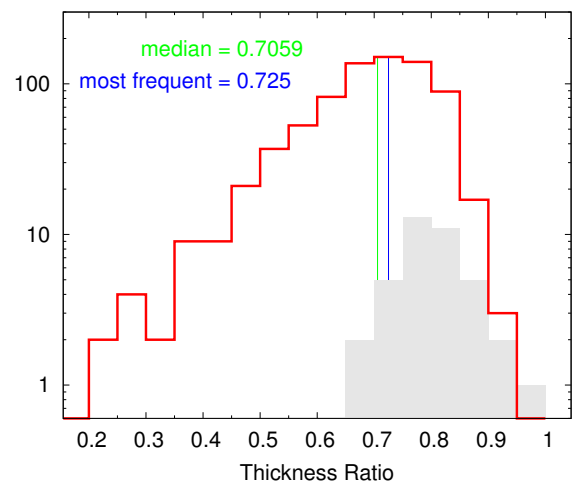

donor

plasma

serum, washed

4

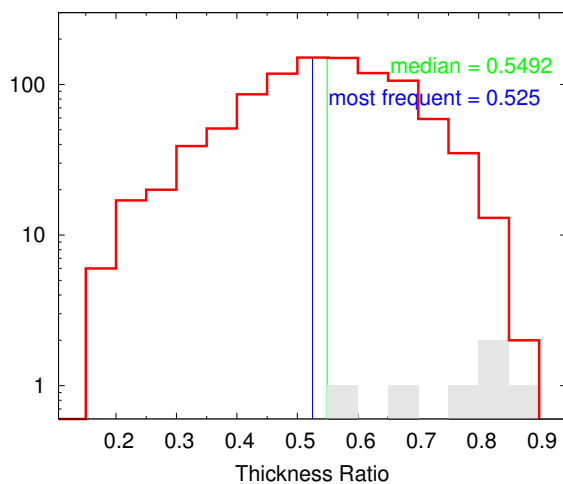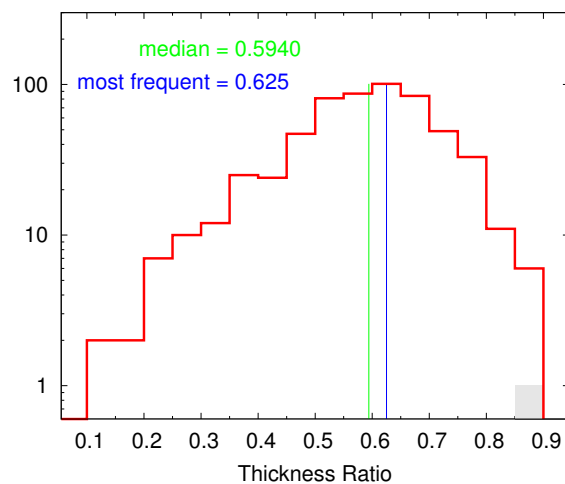

5

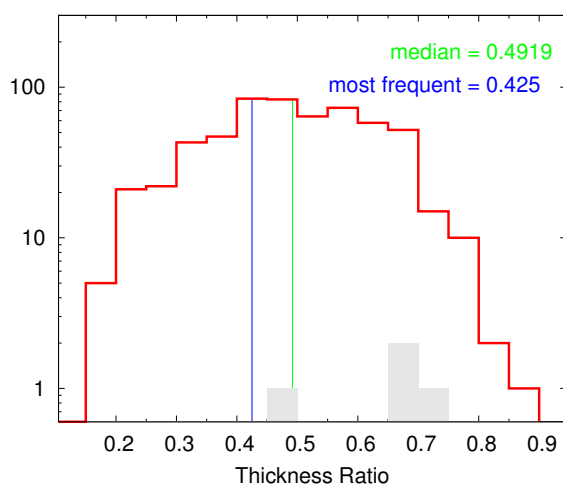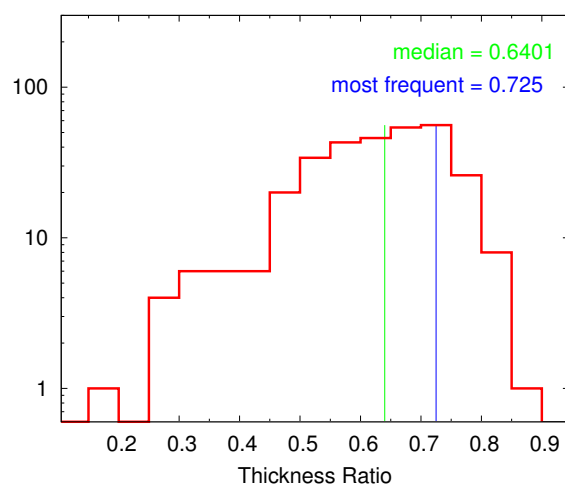

6

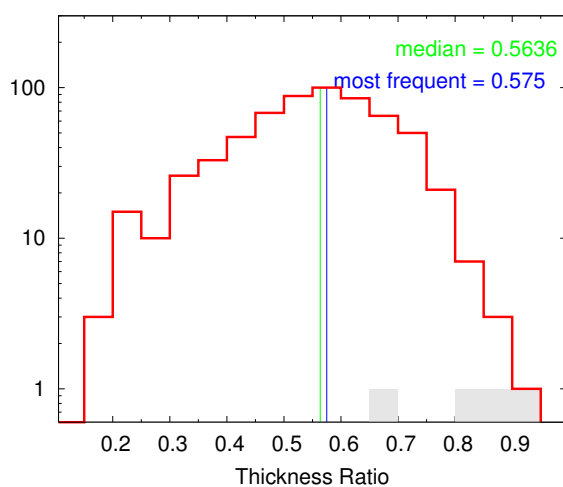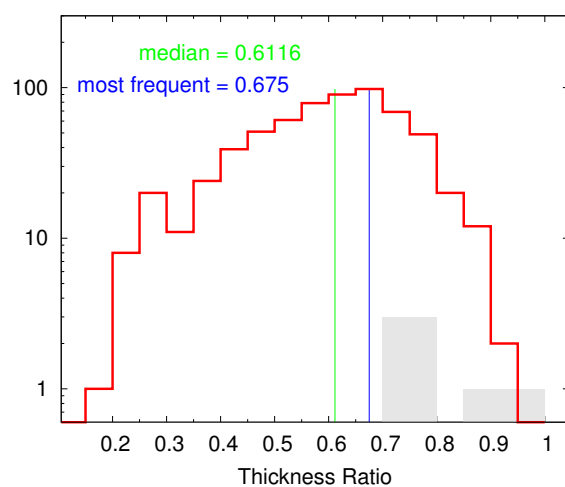

7

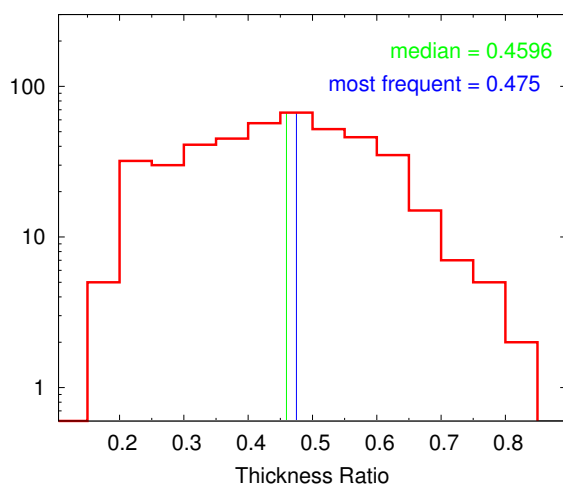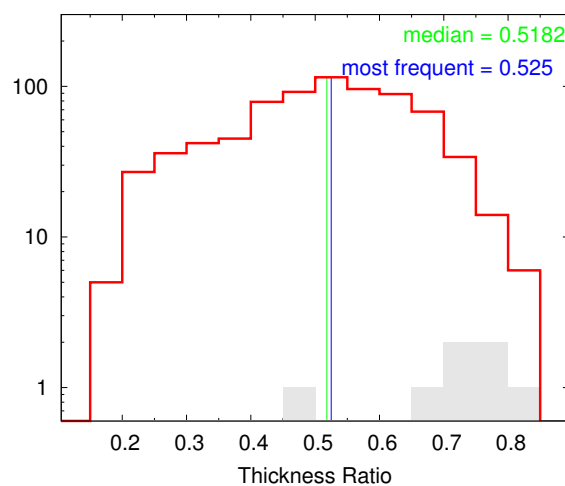

8

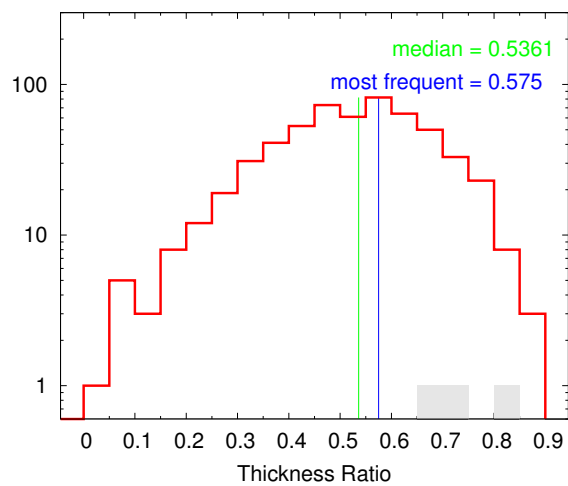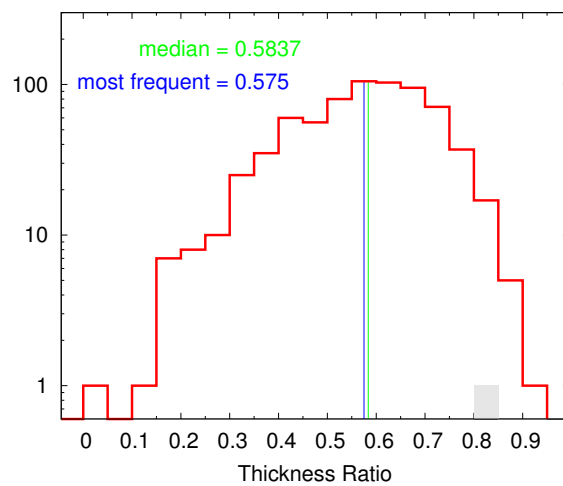

Supplement: s1 [file s1]

donor

plasma

serum, unwashed

1

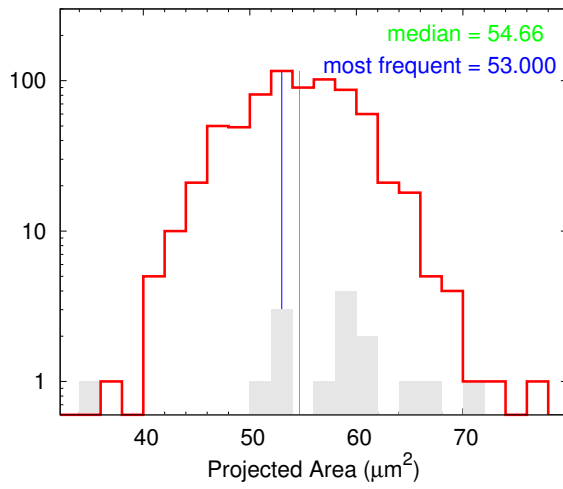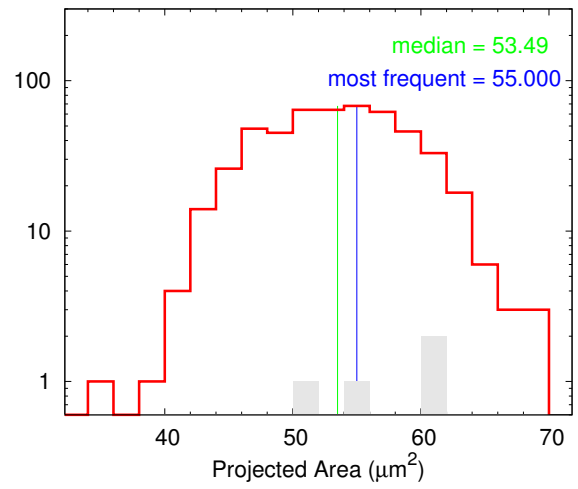

2

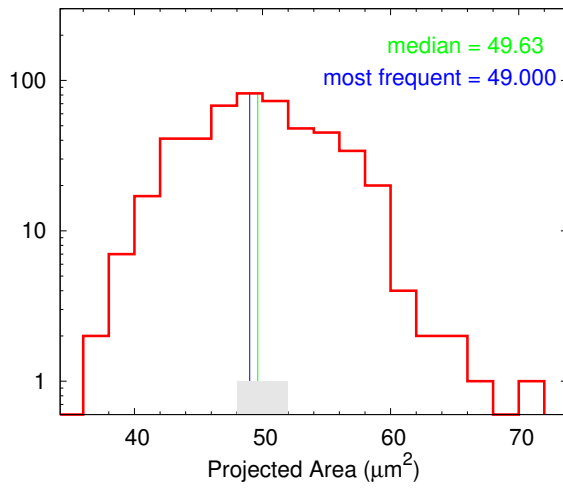

3

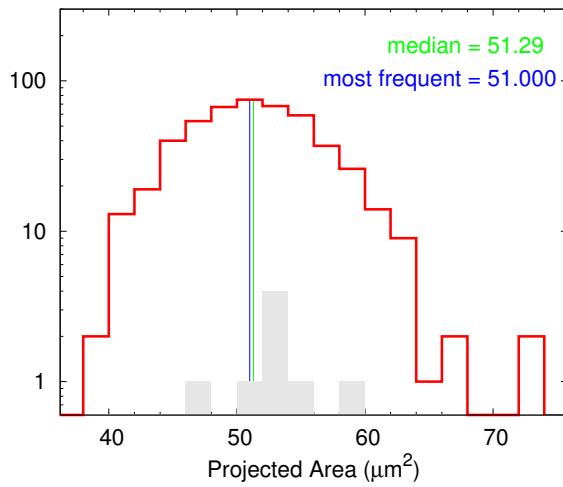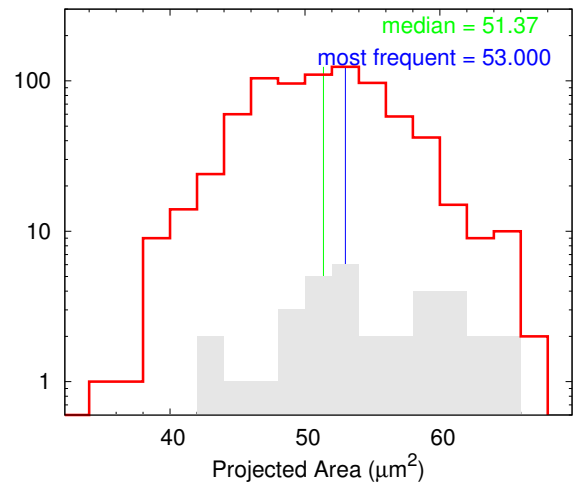

donor

plasma

serum, washed

3

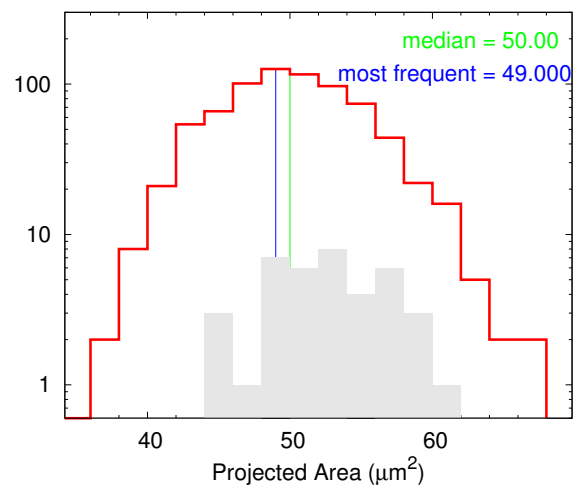

donor

plasma

serum, washed

4

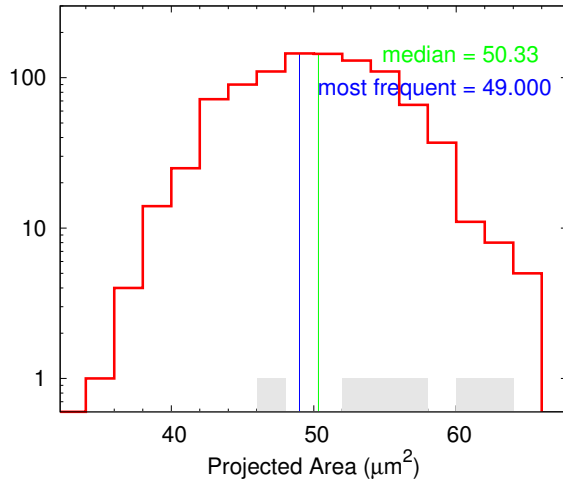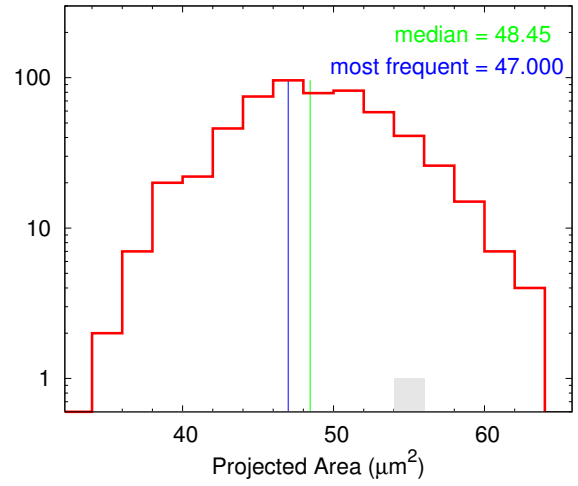

5

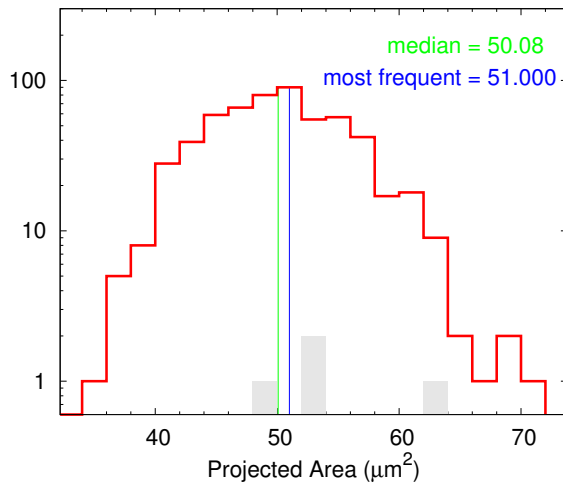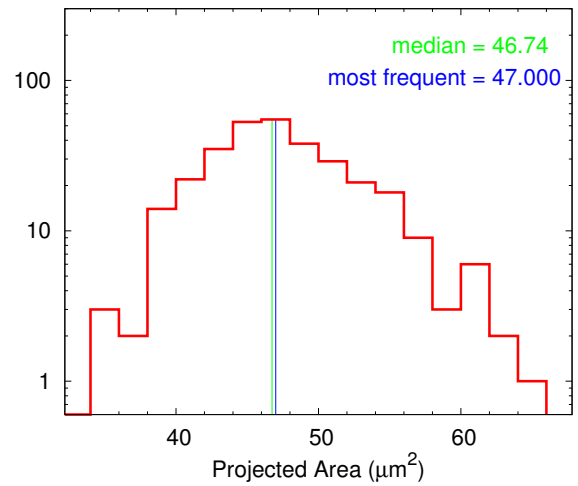

6

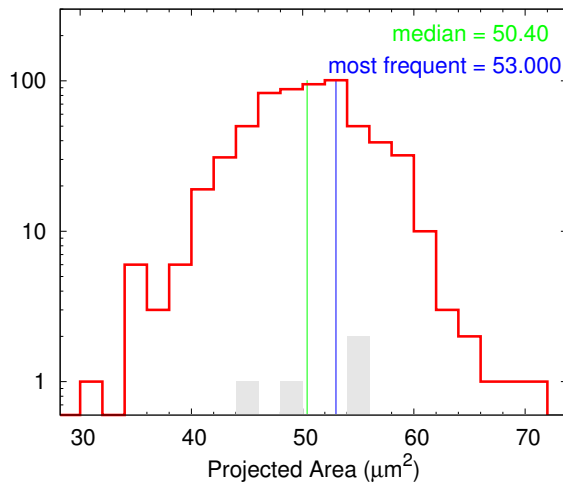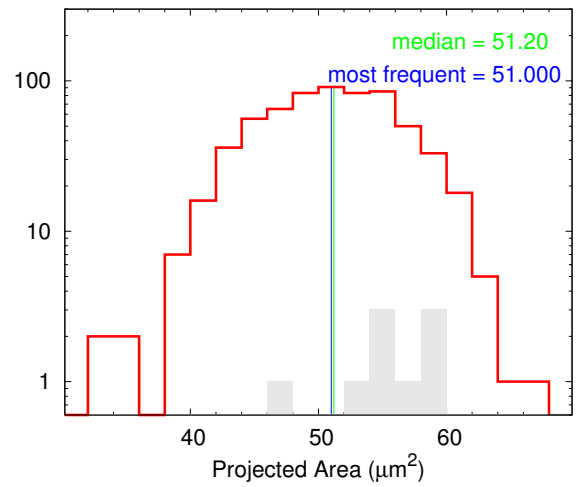

7

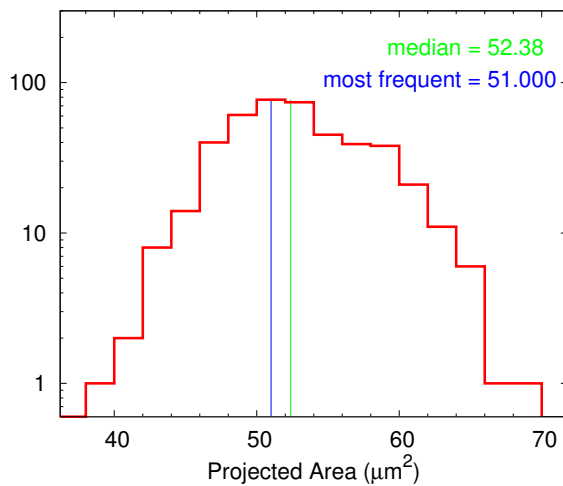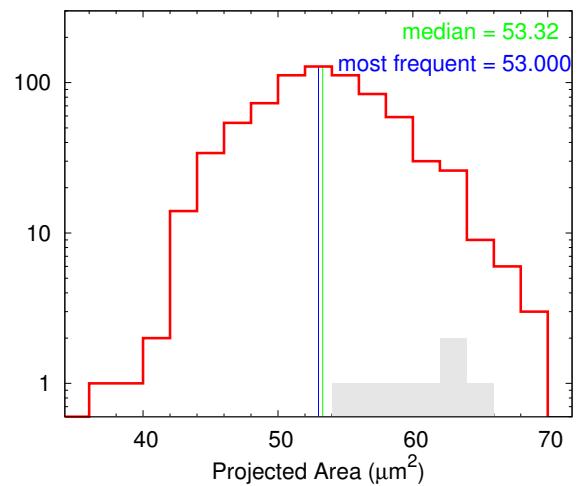

8

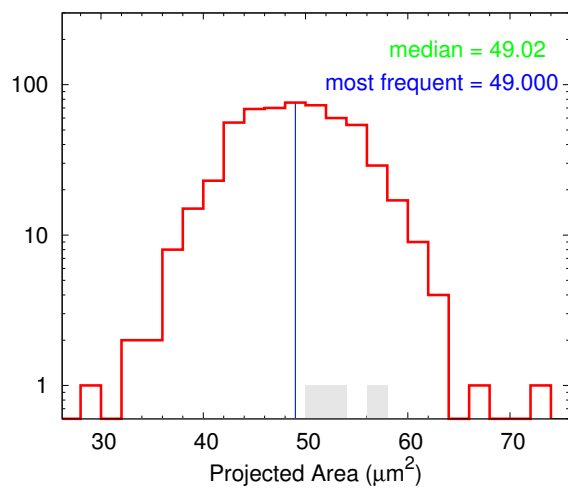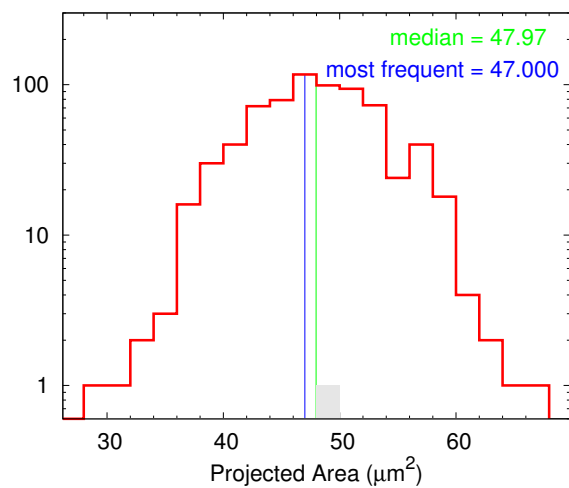

Supplement: s1 [file s1]
